# Supplementary material for: Pan-cancer analysis of genomic and transcriptomic data reveals the prognostic relevance of human proteasome genes in different cancer types
Source: Springer Nature journal article supplement (doi:10.1186/s12885-022-10079-4), 2022-09-19
Supplement: MOESM1 [file 12885_2022_10079_MOESM1_ESM.pdf]

Supplementary figure 1

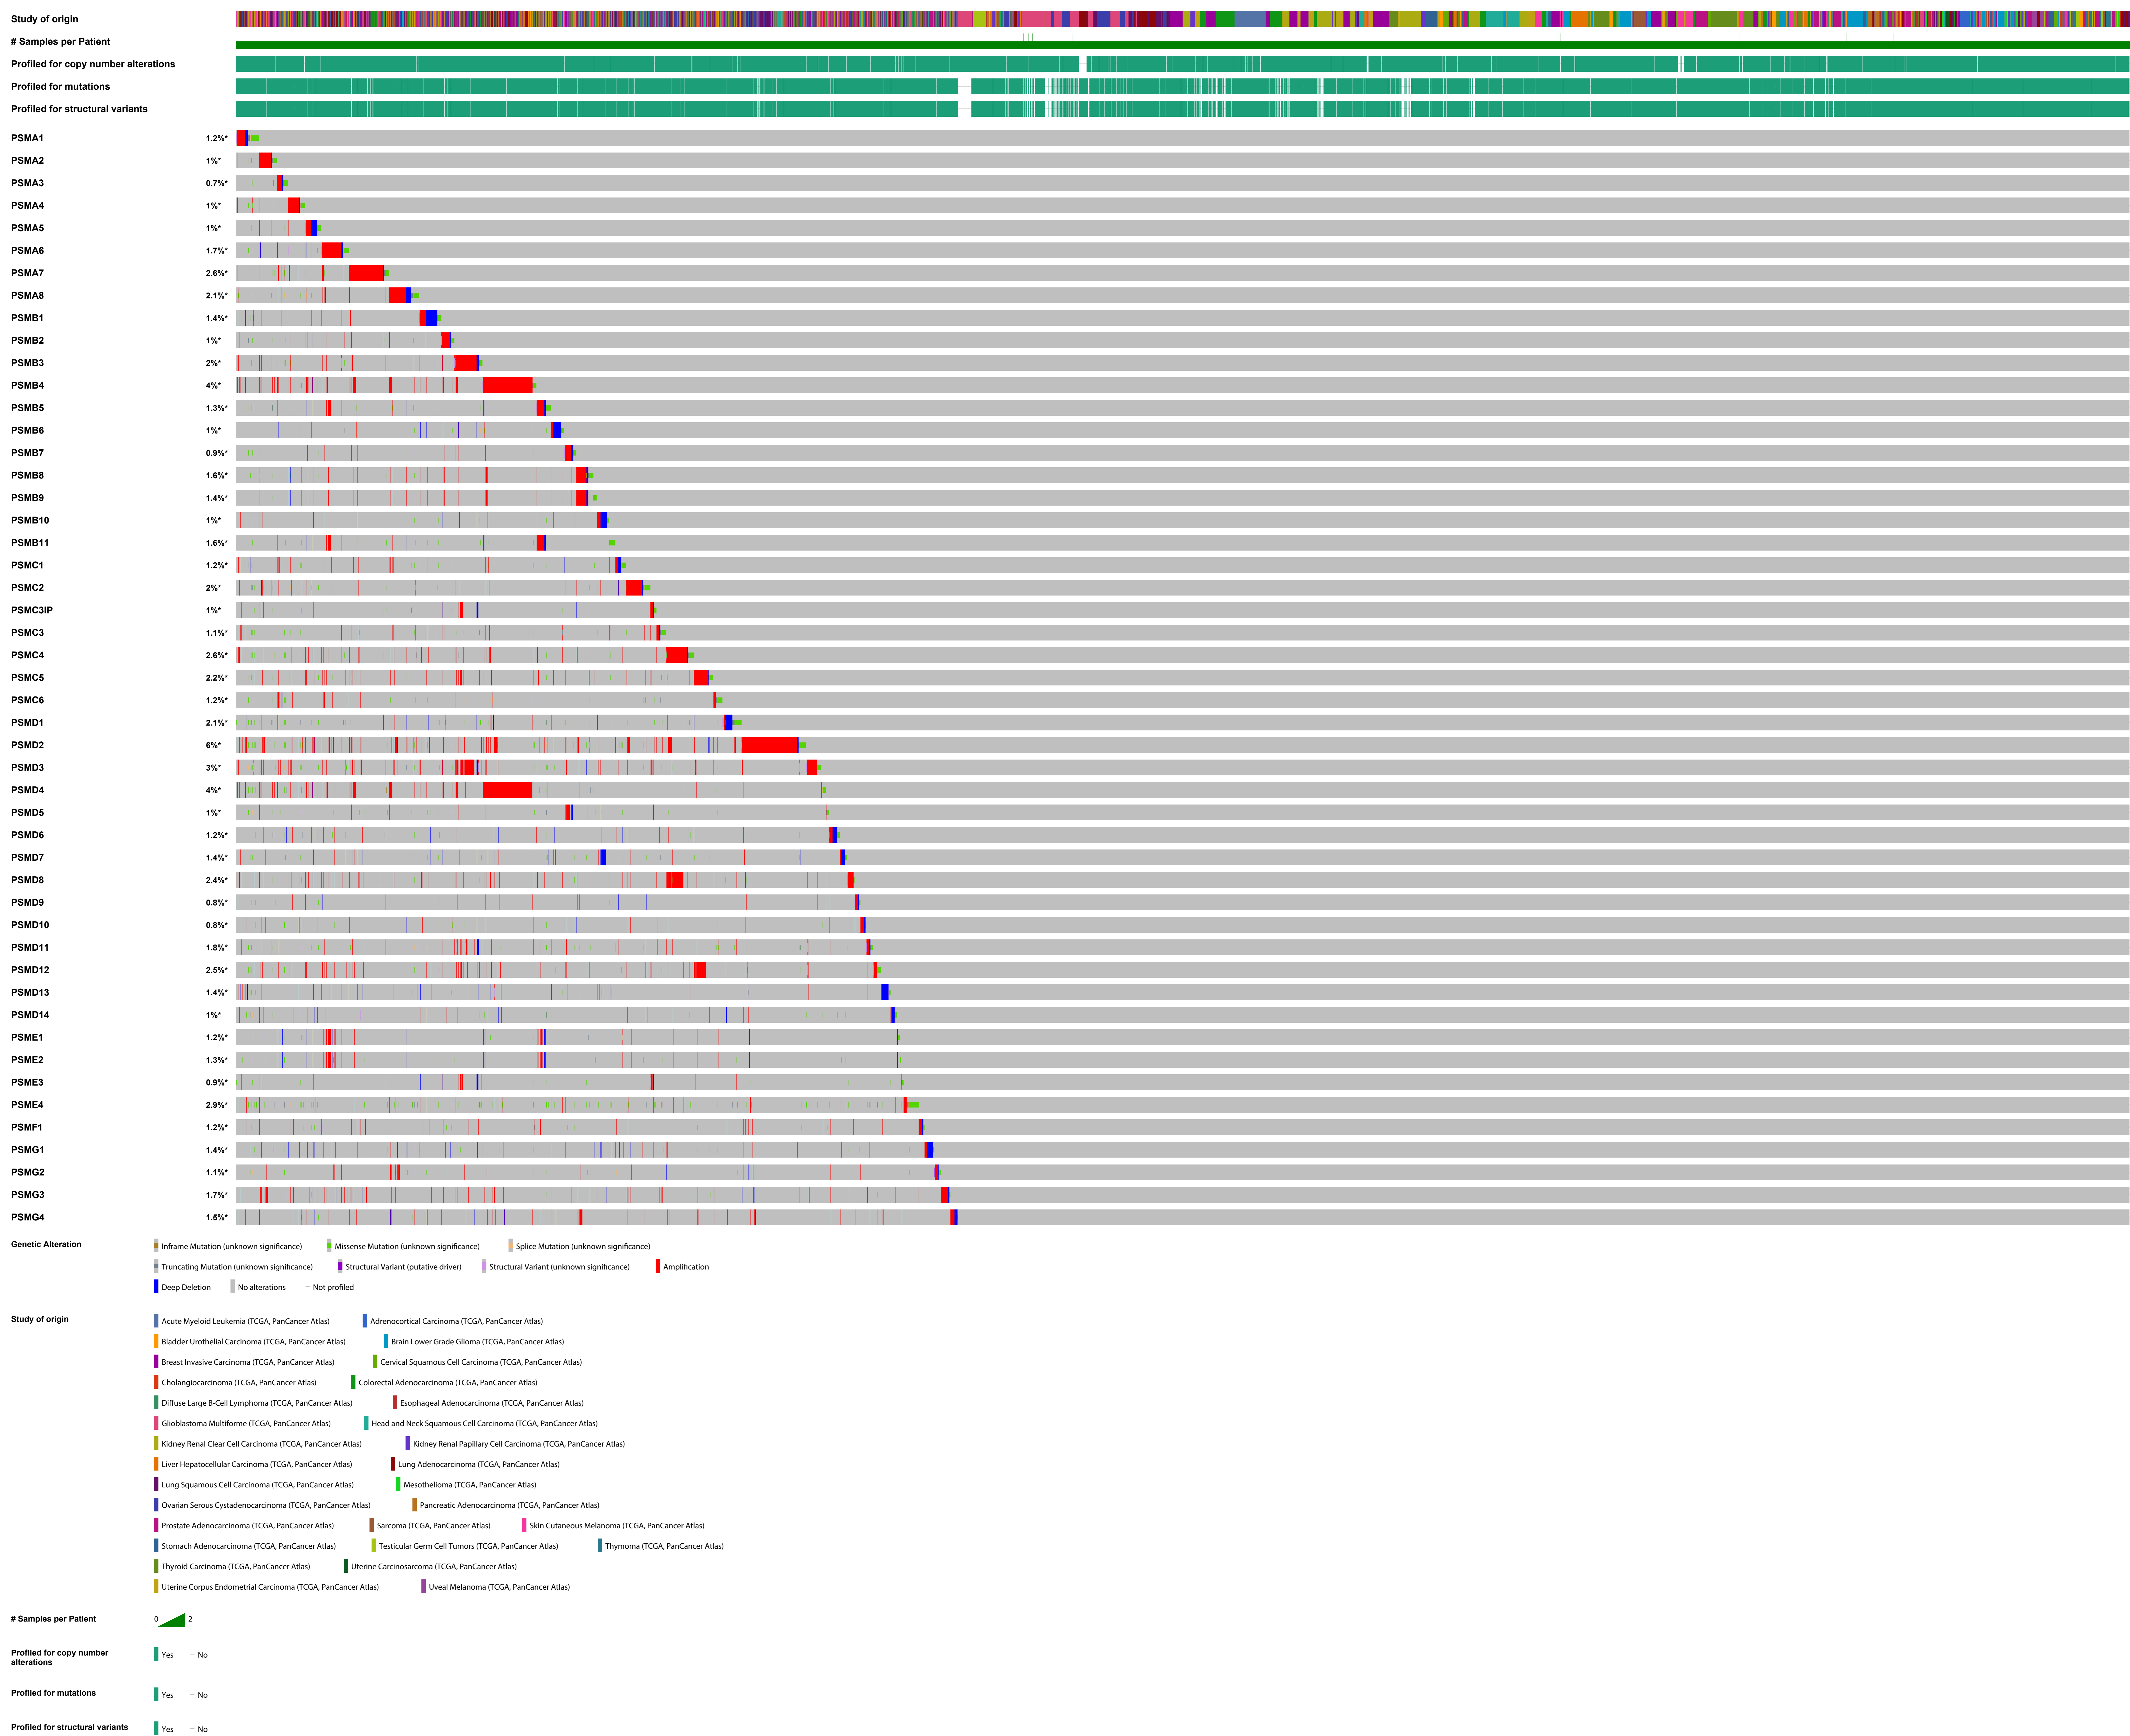

Supplementary Figure 1. OncoPrint conducted by cBioPortal displaying genetic alteration frequency of proteasome genes
