# Supplementary material for: Pan-cancer analysis of genomic and transcriptomic data reveals the prognostic relevance of human proteasome genes in different cancer types
Source: Springer Nature journal article supplement (doi:10.1186/s12885-022-10079-4), 2022-09-19
Supplement: MOESM2 [file 12885_2022_10079_MOESM2_ESM-1.pdf]

## Supplementary Figure 2.

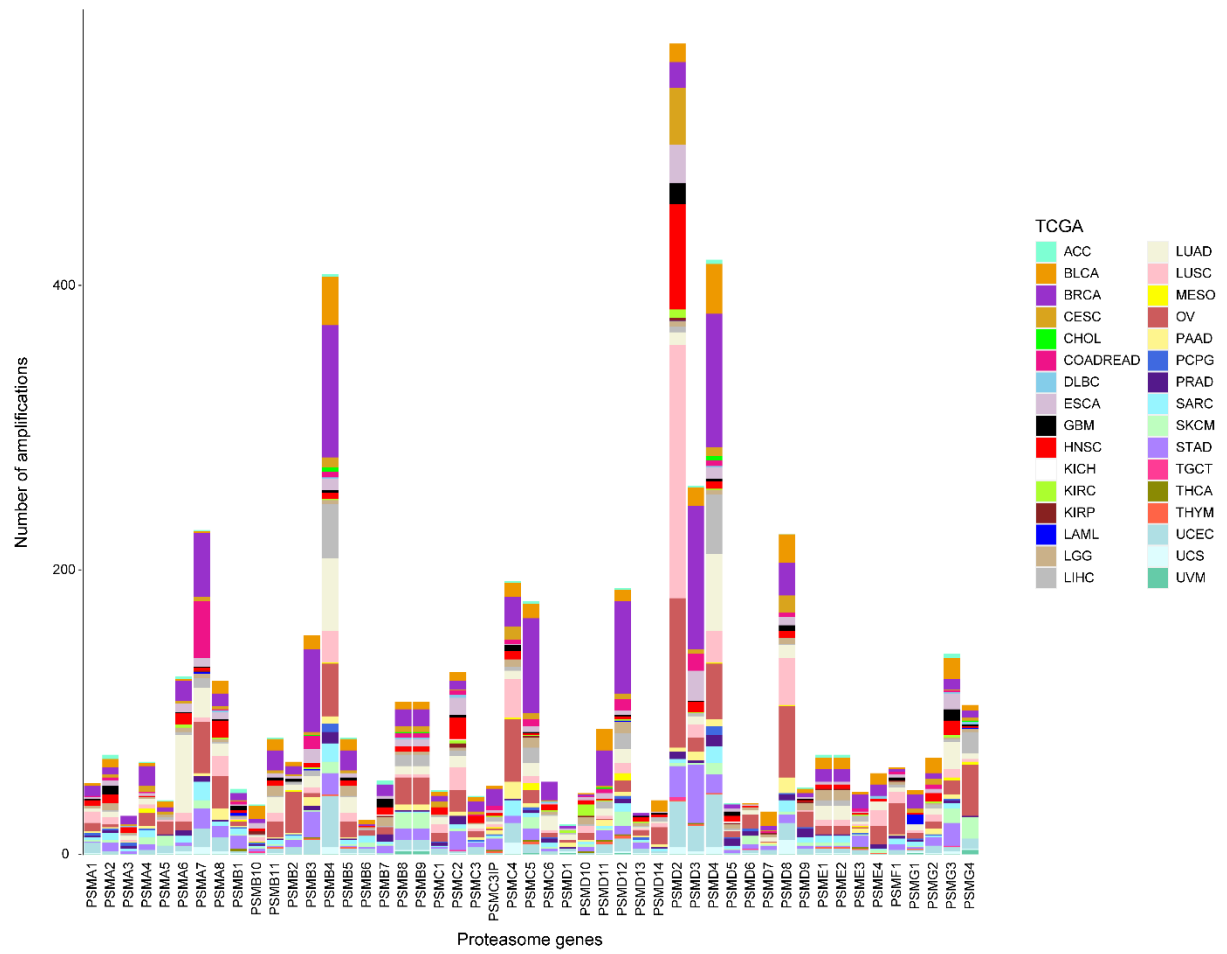

**Supplementary Figure 2.** Stacked bar chart depicting the number of amplifications per PSM gene in the 32 cancer types.

### Supplementary Figure 3.

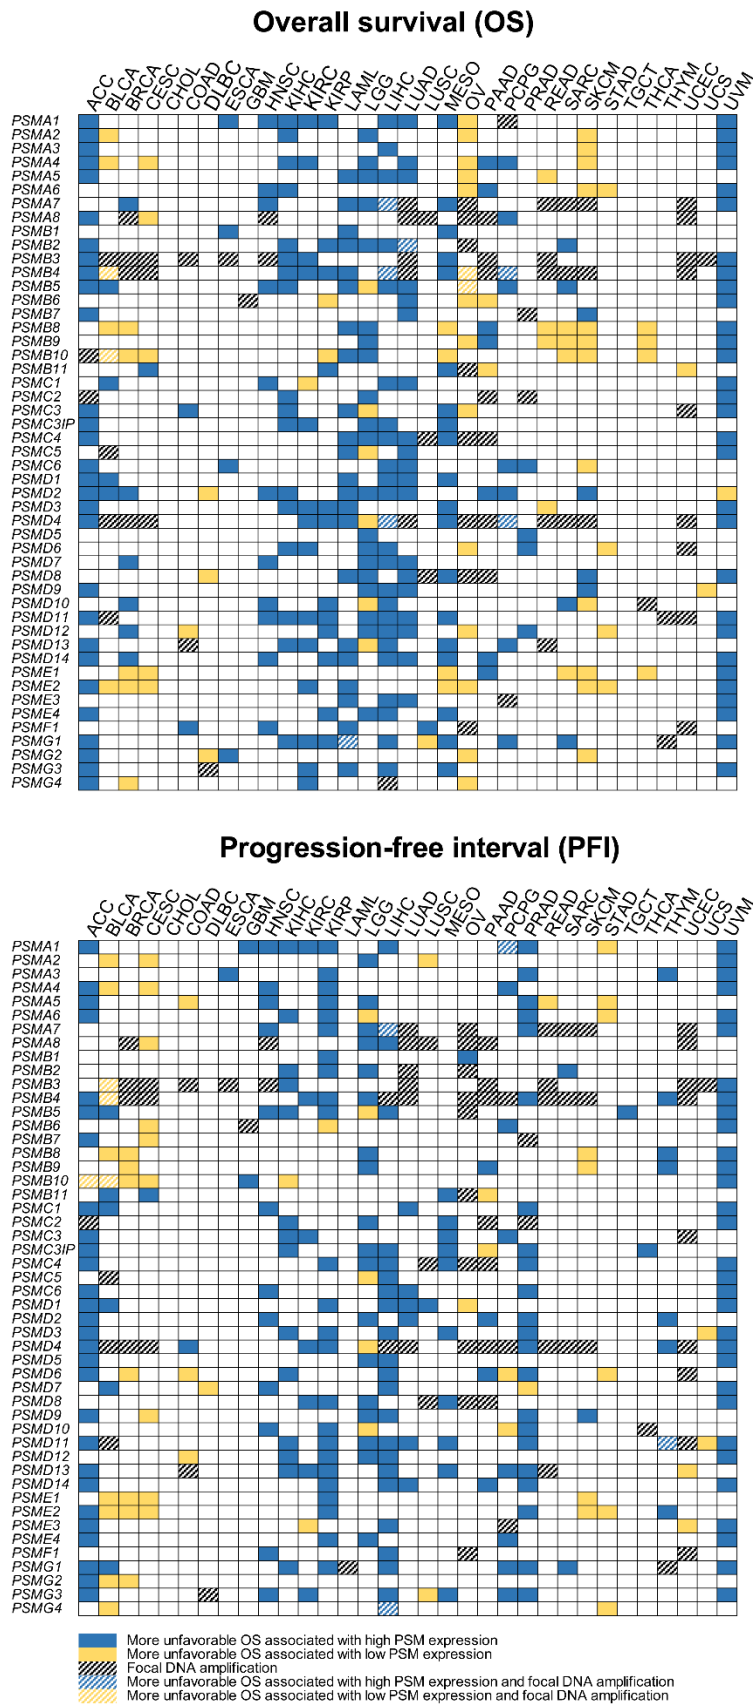

**Supplementary Figure 3.** PSM focal amplification and gene expression associated with patient survival (OS and PFI).

**Supplementary Figure 4.**

**PSMA1 (PFI)**

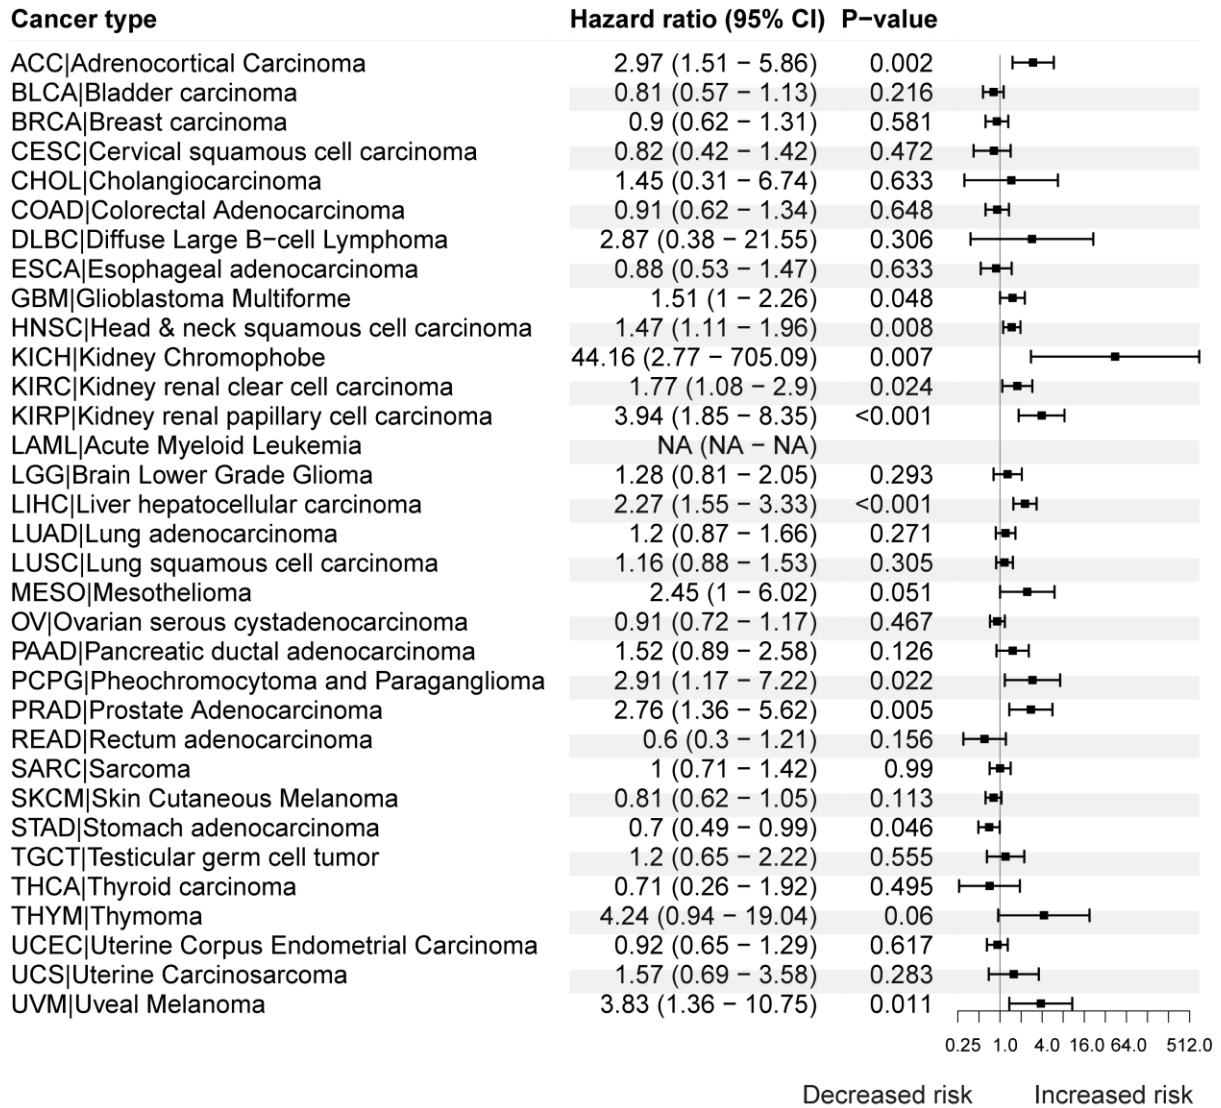

# PSMD2 (OS)

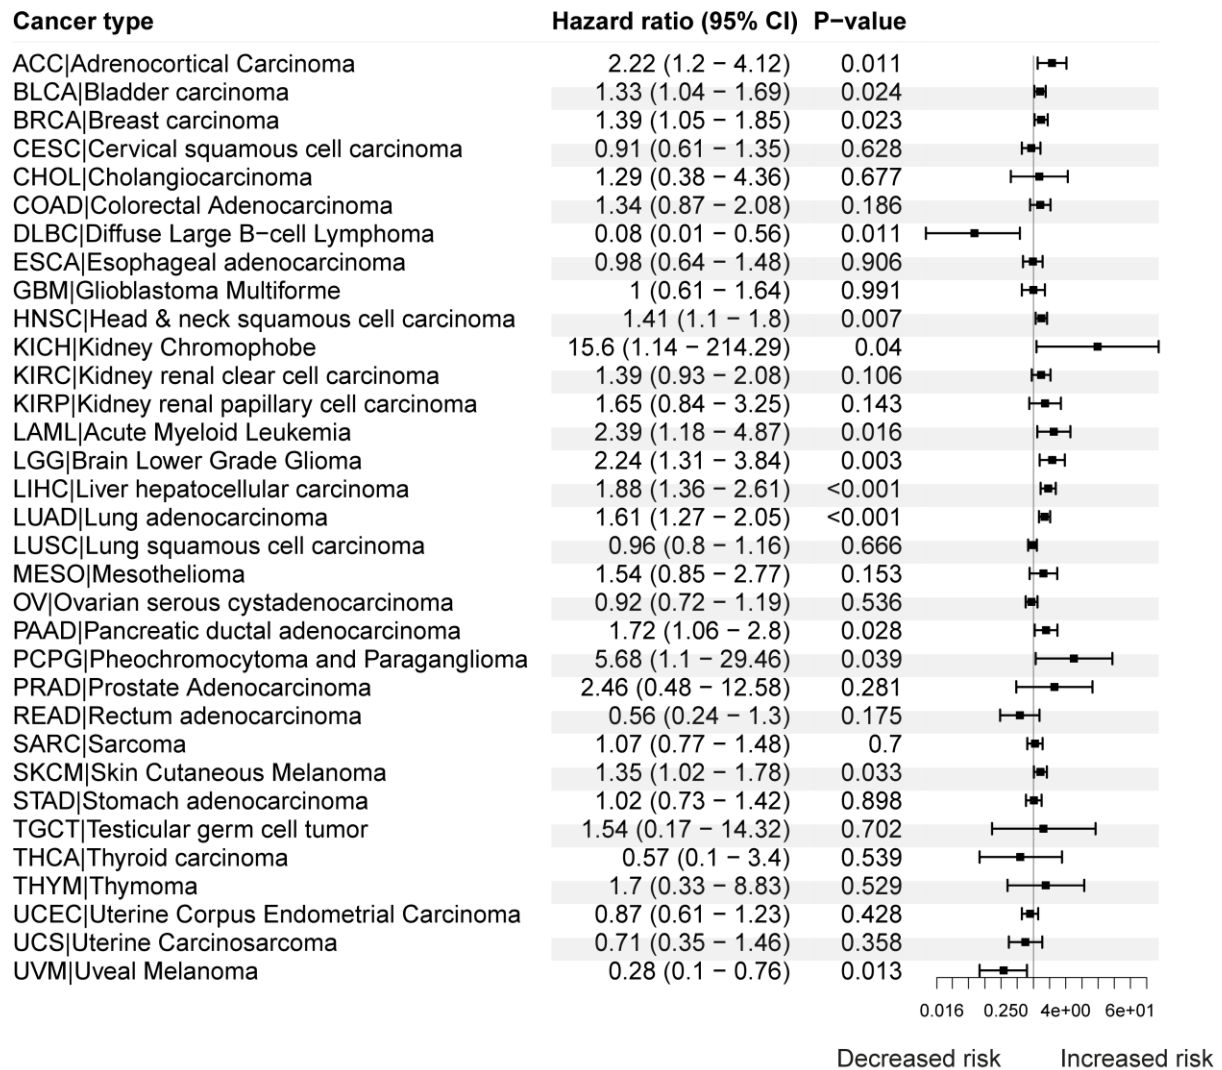

# UVM (OS)

**PSM gene Hazard ratio (95% CI) P-value**

| PSM gene | Hazard ratio (95% CI) | P-value |
|----------|-----------------------|---------|
| PSMA1    | 3.24 (1.04 - 10.14)   | 0.043   |
| PSMA2    | 3.29 (1.05 - 10.38)   | 0.042   |
| PSMA3    | 2.52 (1.39 - 4.57)    | 0.002   |
| PSMA4    | 2.17 (1.18 - 4)       | 0.013   |
| PSMA5    | 1.9 (0.91 - 3.96)     | 0.087   |
| PSMA6    | 3.09 (1.29 - 7.42)    | 0.011   |
| PSMA7    | 2.96 (1.46 - 5.99)    | 0.003   |
| PSMA8    | 0.05 (0.01 - 433.84)  | 0.516   |
| PSMB1    | 2.32 (0.98 - 5.49)    | 0.056   |
| PSMB10   | 2.21 (1.42 - 3.42)    | <0.001  |
| PSMB11   | NA (NA - NA)          |         |
| PSMB2    | 1.46 (0.64 - 3.33)    | 0.364   |
| PSMB3    | 6.84 (2.76 - 16.98)   | <0.001  |
| PSMB4    | 20.63 (4.35 - 97.96)  | <0.001  |
| PSMB5    | 7.72 (2.3 - 25.87)    | <0.001  |
| PSMB6    | 5.44 (1.91 - 15.51)   | 0.002   |
| PSMB7    | 1.44 (0.56 - 3.69)    | 0.453   |
| PSMB8    | 1.75 (1.25 - 2.45)    | 0.001   |
| PSMB9    | 1.48 (1.19 - 1.84)    | <0.001  |
| PSMC1    | 3.1 (1.06 - 9.04)     | 0.038   |
| PSMC2    | 3.66 (1.49 - 9.01)    | 0.005   |
| PSMC3    | 6.03 (2.01 - 18.14)   | 0.001   |
| PSMC3IP  | 0.7 (0.15 - 3.25)     | 0.649   |
| PSMC4    | 7.88 (2.82 - 22.03)   | <0.001  |
| PSMC5    | 7.79 (2.7 - 22.41)    | <0.001  |
| PSMC6    | 1.56 (0.83 - 2.94)    | 0.165   |
| PSMD1    | 1.78 (0.74 - 4.3)     | 0.198   |
| PSMD10   | 0.95 (0.47 - 1.92)    | 0.892   |
| PSMD11   | 5.04 (1.74 - 14.57)   | 0.003   |
| PSMD12   | 2.18 (1.1 - 4.31)     | 0.025   |
| PSMD13   | 3.26 (0.84 - 12.67)   | 0.089   |
| PSMD14   | 2.04 (1.12 - 3.73)    | 0.02    |
| PSMD2    | 0.28 (0.1 - 0.76)     | 0.013   |
| PSMD3    | 4.33 (1.05 - 17.87)   | 0.043   |
| PSMD4    | 14.38 (2.56 - 80.7)   | 0.002   |
| PSMD5    | 1.55 (0.66 - 3.67)    | 0.313   |
| PSMD6    | 0.42 (0.15 - 1.16)    | 0.094   |
| PSMD7    | 2.01 (0.97 - 4.15)    | 0.06    |
| PSMD8    | 8.25 (2.2 - 30.96)    | 0.002   |
| PSMD9    | 0.85 (0.13 - 5.51)    | 0.866   |
| PSME1    | 2.36 (1.2 - 4.65)     | 0.013   |
| PSME2    | 2.28 (1.4 - 3.72)     | <0.001  |
| PSME3    | 6.96 (2.09 - 23.19)   | 0.002   |
| PSME4    | 2.62 (1.42 - 4.85)    | 0.002   |
| PSMF1    | 0.96 (0.26 - 3.63)    | 0.957   |
| PSMG1    | 3 (1.11 - 8.1)        | 0.03    |
| PSMG2    | 2.57 (0.83 - 7.93)    | 0.1     |
| PSMG3    | 5.88 (2.63 - 13.16)   | <0.001  |
| PSMG4    | 0.55 (0.16 - 1.9)     | 0.341   |

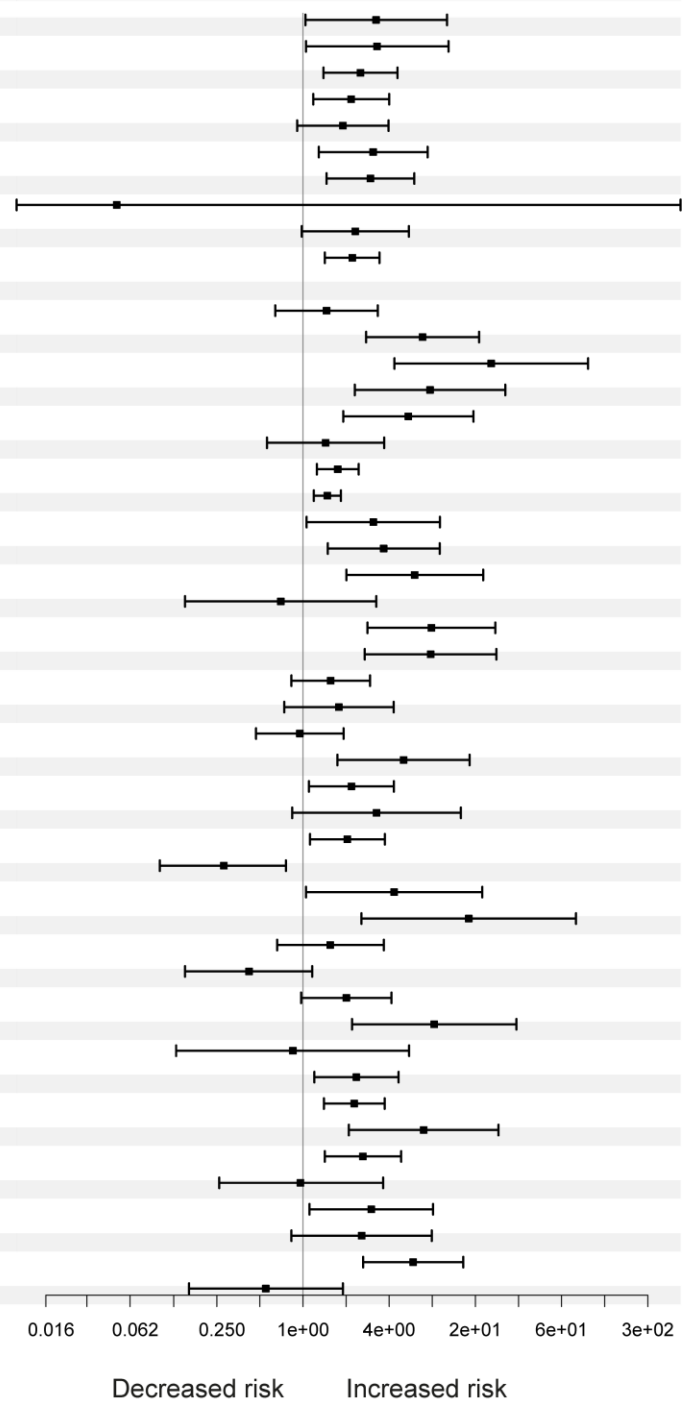

# UVM (PFI)

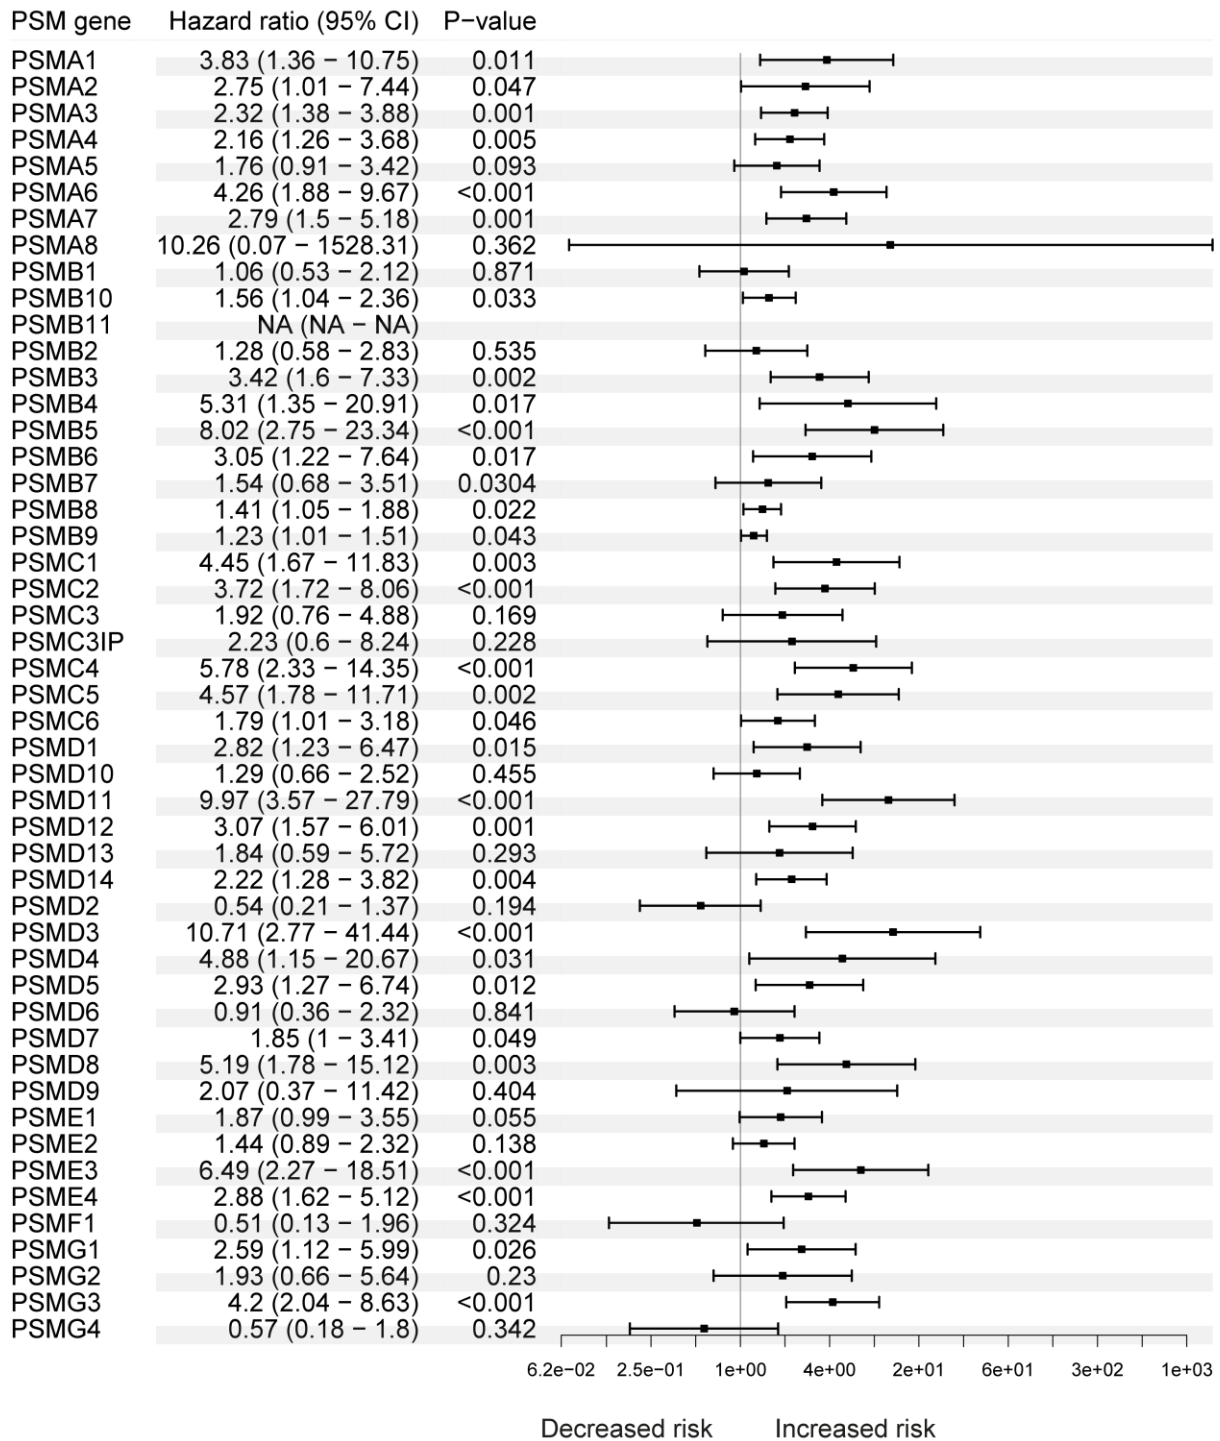

**Supplementary Figures 4.** Forest plots depicting multivariable Cox regression analysis and prognostic relevance (OS and PFI). PSM gene expression patterns in UVM patients and PSM gene (*PSMA1* and *PSMD2*) expression patterns and survival risk in 33 cancer types. HR <1 depicts the association between high PSM gene expression and decreased risk of survival, whereas HR >1 illustrates the association between high PSM gene expression and increased risk of survival.
