# Supplementary material for: Pan-cancer analysis of genomic and transcriptomic data reveals the prognostic relevance of human proteasome genes in different cancer types
Source: BMC Cancer. 2022 Sep 19;22:993. doi: 10.1186/s12885-022-10079-4 (PMC9484138; doi:10.1186/s12885-022-10079-4)
Supplement: Supplementary file 3 — Additional file 3: Supplementary Table 1. Amplification of the 49 human proteasome gene family members. [file 12885_2022_10079_MOESM3_ESM.xlsx]

## Sheet: Sheet1
Supplementary Table 1. Amplification of the 49 human proteasome gene family members
Gene symbol and full name		Subunita	Chromosomeb	Amplified	Focal amplificationc	Broad amplificationc	Differential expression between amplification vs non-amplificationd	Cancer driver genese	Cancer driver genes (amplification)f	Amplified and mutatedg	Amplified and fusion geneg
Class I: Proteasome 20S subunit
PSMA1	Proteasome 20S subunit alpha 1	α6	11p15.2	UCEC, SKCM, LUSC, LGG, UCS, HNSC, BLCA, PAAD, LUAD, OV, STAD, BRCA, SARC, COAD, PRAD ESCA, GBM, READ, PCPG	1	2		RRAS2		LUSC
PSMA2	Proteasome 20S subunit alpha 2	α2	7p14.1	ACC, ESCA, UCEC, SARC, BLCA, STAD, SKCM, LUSC, LGG, HNSC, PAAD, LUAD, GBM, COAD, CESC, BRCA, PRAD, OV, LIHC, PCPG, READ,	0	22
PSMA3	Proteasome 20S subunit alpha 3	α7	14q23.1	DLBC, STAD, LUSC, HNSC, BRCA, LIHC, SARC, LUAD, PAAD, PRAD, LGG, CESC, PCPG,	0	4
PSMA4	Proteasome 20S subunit alpha 4	α3	15q25.1	MESO, SKCM, OV, SARC, UCEC, CESC, ESCA, STAD, BRCA, LUSC, BLCA, ACC, PAAD, LUAD, COAD, LGG, HNSC, READ, PCPG	0	2				UCEC
PSMA5	Proteasome 20S subunit alpha 5	α5	1p13.3	BLCA, OV, UCEC, SKCM, UCS, CESC, LUSC, ACC, LIHC, BRCA, PRAD, LGG,	0	5
PSMA6	Proteasome 20S subunit alpha 6	α1	14q13.2	LUAD, ESCA, UCS, ACC, SARC, HNSC, UCEC, STAD, CESC, BRCA, OV, LUSC, PRAD, KIRC, LGG, LIHC, GBM, BLCA,	0	4		NFKBIA		BLCA	CESC
PSMA7	Proteasome 20S subunit alpha 7	α4	20q13.33	UCS, COAD, OV, UCEC, SARC, STAD, LUAD, BRCA, ESCA, LIHC, SKCM, CESC, ACC, PAAD, PRAD, KIRP, LUSC, LGG, LAML, BLCA, HNSC, GBM, READ	7	20					BRCA
PSMA8	Proteasome 20S subunit alpha 8	-	18q11.2	ESCA, LUSC, UCEC, PAAD, OV, STAD, UCS, BRCA, HNSC, COAD, LUAD, DLBC, CESC, SARC, BLCA, PRAD, LGG, LIHC, GBM, KIRC, READ	7	1				BLCA
PSMB1	Proteasome 20S subunit beta 1	β6	6q27	UCS, ACC, STAD, OV, SKCM, SARC, MESO, PAAD, LIHC, UCEC, LAML, CESC, HNSC, BRCA, LGG, GBM, COAD, LUSC, ESCA, THCA, PCPG, READ,	0	3
PSMB2	Proteasome 20S subunit beta 2	β4	1p34.3	OV, UCEC, SKCM, STAD, BRCA, MESO, ESCA, LUAD, LIHC, SARC, BLCA, CESC, PAAD, GBM, PCPG,	2	5		ZC3H12A			OV, LIHC
PSMB3	Proteasome 20S subunit beta 3	β3	17q12	ESCA, BRCA, STAD, UCEC, BLCA, PAAD, CHOL, COAD, OV, LIHC, LUSC, SKCM, LUAD, PRAD, THYM, HNSC, CESC, LAML, THCA, KIRC, READ	11	8	****	ERBB2, IKZF3	ERBB2	STAD	ESCA, BLCA, BRCA
PSMB4	Proteasome 20S subunit beta 4	β7	1q21.3	LIHC, LUAD, UCS, BRCA, BLCA, CHOL, UCEC, OV, SARC, LUSC, ESCA, STAD, PAAD, CESC, SKCM, ACC, DLBC, PRAD, COAD, MESO, HNSC, THYM, LGG, GBM, KIRC, READ, PCPG	12	22	****	FLG, TCHH, HRNR, NUP210L		BLCA
PSMB5	Proteasome 20S subunit beta 5	β5	14q11.2	BLCA, OV, UCEC, LUAD, ACC, LUSC, UCS, BRCA, ESCA, STAD, LGG, LIHC, HNSC, SARC, PAAD, CESC, SKCM, THYM, PRAD, GBM	1	5				BRCA
PSMB6	Proteasome 20S subunit beta 6	β1	17p13.2	UCEC, LIHC, SARC, BLCA, UCS, STAD, SKCM, OV, BRCA, HNSC, LGG	1	3		SMTNL2, ZZEF1
PSMB7	Proteasome 20S subunit beta 7	β2	9q33.3	ACC, SKCM, UCEC, STAD, PRAD, GBM, LGG, HNSC, ESCA, BRCA, OV, LIHC, SARC, KIRP, KIHC,	1	5		PPP6C			SARC
PSMB8	Proteasome 20S subunit beta 8	β5i	6p21.32	DLBC, SKCM, STAD, OV, CHOL, ESCA, CESC, BLCA, UCEC, UVM, PAAD, LIHC, COAD, UCS, LUSC, BRCA, LUAD, HNSC, LGG, PRAD, SARC, READ,	0	5		STK19, HLA-DRB1		SKCM
PSMB9	Proteasome 20S subunit beta 9	β1i	6p21.32	DLBC, OV, STAD, UCEC, BLCA, CHOL, ESCA, SKCM, UVM, LIHC, PAAD, CESC, UCS, COAD, LUAD, BRCA, HNSC, SARC, LUSC, PRAD, LGG, READ	0	5		STK19, HLA-DRB1
PSMB10	Proteasome 20S subunit beta 10	β2i	16q22.1	ESCA, BLCA, UCEC, PRAD, BRCA, MESO, STAD, SKCM, ACC, HNSC, KIRP, TGCT, LUSC, LIHC, LUAD, SARC, PCPG,	2	3		CBFB, CTCF, CDH1
PSMB11	Proteasome 20S subunit beta 11	β5t	14q11.2	UCEC, LUAD, BLCA, OV, STAD, LUSC, SKCM, UCS, BRCA, ESCA, SARC, LGG, CESC, HNSC, ACC, LIHC, GBM, THYM, PRAD, PAAD,	1	5
Class II: Proteasome 26S subunit
PSMC1	Proteasome 26S subunit, ATPase 1	Rpt2	14q32.11	ACC, LGG, LIHC, PCPG, SARC, STAD, PRAD, BLCA, BRCA, CESC, UCEC, HNSC, LUAD, LUSC, OV	0	4
PSMC2	Proteasome 26S subunit, ATPase 2	Rpt1	7q22.1	CESC, KICH, TGCT, UCEC, UCS, DLBC, GBM, KIRC, LGG, SKCM, COAD, READ, KIRP, PAAD, SARC, LIHC, BLCA, BRCA, PRAD, LUAD, ESCA, STAD, HNSC, OV, LUSC	3	22		CUX1		HNSC
PSMC3IP	PSMC3 Interacting Protein		17q21.2	KIRC, MESO, OV, PCPG, SARC, SKCM, THCA, THYM, UCEC, BLCA, ESCA, HNSC, LUAD, LUSC, COAD, READ, LIHC, PAAD, STAD, BRCA	0	8		STAT3
PSMC3	Proteasome 26S subunit, ATPase 3	Rpt5	11p11.2	ACC, COAD, READ, LGG, PCPG, SARC, CESC, LUSC, PAAD, BLCA, LUAD, STAD, OV, HNSC, UCEC, BRCA	1	2				OV
PSMC4	Proteasome 26S subunit, ATPase 4	Rpt3	19q13.2	ACC, ESCA, MESO, PRAD, COAD, READ, LIHC, GBM, LGG, STAD, HNSC, LUAD, UCS, CESC, BLCA, SARC, PAAD, UCEC, BRCA, LUSC, OV	3	7		NUMBL, CIC, POU2F2, ERF		BRCA	SARC
PSMC5	Proteasome 26S subunit, ATPase 5	Rpt6	17q23.3	GBM, HNSC, KIRC, KIRP, THCA, UVM, ACC, PCPG, PRAD, THYM, PAAD, SARC, CESC, ESCA, COAD, READ, LUSC, MESO, UCEC, LGG, SKCM, STAD, LUAD, OV, BLCA, LIHC, BRCA	1	8		CD79B		BRCA, UCEC	BRCA
PSMC6	Proteasome 26S subunit, ATPase 6	Rpt4	14q22.1	CESC, DLBC, ESCA, KIRC, LIHC, PCPG, SKCM, LGG, LUSC, STAD, UCEC, OV, PRAD, SARC, HNSC, LUAD, BRCA	0	4		CBFB, CTCF, CDH1		HNSC
PSMD1	Proteasome 26S subunit, non-ATPase 1	Rpn2	2q37.1	ACC, ESCA, LIHC, PRAD, UCS, UVM, BRCA, KIRC, OV, UCEC, PAAD, LUAD	0	5		HJURP
PSMD2	Proteasome 26S subunit, non-ATPase 2	Rpn1	3q27.1	THYM, KIRP, SKCM, TGCT, PAAD, SARC, LGG, LIHC, PRAD, UCS, KIRC, LUAD, BLCA, GBM, BRCA, STAD, ESCA, UCEC, CESC, HNSC, OV, LUSC	0	11		KLHL6		CESC, LUSC, SKCM
PSMD3	Proteasome 26S subunit, non-ATPase 3	Rpn3	17q21.1	ACC, GBM, KIRC, SKCM, THCA, THYM, LIHC, PRAD, UCS, CESC, LUAD, PAAD, HNSC, LUSC, OV, COAD, READ, BLCA, UCEC, ESCA, STAD, BRCA	0	8				BLCA, BRCA, COADREAD	BRCA, LUAD, OV
PSMD4	Proteasome 26S subunit, non-ATPase 4	Rpn10	1q21.3	DLBC, KIRC, MESO, THYM, GBM, ACC, CHOL, LGG, COAD, READ, HNSC, PAAD, UCS, CESC, PCPG, ESCA, PRAD, SKCM, SARC, STAD, LUSC, BLCA, UCEC, OV, LIHC, LUAD, BRCA	12	22	****	FLG, TCHH, HRNR, NUP210L		BRCA, LUAD	BLCA
PSMD5	Proteasome 26S subunit, non-ATPase 5	-	9q33.2	ACC, KICH, KIRP, LIHC, LUAD, PCPG, SKCM, UCEC, ESCA, SARC, STAD, BRCA, GBM, LGG, HNSC, OV, PRAD	0	5		CDK5RAP2
PSMD6	Proteasome 26S subunit, non-ATPase 6	Rpn7	3p14.1	BLCA, ESCA, HNSC, TGCT, UCS, LGG, PCPG, UCEC, LUAD, PRAD, STAD, SKCM, OV	1	5				STAD	SKCM
PSMD7	Proteasome 26S subunit, non-ATPase 7	Rpn8	16q23.1	CESC, COAD, READ, KIRP, OV, PAAD, SKCM, LGG, BRCA, LUAD, STAD, UCEC, BLCA	0	3
PSMD8	Proteasome 26S subunit, non-ATPase 8	Rpn12	19q13.2	LIHC, MESO, PCPG, SKCM, COAD, READ, GBM, LGG, PRAD, HNSC, ESCA, STAD, SARC, LUAD, UCS, PAAD, CESC, UCEC, BLCA, BRCA, LUSC, OV	3	7		NUMBL, CIC, POU2F2, ERF		ESCA, LUSC	BLCA
PSMD9	Proteasome 26S subunit, non-ATPase 9	-	12q24.31	ACC, ESCA, GBM, HNSC, KIRP, LUSC, PCPG, SKCM, STAD, BLCA, BRCA, SARC, UCEC, LGG, PRAD, OV	0	8		HNF1A, SETD1B, CLIP1, KNTC1, NCOR2
PSMD10	Proteasome 26S subunit, non-ATPase 10	Gankyrin	Xq22.3	BLCA, BRCA, COAD, READ, KIRP, LIHC, PAAD, THCA, UCEC, ESCA, SARC, SKCM, HNSC, STAD, LGG, LUSC, OV, KIRC	1	2		TEX13A
PSMD11	Proteasome 26S subunit, non-ATPase 11	Rpn6	17q11.2	CESC, CHOL, HNSC, KIRC, OV, SKCM, THCA, UCS, LUSC, SARC, THYM, COAD, READ, ESCA, PAAD, LIHC, LUAD, UCEC, STAD, BLCA, BRCA	3	8		TAOK1, NF1			BLCA, BRCA, CHOL
PSMD12	Proteasome 26S subunit, non-ATPase 12	Rpn5	17q24.2	ACC, GBM, KIRC, LAML, THCA, UCS, UVM, HNSC, PCPG, THYM, ESCA, PAAD, PRAD, CESC, MESO, SARC, STAD, LUSC, BLCA, COAD, READ, LGG, OV, UCEC, LUAD, SKCM, LIHC, BRCA	0	8					BRCA
PSMD13	Proteasome 26S subunit, non-ATPase 13	Rpn9	11p15.5	GBM, KIRC, LIHC, LUAD, LUSC, PAAD, SARC, SKCM, UCS, BRCA, LGG, PCPG, HNSC, UCEC, OV, STAD	2	2		HRAS, PHRF1			UCS
PSMD14	Proteasome 26S subunit, non-ATPase 14	Rpn11	2q24.2	ESCA, GBM, LUAD, PRAD, UCEC, UCS, HNSC, PAAD, SARC, LIHC, LUSC, BLCA, OV	0	5					BLCA
Class III: Proteasome activator
PSME1	Proteasome activator subunit 1	PA28α	14q12	KIRP, PRAD, STAD, THYM, UCS, ACC, ESCA, SKCM, HNSC, UCEC, LIHC, LUSC, SARC, OV, LGG, BLCA, BRCA, LUAD	0	5		ARHGAP5		SARC
PSME2	Proteasome activator subunit 2	PA28β	14q12	KIRP, PRAD, STAD, THYM, UCS, ACC, ESCA, SKCM, HNSC, UCEC, LIHC, LUSC, SARC, OV, LGG, BLCA, BRCA, LUAD	0	5		ARHGAP5			BRCA
PSME3	Proteasome activator subunit 3	PA28γ	17q21.31	ESCA, HNSC, KIRC, LUSC, MESO, OV, PCPG, SKCM, THCA, THYM, BLCA, COAD, READ, LUAD, PAAD, UCEC, LIHC, STAD, BRCA	1	8		BRCA1			BRCA
PSME4	Proteasome activator subunit 4	PA200	2p16.2	SARC, THYM, DLBC, HNSC, SKCM, PRAD, LUAD, BLCA, BRCA, LUSC, OV	0	4
Class IV: Proteasome inhibitor
PSMF1	Proteasome inhibitor subunit 1	PI31	20p13	BLCA, KIRP, PAAD, BRCA, COAD, READ, ESCA, GBM, LGG, LIHC, PRAD, LUAD, UCEC, SARC, STAD, LUSC, OV	2	18					SARC
Class V: Proteasome assembly chaperone
PSMG1	Proteasome Assembly Chaperone 1		21q22.2	HNSC, PCPG, PRAD, SKCM, STAD, THYM, UCEC, UCS, UVM, LUSC, BLCA, CESC, SARC, LUAD, OV, LAML, BRCA	2	5				BLCA
PSMG2	Proteasome Assembly Chaperone 2		18p11.21	KIRC, LGG, PCPG, SARC, UCS, COAD, READ, ESCA, LIHC, BRCA, CESC, LUAD, PAAD, LUSC, OV, UCEC, HNSC, STAD, BLCA	0	1
PSMG3	Proteasome Assembly Chaperone 3		7p22.3	CESC, COAD, READ, DLBC, LGG, PCPG, TGCT, KIRC, LIHC, MESO, PRAD, UCS, ACC, PAAD, UCEC, SARC, LUSC, BRCA, GBM, HNSC, OV, SKCM, ESCA, BLCA, STAD, LUAD	1	22				LUAD
PSMG4	Proteasome Assembly Chaperone 4		6p25.2	CHOL, GBM, HNSC, LAML, PRAD, UCS, CESC, DLBC, LGG, LUSC, MESO, UVM, BLCA, LUAD, BRCA, UCEC, LIHC, SKCM, OV	1	5
Data obtained from aGomes AV et al., bGenome Reference Consortium Human GRCh38.p12/hg38, cBroad GDAC Firehose (GISTIC2), dAmplification status (classified as amplification according to AMP and no amplification for all other genetic alterations in cBioPortal) was matched with gene expression patterns retrieved from Broad GDAC Firehose. Wilcoxon test was used to calculate statistical significance (…
