# Supplementary material for: Pan-cancer analysis of genomic and transcriptomic data reveals the prognostic relevance of human proteasome genes in different cancer types
Source: BMC Cancer. 2022 Sep 19;22:993. doi: 10.1186/s12885-022-10079-4 (PMC9484138; doi:10.1186/s12885-022-10079-4)
Supplement: Supplementary file 5 — Additional file 5: Supplementary Table 3. Amplification and deletion of the 49 human proteasome gene family members in breast cancer. [file 12885_2022_10079_MOESM5_ESM.xlsx]

## Sheet: Sheet1
Supplementary Table 3. Amplification and deletion of the 49 human proteasome gene family members in breast cancer
Gene symbol	N samples	Amplified (log2ratio > 0.5)	Percent amplified	Deletions (log2ratio < -1)	Percent deletions
PSMA1	229	0	0	0	0
PSMA2	229	1	0.436681	0	0
PSMA3	229	0	0	0	0
PSMA4	229	1	0.436681	0	0
PSMA6	229	2	0.873362	0	0
PSMA7	229	27	11.7904	0	0
PSMA8	229	5	2.18341	0	0
PSMB1	229	3	1.31004	0	0
PSMB10	229	5	2.18341	0	0
PSMB2	229	2	0.873362	0	0
PSMB3	229	13	5.67686	0	0
PSMB4	229	24	10.4803	0	0
PSMB5	229	3	1.31004	0	0
PSMB6	229	3	1.31004	0	0
PSMB8, PSMB9	229	3	1.31004	0	0
PSMC1	229	0	0	0	0
PSMC2	229	0	0	0	0
PSMC3	229	1	0.436681	0	0
PSMC3IP	229	3	1.31004	0	0
PSMC4	229	11	4.80349	0	0
PSMC6	229	1	0.436681	0	0
PSMD1	229	0	0	0	0
PSMD10	229	76	33.1878	0	0
PSMD11	229	7	3.05677	0	0
PSMD13	229	3	1.31004	0	0
PSMD2	229	23	10.0437	0	0
PSMD3	229	24	10.4803	0	0
PSMD4	229	36	15.7205	0	0
PSMD5	229	2	0.873362	0	0
PSMD6	229	0	0	0	0
PSMD7	229	2	0.873362	0	0
PSMD8	229	14	6.11354	0	0
PSMD9	229	4	1.74672	0	0
PSME1	229	9	3.93013	0	0
PSME3	229	6	2.62009	0	0
PSME4	229	1	0.436681	0	0
PSMF1	229	3	1.31004	0	0
PSMG1	229	1	0.436681	0	0
PSMG3	229	3	1.31004	0	0
