# Supplementary material for: Pan-cancer analysis of genomic and transcriptomic data reveals the prognostic relevance of human proteasome genes in different cancer types
Source: BMC Cancer. 2022 Sep 19;22:993. doi: 10.1186/s12885-022-10079-4 (PMC9484138; doi:10.1186/s12885-022-10079-4)
Supplement: Supplementary file 6 — Additional file 6. Supplementary Table 4. Mutations in the 49 PSM genes across TCGA samples. [file 12885_2022_10079_MOESM6_ESM.xlsx]

## Sheet: Supplementary Table 4
Supplementary Table 4. Mutations in the 49 PSM genes across TCGA samples
Gene	Study of Origin	Sample ID	TCGA	Cancer Type	Cancer Type Detailed	Protein Change	Spearman correlation (co-expression with fusion partner)a	Annotation	Functional Impact	MutationAssessor	SIFT	Polyphen-2	Polyphen-2 score	Mutation Type	Variant Type	Copy
PSMA1	Ovarian Serous Cystadenocarcinoma (TCGA, PanCancer Atlas)	TCGA-24-2267-01	OV	Ovarian Epithelial Tumor	Serous Ovarian Cancer	MAP2K2-PSMA1		OncoKB: Unknown, level NA, resistance NA;CIViC: NA;MyCancerGenome: not present;CancerHotspot: no;3DHotspot: no	MutationAssessor: NA;SIFT: NA;Polyphen-2: NA	MutationAssessor: NA	SIFT: NA	Polyphen-2: NA		fusion	FUSION	ShallowDel
PSMA1	Lung Squamous Cell Carcinoma (TCGA, PanCancer Atlas)	TCGA-85-6560-01	LUSC	Non-Small Cell Lung Cancer	Lung Squamous Cell Carcinoma	GTF2H1-PSMA1		OncoKB: Unknown, level NA, resistance NA;CIViC: NA;MyCancerGenome: not present;CancerHotspot: no;3DHotspot: no	MutationAssessor: NA;SIFT: NA;Polyphen-2: NA	MutationAssessor: NA	SIFT: NA	Polyphen-2: NA		fusion	FUSION	Gain
PSMA1	Stomach Adenocarcinoma (TCGA, PanCancer Atlas)	TCGA-MX-A666-01	STAD	Esophagogastric Adenocarcinoma	Stomach Adenocarcinoma	KCNQ1OT1-PSMA1		OncoKB: Unknown, level NA, resistance NA;CIViC: NA;MyCancerGenome: not present;CancerHotspot: no;3DHotspot: no	MutationAssessor: NA;SIFT: NA;Polyphen-2: NA	MutationAssessor: NA	SIFT: NA	Polyphen-2: NA		fusion	FUSION	Gain
PSMA1	Skin Cutaneous Melanoma (TCGA, PanCancer Atlas)	TCGA-DA-A1HW-06	SKCM	Melanoma	Cutaneous Melanoma	PSMA1-SERGEF		OncoKB: Unknown, level NA, resistance NA;CIViC: NA;MyCancerGenome: not present;CancerHotspot: no;3DHotspot: no	MutationAssessor: NA;SIFT: NA;Polyphen-2: NA	MutationAssessor: NA	SIFT: NA	Polyphen-2: NA		fusion	FUSION	ShallowDel
PSMA1	Skin Cutaneous Melanoma (TCGA, PanCancer Atlas)	TCGA-FS-A1ZJ-06	SKCM	Melanoma	Cutaneous Melanoma	ATAD5-PSMA1		OncoKB: Unknown, level NA, resistance NA;CIViC: NA;MyCancerGenome: not present;CancerHotspot: no;3DHotspot: no	MutationAssessor: NA;SIFT: NA;Polyphen-2: NA	MutationAssessor: NA	SIFT: NA	Polyphen-2: NA		fusion	FUSION	Diploid
PSMA1	Uterine Carcinosarcoma (TCGA, PanCancer Atlas)	TCGA-QM-A5NM-01	UCS	Endometrial Carcinoma	Uterine Carcinosarcoma/Uterine Malignant Mixed Mullerian Tumor	N147S		OncoKB: NA;CIViC: NA;MyCancerGenome: not present;CancerHotspot: no;3DHotspot: no	MutationAssessor: NA;SIFT: NA;Polyphen-2: NA	MutationAssessor: NA	SIFT: NA	Polyphen-2: NA		Missense_Mutation	SNP	Diploid
PSMA1	Brain Lower Grade Glioma (TCGA, PanCancer Atlas)	TCGA-DU-6392-01	LGG	Diffuse Glioma	Astrocytoma	D224Y		OncoKB: NA;CIViC: NA;MyCancerGenome: not present;CancerHotspot: no;3DHotspot: no	MutationAssessor: NA;SIFT: impact: deleterious, score: 0;Polyphen-2: impact: possibly_damaging, score: 0.834	MutationAssessor: NA	SIFT: impact: deleterious, score: 0	Polyphen-2: impact: possibly_damaging	0.83	Missense_Mutation	SNP	Gain
PSMA1	Glioblastoma Multiforme (TCGA, PanCancer Atlas)	TCGA-06-5416-01	GBM	Glioblastoma	Glioblastoma Multiforme	M182L		OncoKB: NA;CIViC: NA;MyCancerGenome: not present;CancerHotspot: no;3DHotspot: no	MutationAssessor: NA;SIFT: impact: tolerated, score: 1;Polyphen-2: impact: benign, score: 0.001	MutationAssessor: NA	SIFT: impact: tolerated, score: 1	Polyphen-2: impact: benign	0	Missense_Mutation	SNP	Diploid
PSMA1	Lung Squamous Cell Carcinoma (TCGA, PanCancer Atlas)	TCGA-90-A4EE-01	LUSC	Non-Small Cell Lung Cancer	Lung Squamous Cell Carcinoma	D233N		OncoKB: NA;CIViC: NA;MyCancerGenome: not present;CancerHotspot: no;3DHotspot: no	MutationAssessor: NA;SIFT: impact: tolerated, score: 0.1;Polyphen-2: impact: benign, score: 0.009	MutationAssessor: NA	SIFT: impact: tolerated, score: 0.1	Polyphen-2: impact: benign	0.01	Missense_Mutation	SNP	Gain
PSMA1	Lung Squamous Cell Carcinoma (TCGA, PanCancer Atlas)	TCGA-85-8664-01	LUSC	Non-Small Cell Lung Cancer	Lung Squamous Cell Carcinoma	M165I		OncoKB: NA;CIViC: NA;MyCancerGenome: not present;CancerHotspot: no;3DHotspot: no	MutationAssessor: NA;SIFT: impact: tolerated, score: 0.18;Polyphen-2: impact: possibly_damaging, score: 0.7	MutationAssessor: NA	SIFT: impact: tolerated, score: 0.18	Polyphen-2: impact: possibly_damaging	0.7	Missense_Mutation	SNP	Diploid
PSMA1	Lung Squamous Cell Carcinoma (TCGA, PanCancer Atlas)	TCGA-94-8490-01	LUSC	Non-Small Cell Lung Cancer	Lung Squamous Cell Carcinoma	I28N		OncoKB: NA;CIViC: NA;MyCancerGenome: not present;CancerHotspot: no;3DHotspot: no	MutationAssessor: NA;SIFT: impact: deleterious, score: 0;Polyphen-2: impact: probably_damaging, score: 0.947	MutationAssessor: NA	SIFT: impact: deleterious, score: 0	Polyphen-2: impact: probably_damaging	0.95	Missense_Mutation	SNP	ShallowDel
PSMA1	Lung Squamous Cell Carcinoma (TCGA, PanCancer Atlas)	TCGA-63-A5MT-01	LUSC	Non-Small Cell Lung Cancer	Lung Squamous Cell Carcinoma	R245T		OncoKB: NA;CIViC: NA;MyCancerGenome: not present;CancerHotspot: no;3DHotspot: no	MutationAssessor: NA;SIFT: impact: tolerated, score: 0.25;Polyphen-2: impact: benign, score: 0.007	MutationAssessor: NA	SIFT: impact: tolerated, score: 0.25	Polyphen-2: impact: benign	0.01	Missense_Mutation	SNP	Amp
PSMA1	Bladder Urothelial Carcinoma (TCGA, PanCancer Atlas)	TCGA-FD-A3SS-01	BLCA	Bladder Urothelial Carcinoma	Bladder Urothelial Carcinoma	D233N		OncoKB: NA;CIViC: NA;MyCancerGenome: not present;CancerHotspot: no;3DHotspot: no	MutationAssessor: NA;SIFT: impact: tolerated, score: 0.1;Polyphen-2: impact: benign, score: 0.009	MutationAssessor: NA	SIFT: impact: tolerated, score: 0.1	Polyphen-2: impact: benign	0.01	Missense_Mutation	SNP	ShallowDel
PSMA1	Bladder Urothelial Carcinoma (TCGA, PanCancer Atlas)	TCGA-FD-A6TC-01	BLCA	Bladder Urothelial Carcinoma	Bladder Urothelial Carcinoma	V194L		OncoKB: NA;CIViC: NA;MyCancerGenome: not present;CancerHotspot: no;3DHotspot: no	MutationAssessor: NA;SIFT: impact: tolerated, score: 0.05;Polyphen-2: impact: benign, score: 0.017	MutationAssessor: NA	SIFT: impact: tolerated, score: 0.05	Polyphen-2: impact: benign	0.02	Missense_Mutation	SNP	ShallowDel
PSMA1	Bladder Urothelial Carcinoma (TCGA, PanCancer Atlas)	TCGA-XF-AAN2-01	BLCA	Bladder Urothelial Carcinoma	Bladder Urothelial Carcinoma	E258Q		OncoKB: NA;CIViC: NA;MyCancerGenome: not present;CancerHotspot: no;3DHotspot: no	MutationAssessor: NA;SIFT: impact: tolerated, score: 0.26;Polyphen-2: impact: possibly_damaging, score: 0.775	MutationAssessor: NA	SIFT: impact: tolerated, score: 0.26	Polyphen-2: impact: possibly_damaging	0.78	Missense_Mutation	SNP	Diploid
PSMA1	Liver Hepatocellular Carcinoma (TCGA, PanCancer Atlas)	TCGA-K7-A6G5-01	LIHC	Hepatocellular Carcinoma	Hepatocellular Carcinoma	L138V		OncoKB: NA;CIViC: NA;MyCancerGenome: not present;CancerHotspot: no;3DHotspot: no	MutationAssessor: NA;SIFT: impact: deleterious, score: 0.01;Polyphen-2: impact: possibly_damaging, score: 0.668	MutationAssessor: NA	SIFT: impact: deleterious, score: 0.01	Polyphen-2: impact: possibly_damaging	0.67	Missense_Mutation	SNP	Diploid
PSMA1	Liver Hepatocellular Carcinoma (TCGA, PanCancer Atlas)	TCGA-DD-AAEH-01	LIHC	Hepatocellular Carcinoma	Hepatocellular Carcinoma	I80V		OncoKB: NA;CIViC: NA;MyCancerGenome: not present;CancerHotspot: no;3DHotspot: no	MutationAssessor: NA;SIFT: impact: deleterious, score: 0.03;Polyphen-2: impact: benign, score: 0.04	MutationAssessor: NA	SIFT: impact: deleterious, score: 0.03	Polyphen-2: impact: benign	0.04	Missense_Mutation	SNP	Diploid
PSMA1	Prostate Adenocarcinoma (TCGA, PanCancer Atlas)	TCGA-XK-AAIW-01	PRAD	Prostate Adenocarcinoma	Prostate Adenocarcinoma	M32V		OncoKB: NA;CIViC: NA;MyCancerGenome: not present;CancerHotspot: no;3DHotspot: no	MutationAssessor: NA;SIFT: impact: tolerated, score: 0.09;Polyphen-2: impact: benign, score: 0.253	MutationAssessor: NA	SIFT: impact: tolerated, score: 0.09	Polyphen-2: impact: benign	0.25	Missense_Mutation	SNP	Diploid
PSMA1	Uterine Corpus Endometrial Carcinoma (TCGA, PanCancer Atlas)	TCGA-D1-A17Q-01	UCEC	Endometrial Carcinoma	Uterine Endometrioid Carcinoma	R9*		OncoKB: NA;CIViC: NA;MyCancerGenome: not present;CancerHotspot: no;3DHotspot: no	MutationAssessor: NA;SIFT: NA;Polyphen-2: NA	MutationAssessor: NA	SIFT: NA	Polyphen-2: NA		Nonsense_Mutation	SNP	Diploid
PSMA1	Uterine Corpus Endometrial Carcinoma (TCGA, PanCancer Atlas)	TCGA-EO-A22X-01	UCEC	Endometrial Carcinoma	Uterine Endometrioid Carcinoma	R9*		OncoKB: NA;CIViC: NA;MyCancerGenome: not present;CancerHotspot: no;3DHotspot: no	MutationAssessor: NA;SIFT: NA;Polyphen-2: NA	MutationAssessor: NA	SIFT: NA	Polyphen-2: NA		Nonsense_Mutation	SNP	Diploid
PSMA1	Uterine Corpus Endometrial Carcinoma (TCGA, PanCancer Atlas)	TCGA-AP-A0LM-01	UCEC	Endometrial Carcinoma	Uterine Endometrioid Carcinoma	A81V		OncoKB: NA;CIViC: NA;MyCancerGenome: not present;CancerHotspot: no;3DHotspot: no	MutationAssessor: NA;SIFT: impact: deleterious, score: 0;Polyphen-2: impact: probably_damaging, score: 0.939	MutationAssessor: NA	SIFT: impact: deleterious, score: 0	Polyphen-2: impact: probably_damaging	0.94	Missense_Mutation	SNP	Diploid
PSMA1	Uterine Corpus Endometrial Carcinoma (TCGA, PanCancer Atlas)	TCGA-AP-A051-01	UCEC	Endometrial Carcinoma	Uterine Endometrioid Carcinoma	R128*		OncoKB: NA;CIViC: NA;MyCancerGenome: not present;CancerHotspot: no;3DHotspot: no	MutationAssessor: NA;SIFT: NA;Polyphen-2: NA	MutationAssessor: NA	SIFT: NA	Polyphen-2: NA		Nonsense_Mutation	SNP	Diploid
PSMA1	Uterine Corpus Endometrial Carcinoma (TCGA, PanCancer Atlas)	TCGA-B5-A11E-01	UCEC	Endometrial Carcinoma	Uterine Endometrioid Carcinoma	R128*		OncoKB: NA;CIViC: NA;MyCancerGenome: not present;CancerHotspot: no;3DHotspot: no	MutationAssessor: NA;SIFT: NA;Polyphen-2: NA	MutationAssessor: NA	SIFT: NA	Polyphen-2: NA		Nonsense_Mutation	SNP	Diploid
PSMA1	Uterine Corpus Endometrial Carcinoma (TCGA, PanCancer Atlas)	TCGA-AX-A060-01	UCEC	Endometrial Carcinoma	Uterine Endometrioid Carcinoma	I69Ffs*49		OncoKB: NA;CIViC: NA;MyCancerGenome: not present;CancerHotspot: no;3DHotspot: no	MutationAssessor: NA;SIFT: NA;Polyphen-2: NA	MutationAssessor: NA	SIFT: NA	Polyphen-2: NA		Frame_Shift_Del	DEL	Diploid
PSMA1	Uterine Corpus Endometrial Carcinoma (TCGA, PanCancer Atlas)	TCGA-AX-A063-01	UCEC	Endometrial Carcinoma	Uterine Endometrioid Carcinoma	I78N		OncoKB: NA;CIViC: NA;MyCancerGenome: not present;CancerHotspot: no;3DHotspot: no	MutationAssessor: NA;SIFT: impact: deleterious, score: 0;Polyphen-2: impact: possibly_damaging, score: 0.902	MutationAssessor: NA	SIFT: impact: deleterious, score: 0	Polyphen-2: impact: possibly_damaging	0.9	Missense_Mutation	SNP	Diploid
PSMA1	Uterine Corpus Endometrial Carcinoma (TCGA, PanCancer Atlas)	TCGA-AX-A2HC-01	UCEC	Endometrial Carcinoma	Uterine Endometrioid Carcinoma	L52V		OncoKB: NA;CIViC: NA;MyCancerGenome: not present;CancerHotspot: no;3DHotspot: no	MutationAssessor: NA;SIFT: impact: deleterious, score: 0.03;Polyphen-2: impact: benign, score: 0.236	MutationAssessor: NA	SIFT: impact: deleterious, score: 0.03	Polyphen-2: impact: benign	0.24	Missense_Mutation	SNP	Diploid
PSMA1	Uterine Corpus Endometrial Carcinoma (TCGA, PanCancer Atlas)	TCGA-AX-A2HD-01	UCEC	Endometrial Carcinoma	Uterine Endometrioid Carcinoma	A31P		OncoKB: NA;CIViC: NA;MyCancerGenome: not present;CancerHotspot: no;3DHotspot: no	MutationAssessor: NA;SIFT: impact: deleterious, score: 0;Polyphen-2: impact: probably_damaging, score: 0.997	MutationAssessor: NA	SIFT: impact: deleterious, score: 0	Polyphen-2: impact: probably_damaging	1	Missense_Mutation	SNP	Diploid
PSMA1	Uterine Corpus Endometrial Carcinoma (TCGA, PanCancer Atlas)	TCGA-B5-A11E-01	UCEC	Endometrial Carcinoma	Uterine Endometrioid Carcinoma	F93C		OncoKB: NA;CIViC: NA;MyCancerGenome: not present;CancerHotspot: no;3DHotspot: no	MutationAssessor: NA;SIFT: impact: deleterious, score: 0;Polyphen-2: impact: probably_damaging, score: 0.974	MutationAssessor: NA	SIFT: impact: deleterious, score: 0	Polyphen-2: impact: probably_damaging	0.97	Missense_Mutation	SNP	Diploid
PSMA1	Uterine Corpus Endometrial Carcinoma (TCGA, PanCancer Atlas)	TCGA-B5-A1MX-01	UCEC	Endometrial Carcinoma	Uterine Endometrioid Carcinoma	Q251R		OncoKB: NA;CIViC: NA;MyCancerGenome: not present;CancerHotspot: no;3DHotspot: no	MutationAssessor: NA;SIFT: impact: tolerated, score: 0.51;Polyphen-2: impact: benign, score: 0	MutationAssessor: NA	SIFT: impact: tolerated, score: 0.51	Polyphen-2: impact: benign	0	Missense_Mutation	SNP	Diploid
PSMA1	Uterine Corpus Endometrial Carcinoma (TCGA, PanCancer Atlas)	TCGA-BG-A0MK-01	UCEC	Endometrial Carcinoma	Uterine Endometrioid Carcinoma	D233G		OncoKB: NA;CIViC: NA;MyCancerGenome: not present;CancerHotspot: no;3DHotspot: no	MutationAssessor: NA;SIFT: impact: tolerated, score: 0.06;Polyphen-2: impact: benign, score: 0.005	MutationAssessor: NA	SIFT: impact: tolerated, score: 0.06	Polyphen-2: impact: benign	0.01	Missense_Mutation	SNP	Diploid
PSMA1	Uterine Corpus Endometrial Carcinoma (TCGA, PanCancer Atlas)	TCGA-DF-A2KU-01	UCEC	Endometrial Carcinoma	Uterine Endometrioid Carcinoma	P133T		OncoKB: NA;CIViC: NA;MyCancerGenome: not present;CancerHotspot: no;3DHotspot: no	MutationAssessor: NA;SIFT: impact: deleterious, score: 0;Polyphen-2: impact: probably_damaging, score: 0.999	MutationAssessor: NA	SIFT: impact: deleterious, score: 0	Polyphen-2: impact: probably_damaging	1	Missense_Mutation	SNP	Diploid
PSMA1	Uterine Corpus Endometrial Carcinoma (TCGA, PanCancer Atlas)	TCGA-DI-A1BU-01	UCEC	Endometrial Carcinoma	Uterine Mixed Endometrial Carcinoma	Q152R		OncoKB: NA;CIViC: NA;MyCancerGenome: not present;CancerHotspot: no;3DHotspot: no	MutationAssessor: NA;SIFT: impact: deleterious, score: 0.02;Polyphen-2: impact: probably_damaging, score: 0.992	MutationAssessor: NA	SIFT: impact: deleterious, score: 0.02	Polyphen-2: impact: probably_damaging	0.99	Missense_Mutation	SNP	Diploid
PSMA1	Uterine Corpus Endometrial Carcinoma (TCGA, PanCancer Atlas)	TCGA-EO-A3KX-01	UCEC	Endometrial Carcinoma	Uterine Endometrioid Carcinoma	I69Nfs*5		OncoKB: NA;CIViC: NA;MyCancerGenome: not present;CancerHotspot: no;3DHotspot: no	MutationAssessor: NA;SIFT: NA;Polyphen-2: NA	MutationAssessor: NA	SIFT: NA	Polyphen-2: NA		Frame_Shift_Ins	INS	Diploid
PSMA1	Uterine Corpus Endometrial Carcinoma (TCGA, PanCancer Atlas)	TCGA-EY-A215-01	UCEC	Endometrial Carcinoma	Uterine Endometrioid Carcinoma	A81T		OncoKB: NA;CIViC: NA;MyCancerGenome: not present;CancerHotspot: no;3DHotspot: no	MutationAssessor: NA;SIFT: impact: deleterious, score: 0.05;Polyphen-2: impact: possibly_damaging, score: 0.617	MutationAssessor: NA	SIFT: impact: deleterious, score: 0.05	Polyphen-2: impact: possibly_damaging	0.62	Missense_Mutation	SNP	Diploid
PSMA1	Lung Adenocarcinoma (TCGA, PanCancer Atlas)	TCGA-L9-A5IP-01	LUAD	Non-Small Cell Lung Cancer	Lung Adenocarcinoma	S4R		OncoKB: NA;CIViC: NA;MyCancerGenome: not present;CancerHotspot: no;3DHotspot: no	MutationAssessor: NA;SIFT: impact: tolerated_low_confidence, score: 0.53;Polyphen-2: impact: benign, score: 0	MutationAssessor: NA	SIFT: impact: tolerated_low_confidence, score: 0.53	Polyphen-2: impact: benign	0	Missense_Mutation	SNP	Diploid
PSMA1	Lung Adenocarcinoma (TCGA, PanCancer Atlas)	TCGA-93-7347-01	LUAD	Non-Small Cell Lung Cancer	Lung Adenocarcinoma	M267V		OncoKB: NA;CIViC: NA;MyCancerGenome: not present;CancerHotspot: no;3DHotspot: no	MutationAssessor: NA;SIFT: impact: deleterious, score: 0.02;Polyphen-2: impact: benign, score: 0.019	MutationAssessor: NA	SIFT: impact: deleterious, score: 0.02	Polyphen-2: impact: benign	0.02	Missense_Mutation	SNP	Diploid
PSMA1	Lung Adenocarcinoma (TCGA, PanCancer Atlas)	TCGA-55-8514-01	LUAD	Non-Small Cell Lung Cancer	Lung Adenocarcinoma	R107I		OncoKB: NA;CIViC: NA;MyCancerGenome: not present;CancerHotspot: no;3DHotspot: no	MutationAssessor: NA;SIFT: impact: deleterious, score: 0.02;Polyphen-2: impact: benign, score: 0.197	MutationAssessor: NA	SIFT: impact: deleterious, score: 0.02	Polyphen-2: impact: benign	0.2	Missense_Mutation	SNP	Gain
PSMA1	Lung Adenocarcinoma (TCGA, PanCancer Atlas)	TCGA-69-8255-01	LUAD	Non-Small Cell Lung Cancer	Lung Adenocarcinoma	D100H		OncoKB: NA;CIViC: NA;MyCancerGenome: not present;CancerHotspot: no;3DHotspot: no	MutationAssessor: NA;SIFT: impact: tolerated, score: 0.09;Polyphen-2: impact: benign, score: 0.007	MutationAssessor: NA	SIFT: impact: tolerated, score: 0.09	Polyphen-2: impact: benign	0.01	Missense_Mutation	SNP	Diploid
PSMA1	Lung Adenocarcinoma (TCGA, PanCancer Atlas)	TCGA-MN-A4N5-01	LUAD	Non-Small Cell Lung Cancer	Lung Adenocarcinoma	D86Y		OncoKB: NA;CIViC: NA;MyCancerGenome: not present;CancerHotspot: no;3DHotspot: no	MutationAssessor: NA;SIFT: impact: deleterious, score: 0;Polyphen-2: impact: probably_damaging, score: 1	MutationAssessor: NA	SIFT: impact: deleterious, score: 0	Polyphen-2: impact: probably_damaging	1	Missense_Mutation	SNP	Diploid
PSMA1	Lung Adenocarcinoma (TCGA, PanCancer Atlas)	TCGA-53-7626-01	LUAD	Non-Small Cell Lung Cancer	Lung Adenocarcinoma	L178F		OncoKB: NA;CIViC: NA;MyCancerGenome: not present;CancerHotspot: no;3DHotspot: no	MutationAssessor: NA;SIFT: impact: deleterious, score: 0.01;Polyphen-2: impact: probably_damaging, score: 0.997	MutationAssessor: NA	SIFT: impact: deleterious, score: 0.01	Polyphen-2: impact: probably_damaging	1	Missense_Mutation	SNP	ShallowDel
PSMA1	Lung Adenocarcinoma (TCGA, PanCancer Atlas)	TCGA-MN-A4N5-01	LUAD	Non-Small Cell Lung Cancer	Lung Adenocarcinoma	X119_splice		OncoKB: NA;CIViC: NA;MyCancerGenome: not present;CancerHotspot: no;3DHotspot: no	MutationAssessor: NA;SIFT: NA;Polyphen-2: NA	MutationAssessor: NA	SIFT: impact: deleterious, score: 0	Polyphen-2: impact: probably_damaging	score: 0.984	Splice_Site	SNP	Diploid
PSMA1	Skin Cutaneous Melanoma (TCGA, PanCancer Atlas)	TCGA-EE-A2MU-06	SKCM	Melanoma	Cutaneous Melanoma	S160F		OncoKB: NA;CIViC: NA;MyCancerGenome: not present;CancerHotspot: no;3DHotspot: no	MutationAssessor: NA;SIFT: impact: deleterious, score: 0;Polyphen-2: impact: probably_damaging, score: 0.984	MutationAssessor: NA	SIFT: impact: deleterious, score: 0.02	Polyphen-2: impact: probably_damaging	0.93	Missense_Mutation	SNP	ShallowDel
PSMA1	Skin Cutaneous Melanoma (TCGA, PanCancer Atlas)	TCGA-EE-A3AG-06	SKCM	Melanoma	Cutaneous Melanoma	P249L		OncoKB: NA;CIViC: NA;MyCancerGenome: not present;CancerHotspot: no;3DHotspot: no	MutationAssessor: NA;SIFT: impact: deleterious, score: 0.02;Polyphen-2: impact: probably_damaging, score: 0.927	MutationAssessor: NA	SIFT: impact: deleterious, score: 0.05	Polyphen-2: impact: benign	0.02	Missense_Mutation	SNP	Diploid
PSMA1	Skin Cutaneous Melanoma (TCGA, PanCancer Atlas)	TCGA-D3-A2JA-06	SKCM	Melanoma	Cutaneous Melanoma	P231L		OncoKB: NA;CIViC: NA;MyCancerGenome: not present;CancerHotspot: no;3DHotspot: no	MutationAssessor: NA;SIFT: impact: deleterious, score: 0.05;Polyphen-2: impact: benign, score: 0.021	MutationAssessor: NA	SIFT: impact: deleterious, score: 0.01	Polyphen-2: impact: probably_damaging	1	Missense_Mutation	SNP	Diploid
PSMA1	Skin Cutaneous Melanoma (TCGA, PanCancer Atlas)	TCGA-D3-A2J6-06	SKCM	Melanoma	Cutaneous Melanoma	X182_splice		OncoKB: NA;CIViC: NA;MyCancerGenome: not present;CancerHotspot: no;3DHotspot: no	MutationAssessor: NA;SIFT: NA;Polyphen-2: NA	MutationAssessor: NA	SIFT: impact: tolerated, score: 0.1	Polyphen-2: impact: probably_damaging	score: 0.91	Splice_Site	SNP	ShallowDel
PSMA1	Skin Cutaneous Melanoma (TCGA, PanCancer Atlas)	TCGA-D3-A2JP-06	SKCM	Melanoma	Cutaneous Melanoma	X182_splice		OncoKB: NA;CIViC: NA;MyCancerGenome: not present;CancerHotspot: no;3DHotspot: no	MutationAssessor: NA;SIFT: NA;Polyphen-2: NA	MutationAssessor: NA	SIFT: impact: deleterious, score: 0	Polyphen-2: impact: probably_damaging	score: 0.909	Splice_Site	SNP	Gain
PSMA1	Skin Cutaneous Melanoma (TCGA, PanCancer Atlas)	TCGA-D3-A2J8-06	SKCM	Melanoma	Cutaneous Melanoma	L172F		OncoKB: NA;CIViC: NA;MyCancerGenome: not present;CancerHotspot: no;3DHotspot: no	MutationAssessor: NA;SIFT: impact: deleterious, score: 0.01;Polyphen-2: impact: probably_damaging, score: 0.997	MutationAssessor: NA	SIFT: impact: tolerated, score: 0.57	Polyphen-2: impact: benign	0	Missense_Mutation	SNP	Diploid
PSMA1	Skin Cutaneous Melanoma (TCGA, PanCancer Atlas)	TCGA-D3-A3C8-06	SKCM	Melanoma	Cutaneous Melanoma	P119Q		OncoKB: NA;CIViC: NA;MyCancerGenome: not present;CancerHotspot: no;3DHotspot: no	MutationAssessor: NA;SIFT: impact: tolerated, score: 0.1;Polyphen-2: impact: probably_damaging, score: 0.91	MutationAssessor: NA	SIFT: impact: deleterious, score: 0.04	Polyphen-2: impact: benign	0.35	Missense_Mutation	SNP	Diploid
PSMA1	Skin Cutaneous Melanoma (TCGA, PanCancer Atlas)	TCGA-FS-A1ZG-06	SKCM	Melanoma	Cutaneous Melanoma	X7_splice		OncoKB: NA;CIViC: NA;MyCancerGenome: not present;CancerHotspot: no;3DHotspot: no	MutationAssessor: NA;SIFT: NA;Polyphen-2: NA	MutationAssessor: NA	SIFT: impact: tolerated, score: 0.53	Polyphen-2: impact: benign	score: 0	Splice_Region	SNP	Diploid
PSMA1	Skin Cutaneous Melanoma (TCGA, PanCancer Atlas)	TCGA-GN-A266-06	SKCM	Melanoma	Cutaneous Melanoma	R51M		OncoKB: NA;CIViC: NA;MyCancerGenome: not present;CancerHotspot: no;3DHotspot: no	MutationAssessor: NA;SIFT: impact: deleterious, score: 0;Polyphen-2: impact: probably_damaging, score: 0.909	MutationAssessor: NA	SIFT: impact: tolerated, score: 1	Polyphen-2: impact: benign	0.01	Missense_Mutation	SNP	Gain
PSMA1	Stomach Adenocarcinoma (TCGA, PanCancer Atlas)	TCGA-CD-8536-01	STAD	Esophagogastric Adenocarcinoma	Stomach Adenocarcinoma	H71R		OncoKB: NA;CIViC: NA;MyCancerGenome: not present;CancerHotspot: no;3DHotspot: no	MutationAssessor: NA;SIFT: impact: tolerated, score: 0.57;Polyphen-2: impact: benign, score: 0.001	MutationAssessor: NA	SIFT: impact: tolerated, score: 0.62	Polyphen-2: impact: benign	0.01	Missense_Mutation	SNP	Diploid
PSMA1	Stomach Adenocarcinoma (TCGA, PanCancer Atlas)	TCGA-VQ-A8P2-01	STAD	Esophagogastric Adenocarcinoma	Mucinous Stomach Adenocarcinoma	R131W		OncoKB: NA;CIViC: NA;MyCancerGenome: not present;CancerHotspot: no;3DHotspot: no	MutationAssessor: NA;SIFT: impact: deleterious, score: 0.04;Polyphen-2: impact: benign, score: 0.348	MutationAssessor: NA	SIFT: impact: deleterious, score: 0.01	Polyphen-2: impact: possibly_damaging	0.65	Missense_Mutation	SNP	Diploid
PSMA1	Stomach Adenocarcinoma (TCGA, PanCancer Atlas)	TCGA-CG-5726-01	STAD	Esophagogastric Adenocarcinoma	Intestinal Type Stomach Adenocarcinoma	T228A		OncoKB: NA;CIViC: NA;MyCancerGenome: not present;CancerHotspot: no;3DHotspot: no	MutationAssessor: NA;SIFT: impact: tolerated, score: 0.53;Polyphen-2: impact: benign, score: 0	MutationAssessor: NA	SIFT: impact: tolerated, score: 0.11	Polyphen-2: impact: benign	0.01	Missense_Mutation	SNP	Diploid
PSMA1	Stomach Adenocarcinoma (TCGA, PanCancer Atlas)	TCGA-VQ-A91E-01	STAD	Esophagogastric Adenocarcinoma	Tubular Stomach Adenocarcinoma	I140V		OncoKB: NA;CIViC: NA;MyCancerGenome: not present;CancerHotspot: no;3DHotspot: no	MutationAssessor: NA;SIFT: impact: tolerated, score: 1;Polyphen-2: impact: benign, score: 0.006	MutationAssessor: NA	SIFT: impact: deleterious, score: 0	Polyphen-2: impact: benign	0.14	Missense_Mutation	SNP	Diploid
PSMA1	Breast Invasive Carcinoma (TCGA, PanCancer Atlas)	TCGA-AC-A2FO-01	BRCA	Invasive Breast Carcinoma	Breast Invasive Lobular Carcinoma	D106N		OncoKB: NA;CIViC: NA;MyCancerGenome: not present;CancerHotspot: no;3DHotspot: no	MutationAssessor: NA;SIFT: impact: tolerated, score: 0.62;Polyphen-2: impact: benign, score: 0.009	MutationAssessor: NA	SIFT: impact: deleterious, score: 0	Polyphen-2: impact: probably_damaging	0.93	Missense_Mutation	SNP	Diploid
PSMA1	Breast Invasive Carcinoma (TCGA, PanCancer Atlas)	TCGA-A2-A0CX-01	BRCA	Invasive Breast Carcinoma	Breast Invasive Ductal Carcinoma	Q66H		OncoKB: NA;CIViC: NA;MyCancerGenome: not present;CancerHotspot: no;3DHotspot: no	MutationAssessor: NA;SIFT: impact: deleterious, score: 0.01;Polyphen-2: impact: possibly_damaging, score: 0.651	MutationAssessor: NA	SIFT: impact: deleterious, score: 0	Polyphen-2: impact: possibly_damaging	0.89	Missense_Mutation	SNP	ShallowDel
PSMA1	Pancreatic Adenocarcinoma (TCGA, PanCancer Atlas)	TCGA-IB-7651-01	PAAD	Pancreatic Adenocarcinoma	Pancreatic Adenocarcinoma	M146V		OncoKB: NA;CIViC: NA;MyCancerGenome: not present;CancerHotspot: no;3DHotspot: no	MutationAssessor: NA;SIFT: impact: tolerated, score: 0.11;Polyphen-2: impact: benign, score: 0.005	MutationAssessor: NA	SIFT: impact: deleterious, score: 0.02	Polyphen-2: impact: benign	0.43	Missense_Mutation	SNP	Diploid
PSMA1	Pancreatic Adenocarcinoma (TCGA, PanCancer Atlas)	TCGA-FB-A78T-01	PAAD	Pancreatic Adenocarcinoma	Pancreatic Adenocarcinoma	R95H		OncoKB: NA;CIViC: NA;MyCancerGenome: not present;CancerHotspot: no;3DHotspot: no	MutationAssessor: NA;SIFT: impact: deleterious, score: 0;Polyphen-2: impact: benign, score: 0.144	MutationAssessor: NA	SIFT: NA	Polyphen-2: NA		Missense_Mutation	SNP	Diploid
PSMA1	Colorectal Adenocarcinoma (TCGA, PanCancer Atlas)	TCGA-AA-3984-01	COAD	Colorectal Adenocarcinoma	Colon Adenocarcinoma	R9Q		OncoKB: NA;CIViC: NA;MyCancerGenome: not present;CancerHotspot: no;3DHotspot: no	MutationAssessor: NA;SIFT: impact: deleterious, score: 0;Polyphen-2: impact: probably_damaging, score: 0.932	MutationAssessor: NA	SIFT: NA	Polyphen-2: NA		Missense_Mutation	SNP	Diploid
PSMA1	Colorectal Adenocarcinoma (TCGA, PanCancer Atlas)	TCGA-G4-6317-01	COAD	Colorectal Adenocarcinoma	Colon Adenocarcinoma	R95L		OncoKB: NA;CIViC: NA;MyCancerGenome: not present;CancerHotspot: no;3DHotspot: no	MutationAssessor: NA;SIFT: impact: deleterious, score: 0;Polyphen-2: impact: possibly_damaging, score: 0.888	MutationAssessor: NA	SIFT: impact: deleterious, score: 0.01	Polyphen-2: impact: benign	0.29	Missense_Mutation	SNP	ShallowDel
PSMA1	Colorectal Adenocarcinoma (TCGA, PanCancer Atlas)	TCGA-AG-A002-01	READ	Colorectal Adenocarcinoma	Rectal Adenocarcinoma	X188_splice		OncoKB: NA;CIViC: NA;MyCancerGenome: not present;CancerHotspot: no;3DHotspot: no	MutationAssessor: NA;SIFT: NA;Polyphen-2: NA	MutationAssessor: NA	SIFT: impact: tolerated, score: 1	Polyphen-2: impact: benign	score: 0.038	Splice_Site	SNP	Diploid
PSMA1	Kidney Renal Papillary Cell Carcinoma (TCGA, PanCancer Atlas)	TCGA-B9-A8YH-01	KIRP	Renal Non-Clear Cell Carcinoma	Papillary Renal Cell Carcinoma	P206L		OncoKB: NA;CIViC: NA;MyCancerGenome: not present;CancerHotspot: no;3DHotspot: no	MutationAssessor: NA;SIFT: impact: deleterious, score: 0.02;Polyphen-2: impact: benign, score: 0.427	MutationAssessor: NA	SIFT: impact: deleterious, score: 0.02	Polyphen-2: impact: probably_damaging	0.98	Missense_Mutation	SNP	Diploid
PSMA1	Kidney Renal Papillary Cell Carcinoma (TCGA, PanCancer Atlas)	TCGA-IA-A40U-01	KIRP	Renal Non-Clear Cell Carcinoma	Papillary Renal Cell Carcinoma	E97*		OncoKB: NA;CIViC: NA;MyCancerGenome: not present;CancerHotspot: no;3DHotspot: no	MutationAssessor: NA;SIFT: NA;Polyphen-2: NA	MutationAssessor: NA	SIFT: NA	Polyphen-2: NA		Nonsense_Mutation	SNP	Diploid
PSMA1	Head and Neck Squamous Cell Carcinoma (TCGA, PanCancer Atlas)	TCGA-CR-6473-01	HNSC	Head and Neck Squamous Cell Carcinoma	Head and Neck Squamous Cell Carcinoma	K7*		OncoKB: NA;CIViC: NA;MyCancerGenome: not present;CancerHotspot: no;3DHotspot: no	MutationAssessor: NA;SIFT: NA;Polyphen-2: NA	MutationAssessor: NA	SIFT: NA	Polyphen-2: NA		Nonsense_Mutation	SNP	Diploid
PSMA1	Head and Neck Squamous Cell Carcinoma (TCGA, PanCancer Atlas)	TCGA-H7-7774-01	HNSC	Head and Neck Squamous Cell Carcinoma	Head and Neck Squamous Cell Carcinoma	E268K		OncoKB: NA;CIViC: NA;MyCancerGenome: not present;CancerHotspot: no;3DHotspot: no	MutationAssessor: NA;SIFT: impact: deleterious, score: 0.01;Polyphen-2: impact: benign, score: 0.292	MutationAssessor: NA	SIFT: NA	Polyphen-2: NA		Missense_Mutation	SNP	Diploid
PSMA1	Head and Neck Squamous Cell Carcinoma (TCGA, PanCancer Atlas)	TCGA-CV-A45W-01	HNSC	Head and Neck Squamous Cell Carcinoma	Head and Neck Squamous Cell Carcinoma	A64S		OncoKB: NA;CIViC: NA;MyCancerGenome: not present;CancerHotspot: no;3DHotspot: no	MutationAssessor: NA;SIFT: impact: tolerated, score: 1;Polyphen-2: impact: benign, score: 0.038	MutationAssessor: NA	SIFT: impact: tolerated, score: 0.53	Polyphen-2: impact: benign	0.15	Missense_Mutation	SNP	Diploid
PSMA1	Head and Neck Squamous Cell Carcinoma (TCGA, PanCancer Atlas)	TCGA-CV-6955-01	HNSC	Head and Neck Squamous Cell Carcinoma	Head and Neck Squamous Cell Carcinoma	N10S		OncoKB: NA;CIViC: NA;MyCancerGenome: not present;CancerHotspot: no;3DHotspot: no	MutationAssessor: NA;SIFT: impact: deleterious, score: 0.02;Polyphen-2: impact: probably_damaging, score: 0.983	MutationAssessor: NA	SIFT: impact: deleterious, score: 0.01	Polyphen-2: impact: probably_damaging	0.99	Missense_Mutation	SNP	Diploid
PSMA1	Head and Neck Squamous Cell Carcinoma (TCGA, PanCancer Atlas)	TCGA-BA-5152-01	HNSC	Head and Neck Squamous Cell Carcinoma	Head and Neck Squamous Cell Carcinoma	S46*		OncoKB: NA;CIViC: NA;MyCancerGenome: not present;CancerHotspot: no;3DHotspot: no	MutationAssessor: NA;SIFT: NA;Polyphen-2: NA	MutationAssessor: NA	SIFT: NA	Polyphen-2: NA		Nonsense_Mutation	SNP	Diploid
PSMA1	Cervical Squamous Cell Carcinoma (TCGA, PanCancer Atlas)	TCGA-LP-A7HU-01	CESC	Cervical Adenocarcinoma	Endocervical Adenocarcinoma	S173*		OncoKB: NA;CIViC: NA;MyCancerGenome: not present;CancerHotspot: no;3DHotspot: no	MutationAssessor: NA;SIFT: NA;Polyphen-2: NA	MutationAssessor: NA	SIFT: impact: deleterious, score: 0.01	Polyphen-2: impact: probably_damaging	0.97	Nonsense_Mutation	SNP	ShallowDel
PSMA1	Mesothelioma (TCGA, PanCancer Atlas)	TCGA-3U-A98I-01	MESO	Pleural Mesothelioma	Pleural Mesothelioma, Biphasic Type	A122V		OncoKB: NA;CIViC: NA;MyCancerGenome: not present;CancerHotspot: no;3DHotspot: no	MutationAssessor: NA;SIFT: NA;Polyphen-2: NA	MutationAssessor: NA	SIFT: impact: deleterious, score: 0.03	Polyphen-2: impact: probably_damaging	1	Missense_Mutation	SNP	Diploid
PSMA2	Brain Lower Grade Glioma (TCGA, PanCancer Atlas)	TCGA-DU-6392-01	LGG	Diffuse Glioma	Astrocytoma	Q96R		OncoKB: NA;CIViC: NA;MyCancerGenome: not present;CancerHotspot: no;3DHotspot: no	MutationAssessor: NA;SIFT: impact: tolerated, score: 0.53;Polyphen-2: impact: benign, score: 0.149	MutationAssessor: NA	SIFT: impact: deleterious, score: 0.03	Polyphen-2: impact: probably_damaging	1	Missense_Mutation	SNP	Gain
PSMA2	Brain Lower Grade Glioma (TCGA, PanCancer Atlas)	TCGA-P5-A77X-01	LGG	Diffuse Glioma	Oligoastrocytoma	Y76H		OncoKB: NA;CIViC: NA;MyCancerGenome: not present;CancerHotspot: no;3DHotspot: no	MutationAssessor: NA;SIFT: impact: deleterious, score: 0.01;Polyphen-2: impact: probably_damaging, score: 0.989	MutationAssessor: NA	SIFT: impact: deleterious, score: 0.03	Polyphen-2: impact: benign	0.1	Missense_Mutation	SNP	Diploid
PSMA2	Lung Squamous Cell Carcinoma (TCGA, PanCancer Atlas)	TCGA-98-8023-01	LUSC	Non-Small Cell Lung Cancer	Lung Squamous Cell Carcinoma	W158*		OncoKB: NA;CIViC: NA;MyCancerGenome: not present;CancerHotspot: no;3DHotspot: no	MutationAssessor: NA;SIFT: NA;Polyphen-2: NA	MutationAssessor: NA	SIFT: NA	Polyphen-2: NA		Nonsense_Mutation	SNP	Gain
PSMA2	Bladder Urothelial Carcinoma (TCGA, PanCancer Atlas)	TCGA-E7-A6MF-01	BLCA	Bladder Urothelial Carcinoma	Bladder Urothelial Carcinoma	E175Q		OncoKB: NA;CIViC: NA;MyCancerGenome: not present;CancerHotspot: no;3DHotspot: no	MutationAssessor: NA;SIFT: impact: deleterious, score: 0.01;Polyphen-2: impact: probably_damaging, score: 0.972	MutationAssessor: NA	SIFT: impact: tolerated, score: 0.11	Polyphen-2: impact: possibly_damaging	0.72	Missense_Mutation	SNP	Diploid
PSMA2	Bladder Urothelial Carcinoma (TCGA, PanCancer Atlas)	TCGA-ZF-A9RC-01	BLCA	Bladder Urothelial Carcinoma	Bladder Urothelial Carcinoma	H189Y		OncoKB: NA;CIViC: NA;MyCancerGenome: not present;CancerHotspot: no;3DHotspot: no	MutationAssessor: NA;SIFT: impact: deleterious, score: 0.03;Polyphen-2: impact: probably_damaging, score: 0.999	MutationAssessor: NA	SIFT: NA	Polyphen-2: NA		Missense_Mutation	SNP	Gain
PSMA2	Prostate Adenocarcinoma (TCGA, PanCancer Atlas)	TCGA-HC-7736-01	PRAD	Prostate Adenocarcinoma	Prostate Adenocarcinoma	H189D		OncoKB: NA;CIViC: NA;MyCancerGenome: not present;CancerHotspot: no;3DHotspot: no	MutationAssessor: NA;SIFT: impact: deleterious, score: 0.03;Polyphen-2: impact: probably_damaging, score: 1	MutationAssessor: NA	SIFT: impact: deleterious, score: 0	Polyphen-2: impact: probably_damaging	0.95	Missense_Mutation	SNP	Diploid
PSMA2	Uterine Corpus Endometrial Carcinoma (TCGA, PanCancer Atlas)	TCGA-BG-A0LX-01	UCEC	Endometrial Carcinoma	Uterine Endometrioid Carcinoma	R128H		OncoKB: NA;CIViC: NA;MyCancerGenome: not present;CancerHotspot: no;3DHotspot: no	MutationAssessor: NA;SIFT: impact: deleterious, score: 0.03;Polyphen-2: impact: benign, score: 0.095	MutationAssessor: NA	SIFT: impact: deleterious, score: 0	Polyphen-2: impact: probably_damaging	0.95	Missense_Mutation	SNP	Diploid
PSMA2	Uterine Corpus Endometrial Carcinoma (TCGA, PanCancer Atlas)	TCGA-AP-A0LM-01	UCEC	Endometrial Carcinoma	Uterine Endometrioid Carcinoma	X196_splice		OncoKB: NA;CIViC: NA;MyCancerGenome: not present;CancerHotspot: no;3DHotspot: no	MutationAssessor: NA;SIFT: NA;Polyphen-2: NA	MutationAssessor: NA	SIFT: NA	Polyphen-2: NA		Splice_Site	SNP	Diploid
PSMA2	Uterine Corpus Endometrial Carcinoma (TCGA, PanCancer Atlas)	TCGA-D1-A16Y-01	UCEC	Endometrial Carcinoma	Uterine Endometrioid Carcinoma	E103*		OncoKB: NA;CIViC: NA;MyCancerGenome: not present;CancerHotspot: no;3DHotspot: no	MutationAssessor: NA;SIFT: NA;Polyphen-2: NA	MutationAssessor: NA	SIFT: impact: deleterious, score: 0.04	Polyphen-2: impact: benign	0.31	Nonsense_Mutation	SNP	Diploid
PSMA2	Uterine Corpus Endometrial Carcinoma (TCGA, PanCancer Atlas)	TCGA-D1-A17Q-01	UCEC	Endometrial Carcinoma	Uterine Endometrioid Carcinoma	N169D		OncoKB: NA;CIViC: NA;MyCancerGenome: not present;CancerHotspot: no;3DHotspot: no	MutationAssessor: NA;SIFT: impact: tolerated, score: 0.11;Polyphen-2: impact: possibly_damaging, score: 0.715	MutationAssessor: NA	SIFT: impact: deleterious, score: 0	Polyphen-2: impact: probably_damaging	1	Missense_Mutation	SNP	Diploid
PSMA2	Uterine Corpus Endometrial Carcinoma (TCGA, PanCancer Atlas)	TCGA-EO-A22U-01	UCEC	Endometrial Carcinoma	Uterine Endometrioid Carcinoma	R60*		OncoKB: NA;CIViC: NA;MyCancerGenome: not present;CancerHotspot: no;3DHotspot: no	MutationAssessor: NA;SIFT: NA;Polyphen-2: NA	MutationAssessor: NA	SIFT: impact: deleterious, score: 0.02	Polyphen-2: impact: probably_damaging	1	Nonsense_Mutation	SNP	Diploid
PSMA2	Uterine Corpus Endometrial Carcinoma (TCGA, PanCancer Atlas)	TCGA-A5-A0G2-01	UCEC	Endometrial Carcinoma	Uterine Serous Carcinoma/Uterine Papillary Serous Carcinoma	D82N		OncoKB: NA;CIViC: NA;MyCancerGenome: not present;CancerHotspot: no;3DHotspot: no	MutationAssessor: NA;SIFT: impact: deleterious, score: 0;Polyphen-2: impact: probably_damaging, score: 0.953	MutationAssessor: NA	SIFT: impact: tolerated, score: 0.06	Polyphen-2: impact: probably_damaging	0.98	Missense_Mutation	SNP	Diploid
PSMA2	Uterine Corpus Endometrial Carcinoma (TCGA, PanCancer Atlas)	TCGA-EO-A3B0-01	UCEC	Endometrial Carcinoma	Uterine Endometrioid Carcinoma	D82N		OncoKB: NA;CIViC: NA;MyCancerGenome: not present;CancerHotspot: no;3DHotspot: no	MutationAssessor: NA;SIFT: impact: deleterious, score: 0;Polyphen-2: impact: probably_damaging, score: 0.953	MutationAssessor: NA	SIFT: impact: deleterious, score: 0.02	Polyphen-2: impact: benign	0.05	Missense_Mutation	SNP	Diploid
PSMA2	Uterine Corpus Endometrial Carcinoma (TCGA, PanCancer Atlas)	TCGA-AP-A1DV-01	UCEC	Endometrial Carcinoma	Uterine Endometrioid Carcinoma	E209*		OncoKB: NA;CIViC: NA;MyCancerGenome: not present;CancerHotspot: no;3DHotspot: no	MutationAssessor: NA;SIFT: NA;Polyphen-2: NA	MutationAssessor: NA	SIFT: impact: deleterious, score: 0	Polyphen-2: impact: probably_damaging	1	Nonsense_Mutation	SNP	Diploid
PSMA2	Uterine Corpus Endometrial Carcinoma (TCGA, PanCancer Atlas)	TCGA-AX-A2HC-01	UCEC	Endometrial Carcinoma	Uterine Endometrioid Carcinoma	K165N		OncoKB: NA;CIViC: NA;MyCancerGenome: not present;CancerHotspot: no;3DHotspot: no	MutationAssessor: NA;SIFT: impact: deleterious, score: 0.04;Polyphen-2: impact: benign, score: 0.308	MutationAssessor: NA	SIFT: impact: tolerated, score: 0.1	Polyphen-2: impact: benign	0.02	Missense_Mutation	SNP	Diploid
PSMA2	Uterine Corpus Endometrial Carcinoma (TCGA, PanCancer Atlas)	TCGA-DI-A1BU-01	UCEC	Endometrial Carcinoma	Uterine Mixed Endometrial Carcinoma	L221P		OncoKB: NA;CIViC: NA;MyCancerGenome: not present;CancerHotspot: no;3DHotspot: no	MutationAssessor: NA;SIFT: impact: deleterious, score: 0;Polyphen-2: impact: probably_damaging, score: 1	MutationAssessor: NA	SIFT: impact: tolerated, score: 0.1	Polyphen-2: impact: benign	0.01	Missense_Mutation	SNP	Diploid
PSMA2	Uterine Corpus Endometrial Carcinoma (TCGA, PanCancer Atlas)	TCGA-DI-A1BU-01	UCEC	Endometrial Carcinoma	Uterine Mixed Endometrial Carcinoma	V45A		OncoKB: NA;CIViC: NA;MyCancerGenome: not present;CancerHotspot: no;3DHotspot: no	MutationAssessor: NA;SIFT: impact: deleterious, score: 0.02;Polyphen-2: impact: probably_damaging, score: 0.995	MutationAssessor: NA	SIFT: impact: tolerated, score: 1	Polyphen-2: impact: benign	0.06	Missense_Mutation	SNP	Diploid
PSMA2	Uterine Corpus Endometrial Carcinoma (TCGA, PanCancer Atlas)	TCGA-DI-A1BU-01	UCEC	Endometrial Carcinoma	Uterine Mixed Endometrial Carcinoma	V45I		OncoKB: NA;CIViC: NA;MyCancerGenome: not present;CancerHotspot: no;3DHotspot: no	MutationAssessor: NA;SIFT: impact: tolerated, score: 0.06;Polyphen-2: impact: probably_damaging, score: 0.975	MutationAssessor: NA	SIFT: impact: deleterious, score: 0	Polyphen-2: impact: probably_damaging	0.99	Missense_Mutation	SNP	Diploid
PSMA2	Uterine Corpus Endometrial Carcinoma (TCGA, PanCancer Atlas)	TCGA-E6-A2P8-01	UCEC	Endometrial Carcinoma	Uterine Mixed Endometrial Carcinoma	A2V		OncoKB: NA;CIViC: NA;MyCancerGenome: not present;CancerHotspot: no;3DHotspot: no	MutationAssessor: NA;SIFT: impact: deleterious, score: 0.02;Polyphen-2: impact: benign, score: 0.049	MutationAssessor: NA	SIFT: impact: tolerated, score: 0.72	Polyphen-2: impact: possibly_damaging	0.56	Missense_Mutation	SNP	Diploid
PSMA2	Uterine Corpus Endometrial Carcinoma (TCGA, PanCancer Atlas)	TCGA-FI-A2F4-01	UCEC	Endometrial Carcinoma	Uterine Endometrioid Carcinoma	X20_splice		OncoKB: NA;CIViC: NA;MyCancerGenome: not present;CancerHotspot: no;3DHotspot: no	MutationAssessor: NA;SIFT: NA;Polyphen-2: NA	MutationAssessor: NA	SIFT: impact: tolerated, score: 0.36	Polyphen-2: impact: benign	score: 0.001	Splice_Region	SNP	Diploid
PSMA2	Skin Cutaneous Melanoma (TCGA, PanCancer Atlas)	TCGA-BF-A1PX-01	SKCM	Melanoma	Cutaneous Melanoma	G17C		OncoKB: NA;CIViC: NA;MyCancerGenome: not present;CancerHotspot: no;3DHotspot: no	MutationAssessor: NA;SIFT: impact: deleterious, score: 0;Polyphen-2: impact: probably_damaging, score: 0.999	MutationAssessor: NA	SIFT: impact: tolerated, score: 0.05	Polyphen-2: impact: benign	0.11	Missense_Mutation	SNP
PSMA2	Skin Cutaneous Melanoma (TCGA, PanCancer Atlas)	TCGA-D3-A2JC-06	SKCM	Melanoma	Cutaneous Melanoma	P223Q		OncoKB: NA;CIViC: NA;MyCancerGenome: not present;CancerHotspot: no;3DHotspot: no	MutationAssessor: NA;SIFT: impact: tolerated, score: 0.1;Polyphen-2: impact: benign, score: 0.024	MutationAssessor: NA	SIFT: impact: deleterious, score: 0.03	Polyphen-2: impact: benign	0.1	Missense_Mutation	SNP	Gain
PSMA2	Skin Cutaneous Melanoma (TCGA, PanCancer Atlas)	TCGA-D3-A3CE-06	SKCM	Melanoma	Cutaneous Melanoma	P223T		OncoKB: NA;CIViC: NA;MyCancerGenome: not present;CancerHotspot: no;3DHotspot: no	MutationAssessor: NA;SIFT: impact: tolerated, score: 0.1;Polyphen-2: impact: benign, score: 0.009	MutationAssessor: NA	SIFT: impact: tolerated, score: 0.38	Polyphen-2: impact: benign	0.09	Missense_Mutation	SNP	ShallowDel
PSMA2	Skin Cutaneous Melanoma (TCGA, PanCancer Atlas)	TCGA-EE-A17Z-06	SKCM	Melanoma	Cutaneous Melanoma	P34T		OncoKB: NA;CIViC: NA;MyCancerGenome: not present;CancerHotspot: no;3DHotspot: no	MutationAssessor: NA;SIFT: impact: tolerated, score: 1;Polyphen-2: impact: benign, score: 0.062	MutationAssessor: NA	SIFT: impact: tolerated, score: 0.53	Polyphen-2: impact: benign	0.13	Missense_Mutation	SNP	ShallowDel
PSMA2	Skin Cutaneous Melanoma (TCGA, PanCancer Atlas)	TCGA-EE-A2GE-06	SKCM	Melanoma	Cutaneous Melanoma	R91L		OncoKB: NA;CIViC: NA;MyCancerGenome: not present;CancerHotspot: no;3DHotspot: no	MutationAssessor: NA;SIFT: impact: deleterious, score: 0;Polyphen-2: impact: probably_damaging, score: 0.986	MutationAssessor: NA	SIFT: impact: tolerated, score: 0.14	Polyphen-2: impact: possibly_damaging	0.78	Missense_Mutation	SNP	Gain
PSMA2	Stomach Adenocarcinoma (TCGA, PanCancer Atlas)	TCGA-BR-4184-01	STAD	Esophagogastric Adenocarcinoma	Stomach Adenocarcinoma	A33T		OncoKB: NA;CIViC: NA;MyCancerGenome: not present;CancerHotspot: no;3DHotspot: no	MutationAssessor: NA;SIFT: impact: tolerated, score: 0.72;Polyphen-2: impact: possibly_damaging, score: 0.563	MutationAssessor: NA	SIFT: NA	Polyphen-2: NA		Missense_Mutation	SNP	Gain
PSMA2	Breast Invasive Carcinoma (TCGA, PanCancer Atlas)	TCGA-OL-A5DA-01	BRCA	Invasive Breast Carcinoma	Breast Invasive Lobular Carcinoma	E215K		OncoKB: NA;CIViC: NA;MyCancerGenome: not present;CancerHotspot: no;3DHotspot: no	MutationAssessor: NA;SIFT: impact: tolerated, score: 0.36;Polyphen-2: impact: benign, score: 0.001	MutationAssessor: NA	SIFT: impact: deleterious, score: 0	Polyphen-2: impact: benign	0.18	Missense_Mutation	SNP	Diploid
PSMA2	Breast Invasive Carcinoma (TCGA, PanCancer Atlas)	TCGA-A8-A09Z-01	BRCA	Invasive Breast Carcinoma	Breast Invasive Lobular Carcinoma	X30_splice		OncoKB: NA;CIViC: NA;MyCancerGenome: not present;CancerHotspot: no;3DHotspot: no	MutationAssessor: NA;SIFT: NA;Polyphen-2: NA	MutationAssessor: NA	SIFT: impact: deleterious, score: 0.02	Polyphen-2: impact: benign	score: 0.259	Splice_Region	SNP	Diploid
PSMA2	Pancreatic Adenocarcinoma (TCGA, PanCancer Atlas)	TCGA-IB-7651-01	PAAD	Pancreatic Adenocarcinoma	Pancreatic Adenocarcinoma	R220M		OncoKB: NA;CIViC: NA;MyCancerGenome: not present;CancerHotspot: no;3DHotspot: no	MutationAssessor: NA;SIFT: impact: tolerated, score: 0.05;Polyphen-2: impact: benign, score: 0.114	MutationAssessor: NA	SIFT: impact: deleterious, score: 0	Polyphen-2: impact: probably_damaging	1	Missense_Mutation	SNP	Diploid
PSMA2	Colorectal Adenocarcinoma (TCGA, PanCancer Atlas)	TCGA-AA-3811-01	COAD	Colorectal Adenocarcinoma	Colon Adenocarcinoma	R128H		OncoKB: NA;CIViC: NA;MyCancerGenome: not present;CancerHotspot: no;3DHotspot: no	MutationAssessor: NA;SIFT: impact: deleterious, score: 0.03;Polyphen-2: impact: benign, score: 0.095	MutationAssessor: NA	SIFT: impact: deleterious, score: 0.03	Polyphen-2: impact: possibly_damaging	0.56	Missense_Mutation	SNP	Gain
PSMA2	Colorectal Adenocarcinoma (TCGA, PanCancer Atlas)	TCGA-CA-6717-01	COAD	Colorectal Adenocarcinoma	Mucinous Adenocarcinoma of the Colon and Rectum	V168G		OncoKB: NA;CIViC: NA;MyCancerGenome: not present;CancerHotspot: no;3DHotspot: no	MutationAssessor: NA;SIFT: impact: tolerated, score: 0.38;Polyphen-2: impact: benign, score: 0.09	MutationAssessor: NA	SIFT: impact: tolerated, score: 0.13	Polyphen-2: impact: benign	0.08	Missense_Mutation	SNP	Diploid
PSMA2	Colorectal Adenocarcinoma (TCGA, PanCancer Atlas)	TCGA-F4-6570-01	COAD	Colorectal Adenocarcinoma	Colon Adenocarcinoma	A108D		OncoKB: NA;CIViC: NA;MyCancerGenome: not present;CancerHotspot: no;3DHotspot: no	MutationAssessor: NA;SIFT: impact: tolerated, score: 0.53;Polyphen-2: impact: benign, score: 0.129	MutationAssessor: NA	SIFT: impact: deleterious, score: 0.04	Polyphen-2: impact: benign	0	Missense_Mutation	SNP	Diploid
PSMA2	Colorectal Adenocarcinoma (TCGA, PanCancer Atlas)	TCGA-G4-6628-01	COAD	Colorectal Adenocarcinoma	Colon Adenocarcinoma	X177_splice		OncoKB: NA;CIViC: NA;MyCancerGenome: not present;CancerHotspot: no;3DHotspot: no	MutationAssessor: NA;SIFT: NA;Polyphen-2: NA	MutationAssessor: NA	SIFT: impact: tolerated, score: 0.08	Polyphen-2: impact: benign	score: 0.114	Splice_Region	SNP	Diploid
PSMA2	Head and Neck Squamous Cell Carcinoma (TCGA, PanCancer Atlas)	TCGA-CN-5360-01	HNSC	Head and Neck Squamous Cell Carcinoma	Head and Neck Squamous Cell Carcinoma	M79I		OncoKB: NA;CIViC: NA;MyCancerGenome: not present;CancerHotspot: no;3DHotspot: no	MutationAssessor: NA;SIFT: impact: tolerated, score: 0.14;Polyphen-2: impact: possibly_damaging, score: 0.783	MutationAssessor: NA	SIFT: NA	Polyphen-2: NA		Missense_Mutation	SNP	Diploid
PSMA3	Liver Hepatocellular Carcinoma (TCGA, PanCancer Atlas)	TCGA-FV-A495-01	LIHC	Hepatocellular Carcinoma	Hepatocellular Carcinoma	PSMA3-STRADA		OncoKB: Unknown, level NA, resistance NA;CIViC: NA;MyCancerGenome: not present;CancerHotspot: no;3DHotspot: no	MutationAssessor: NA;SIFT: NA;Polyphen-2: NA	MutationAssessor: NA	SIFT: impact: tolerated, score: 0.09	Polyphen-2: impact: benign	0.15	fusion	FUSION	Gain
PSMA3	Brain Lower Grade Glioma (TCGA, PanCancer Atlas)	TCGA-DU-6392-01	LGG	Diffuse Glioma	Astrocytoma	E204K		OncoKB: NA;CIViC: NA;MyCancerGenome: not present;CancerHotspot: no;3DHotspot: no	MutationAssessor: NA;SIFT: impact: deleterious, score: 0;Polyphen-2: impact: benign, score: 0.182	MutationAssessor: NA	SIFT: impact: deleterious, score: 0	Polyphen-2: impact: benign	0.18	Missense_Mutation	SNP	Diploid
PSMA3	Glioblastoma Multiforme (TCGA, PanCancer Atlas)	TCGA-19-2623-01	GBM	Glioblastoma	Glioblastoma Multiforme	I232T		OncoKB: NA;CIViC: NA;MyCancerGenome: not present;CancerHotspot: no;3DHotspot: no	MutationAssessor: NA;SIFT: impact: deleterious, score: 0.02;Polyphen-2: impact: benign, score: 0.259	MutationAssessor: NA	SIFT: impact: deleterious, score: 0	Polyphen-2: impact: benign	0.18	Missense_Mutation	SNP	ShallowDel
PSMA3	Glioblastoma Multiforme (TCGA, PanCancer Atlas)	TCGA-06-5416-01	GBM	Glioblastoma	Glioblastoma Multiforme	A240D		OncoKB: NA;CIViC: NA;MyCancerGenome: not present;CancerHotspot: no;3DHotspot: no	MutationAssessor: NA;SIFT: impact: deleterious, score: 0;Polyphen-2: impact: probably_damaging, score: 1	MutationAssessor: NA	SIFT: impact: deleterious, score: 0	Polyphen-2: impact: benign	0.18	Missense_Mutation	SNP	ShallowDel
PSMA3	Lung Squamous Cell Carcinoma (TCGA, PanCancer Atlas)	TCGA-58-A46K-01	LUSC	Non-Small Cell Lung Cancer	Lung Squamous Cell Carcinoma	I4M		OncoKB: NA;CIViC: NA;MyCancerGenome: not present;CancerHotspot: no;3DHotspot: no	MutationAssessor: NA;SIFT: impact: deleterious, score: 0.03;Polyphen-2: impact: possibly_damaging, score: 0.563	MutationAssessor: NA	SIFT: impact: deleterious, score: 0	Polyphen-2: impact: benign	0.18	Missense_Mutation	SNP	ShallowDel
PSMA3	Lung Squamous Cell Carcinoma (TCGA, PanCancer Atlas)	TCGA-90-A4EE-01	LUSC	Non-Small Cell Lung Cancer	Lung Squamous Cell Carcinoma	S87F		OncoKB: NA;CIViC: NA;MyCancerGenome: not present;CancerHotspot: no;3DHotspot: no	MutationAssessor: NA;SIFT: impact: tolerated, score: 0.13;Polyphen-2: impact: benign, score: 0.083	MutationAssessor: NA	SIFT: impact: deleterious, score: 0	Polyphen-2: impact: probably_damaging	1	Missense_Mutation	SNP	ShallowDel
PSMA3	Bladder Urothelial Carcinoma (TCGA, PanCancer Atlas)	TCGA-XF-AAN7-01	BLCA	Bladder Urothelial Carcinoma	Bladder Urothelial Carcinoma	D253G		OncoKB: NA;CIViC: NA;MyCancerGenome: not present;CancerHotspot: no;3DHotspot: no	MutationAssessor: NA;SIFT: impact: deleterious, score: 0.04;Polyphen-2: impact: benign, score: 0.003	MutationAssessor: NA	SIFT: impact: deleterious, score: 0	Polyphen-2: impact: probably_damaging	1	Missense_Mutation	SNP	Diploid
PSMA3	Liver Hepatocellular Carcinoma (TCGA, PanCancer Atlas)	TCGA-G3-AAV6-01	LIHC	Hepatocellular Carcinoma	Hepatocellular Carcinoma	K192E		OncoKB: NA;CIViC: NA;MyCancerGenome: not present;CancerHotspot: no;3DHotspot: no	MutationAssessor: NA;SIFT: impact: tolerated, score: 0.08;Polyphen-2: impact: benign, score: 0.114	MutationAssessor: NA	SIFT: NA	Polyphen-2: NA		Missense_Mutation	SNP	Gain
PSMA3	Kidney Renal Clear Cell Carcinoma (TCGA, PanCancer Atlas)	TCGA-BP-4964-01	KIRC	Renal Clear Cell Carcinoma	Renal Clear Cell Carcinoma	G133Wfs*13		OncoKB: NA;CIViC: NA;MyCancerGenome: not present;CancerHotspot: no;3DHotspot: no	MutationAssessor: NA;SIFT: NA;Polyphen-2: NA	MutationAssessor: NA	SIFT: impact: tolerated, score: 0.49	Polyphen-2: impact: benign	0	Frame_Shift_Ins	INS	Diploid
PSMA3	Kidney Renal Clear Cell Carcinoma (TCGA, PanCancer Atlas)	TCGA-BP-4163-01	KIRC	Renal Clear Cell Carcinoma	Renal Clear Cell Carcinoma	V201I		OncoKB: NA;CIViC: NA;MyCancerGenome: not present;CancerHotspot: no;3DHotspot: no	MutationAssessor: NA;SIFT: impact: tolerated, score: 0.09;Polyphen-2: impact: benign, score: 0.146	MutationAssessor: NA	SIFT: impact: deleterious, score: 0.01	Polyphen-2: impact: benign	0.16	Missense_Mutation	SNP	ShallowDel
PSMA3	Uterine Corpus Endometrial Carcinoma (TCGA, PanCancer Atlas)	TCGA-D1-A103-01	UCEC	Endometrial Carcinoma	Uterine Endometrioid Carcinoma	X159_splice		OncoKB: NA;CIViC: NA;MyCancerGenome: not present;CancerHotspot: no;3DHotspot: no	MutationAssessor: NA;SIFT: NA;Polyphen-2: NA	MutationAssessor: NA	SIFT: impact: deleterious, score: 0.01	Polyphen-2: impact: probably_damaging	score: 1	Splice_Site	SNP	Diploid
PSMA3	Uterine Corpus Endometrial Carcinoma (TCGA, PanCancer Atlas)	TCGA-A5-A0G2-01	UCEC	Endometrial Carcinoma	Uterine Serous Carcinoma/Uterine Papillary Serous Carcinoma	E204K		OncoKB: NA;CIViC: NA;MyCancerGenome: not present;CancerHotspot: no;3DHotspot: no	MutationAssessor: NA;SIFT: impact: deleterious, score: 0;Polyphen-2: impact: benign, score: 0.182	MutationAssessor: NA	SIFT: impact: tolerated, score: 0.75	Polyphen-2: impact: benign	0.01	Missense_Mutation	SNP	Diploid
PSMA3	Uterine Corpus Endometrial Carcinoma (TCGA, PanCancer Atlas)	TCGA-AP-A056-01	UCEC	Endometrial Carcinoma	Uterine Endometrioid Carcinoma	E204K		OncoKB: NA;CIViC: NA;MyCancerGenome: not present;CancerHotspot: no;3DHotspot: no	MutationAssessor: NA;SIFT: impact: deleterious, score: 0;Polyphen-2: impact: benign, score: 0.182	MutationAssessor: NA	SIFT: impact: tolerated, score: 0.11	Polyphen-2: impact: benign	0	Missense_Mutation	SNP	Diploid
PSMA3	Uterine Corpus Endometrial Carcinoma (TCGA, PanCancer Atlas)	TCGA-B5-A1MR-01	UCEC	Endometrial Carcinoma	Uterine Endometrioid Carcinoma	E204K		OncoKB: NA;CIViC: NA;MyCancerGenome: not present;CancerHotspot: no;3DHotspot: no	MutationAssessor: NA;SIFT: impact: deleterious, score: 0;Polyphen-2: impact: benign, score: 0.182	MutationAssessor: NA	SIFT: impact: deleterious, score: 0	Polyphen-2: impact: probably_damaging	1	Missense_Mutation	SNP	Diploid
PSMA3	Uterine Corpus Endometrial Carcinoma (TCGA, PanCancer Atlas)	TCGA-BS-A0UF-01	UCEC	Endometrial Carcinoma	Uterine Endometrioid Carcinoma	E204K		OncoKB: NA;CIViC: NA;MyCancerGenome: not present;CancerHotspot: no;3DHotspot: no	MutationAssessor: NA;SIFT: impact: deleterious, score: 0;Polyphen-2: impact: benign, score: 0.182	MutationAssessor: NA	SIFT: NA	Polyphen-2: NA		Missense_Mutation	SNP	Diploid
PSMA3	Uterine Corpus Endometrial Carcinoma (TCGA, PanCancer Atlas)	TCGA-AJ-A3EL-01	UCEC	Endometrial Carcinoma	Uterine Endometrioid Carcinoma	R66I		OncoKB: NA;CIViC: NA;MyCancerGenome: not present;CancerHotspot: no;3DHotspot: no	MutationAssessor: NA;SIFT: impact: deleterious, score: 0;Polyphen-2: impact: probably_damaging, score: 0.995	MutationAssessor: NA	SIFT: NA	Polyphen-2: NA		Missense_Mutation	SNP	Diploid
PSMA3	Uterine Corpus Endometrial Carcinoma (TCGA, PanCancer Atlas)	TCGA-BS-A0TC-01	UCEC	Endometrial Carcinoma	Uterine Endometrioid Carcinoma	R66I		OncoKB: NA;CIViC: NA;MyCancerGenome: not present;CancerHotspot: no;3DHotspot: no	MutationAssessor: NA;SIFT: impact: deleterious, score: 0;Polyphen-2: impact: probably_damaging, score: 0.995	MutationAssessor: NA	SIFT: impact: tolerated, score: 0.23	Polyphen-2: impact: benign	0.45	Missense_Mutation	SNP	Diploid
PSMA3	Uterine Corpus Endometrial Carcinoma (TCGA, PanCancer Atlas)	TCGA-AX-A0J1-01	UCEC	Endometrial Carcinoma	Uterine Endometrioid Carcinoma	Q148*		OncoKB: NA;CIViC: NA;MyCancerGenome: not present;CancerHotspot: no;3DHotspot: no	MutationAssessor: NA;SIFT: NA;Polyphen-2: NA	MutationAssessor: NA	SIFT: impact: deleterious, score: 0.03	Polyphen-2: impact: benign	0.41	Nonsense_Mutation	SNP	Diploid
PSMA3	Uterine Corpus Endometrial Carcinoma (TCGA, PanCancer Atlas)	TCGA-A5-A0G2-01	UCEC	Endometrial Carcinoma	Uterine Serous Carcinoma/Uterine Papillary Serous Carcinoma	I227L		OncoKB: NA;CIViC: NA;MyCancerGenome: not present;CancerHotspot: no;3DHotspot: no	MutationAssessor: NA;SIFT: impact: tolerated, score: 0.49;Polyphen-2: impact: benign, score: 0	MutationAssessor: NA	SIFT: impact: deleterious, score: 0.01	Polyphen-2: impact: probably_damaging	0.99	Missense_Mutation	SNP	Diploid
PSMA3	Uterine Corpus Endometrial Carcinoma (TCGA, PanCancer Atlas)	TCGA-AJ-A2QM-01	UCEC	Endometrial Carcinoma	Uterine Serous Carcinoma/Uterine Papillary Serous Carcinoma	D114H		OncoKB: NA;CIViC: NA;MyCancerGenome: not present;CancerHotspot: no;3DHotspot: no	MutationAssessor: NA;SIFT: impact: deleterious, score: 0.01;Polyphen-2: impact: benign, score: 0.162	MutationAssessor: NA	SIFT: NA	Polyphen-2: NA		Missense_Mutation	SNP	Diploid
PSMA3	Uterine Corpus Endometrial Carcinoma (TCGA, PanCancer Atlas)	TCGA-B5-A1MR-01	UCEC	Endometrial Carcinoma	Uterine Endometrioid Carcinoma	D203Y		OncoKB: NA;CIViC: NA;MyCancerGenome: not present;CancerHotspot: no;3DHotspot: no	MutationAssessor: NA;SIFT: impact: deleterious, score: 0.01;Polyphen-2: impact: probably_damaging, score: 1	MutationAssessor: NA	SIFT: impact: deleterious, score: 0	Polyphen-2: impact: probably_damaging	0.99	Missense_Mutation	SNP	Diploid
PSMA3	Uterine Corpus Endometrial Carcinoma (TCGA, PanCancer Atlas)	TCGA-B5-A3FA-01	UCEC	Endometrial Carcinoma	Uterine Endometrioid Carcinoma	H111Y		OncoKB: NA;CIViC: NA;MyCancerGenome: not present;CancerHotspot: no;3DHotspot: no	MutationAssessor: NA;SIFT: impact: tolerated, score: 0.75;Polyphen-2: impact: benign, score: 0.014	MutationAssessor: NA	SIFT: impact: tolerated, score: 0.18	Polyphen-2: impact: probably_damaging	0.98	Missense_Mutation	SNP	Diploid
PSMA3	Uterine Corpus Endometrial Carcinoma (TCGA, PanCancer Atlas)	TCGA-B5-A3FC-01	UCEC	Endometrial Carcinoma	Uterine Endometrioid Carcinoma	X76_splice		OncoKB: NA;CIViC: NA;MyCancerGenome: not present;CancerHotspot: no;3DHotspot: no	MutationAssessor: NA;SIFT: NA;Polyphen-2: NA	MutationAssessor: NA	SIFT: impact: deleterious, score: 0	Polyphen-2: impact: possibly_damaging	score: 0.757	Splice_Site	SNP	Diploid
PSMA3	Uterine Corpus Endometrial Carcinoma (TCGA, PanCancer Atlas)	TCGA-BS-A0UF-01	UCEC	Endometrial Carcinoma	Uterine Endometrioid Carcinoma	N106S		OncoKB: NA;CIViC: NA;MyCancerGenome: not present;CancerHotspot: no;3DHotspot: no	MutationAssessor: NA;SIFT: impact: tolerated, score: 0.11;Polyphen-2: impact: benign, score: 0	MutationAssessor: NA	SIFT: impact: deleterious, score: 0	Polyphen-2: impact: probably_damaging	0.96	Missense_Mutation	SNP	Diploid
PSMA3	Lung Adenocarcinoma (TCGA, PanCancer Atlas)	TCGA-05-4427-01	LUAD	Non-Small Cell Lung Cancer	Lung Adenocarcinoma	T175M		OncoKB: NA;CIViC: NA;MyCancerGenome: not present;CancerHotspot: no;3DHotspot: no	MutationAssessor: NA;SIFT: impact: deleterious, score: 0;Polyphen-2: impact: probably_damaging, score: 0.997	MutationAssessor: NA	SIFT: impact: tolerated, score: 0.13	Polyphen-2: impact: benign	0.31	Missense_Mutation	SNP	ShallowDel
PSMA3	Skin Cutaneous Melanoma (TCGA, PanCancer Atlas)	TCGA-EE-A20C-06	SKCM	Melanoma	Cutaneous Melanoma	E234*		OncoKB: NA;CIViC: NA;MyCancerGenome: not present;CancerHotspot: no;3DHotspot: no	MutationAssessor: NA;SIFT: NA;Polyphen-2: NA	MutationAssessor: NA	SIFT: impact: deleterious, score: 0.01	Polyphen-2: impact: benign	0.08	Nonsense_Mutation	SNP	ShallowDel
PSMA3	Skin Cutaneous Melanoma (TCGA, PanCancer Atlas)	TCGA-ER-A19N-06	SKCM	Melanoma	Cutaneous Melanoma	E246*		OncoKB: NA;CIViC: NA;MyCancerGenome: not present;CancerHotspot: no;3DHotspot: no	MutationAssessor: NA;SIFT: NA;Polyphen-2: NA	MutationAssessor: NA	SIFT: impact: deleterious, score: 0.02	Polyphen-2: impact: benign	0.42	Nonsense_Mutation	SNP	Diploid
PSMA3	Skin Cutaneous Melanoma (TCGA, PanCancer Atlas)	TCGA-FS-A1Z0-06	SKCM	Melanoma	Cutaneous Melanoma	L244M		OncoKB: NA;CIViC: NA;MyCancerGenome: not present;CancerHotspot: no;3DHotspot: no	MutationAssessor: NA;SIFT: impact: tolerated, score: 0.23;Polyphen-2: impact: benign, score: 0.445	MutationAssessor: NA	SIFT: NA	Polyphen-2: NA		Missense_Mutation	SNP	Diploid
PSMA3	Stomach Adenocarcinoma (TCGA, PanCancer Atlas)	TCGA-BR-7707-01	STAD	Esophagogastric Adenocarcinoma	Stomach Adenocarcinoma	R188H		OncoKB: NA;CIViC: NA;MyCancerGenome: not present;CancerHotspot: no;3DHotspot: no	MutationAssessor: NA;SIFT: impact: deleterious, score: 0.03;Polyphen-2: impact: benign, score: 0.409	MutationAssessor: NA	SIFT: impact: deleterious, score: 0	Polyphen-2: impact: probably_damaging	0.99	Missense_Mutation	SNP	Diploid
PSMA3	Stomach Adenocarcinoma (TCGA, PanCancer Atlas)	TCGA-BR-A4CR-01	STAD	Esophagogastric Adenocarcinoma	Stomach Adenocarcinoma	G133S		OncoKB: NA;CIViC: NA;MyCancerGenome: not present;CancerHotspot: no;3DHotspot: no	MutationAssessor: NA;SIFT: impact: deleterious, score: 0.01;Polyphen-2: impact: probably_damaging, score: 0.985	MutationAssessor: NA	SIFT: impact: deleterious, score: 0	Polyphen-2: impact: probably_damaging	1	Missense_Mutation	SNP	Gain
PSMA3	Stomach Adenocarcinoma (TCGA, PanCancer Atlas)	TCGA-CG-5726-01	STAD	Esophagogastric Adenocarcinoma	Intestinal Type Stomach Adenocarcinoma	T36Kfs*15		OncoKB: NA;CIViC: NA;MyCancerGenome: not present;CancerHotspot: no;3DHotspot: no	MutationAssessor: NA;SIFT: NA;Polyphen-2: NA	MutationAssessor: NA	SIFT: impact: deleterious, score: 0	Polyphen-2: impact: probably_damaging	1	Frame_Shift_Del	DEL	Diploid
PSMA3	Breast Invasive Carcinoma (TCGA, PanCancer Atlas)	TCGA-D8-A1X6-01	BRCA	Invasive Breast Carcinoma	Breast Invasive Ductal Carcinoma	H225Q		OncoKB: NA;CIViC: NA;MyCancerGenome: not present;CancerHotspot: no;3DHotspot: no	MutationAssessor: NA;SIFT: impact: deleterious, score: 0;Polyphen-2: impact: probably_damaging, score: 0.988	MutationAssessor: NA	SIFT: impact: tolerated, score: 0.07	Polyphen-2: impact: probably_damaging	1	Missense_Mutation	SNP	Diploid
PSMA3	Breast Invasive Carcinoma (TCGA, PanCancer Atlas)	TCGA-D8-A1JA-01	BRCA	Invasive Breast Carcinoma	Breast Invasive Ductal Carcinoma	E60K		OncoKB: NA;CIViC: NA;MyCancerGenome: not present;CancerHotspot: no;3DHotspot: no	MutationAssessor: NA;SIFT: impact: tolerated, score: 0.18;Polyphen-2: impact: probably_damaging, score: 0.984	MutationAssessor: NA	SIFT: impact: deleterious, score: 0	Polyphen-2: impact: possibly_damaging	0.9	Missense_Mutation	SNP	Diploid
PSMA3	Breast Invasive Carcinoma (TCGA, PanCancer Atlas)	TCGA-A2-A0YH-01	BRCA	Invasive Breast Carcinoma	Breast Invasive Ductal Carcinoma	R115T		OncoKB: NA;CIViC: NA;MyCancerGenome: not present;CancerHotspot: no;3DHotspot: no	MutationAssessor: NA;SIFT: impact: deleterious, score: 0;Polyphen-2: impact: possibly_damaging, score: 0.757	MutationAssessor: NA	SIFT: impact: tolerated, score: 0.1	Polyphen-2: impact: benign	0	Missense_Mutation	SNP	Gain
PSMA3	Breast Invasive Carcinoma (TCGA, PanCancer Atlas)	TCGA-A2-A0EQ-01	BRCA	Invasive Breast Carcinoma	Breast Invasive Ductal Carcinoma	X159_splice		OncoKB: NA;CIViC: NA;MyCancerGenome: not present;CancerHotspot: no;3DHotspot: no	MutationAssessor: NA;SIFT: NA;Polyphen-2: NA	MutationAssessor: NA	SIFT: impact: deleterious, score: 0	Polyphen-2: impact: probably_damaging	score: 1	Splice_Site	SNP	ShallowDel
PSMA3	Colorectal Adenocarcinoma (TCGA, PanCancer Atlas)	TCGA-AG-A002-01	READ	Colorectal Adenocarcinoma	Rectal Adenocarcinoma	R115I		OncoKB: NA;CIViC: NA;MyCancerGenome: not present;CancerHotspot: no;3DHotspot: no	MutationAssessor: NA;SIFT: impact: deleterious, score: 0;Polyphen-2: impact: probably_damaging, score: 0.96	MutationAssessor: NA	SIFT: impact: tolerated, score: 0.44	Polyphen-2: impact: possibly_damaging	0.85	Missense_Mutation	SNP	Diploid
PSMA3	Colorectal Adenocarcinoma (TCGA, PanCancer Atlas)	TCGA-AA-3947-01	COAD	Colorectal Adenocarcinoma	Mucinous Adenocarcinoma of the Colon and Rectum	S250P		OncoKB: NA;CIViC: NA;MyCancerGenome: not present;CancerHotspot: no;3DHotspot: no	MutationAssessor: NA;SIFT: impact: tolerated, score: 0.13;Polyphen-2: impact: benign, score: 0.307	MutationAssessor: NA	SIFT: impact: tolerated, score: 0.21	Polyphen-2: impact: possibly_damaging	0.85	Missense_Mutation	SNP	Diploid
PSMA3	Colorectal Adenocarcinoma (TCGA, PanCancer Atlas)	TCGA-AA-3984-01	COAD	Colorectal Adenocarcinoma	Colon Adenocarcinoma	R72W		OncoKB: NA;CIViC: NA;MyCancerGenome: not present;CancerHotspot: no;3DHotspot: no	MutationAssessor: NA;SIFT: impact: deleterious, score: 0.01;Polyphen-2: impact: benign, score: 0.082	MutationAssessor: NA	SIFT: NA	Polyphen-2: NA		Missense_Mutation	SNP	Diploid
PSMA3	Colorectal Adenocarcinoma (TCGA, PanCancer Atlas)	TCGA-CA-6717-01	COAD	Colorectal Adenocarcinoma	Mucinous Adenocarcinoma of the Colon and Rectum	G39V		OncoKB: NA;CIViC: NA;MyCancerGenome: not present;CancerHotspot: no;3DHotspot: no	MutationAssessor: NA;SIFT: impact: deleterious, score: 0.02;Polyphen-2: impact: benign, score: 0.419	MutationAssessor: NA	SIFT: impact: tolerated, score: 0.18	Polyphen-2: impact: benign	0.01	Missense_Mutation	SNP	Diploid
PSMA3	Colorectal Adenocarcinoma (TCGA, PanCancer Atlas)	TCGA-AA-3811-01	COAD	Colorectal Adenocarcinoma	Colon Adenocarcinoma	I197*		OncoKB: NA;CIViC: NA;MyCancerGenome: not present;CancerHotspot: no;3DHotspot: no	MutationAssessor: NA;SIFT: NA;Polyphen-2: NA	MutationAssessor: NA	SIFT: impact: tolerated, score: 0.15	Polyphen-2: impact: benign	0.37	Frame_Shift_Del	DEL	ShallowDel
PSMA3	Colorectal Adenocarcinoma (TCGA, PanCancer Atlas)	TCGA-AF-2693-01	READ	Colorectal Adenocarcinoma	Rectal Adenocarcinoma	R41I		OncoKB: NA;CIViC: NA;MyCancerGenome: not present;CancerHotspot: no;3DHotspot: no	MutationAssessor: NA;SIFT: impact: deleterious, score: 0;Polyphen-2: impact: probably_damaging, score: 0.989	MutationAssessor: NA	SIFT: impact: deleterious, score: 0	Polyphen-2: impact: probably_damaging	1	Missense_Mutation	SNP	Diploid
PSMA3	Head and Neck Squamous Cell Carcinoma (TCGA, PanCancer Atlas)	TCGA-UF-A7JC-01	HNSC	Head and Neck Squamous Cell Carcinoma	Head and Neck Squamous Cell Carcinoma	D9N		OncoKB: NA;CIViC: NA;MyCancerGenome: not present;CancerHotspot: no;3DHotspot: no	MutationAssessor: NA;SIFT: impact: deleterious, score: 0;Polyphen-2: impact: probably_damaging, score: 1	MutationAssessor: NA	SIFT: NA	Polyphen-2: NA		Missense_Mutation	SNP	Gain
PSMA4	Thyroid Carcinoma (TCGA, PanCancer Atlas)	TCGA-KS-A4I5-01	THCA	Well-Differentiated Thyroid Cancer	Papillary Thyroid Cancer	R128H		OncoKB: NA;CIViC: NA;MyCancerGenome: not present;CancerHotspot: no;3DHotspot: no	MutationAssessor: NA;SIFT: impact: deleterious, score: 0;Polyphen-2: impact: probably_damaging, score: 0.999	MutationAssessor: NA	SIFT: NA	Polyphen-2: NA		Missense_Mutation	SNP	Diploid
PSMA4	Uterine Carcinosarcoma (TCGA, PanCancer Atlas)	TCGA-ND-A4WC-01	UCS	Endometrial Carcinoma	Uterine Carcinosarcoma/Uterine Malignant Mixed Mullerian Tumor	Q119H		OncoKB: NA;CIViC: NA;MyCancerGenome: not present;CancerHotspot: no;3DHotspot: no	MutationAssessor: NA;SIFT: impact: tolerated, score: 0.07;Polyphen-2: impact: probably_damaging, score: 1	MutationAssessor: NA	SIFT: impact: deleterious, score: 0.04	Polyphen-2: impact: benign	0.11	Missense_Mutation	SNP	Diploid
PSMA4	Brain Lower Grade Glioma (TCGA, PanCancer Atlas)	TCGA-DU-6392-01	LGG	Diffuse Glioma	Astrocytoma	A39V		OncoKB: NA;CIViC: NA;MyCancerGenome: not present;CancerHotspot: no;3DHotspot: no	MutationAssessor: NA;SIFT: impact: deleterious, score: 0;Polyphen-2: impact: possibly_damaging, score: 0.899	MutationAssessor: NA	SIFT: impact: tolerated, score: 0.2	Polyphen-2: impact: benign	0.06	Missense_Mutation	SNP	Diploid
PSMA4	Lung Squamous Cell Carcinoma (TCGA, PanCancer Atlas)	TCGA-43-A475-01	LUSC	Non-Small Cell Lung Cancer	Lung Squamous Cell Carcinoma	R249H		OncoKB: NA;CIViC: NA;MyCancerGenome: not present;CancerHotspot: no;3DHotspot: no	MutationAssessor: NA;SIFT: impact: tolerated, score: 0.1;Polyphen-2: impact: benign, score: 0	MutationAssessor: NA	SIFT: impact: tolerated, score: 0.1	Polyphen-2: impact: benign	0	Missense_Mutation	SNP	Gain
PSMA4	Lung Squamous Cell Carcinoma (TCGA, PanCancer Atlas)	TCGA-92-8063-01	LUSC	Non-Small Cell Lung Cancer	Lung Squamous Cell Carcinoma	W159C		OncoKB: NA;CIViC: NA;MyCancerGenome: not present;CancerHotspot: no;3DHotspot: no	MutationAssessor: NA;SIFT: impact: deleterious, score: 0;Polyphen-2: impact: probably_damaging, score: 1	MutationAssessor: NA	SIFT: impact: tolerated, score: 0.95	Polyphen-2: impact: benign	0.01	Missense_Mutation	SNP	Diploid
PSMA4	Lung Squamous Cell Carcinoma (TCGA, PanCancer Atlas)	TCGA-98-A53B-01	LUSC	Non-Small Cell Lung Cancer	Lung Squamous Cell Carcinoma	E243K		OncoKB: NA;CIViC: NA;MyCancerGenome: not present;CancerHotspot: no;3DHotspot: no	MutationAssessor: NA;SIFT: impact: tolerated, score: 0.44;Polyphen-2: impact: possibly_damaging, score: 0.848	MutationAssessor: NA	SIFT: NA	Polyphen-2: NA		Missense_Mutation	SNP	Gain
PSMA4	Bladder Urothelial Carcinoma (TCGA, PanCancer Atlas)	TCGA-DK-AA71-01	BLCA	Bladder Urothelial Carcinoma	Bladder Urothelial Carcinoma	E250K		OncoKB: NA;CIViC: NA;MyCancerGenome: not present;CancerHotspot: no;3DHotspot: no	MutationAssessor: NA;SIFT: impact: tolerated, score: 0.21;Polyphen-2: impact: possibly_damaging, score: 0.848	MutationAssessor: NA	SIFT: impact: tolerated, score: 0.18	Polyphen-2: impact: possibly_damaging	0.57	Missense_Mutation	SNP	Diploid
PSMA4	Bladder Urothelial Carcinoma (TCGA, PanCancer Atlas)	TCGA-FD-A43X-01	BLCA	Bladder Urothelial Carcinoma	Bladder Urothelial Carcinoma	E70*		OncoKB: NA;CIViC: NA;MyCancerGenome: not present;CancerHotspot: no;3DHotspot: no	MutationAssessor: NA;SIFT: NA;Polyphen-2: NA	MutationAssessor: NA	SIFT: impact: tolerated, score: 0.49	Polyphen-2: impact: possibly_damaging	0.9	Nonsense_Mutation	SNP	Gain
PSMA4	Bladder Urothelial Carcinoma (TCGA, PanCancer Atlas)	TCGA-XF-A8HG-01	BLCA	Bladder Urothelial Carcinoma	Bladder Urothelial Carcinoma	I137V		OncoKB: NA;CIViC: NA;MyCancerGenome: not present;CancerHotspot: no;3DHotspot: no	MutationAssessor: NA;SIFT: impact: tolerated, score: 0.18;Polyphen-2: impact: benign, score: 0.007	MutationAssessor: NA	SIFT: impact: tolerated, score: 0.54	Polyphen-2: impact: benign	0.01	Missense_Mutation	SNP	ShallowDel
PSMA4	Liver Hepatocellular Carcinoma (TCGA, PanCancer Atlas)	TCGA-CC-A7IH-01	LIHC	Hepatocellular Carcinoma	Hepatocellular Carcinoma	D116N		OncoKB: NA;CIViC: NA;MyCancerGenome: not present;CancerHotspot: no;3DHotspot: no	MutationAssessor: NA;SIFT: impact: tolerated, score: 0.15;Polyphen-2: impact: benign, score: 0.372	MutationAssessor: NA	SIFT: impact: deleterious, score: 0.03	Polyphen-2: impact: probably_damaging	1	Missense_Mutation	SNP	Diploid
PSMA4	Liver Hepatocellular Carcinoma (TCGA, PanCancer Atlas)	TCGA-G3-A3CK-01	LIHC	Hepatocellular Carcinoma	Hepatocellular Carcinoma	Q119L		OncoKB: NA;CIViC: NA;MyCancerGenome: not present;CancerHotspot: no;3DHotspot: no	MutationAssessor: NA;SIFT: impact: deleterious, score: 0;Polyphen-2: impact: probably_damaging, score: 1	MutationAssessor: NA	SIFT: impact: tolerated, score: 0.79	Polyphen-2: impact: benign	0.02	Missense_Mutation	SNP	Diploid
PSMA4	Prostate Adenocarcinoma (TCGA, PanCancer Atlas)	TCGA-XK-AAIW-01	PRAD	Prostate Adenocarcinoma	Prostate Adenocarcinoma	W139*		OncoKB: NA;CIViC: NA;MyCancerGenome: not present;CancerHotspot: no;3DHotspot: no	MutationAssessor: NA;SIFT: NA;Polyphen-2: NA	MutationAssessor: NA	SIFT: impact: tolerated, score: 0.5	Polyphen-2: impact: benign	0.34	Nonsense_Mutation	SNP	Diploid
PSMA4	Kidney Renal Clear Cell Carcinoma (TCGA, PanCancer Atlas)	TCGA-B0-4823-01	KIRC	Renal Clear Cell Carcinoma	Renal Clear Cell Carcinoma	I194Sfs*6		OncoKB: NA;CIViC: NA;MyCancerGenome: not present;CancerHotspot: no;3DHotspot: no	MutationAssessor: NA;SIFT: NA;Polyphen-2: NA	MutationAssessor: NA	SIFT: impact: deleterious, score: 0.04	Polyphen-2: impact: benign	0.01	Frame_Shift_Ins	INS	Diploid
PSMA4	Uterine Corpus Endometrial Carcinoma (TCGA, PanCancer Atlas)	TCGA-EY-A2OP-01	UCEC	Endometrial Carcinoma	Uterine Endometrioid Carcinoma	R249C		OncoKB: NA;CIViC: NA;MyCancerGenome: not present;CancerHotspot: no;3DHotspot: no	MutationAssessor: NA;SIFT: impact: deleterious, score: 0.04;Polyphen-2: impact: benign, score: 0.106	MutationAssessor: NA	SIFT: impact: tolerated, score: 0.09	Polyphen-2: impact: probably_damaging	1	Missense_Mutation	SNP	Diploid
PSMA4	Uterine Corpus Endometrial Carcinoma (TCGA, PanCancer Atlas)	TCGA-AP-A051-01	UCEC	Endometrial Carcinoma	Uterine Endometrioid Carcinoma	A113V		OncoKB: NA;CIViC: NA;MyCancerGenome: not present;CancerHotspot: no;3DHotspot: no	MutationAssessor: NA;SIFT: impact: tolerated, score: 0.2;Polyphen-2: impact: benign, score: 0.062	MutationAssessor: NA	SIFT: impact: deleterious, score: 0	Polyphen-2: impact: probably_damaging	1	Missense_Mutation	SNP	Diploid
PSMA4	Uterine Corpus Endometrial Carcinoma (TCGA, PanCancer Atlas)	TCGA-D1-A167-01	UCEC	Endometrial Carcinoma	Uterine Endometrioid Carcinoma	R249H		OncoKB: NA;CIViC: NA;MyCancerGenome: not present;CancerHotspot: no;3DHotspot: no	MutationAssessor: NA;SIFT: impact: tolerated, score: 0.1;Polyphen-2: impact: benign, score: 0	MutationAssessor: NA	SIFT: impact: deleterious, score: 0.03	Polyphen-2: impact: probably_damaging	1	Missense_Mutation	SNP	Diploid
PSMA4	Uterine Corpus Endometrial Carcinoma (TCGA, PanCancer Atlas)	TCGA-A5-A0G2-01	UCEC	Endometrial Carcinoma	Uterine Serous Carcinoma/Uterine Papillary Serous Carcinoma	A113S		OncoKB: NA;CIViC: NA;MyCancerGenome: not present;CancerHotspot: no;3DHotspot: no	MutationAssessor: NA;SIFT: impact: tolerated, score: 0.95;Polyphen-2: impact: benign, score: 0.006	MutationAssessor: NA	SIFT: impact: tolerated, score: 0.25	Polyphen-2: impact: benign	0	Missense_Mutation	SNP	Diploid
PSMA4	Uterine Corpus Endometrial Carcinoma (TCGA, PanCancer Atlas)	TCGA-A5-A0G2-01	UCEC	Endometrial Carcinoma	Uterine Serous Carcinoma/Uterine Papillary Serous Carcinoma	Q123*		OncoKB: NA;CIViC: NA;MyCancerGenome: not present;CancerHotspot: no;3DHotspot: no	MutationAssessor: NA;SIFT: NA;Polyphen-2: NA	MutationAssessor: NA	SIFT: impact: tolerated, score: 0.75	Polyphen-2: impact: benign	0.02	Nonsense_Mutation	SNP	Diploid
PSMA4	Uterine Corpus Endometrial Carcinoma (TCGA, PanCancer Atlas)	TCGA-AJ-A5DW-01	UCEC	Endometrial Carcinoma	Uterine Endometrioid Carcinoma	E250D		OncoKB: NA;CIViC: NA;MyCancerGenome: not present;CancerHotspot: no;3DHotspot: no	MutationAssessor: NA;SIFT: impact: tolerated, score: 0.18;Polyphen-2: impact: possibly_damaging, score: 0.568	MutationAssessor: NA	SIFT: impact: tolerated, score: 0.52	Polyphen-2: impact: benign	0	Missense_Mutation	SNP	Diploid
PSMA4	Uterine Corpus Endometrial Carcinoma (TCGA, PanCancer Atlas)	TCGA-AX-A1CE-01	UCEC	Endometrial Carcinoma	Uterine Endometrioid Carcinoma	K252E		OncoKB: NA;CIViC: NA;MyCancerGenome: not present;CancerHotspot: no;3DHotspot: no	MutationAssessor: NA;SIFT: impact: tolerated, score: 0.49;Polyphen-2: impact: possibly_damaging, score: 0.899	MutationAssessor: NA	SIFT: impact: tolerated, score: 0.39	Polyphen-2: impact: benign	0.29	Missense_Mutation	SNP	Diploid
PSMA4	Uterine Corpus Endometrial Carcinoma (TCGA, PanCancer Atlas)	TCGA-AX-A2HD-01	UCEC	Endometrial Carcinoma	Uterine Endometrioid Carcinoma	A169T		OncoKB: NA;CIViC: NA;MyCancerGenome: not present;CancerHotspot: no;3DHotspot: no	MutationAssessor: NA;SIFT: impact: tolerated, score: 0.54;Polyphen-2: impact: benign, score: 0.007	MutationAssessor: NA	SIFT: NA	Polyphen-2: NA		Missense_Mutation	SNP	Amp
PSMA4	Uterine Corpus Endometrial Carcinoma (TCGA, PanCancer Atlas)	TCGA-EO-A3AY-01	UCEC	Endometrial Carcinoma	Uterine Endometrioid Carcinoma	L56I		OncoKB: NA;CIViC: NA;MyCancerGenome: not present;CancerHotspot: no;3DHotspot: no	MutationAssessor: NA;SIFT: impact: deleterious, score: 0.03;Polyphen-2: impact: probably_damaging, score: 1	MutationAssessor: NA	SIFT: impact: tolerated, score: 0.66	Polyphen-2: impact: benign	0	Missense_Mutation	SNP	Diploid
PSMA4	Lung Adenocarcinoma (TCGA, PanCancer Atlas)	TCGA-05-4427-01	LUAD	Non-Small Cell Lung Cancer	Lung Adenocarcinoma	A169S		OncoKB: NA;CIViC: NA;MyCancerGenome: not present;CancerHotspot: no;3DHotspot: no	MutationAssessor: NA;SIFT: impact: tolerated, score: 0.79;Polyphen-2: impact: benign, score: 0.015	MutationAssessor: NA	SIFT: impact: deleterious, score: 0.04	Polyphen-2: impact: benign	0.11	Missense_Mutation	SNP	Diploid
PSMA4	Lung Adenocarcinoma (TCGA, PanCancer Atlas)	TCGA-78-7153-01	LUAD	Non-Small Cell Lung Cancer	Lung Adenocarcinoma	I79L		OncoKB: NA;CIViC: NA;MyCancerGenome: not present;CancerHotspot: no;3DHotspot: no	MutationAssessor: NA;SIFT: impact: tolerated, score: 0.5;Polyphen-2: impact: benign, score: 0.337	MutationAssessor: NA	SIFT: impact: deleterious, score: 0	Polyphen-2: impact: probably_damaging	1	Missense_Mutation	SNP	ShallowDel
PSMA4	Skin Cutaneous Melanoma (TCGA, PanCancer Atlas)	TCGA-FW-A5DX-01	SKCM	Melanoma	Cutaneous Melanoma	E253G		OncoKB: NA;CIViC: NA;MyCancerGenome: not present;CancerHotspot: no;3DHotspot: no	MutationAssessor: NA;SIFT: impact: deleterious, score: 0.04;Polyphen-2: impact: benign, score: 0.014	MutationAssessor: NA	SIFT: NA	Polyphen-2: NA		Missense_Mutation	SNP
PSMA4	Skin Cutaneous Melanoma (TCGA, PanCancer Atlas)	TCGA-DA-A1HV-06	SKCM	Melanoma	Cutaneous Melanoma	L56F		OncoKB: NA;CIViC: NA;MyCancerGenome: not present;CancerHotspot: no;3DHotspot: no	MutationAssessor: NA;SIFT: impact: tolerated, score: 0.09;Polyphen-2: impact: probably_damaging, score: 1	MutationAssessor: NA	SIFT: impact: tolerated, score: 0.1	Polyphen-2: impact: benign	0	Missense_Mutation	SNP	Gain
PSMA4	Skin Cutaneous Melanoma (TCGA, PanCancer Atlas)	TCGA-FS-A1ZZ-06	SKCM	Melanoma	Cutaneous Melanoma	P129L		OncoKB: NA;CIViC: NA;MyCancerGenome: not present;CancerHotspot: no;3DHotspot: no	MutationAssessor: NA;SIFT: impact: deleterious, score: 0;Polyphen-2: impact: probably_damaging, score: 1	MutationAssessor: NA	SIFT: NA	Polyphen-2: NA		Missense_Mutation	SNP	Diploid
PSMA4	Skin Cutaneous Melanoma (TCGA, PanCancer Atlas)	TCGA-GN-A26C-01	SKCM	Melanoma	Cutaneous Melanoma	G36R		OncoKB: NA;CIViC: NA;MyCancerGenome: not present;CancerHotspot: no;3DHotspot: no	MutationAssessor: NA;SIFT: impact: deleterious, score: 0.03;Polyphen-2: impact: probably_damaging, score: 0.999	MutationAssessor: NA	SIFT: NA	Polyphen-2: NA		Missense_Mutation	SNP
PSMA4	Skin Cutaneous Melanoma (TCGA, PanCancer Atlas)	TCGA-ER-A42L-06	SKCM	Melanoma	Cutaneous Melanoma	Q235L		OncoKB: NA;CIViC: NA;MyCancerGenome: not present;CancerHotspot: no;3DHotspot: no	MutationAssessor: NA;SIFT: impact: tolerated, score: 0.25;Polyphen-2: impact: benign, score: 0	MutationAssessor: NA	SIFT: NA	Polyphen-2: NA		Missense_Mutation	SNP	Gain
PSMA4	Stomach Adenocarcinoma (TCGA, PanCancer Atlas)	TCGA-BR-6452-01	STAD	Esophagogastric Adenocarcinoma	Stomach Adenocarcinoma	V59A		OncoKB: NA;CIViC: NA;MyCancerGenome: not present;CancerHotspot: no;3DHotspot: no	MutationAssessor: NA;SIFT: impact: tolerated, score: 0.75;Polyphen-2: impact: benign, score: 0.019	MutationAssessor: NA	SIFT: impact: deleterious, score: 0	Polyphen-2: impact: probably_damaging	1	Missense_Mutation	SNP	Diploid
PSMA4	Stomach Adenocarcinoma (TCGA, PanCancer Atlas)	TCGA-BR-6452-01	STAD	Esophagogastric Adenocarcinoma	Stomach Adenocarcinoma	X96_splice		OncoKB: NA;CIViC: NA;MyCancerGenome: not present;CancerHotspot: no;3DHotspot: no	MutationAssessor: NA;SIFT: NA;Polyphen-2: NA	MutationAssessor: NA	SIFT: NA	Polyphen-2: NA		Splice_Site	SNP	Diploid
PSMA4	Stomach Adenocarcinoma (TCGA, PanCancer Atlas)	TCGA-BR-6452-01	STAD	Esophagogastric Adenocarcinoma	Stomach Adenocarcinoma	K229E		OncoKB: NA;CIViC: NA;MyCancerGenome: not present;CancerHotspot: no;3DHotspot: no	MutationAssessor: NA;SIFT: impact: tolerated, score: 0.52;Polyphen-2: impact: benign, score: 0	MutationAssessor: NA	SIFT: impact: deleterious, score: 0	Polyphen-2: impact: probably_damaging	0.91	Missense_Mutation	SNP	Diploid
PSMA4	Stomach Adenocarcinoma (TCGA, PanCancer Atlas)	TCGA-BR-8382-01	STAD	Esophagogastric Adenocarcinoma	Stomach Adenocarcinoma	I105M		OncoKB: NA;CIViC: NA;MyCancerGenome: not present;CancerHotspot: no;3DHotspot: no	MutationAssessor: NA;SIFT: impact: tolerated, score: 0.39;Polyphen-2: impact: benign, score: 0.286	MutationAssessor: NA	SIFT: impact: deleterious, score: 0	Polyphen-2: impact: possibly_damaging	0.51	Missense_Mutation	SNP	Diploid
PSMA4	Stomach Adenocarcinoma (TCGA, PanCancer Atlas)	TCGA-MX-A5UJ-01	STAD	Esophagogastric Adenocarcinoma	Tubular Stomach Adenocarcinoma	K239Nfs*60		OncoKB: NA;CIViC: NA;MyCancerGenome: not present;CancerHotspot: no;3DHotspot: no	MutationAssessor: NA;SIFT: NA;Polyphen-2: NA	MutationAssessor: NA	SIFT: impact: deleterious, score: 0.01	Polyphen-2: impact: probably_damaging	0.98	Frame_Shift_Del	DEL	Diploid
PSMA4	Breast Invasive Carcinoma (TCGA, PanCancer Atlas)	TCGA-E9-A6HE-01	BRCA	Invasive Breast Carcinoma	Breast Invasive Lobular Carcinoma	F60L		OncoKB: NA;CIViC: NA;MyCancerGenome: not present;CancerHotspot: no;3DHotspot: no	MutationAssessor: NA;SIFT: impact: tolerated, score: 0.66;Polyphen-2: impact: benign, score: 0.001	MutationAssessor: NA	SIFT: impact: deleterious, score: 0.01	Polyphen-2: impact: probably_damaging	1	Missense_Mutation	SNP	Diploid
PSMA4	Colorectal Adenocarcinoma (TCGA, PanCancer Atlas)	TCGA-AA-3715-01	COAD	Colorectal Adenocarcinoma	Colon Adenocarcinoma	R249C		OncoKB: NA;CIViC: NA;MyCancerGenome: not present;CancerHotspot: no;3DHotspot: no	MutationAssessor: NA;SIFT: impact: deleterious, score: 0.04;Polyphen-2: impact: benign, score: 0.106	MutationAssessor: NA	SIFT: impact: tolerated, score: 0.12	Polyphen-2: impact: benign	0	Missense_Mutation	SNP	Diploid
PSMA4	Colorectal Adenocarcinoma (TCGA, PanCancer Atlas)	TCGA-AD-6895-01	COAD	Colorectal Adenocarcinoma	Colon Adenocarcinoma	R128H		OncoKB: NA;CIViC: NA;MyCancerGenome: not present;CancerHotspot: no;3DHotspot: no	MutationAssessor: NA;SIFT: impact: deleterious, score: 0;Polyphen-2: impact: probably_damaging, score: 0.999	MutationAssessor: NA	SIFT: NA	Polyphen-2: NA		Missense_Mutation	SNP	Diploid
PSMA4	Colorectal Adenocarcinoma (TCGA, PanCancer Atlas)	TCGA-CA-6717-01	COAD	Colorectal Adenocarcinoma	Mucinous Adenocarcinoma of the Colon and Rectum	E253*		OncoKB: NA;CIViC: NA;MyCancerGenome: not present;CancerHotspot: no;3DHotspot: no	MutationAssessor: NA;SIFT: NA;Polyphen-2: NA	MutationAssessor: NA	SIFT: impact: deleterious, score: 0.01	Polyphen-2: impact: possibly_damaging	0.49	Nonsense_Mutation	SNP	Diploid
PSMA4	Cervical Squamous Cell Carcinoma (TCGA, PanCancer Atlas)	TCGA-2W-A8YY-01	CESC	Cervical Squamous Cell Carcinoma	Cervical Squamous Cell Carcinoma	R249H		OncoKB: NA;CIViC: NA;MyCancerGenome: not present;CancerHotspot: no;3DHotspot: no	MutationAssessor: NA;SIFT: impact: tolerated, score: 0.1;Polyphen-2: impact: benign, score: 0	MutationAssessor: NA	SIFT: impact: deleterious, score: 0.01	Polyphen-2: impact: benign	0.18	Missense_Mutation	SNP	Diploid
PSMA5	Ovarian Serous Cystadenocarcinoma (TCGA, PanCancer Atlas)	TCGA-36-1574-01	OV	Ovarian Epithelial Tumor	Serous Ovarian Cancer	NOTCH2-PSMA5		OncoKB: Unknown, level NA, resistance NA;CIViC: NA;MyCancerGenome: not present;CancerHotspot: no;3DHotspot: no	MutationAssessor: NA;SIFT: NA;Polyphen-2: NA	MutationAssessor: NA	SIFT: impact: deleterious, score: 0	Polyphen-2: impact: probably_damaging	0.99	fusion	FUSION	Diploid
PSMA5	Uterine Corpus Endometrial Carcinoma (TCGA, PanCancer Atlas)	TCGA-PG-A7D5-01	UCEC	Endometrial Carcinoma	Uterine Serous Carcinoma/Uterine Papillary Serous Carcinoma	SORT1-PSMA5		OncoKB: Unknown, level NA, resistance NA;CIViC: NA;MyCancerGenome: not present;CancerHotspot: no;3DHotspot: no	MutationAssessor: NA;SIFT: NA;Polyphen-2: NA	MutationAssessor: NA	SIFT: impact: deleterious, score: 0	Polyphen-2: impact: probably_damaging	0.91	fusion	FUSION	Gain
PSMA5	Breast Invasive Carcinoma (TCGA, PanCancer Atlas)	TCGA-AC-A5XS-01	BRCA	Invasive Breast Carcinoma	Breast Invasive Lobular Carcinoma	PSMA5-EIF2S2P5		OncoKB: Unknown, level NA, resistance NA;CIViC: NA;MyCancerGenome: not present;CancerHotspot: no;3DHotspot: no	MutationAssessor: NA;SIFT: NA;Polyphen-2: NA	MutationAssessor: NA	SIFT: NA	Polyphen-2: NA		fusion	FUSION	Gain
PSMA5	Glioblastoma Multiforme (TCGA, PanCancer Atlas)	TCGA-06-0132-01	GBM	Glioblastoma	Glioblastoma Multiforme	G19R		OncoKB: NA;CIViC: NA;MyCancerGenome: not present;CancerHotspot: no;3DHotspot: no	MutationAssessor: NA;SIFT: impact: deleterious, score: 0;Polyphen-2: impact: probably_damaging, score: 1	MutationAssessor: NA	SIFT: impact: deleterious, score: 0	Polyphen-2: impact: possibly_damaging	0.58	Missense_Mutation	SNP	Diploid
PSMA5	Lung Squamous Cell Carcinoma (TCGA, PanCancer Atlas)	TCGA-39-5031-01	LUSC	Non-Small Cell Lung Cancer	Lung Squamous Cell Carcinoma	I238M		OncoKB: NA;CIViC: NA;MyCancerGenome: not present;CancerHotspot: no;3DHotspot: no	MutationAssessor: NA;SIFT: NA;Polyphen-2: NA	MutationAssessor: NA	SIFT: impact: deleterious, score: 0.02	Polyphen-2: impact: benign	0.3	Missense_Mutation	SNP	Diploid
PSMA5	Bladder Urothelial Carcinoma (TCGA, PanCancer Atlas)	TCGA-XF-A9SY-01	BLCA	Bladder Urothelial Carcinoma	Bladder Urothelial Carcinoma	E18K		OncoKB: NA;CIViC: NA;MyCancerGenome: not present;CancerHotspot: no;3DHotspot: no	MutationAssessor: NA;SIFT: impact: deleterious, score: 0;Polyphen-2: impact: probably_damaging, score: 0.909	MutationAssessor: NA	SIFT: impact: deleterious, score: 0	Polyphen-2: impact: probably_damaging	0.99	Missense_Mutation	SNP	Diploid
PSMA5	Bladder Urothelial Carcinoma (TCGA, PanCancer Atlas)	TCGA-GC-A3RC-01	BLCA	Bladder Urothelial Carcinoma	Bladder Urothelial Carcinoma	V50L		OncoKB: NA;CIViC: NA;MyCancerGenome: not present;CancerHotspot: no;3DHotspot: no	MutationAssessor: NA;SIFT: impact: deleterious, score: 0;Polyphen-2: impact: possibly_damaging, score: 0.511	MutationAssessor: NA	SIFT: impact: deleterious, score: 0	Polyphen-2: impact: possibly_damaging	0.76	Missense_Mutation	SNP	Diploid
PSMA5	Bladder Urothelial Carcinoma (TCGA, PanCancer Atlas)	TCGA-KQ-A41R-01	BLCA	Bladder Urothelial Carcinoma	Bladder Urothelial Carcinoma	S35F		OncoKB: NA;CIViC: NA;MyCancerGenome: not present;CancerHotspot: no;3DHotspot: no	MutationAssessor: NA;SIFT: impact: deleterious, score: 0.01;Polyphen-2: impact: probably_damaging, score: 0.981	MutationAssessor: NA	SIFT: NA	Polyphen-2: NA		Missense_Mutation	SNP	Diploid
PSMA5	Bladder Urothelial Carcinoma (TCGA, PanCancer Atlas)	TCGA-UY-A9PF-01	BLCA	Bladder Urothelial Carcinoma	Bladder Urothelial Carcinoma	D9N		OncoKB: NA;CIViC: NA;MyCancerGenome: not present;CancerHotspot: no;3DHotspot: no	MutationAssessor: NA;SIFT: impact: deleterious, score: 0.01;Polyphen-2: impact: probably_damaging, score: 0.995	MutationAssessor: NA	SIFT: NA	Polyphen-2: NA		Missense_Mutation	SNP	Diploid
PSMA5	Bladder Urothelial Carcinoma (TCGA, PanCancer Atlas)	TCGA-DK-A6AW-01	BLCA	Bladder Urothelial Carcinoma	Bladder Urothelial Carcinoma	A72V		OncoKB: NA;CIViC: NA;MyCancerGenome: not present;CancerHotspot: no;3DHotspot: no	MutationAssessor: NA;SIFT: impact: tolerated, score: 0.12;Polyphen-2: impact: benign, score: 0.001	MutationAssessor: NA	SIFT: impact: tolerated, score: 0.06	Polyphen-2: impact: benign	0.44	Missense_Mutation	SNP	Diploid
PSMA5	Liver Hepatocellular Carcinoma (TCGA, PanCancer Atlas)	TCGA-DD-AAW0-01	LIHC	Hepatocellular Carcinoma	Hepatocellular Carcinoma	T230S		OncoKB: NA;CIViC: NA;MyCancerGenome: not present;CancerHotspot: no;3DHotspot: no	MutationAssessor: NA;SIFT: NA;Polyphen-2: NA	MutationAssessor: NA	SIFT: impact: deleterious, score: 0	Polyphen-2: impact: probably_damaging	0.99	Missense_Mutation	SNP	Diploid
PSMA5	Liver Hepatocellular Carcinoma (TCGA, PanCancer Atlas)	TCGA-DD-AAE6-01	LIHC	Hepatocellular Carcinoma	Hepatocellular Carcinoma	I64T		OncoKB: NA;CIViC: NA;MyCancerGenome: not present;CancerHotspot: no;3DHotspot: no	MutationAssessor: NA;SIFT: impact: deleterious, score: 0.01;Polyphen-2: impact: possibly_damaging, score: 0.486	MutationAssessor: NA	SIFT: NA	Polyphen-2: NA		Missense_Mutation	SNP	Diploid
PSMA5	Thymoma (TCGA, PanCancer Atlas)	TCGA-4V-A9QR-01	THYM	Thymic Epithelial Tumor	Thymoma	T36A		OncoKB: NA;CIViC: NA;MyCancerGenome: not present;CancerHotspot: no;3DHotspot: no	MutationAssessor: NA;SIFT: impact: deleterious, score: 0.01;Polyphen-2: impact: benign, score: 0.179	MutationAssessor: NA	SIFT: impact: tolerated, score: 0.62	Polyphen-2: impact: benign	0.02	Missense_Mutation	SNP	Diploid
PSMA5	Uterine Corpus Endometrial Carcinoma (TCGA, PanCancer Atlas)	TCGA-AP-A059-01	UCEC	Endometrial Carcinoma	Uterine Endometrioid Carcinoma	G45D		OncoKB: NA;CIViC: NA;MyCancerGenome: not present;CancerHotspot: no;3DHotspot: no	MutationAssessor: NA;SIFT: impact: deleterious, score: 0;Polyphen-2: impact: probably_damaging, score: 0.992	MutationAssessor: NA	SIFT: NA	Polyphen-2: NA		Missense_Mutation	SNP	Diploid
PSMA5	Uterine Corpus Endometrial Carcinoma (TCGA, PanCancer Atlas)	TCGA-AP-A1E0-01	UCEC	Endometrial Carcinoma	Uterine Endometrioid Carcinoma	E18K		OncoKB: NA;CIViC: NA;MyCancerGenome: not present;CancerHotspot: no;3DHotspot: no	MutationAssessor: NA;SIFT: impact: deleterious, score: 0;Polyphen-2: impact: probably_damaging, score: 0.909	MutationAssessor: NA	SIFT: impact: tolerated, score: 0.32	Polyphen-2: impact: benign	0.02	Missense_Mutation	SNP	Diploid
PSMA5	Uterine Corpus Endometrial Carcinoma (TCGA, PanCancer Atlas)	TCGA-B5-A11E-01	UCEC	Endometrial Carcinoma	Uterine Endometrioid Carcinoma	R168*		OncoKB: NA;CIViC: NA;MyCancerGenome: not present;CancerHotspot: no;3DHotspot: no	MutationAssessor: NA;SIFT: NA;Polyphen-2: NA	MutationAssessor: NA	SIFT: impact: deleterious, score: 0.01	Polyphen-2: impact: possibly_damaging	0.9	Nonsense_Mutation	SNP	Diploid
PSMA5	Uterine Corpus Endometrial Carcinoma (TCGA, PanCancer Atlas)	TCGA-B5-A1MR-01	UCEC	Endometrial Carcinoma	Uterine Endometrioid Carcinoma	K86N		OncoKB: NA;CIViC: NA;MyCancerGenome: not present;CancerHotspot: no;3DHotspot: no	MutationAssessor: NA;SIFT: impact: deleterious, score: 0;Polyphen-2: impact: possibly_damaging, score: 0.575	MutationAssessor: NA	SIFT: NA	Polyphen-2: NA		Missense_Mutation	SNP	Diploid
PSMA5	Lung Adenocarcinoma (TCGA, PanCancer Atlas)	TCGA-05-4382-01	LUAD	Non-Small Cell Lung Cancer	Lung Adenocarcinoma	H155N		OncoKB: NA;CIViC: NA;MyCancerGenome: not present;CancerHotspot: no;3DHotspot: no	MutationAssessor: NA;SIFT: impact: deleterious, score: 0.02;Polyphen-2: impact: benign, score: 0.303	MutationAssessor: NA	SIFT: NA	Polyphen-2: NA		Missense_Mutation	SNP	Diploid
PSMA5	Esophageal Adenocarcinoma (TCGA, PanCancer Atlas)	TCGA-Z6-AAPN-01	ESCA	Esophageal Squamous Cell Carcinoma	Esophageal Squamous Cell Carcinoma	R93T		OncoKB: NA;CIViC: NA;MyCancerGenome: not present;CancerHotspot: no;3DHotspot: no	MutationAssessor: NA;SIFT: impact: deleterious, score: 0;Polyphen-2: impact: probably_damaging, score: 0.989	MutationAssessor: NA	SIFT: NA	Polyphen-2: NA		Missense_Mutation	SNP	Gain
PSMA5	Skin Cutaneous Melanoma (TCGA, PanCancer Atlas)	TCGA-EE-A2MS-06	SKCM	Melanoma	Cutaneous Melanoma	S6F		OncoKB: NA;CIViC: NA;MyCancerGenome: not present;CancerHotspot: no;3DHotspot: no	MutationAssessor: NA;SIFT: impact: deleterious, score: 0;Polyphen-2: impact: possibly_damaging, score: 0.764	MutationAssessor: NA	SIFT: NA	Polyphen-2: NA		Missense_Mutation	SNP	ShallowDel
PSMA5	Skin Cutaneous Melanoma (TCGA, PanCancer Atlas)	TCGA-EB-A553-01	SKCM	Melanoma	Cutaneous Melanoma	D240A		OncoKB: NA;CIViC: NA;MyCancerGenome: not present;CancerHotspot: no;3DHotspot: no	MutationAssessor: NA;SIFT: NA;Polyphen-2: NA	MutationAssessor: NA	SIFT: NA	Polyphen-2: NA		Missense_Mutation	SNP
PSMA5	Cholangiocarcinoma (TCGA, PanCancer Atlas)	TCGA-3X-AAVE-01	CHOL	Cholangiocarcinoma	Intrahepatic Cholangiocarcinoma	Q23*		OncoKB: NA;CIViC: NA;MyCancerGenome: not present;CancerHotspot: no;3DHotspot: no	MutationAssessor: NA;SIFT: NA;Polyphen-2: NA	MutationAssessor: NA	SIFT: NA	Polyphen-2: NA		Nonsense_Mutation	SNP	Gain
PSMA5	Breast Invasive Carcinoma (TCGA, PanCancer Atlas)	TCGA-E9-A1R4-01	BRCA	Invasive Breast Carcinoma	Breast Invasive Ductal Carcinoma	L191F		OncoKB: NA;CIViC: NA;MyCancerGenome: not present;CancerHotspot: no;3DHotspot: no	MutationAssessor: NA;SIFT: impact: tolerated, score: 0.06;Polyphen-2: impact: benign, score: 0.435	MutationAssessor: NA	SIFT: impact: deleterious, score: 0.01	Polyphen-2: impact: probably_damaging	0.93	Missense_Mutation	SNP	Diploid
PSMA5	Breast Invasive Carcinoma (TCGA, PanCancer Atlas)	TCGA-AR-A0U1-01	BRCA	Invasive Breast Carcinoma	Breast Invasive Ductal Carcinoma	M189R		OncoKB: NA;CIViC: NA;MyCancerGenome: not present;CancerHotspot: no;3DHotspot: no	MutationAssessor: NA;SIFT: impact: deleterious, score: 0;Polyphen-2: impact: probably_damaging, score: 0.986	MutationAssessor: NA	SIFT: impact: deleterious, score: 0.01	Polyphen-2: impact: benign	0.18	Missense_Mutation	SNP	Gain
PSMA5	Pancreatic Adenocarcinoma (TCGA, PanCancer Atlas)	TCGA-IB-7651-01	PAAD	Pancreatic Adenocarcinoma	Pancreatic Adenocarcinoma	W100*		OncoKB: NA;CIViC: NA;MyCancerGenome: not present;CancerHotspot: no;3DHotspot: no	MutationAssessor: NA;SIFT: NA;Polyphen-2: NA	MutationAssessor: NA	SIFT: impact: tolerated, score: 0.45	Polyphen-2: impact: benign	0.01	Nonsense_Mutation	SNP	ShallowDel
PSMA5	Colorectal Adenocarcinoma (TCGA, PanCancer Atlas)	TCGA-AA-A010-01	COAD	Colorectal Adenocarcinoma	Colon Adenocarcinoma	K196T		OncoKB: NA;CIViC: NA;MyCancerGenome: not present;CancerHotspot: no;3DHotspot: no	MutationAssessor: NA;SIFT: impact: tolerated, score: 0.62;Polyphen-2: impact: benign, score: 0.021	MutationAssessor: NA	SIFT: impact: deleterious, score: 0	Polyphen-2: impact: probably_damaging	1	Missense_Mutation	SNP	Diploid
PSMA5	Colorectal Adenocarcinoma (TCGA, PanCancer Atlas)	TCGA-D5-6920-01	COAD	Colorectal Adenocarcinoma	Colon Adenocarcinoma	V184_Y185insN		OncoKB: NA;CIViC: NA;MyCancerGenome: not present;CancerHotspot: no;3DHotspot: no	MutationAssessor: NA;SIFT: NA;Polyphen-2: NA	MutationAssessor: NA	SIFT: impact: deleterious, score: 0.02	Polyphen-2: impact: benign	0.07	In_Frame_Ins	INS	Diploid
PSMA5	Head and Neck Squamous Cell Carcinoma (TCGA, PanCancer Atlas)	TCGA-CV-A6JY-01	HNSC	Head and Neck Squamous Cell Carcinoma	Head and Neck Squamous Cell Carcinoma	V116L		OncoKB: NA;CIViC: NA;MyCancerGenome: not present;CancerHotspot: no;3DHotspot: no	MutationAssessor: NA;SIFT: impact: tolerated, score: 0.32;Polyphen-2: impact: benign, score: 0.015	MutationAssessor: NA	SIFT: impact: deleterious, score: 0	Polyphen-2: impact: benign	0.29	Missense_Mutation	SNP	Diploid
PSMA5	Cervical Squamous Cell Carcinoma (TCGA, PanCancer Atlas)	TCGA-VS-A94Z-01	CESC	Cervical Squamous Cell Carcinoma	Cervical Squamous Cell Carcinoma	Q23E		OncoKB: NA;CIViC: NA;MyCancerGenome: not present;CancerHotspot: no;3DHotspot: no	MutationAssessor: NA;SIFT: impact: deleterious, score: 0.01;Polyphen-2: impact: possibly_damaging, score: 0.899	MutationAssessor: NA	SIFT: impact: deleterious, score: 0.04	Polyphen-2: impact: benign	0.11	Missense_Mutation	SNP	Diploid
PSMA6	Uterine Corpus Endometrial Carcinoma (TCGA, PanCancer Atlas)	TCGA-B5-A5OD-01	UCEC	Endometrial Carcinoma	Uterine Serous Carcinoma/Uterine Papillary Serous Carcinoma	USP54-PSMA6		OncoKB: Unknown, level NA, resistance NA;CIViC: NA;MyCancerGenome: not present;CancerHotspot: no;3DHotspot: no	MutationAssessor: NA;SIFT: NA;Polyphen-2: NA	MutationAssessor: NA	SIFT: impact: deleterious, score: 0.04	Polyphen-2: impact: benign	0.11	fusion	FUSION	ShallowDel
PSMA6	Breast Invasive Carcinoma (TCGA, PanCancer Atlas)	TCGA-A8-A09A-01	BRCA	Invasive Breast Carcinoma	Breast Invasive Ductal Carcinoma	VMP1-PSMA6		OncoKB: Unknown, level NA, resistance NA;CIViC: NA;MyCancerGenome: not present;CancerHotspot: no;3DHotspot: no	MutationAssessor: NA;SIFT: NA;Polyphen-2: NA	MutationAssessor: NA	SIFT: impact: deleterious, score: 0.03	Polyphen-2: impact: benign	0.23	fusion	FUSION	Gain
PSMA6	Breast Invasive Carcinoma (TCGA, PanCancer Atlas)	TCGA-B6-A0IO-01	BRCA	Invasive Breast Carcinoma	Breast Invasive Ductal Carcinoma	PRPF39-PSMA6		OncoKB: Unknown, level NA, resistance NA;CIViC: NA;MyCancerGenome: not present;CancerHotspot: no;3DHotspot: no	MutationAssessor: NA;SIFT: NA;Polyphen-2: NA	MutationAssessor: NA	SIFT: impact: deleterious, score: 0	Polyphen-2: impact: probably_damaging	0.99	fusion	FUSION	ShallowDel
PSMA6	Pancreatic Adenocarcinoma (TCGA, PanCancer Atlas)	TCGA-2J-AABO-01	PAAD	Pancreatic Adenocarcinoma	Pancreatic Adenocarcinoma	NUBPL-PSMA6		OncoKB: Unknown, level NA, resistance NA;CIViC: NA;MyCancerGenome: not present;CancerHotspot: no;3DHotspot: no	MutationAssessor: NA;SIFT: NA;Polyphen-2: NA	MutationAssessor: NA	SIFT: impact: deleterious, score: 0	Polyphen-2: impact: probably_damaging	0.94	fusion	FUSION	Gain
PSMA6	Cervical Squamous Cell Carcinoma (TCGA, PanCancer Atlas)	TCGA-C5-A3HD-01	CESC	Cervical Squamous Cell Carcinoma	Cervical Squamous Cell Carcinoma	FAM177A1-PSMA6		OncoKB: Unknown, level NA, resistance NA;CIViC: NA;MyCancerGenome: not present;CancerHotspot: no;3DHotspot: no	MutationAssessor: NA;SIFT: NA;Polyphen-2: NA	MutationAssessor: NA	SIFT: impact: tolerated, score: 0.4	Polyphen-2: impact: benign	0.01	fusion	FUSION	Diploid
PSMA6	Cervical Squamous Cell Carcinoma (TCGA, PanCancer Atlas)	TCGA-VS-A9UP-01	CESC	Cervical Adenocarcinoma	Mucinous Carcinoma	PSMA6-SNX6	rs = 0.233, q-value = 3.872e-4	OncoKB: Unknown, level NA, resistance NA;CIViC: NA;MyCancerGenome: not present;CancerHotspot: no;3DHotspot: no	MutationAssessor: NA;SIFT: NA;Polyphen-2: NA	MutationAssessor: NA	SIFT: NA	Polyphen-2: NA		fusion	FUSION	Amp
PSMA6	Thyroid Carcinoma (TCGA, PanCancer Atlas)	TCGA-EM-A2CN-01	THCA	Well-Differentiated Thyroid Cancer	Papillary Thyroid Cancer	D10E		OncoKB: NA;CIViC: NA;MyCancerGenome: not present;CancerHotspot: no;3DHotspot: no	MutationAssessor: NA;SIFT: impact: deleterious, score: 0.01;Polyphen-2: impact: probably_damaging, score: 0.931	MutationAssessor: NA	SIFT: impact: deleterious, score: 0.01	Polyphen-2: impact: possibly_damaging	0.91	Missense_Mutation	SNP	Diploid
PSMA6	Bladder Urothelial Carcinoma (TCGA, PanCancer Atlas)	TCGA-BT-A0YX-01	BLCA	Bladder Urothelial Carcinoma	Bladder Urothelial Carcinoma	E244Q		OncoKB: NA;CIViC: NA;MyCancerGenome: not present;CancerHotspot: no;3DHotspot: no	MutationAssessor: NA;SIFT: impact: deleterious, score: 0.01;Polyphen-2: impact: benign, score: 0.177	MutationAssessor: NA	SIFT: impact: tolerated, score: 0.11	Polyphen-2: impact: benign	0.01	Missense_Mutation	SNP	Diploid
PSMA6	Bladder Urothelial Carcinoma (TCGA, PanCancer Atlas)	TCGA-E7-A677-01	BLCA	Bladder Urothelial Carcinoma	Bladder Urothelial Carcinoma	N33S		OncoKB: NA;CIViC: NA;MyCancerGenome: not present;CancerHotspot: no;3DHotspot: no	MutationAssessor: NA;SIFT: impact: tolerated, score: 0.45;Polyphen-2: impact: benign, score: 0.005	MutationAssessor: NA	SIFT: impact: deleterious, score: 0	Polyphen-2: impact: probably_damaging	0.97	Missense_Mutation	SNP	Diploid
PSMA6	Bladder Urothelial Carcinoma (TCGA, PanCancer Atlas)	TCGA-KQ-A41R-01	BLCA	Bladder Urothelial Carcinoma	Bladder Urothelial Carcinoma	D155N		OncoKB: NA;CIViC: NA;MyCancerGenome: not present;CancerHotspot: no;3DHotspot: no	MutationAssessor: NA;SIFT: impact: deleterious, score: 0;Polyphen-2: impact: probably_damaging, score: 0.998	MutationAssessor: NA	SIFT: impact: deleterious, score: 0.04	Polyphen-2: impact: benign	0.04	Missense_Mutation	SNP	ShallowDel
PSMA6	Bladder Urothelial Carcinoma (TCGA, PanCancer Atlas)	TCGA-XF-A9SP-01	BLCA	Bladder Urothelial Carcinoma	Bladder Urothelial Carcinoma	R245T		OncoKB: NA;CIViC: NA;MyCancerGenome: not present;CancerHotspot: no;3DHotspot: no	MutationAssessor: NA;SIFT: impact: deleterious, score: 0.02;Polyphen-2: impact: benign, score: 0.074	MutationAssessor: NA	SIFT: impact: deleterious, score: 0.04	Polyphen-2: impact: possibly_damaging	0.52	Missense_Mutation	SNP	Gain
PSMA6	Bladder Urothelial Carcinoma (TCGA, PanCancer Atlas)	TCGA-XF-A9T8-01	BLCA	Bladder Urothelial Carcinoma	Bladder Urothelial Carcinoma	E244K		OncoKB: NA;CIViC: NA;MyCancerGenome: not present;CancerHotspot: no;3DHotspot: no	MutationAssessor: NA;SIFT: impact: deleterious, score: 0;Polyphen-2: impact: benign, score: 0.286	MutationAssessor: NA	SIFT: impact: deleterious, score: 0	Polyphen-2: impact: probably_damaging	1	Missense_Mutation	SNP	Diploid
PSMA6	Bladder Urothelial Carcinoma (TCGA, PanCancer Atlas)	TCGA-XF-AAMX-01	BLCA	Bladder Urothelial Carcinoma	Bladder Urothelial Carcinoma	E174D		OncoKB: NA;CIViC: NA;MyCancerGenome: not present;CancerHotspot: no;3DHotspot: no	MutationAssessor: NA;SIFT: impact: deleterious, score: 0.04;Polyphen-2: impact: benign, score: 0.105	MutationAssessor: NA	SIFT: impact: deleterious, score: 0	Polyphen-2: impact: possibly_damaging	0.85	Missense_Mutation	SNP	Amp
PSMA6	Prostate Adenocarcinoma (TCGA, PanCancer Atlas)	TCGA-XQ-A8TA-01	PRAD	Prostate Adenocarcinoma	Prostate Adenocarcinoma	E174D		OncoKB: NA;CIViC: NA;MyCancerGenome: not present;CancerHotspot: no;3DHotspot: no	MutationAssessor: NA;SIFT: impact: deleterious, score: 0.04;Polyphen-2: impact: benign, score: 0.105	MutationAssessor: NA	SIFT: impact: deleterious, score: 0.05	Polyphen-2: impact: possibly_damaging	0.59	Missense_Mutation	SNP	Diploid
PSMA6	Kidney Renal Clear Cell Carcinoma (TCGA, PanCancer Atlas)	TCGA-DV-5566-01	KIRC	Renal Clear Cell Carcinoma	Renal Clear Cell Carcinoma	I32L		OncoKB: NA;CIViC: NA;MyCancerGenome: not present;CancerHotspot: no;3DHotspot: no	MutationAssessor: NA;SIFT: impact: deleterious, score: 0.03;Polyphen-2: impact: benign, score: 0.229	MutationAssessor: NA	SIFT: impact: deleterious, score: 0	Polyphen-2: impact: benign	0.19	Missense_Mutation	SNP	Diploid
PSMA6	Kidney Renal Clear Cell Carcinoma (TCGA, PanCancer Atlas)	TCGA-B0-4811-01	KIRC	Renal Clear Cell Carcinoma	Renal Clear Cell Carcinoma	X26_splice		OncoKB: NA;CIViC: NA;MyCancerGenome: not present;CancerHotspot: no;3DHotspot: no	MutationAssessor: NA;SIFT: NA;Polyphen-2: NA	MutationAssessor: NA	SIFT: impact: deleterious, score: 0	Polyphen-2: impact: probably_damaging	score: 0.954	Splice_Site	SNP	Diploid
PSMA6	Kidney Renal Clear Cell Carcinoma (TCGA, PanCancer Atlas)	TCGA-CJ-6032-01	KIRC	Renal Clear Cell Carcinoma	Renal Clear Cell Carcinoma	V25A		OncoKB: NA;CIViC: NA;MyCancerGenome: not present;CancerHotspot: no;3DHotspot: no	MutationAssessor: NA;SIFT: impact: deleterious, score: 0;Polyphen-2: impact: probably_damaging, score: 0.99	MutationAssessor: NA	SIFT: impact: deleterious, score: 0.05	Polyphen-2: impact: benign	0.01	Missense_Mutation	SNP	Diploid
PSMA6	Uterine Corpus Endometrial Carcinoma (TCGA, PanCancer Atlas)	TCGA-AP-A051-01	UCEC	Endometrial Carcinoma	Uterine Endometrioid Carcinoma	S2P		OncoKB: NA;CIViC: NA;MyCancerGenome: not present;CancerHotspot: no;3DHotspot: no	MutationAssessor: NA;SIFT: impact: deleterious, score: 0;Polyphen-2: impact: probably_damaging, score: 0.939	MutationAssessor: NA	SIFT: impact: deleterious, score: 0	Polyphen-2: impact: probably_damaging	1	Missense_Mutation	SNP	Diploid
PSMA6	Uterine Corpus Endometrial Carcinoma (TCGA, PanCancer Atlas)	TCGA-A5-A0G2-01	UCEC	Endometrial Carcinoma	Uterine Serous Carcinoma/Uterine Papillary Serous Carcinoma	A168V		OncoKB: NA;CIViC: NA;MyCancerGenome: not present;CancerHotspot: no;3DHotspot: no	MutationAssessor: NA;SIFT: impact: tolerated, score: 0.4;Polyphen-2: impact: benign, score: 0.006	MutationAssessor: NA	SIFT: impact: deleterious, score: 0	Polyphen-2: impact: probably_damaging	1	Missense_Mutation	SNP	Diploid
PSMA6	Uterine Corpus Endometrial Carcinoma (TCGA, PanCancer Atlas)	TCGA-AP-A1DQ-01	UCEC	Endometrial Carcinoma	Uterine Serous Carcinoma/Uterine Papillary Serous Carcinoma	G169*		OncoKB: NA;CIViC: NA;MyCancerGenome: not present;CancerHotspot: no;3DHotspot: no	MutationAssessor: NA;SIFT: NA;Polyphen-2: NA	MutationAssessor: NA	SIFT: impact: deleterious, score: 0.05	Polyphen-2: impact: benign	0.14	Nonsense_Mutation	SNP	Diploid
PSMA6	Uterine Corpus Endometrial Carcinoma (TCGA, PanCancer Atlas)	TCGA-EO-A22S-01	UCEC	Endometrial Carcinoma	Uterine Endometrioid Carcinoma	X228_splice		OncoKB: NA;CIViC: NA;MyCancerGenome: not present;CancerHotspot: no;3DHotspot: no	MutationAssessor: NA;SIFT: NA;Polyphen-2: NA	MutationAssessor: NA	SIFT: impact: deleterious, score: 0	Polyphen-2: impact: probably_damaging	score: 0.955	Splice_Site	SNP	Diploid
PSMA6	Uterine Corpus Endometrial Carcinoma (TCGA, PanCancer Atlas)	TCGA-FI-A2D5-01	UCEC	Endometrial Carcinoma	Uterine Endometrioid Carcinoma	L134I		OncoKB: NA;CIViC: NA;MyCancerGenome: not present;CancerHotspot: no;3DHotspot: no	MutationAssessor: NA;SIFT: impact: deleterious, score: 0.01;Polyphen-2: impact: possibly_damaging, score: 0.908	MutationAssessor: NA	SIFT: impact: tolerated, score: 0.05	Polyphen-2: impact: benign	0.03	Missense_Mutation	SNP	Diploid
PSMA6	Lung Adenocarcinoma (TCGA, PanCancer Atlas)	TCGA-50-6590-01	LUAD	Non-Small Cell Lung Cancer	Lung Adenocarcinoma	E74Q		OncoKB: NA;CIViC: NA;MyCancerGenome: not present;CancerHotspot: no;3DHotspot: no	MutationAssessor: NA;SIFT: impact: tolerated, score: 0.11;Polyphen-2: impact: benign, score: 0.014	MutationAssessor: NA	SIFT: impact: deleterious, score: 0	Polyphen-2: impact: possibly_damaging	0.89	Missense_Mutation	SNP	Gain
PSMA6	Lung Adenocarcinoma (TCGA, PanCancer Atlas)	TCGA-50-6590-01	LUAD	Non-Small Cell Lung Cancer	Lung Adenocarcinoma	G82A		OncoKB: NA;CIViC: NA;MyCancerGenome: not present;CancerHotspot: no;3DHotspot: no	MutationAssessor: NA;SIFT: impact: deleterious, score: 0;Polyphen-2: impact: probably_damaging, score: 0.974	MutationAssessor: NA	SIFT: impact: tolerated, score: 0.15	Polyphen-2: impact: benign	0.12	Missense_Mutation	SNP	Gain
PSMA6	Lung Adenocarcinoma (TCGA, PanCancer Atlas)	TCGA-55-7907-01	LUAD	Non-Small Cell Lung Cancer	Lung Adenocarcinoma	E108Q		OncoKB: NA;CIViC: NA;MyCancerGenome: not present;CancerHotspot: no;3DHotspot: no	MutationAssessor: NA;SIFT: impact: deleterious, score: 0.04;Polyphen-2: impact: benign, score: 0.038	MutationAssessor: NA	SIFT: impact: deleterious, score: 0.02	Polyphen-2: impact: benign	0.05	Missense_Mutation	SNP	Gain
PSMA6	Lung Adenocarcinoma (TCGA, PanCancer Atlas)	TCGA-91-6829-01	LUAD	Non-Small Cell Lung Cancer	Lung Adenocarcinoma	G36S		OncoKB: NA;CIViC: NA;MyCancerGenome: not present;CancerHotspot: no;3DHotspot: no	MutationAssessor: NA;SIFT: impact: deleterious, score: 0.04;Polyphen-2: impact: possibly_damaging, score: 0.518	MutationAssessor: NA	SIFT: impact: deleterious, score: 0.03	Polyphen-2: impact: benign	0.27	Missense_Mutation	SNP	Gain
PSMA6	Esophageal Adenocarcinoma (TCGA, PanCancer Atlas)	TCGA-VR-A8EW-01	ESCA	Esophageal Squamous Cell Carcinoma	Esophageal Squamous Cell Carcinoma	E216K		OncoKB: NA;CIViC: NA;MyCancerGenome: not present;CancerHotspot: no;3DHotspot: no	MutationAssessor: NA;SIFT: impact: deleterious, score: 0;Polyphen-2: impact: probably_damaging, score: 0.998	MutationAssessor: NA	SIFT: impact: tolerated, score: 0.57	Polyphen-2: impact: benign	0.03	Missense_Mutation	SNP	Gain
PSMA6	Skin Cutaneous Melanoma (TCGA, PanCancer Atlas)	TCGA-EE-A2M8-06	SKCM	Melanoma	Cutaneous Melanoma	P110L		OncoKB: NA;CIViC: NA;MyCancerGenome: not present;CancerHotspot: no;3DHotspot: no	MutationAssessor: NA;SIFT: impact: deleterious, score: 0;Polyphen-2: impact: possibly_damaging, score: 0.849	MutationAssessor: NA	SIFT: impact: deleterious, score: 0	Polyphen-2: impact: probably_damaging	1	Missense_Mutation	SNP	ShallowDel
PSMA6	Skin Cutaneous Melanoma (TCGA, PanCancer Atlas)	TCGA-EE-A2M8-06	SKCM	Melanoma	Cutaneous Melanoma	P110S		OncoKB: NA;CIViC: NA;MyCancerGenome: not present;CancerHotspot: no;3DHotspot: no	MutationAssessor: NA;SIFT: impact: deleterious, score: 0.05;Polyphen-2: impact: possibly_damaging, score: 0.594	MutationAssessor: NA	SIFT: impact: deleterious, score: 0.02	Polyphen-2: impact: probably_damaging	0.94	Missense_Mutation	SNP	ShallowDel
PSMA6	Skin Cutaneous Melanoma (TCGA, PanCancer Atlas)	TCGA-EE-A2GI-06	SKCM	Melanoma	Cutaneous Melanoma	S63F		OncoKB: NA;CIViC: NA;MyCancerGenome: not present;CancerHotspot: no;3DHotspot: no	MutationAssessor: NA;SIFT: impact: deleterious, score: 0;Polyphen-2: impact: benign, score: 0.194	MutationAssessor: NA	SIFT: NA	Polyphen-2: NA		Missense_Mutation	SNP	Diploid
PSMA6	Skin Cutaneous Melanoma (TCGA, PanCancer Atlas)	TCGA-EB-A5KH-06	SKCM	Melanoma	Cutaneous Melanoma	A28G		OncoKB: NA;CIViC: NA;MyCancerGenome: not present;CancerHotspot: no;3DHotspot: no	MutationAssessor: NA;SIFT: impact: deleterious, score: 0;Polyphen-2: impact: probably_damaging, score: 0.954	MutationAssessor: NA	SIFT: impact: deleterious, score: 0.03	Polyphen-2: impact: benign	0.23	Missense_Mutation	SNP	Diploid
PSMA6	Skin Cutaneous Melanoma (TCGA, PanCancer Atlas)	TCGA-EE-A2GC-06	SKCM	Melanoma	Cutaneous Melanoma	A241V		OncoKB: NA;CIViC: NA;MyCancerGenome: not present;CancerHotspot: no;3DHotspot: no	MutationAssessor: NA;SIFT: impact: deleterious, score: 0.05;Polyphen-2: impact: benign, score: 0.006	MutationAssessor: NA	SIFT: impact: deleterious, score: 0	Polyphen-2: impact: possibly_damaging	0.81	Missense_Mutation	SNP	Diploid
PSMA6	Skin Cutaneous Melanoma (TCGA, PanCancer Atlas)	TCGA-EE-A2A5-06	SKCM	Melanoma	Cutaneous Melanoma	G44W		OncoKB: NA;CIViC: NA;MyCancerGenome: not present;CancerHotspot: no;3DHotspot: no	MutationAssessor: NA;SIFT: impact: deleterious, score: 0;Polyphen-2: impact: probably_damaging, score: 1	MutationAssessor: NA	SIFT: NA	Polyphen-2: NA		Missense_Mutation	SNP	ShallowDel
PSMA6	Skin Cutaneous Melanoma (TCGA, PanCancer Atlas)	TCGA-ER-A19B-06	SKCM	Melanoma	Cutaneous Melanoma	G44W		OncoKB: NA;CIViC: NA;MyCancerGenome: not present;CancerHotspot: no;3DHotspot: no	MutationAssessor: NA;SIFT: impact: deleterious, score: 0;Polyphen-2: impact: probably_damaging, score: 1	MutationAssessor: NA	SIFT: NA	Polyphen-2: NA		Missense_Mutation	SNP	ShallowDel
PSMA6	Skin Cutaneous Melanoma (TCGA, PanCancer Atlas)	TCGA-D3-A8GB-06	SKCM	Melanoma	Cutaneous Melanoma	E196K		OncoKB: NA;CIViC: NA;MyCancerGenome: not present;CancerHotspot: no;3DHotspot: no	MutationAssessor: NA;SIFT: impact: deleterious, score: 0.05;Polyphen-2: impact: benign, score: 0.137	MutationAssessor: NA	SIFT: NA	Polyphen-2: NA		Missense_Mutation	SNP	Diploid
PSMA6	Skin Cutaneous Melanoma (TCGA, PanCancer Atlas)	TCGA-D9-A1X3-06	SKCM	Melanoma	Cutaneous Melanoma	P57H		OncoKB: NA;CIViC: NA;MyCancerGenome: not present;CancerHotspot: no;3DHotspot: no	MutationAssessor: NA;SIFT: impact: deleterious, score: 0;Polyphen-2: impact: probably_damaging, score: 0.955	MutationAssessor: NA	SIFT: NA	Polyphen-2: NA		Missense_Mutation	SNP	Diploid
PSMA6	Skin Cutaneous Melanoma (TCGA, PanCancer Atlas)	TCGA-GN-A8LK-06	SKCM	Melanoma	Cutaneous Melanoma	K102N		OncoKB: NA;CIViC: NA;MyCancerGenome: not present;CancerHotspot: no;3DHotspot: no	MutationAssessor: NA;SIFT: impact: tolerated, score: 0.05;Polyphen-2: impact: benign, score: 0.027	MutationAssessor: NA	SIFT: NA	Polyphen-2: NA		Missense_Mutation	SNP	Gain
PSMA6	Stomach Adenocarcinoma (TCGA, PanCancer Atlas)	TCGA-MX-A5UJ-01	STAD	Esophagogastric Adenocarcinoma	Tubular Stomach Adenocarcinoma	R95H		OncoKB: NA;CIViC: NA;MyCancerGenome: not present;CancerHotspot: no;3DHotspot: no	MutationAssessor: NA;SIFT: impact: deleterious, score: 0;Polyphen-2: impact: possibly_damaging, score: 0.89	MutationAssessor: NA	SIFT: NA	Polyphen-2: NA		Missense_Mutation	SNP	Diploid
PSMA6	Stomach Adenocarcinoma (TCGA, PanCancer Atlas)	TCGA-BR-8078-01	STAD	Esophagogastric Adenocarcinoma	Stomach Adenocarcinoma	Q150R		OncoKB: NA;CIViC: NA;MyCancerGenome: not present;CancerHotspot: no;3DHotspot: no	MutationAssessor: NA;SIFT: impact: tolerated, score: 0.15;Polyphen-2: impact: benign, score: 0.119	MutationAssessor: NA	SIFT: NA	Polyphen-2: NA		Missense_Mutation	SNP	Diploid
PSMA6	Stomach Adenocarcinoma (TCGA, PanCancer Atlas)	TCGA-CD-8529-01	STAD	Esophagogastric Adenocarcinoma	Mucinous Stomach Adenocarcinoma	D188H		OncoKB: NA;CIViC: NA;MyCancerGenome: not present;CancerHotspot: no;3DHotspot: no	MutationAssessor: NA;SIFT: impact: deleterious, score: 0.02;Polyphen-2: impact: benign, score: 0.05	MutationAssessor: NA	SIFT: NA	Polyphen-2: NA		Missense_Mutation	SNP	Diploid
PSMA6	Stomach Adenocarcinoma (TCGA, PanCancer Atlas)	TCGA-EQ-A4SO-01	STAD	Esophagogastric Adenocarcinoma	Stomach Adenocarcinoma	T73N		OncoKB: NA;CIViC: NA;MyCancerGenome: not present;CancerHotspot: no;3DHotspot: no	MutationAssessor: NA;SIFT: impact: deleterious, score: 0.03;Polyphen-2: impact: benign, score: 0.271	MutationAssessor: NA	SIFT: NA	Polyphen-2: NA		Missense_Mutation	SNP	Diploid
PSMA6	Stomach Adenocarcinoma (TCGA, PanCancer Atlas)	TCGA-VQ-A8P2-01	STAD	Esophagogastric Adenocarcinoma	Mucinous Stomach Adenocarcinoma	L37I		OncoKB: NA;CIViC: NA;MyCancerGenome: not present;CancerHotspot: no;3DHotspot: no	MutationAssessor: NA;SIFT: impact: tolerated, score: 0.57;Polyphen-2: impact: benign, score: 0.029	MutationAssessor: NA	SIFT: NA	Polyphen-2: NA		Missense_Mutation	SNP	Diploid
PSMA6	Breast Invasive Carcinoma (TCGA, PanCancer Atlas)	TCGA-D8-A27G-01	BRCA	Invasive Breast Carcinoma	Breast Invasive Lobular Carcinoma	G169E		OncoKB: NA;CIViC: NA;MyCancerGenome: not present;CancerHotspot: no;3DHotspot: no	MutationAssessor: NA;SIFT: impact: deleterious, score: 0;Polyphen-2: impact: probably_damaging, score: 1	MutationAssessor: NA	SIFT: NA	Polyphen-2: NA		Missense_Mutation	SNP	Diploid
PSMA6	Colorectal Adenocarcinoma (TCGA, PanCancer Atlas)	TCGA-AD-6964-01	COAD	Colorectal Adenocarcinoma	Colon Adenocarcinoma	A129V		OncoKB: NA;CIViC: NA;MyCancerGenome: not present;CancerHotspot: no;3DHotspot: no	MutationAssessor: NA;SIFT: impact: deleterious, score: 0.02;Polyphen-2: impact: probably_damaging, score: 0.938	MutationAssessor: NA	SIFT: NA	Polyphen-2: NA		Missense_Mutation	SNP	Diploid
PSMA6	Kidney Renal Papillary Cell Carcinoma (TCGA, PanCancer Atlas)	TCGA-SX-A7SP-01	KIRP	Renal Non-Clear Cell Carcinoma	Papillary Renal Cell Carcinoma	L206Qfs*9		OncoKB: NA;CIViC: NA;MyCancerGenome: not present;CancerHotspot: no;3DHotspot: no	MutationAssessor: NA;SIFT: NA;Polyphen-2: NA	MutationAssessor: NA	SIFT: NA	Polyphen-2: NA		Frame_Shift_Del	DEL	Diploid
PSMA6	Head and Neck Squamous Cell Carcinoma (TCGA, PanCancer Atlas)	TCGA-BA-A6DL-01	HNSC	Head and Neck Squamous Cell Carcinoma	Head and Neck Squamous Cell Carcinoma	R3H		OncoKB: NA;CIViC: NA;MyCancerGenome: not present;CancerHotspot: no;3DHotspot: no	MutationAssessor: NA;SIFT: impact: deleterious, score: 0.03;Polyphen-2: impact: benign, score: 0.226	MutationAssessor: NA	SIFT: NA	Polyphen-2: NA		Missense_Mutation	SNP	Gain
PSMA6	Head and Neck Squamous Cell Carcinoma (TCGA, PanCancer Atlas)	TCGA-CR-6487-01	HNSC	Head and Neck Squamous Cell Carcinoma	Head and Neck Squamous Cell Carcinoma	D236H		OncoKB: NA;CIViC: NA;MyCancerGenome: not present;CancerHotspot: no;3DHotspot: no	MutationAssessor: NA;SIFT: impact: deleterious, score: 0;Polyphen-2: impact: possibly_damaging, score: 0.81	MutationAssessor: NA	SIFT: NA	Polyphen-2: NA		Missense_Mutation	SNP	Diploid
PSMA6	Cervical Squamous Cell Carcinoma (TCGA, PanCancer Atlas)	TCGA-EA-A410-01	CESC	Cervical Squamous Cell Carcinoma	Cervical Squamous Cell Carcinoma	V183*		OncoKB: NA;CIViC: NA;MyCancerGenome: not present;CancerHotspot: no;3DHotspot: no	MutationAssessor: NA;SIFT: NA;Polyphen-2: NA	MutationAssessor: NA	SIFT: NA	Polyphen-2: NA		Frame_Shift_Del	DEL	Diploid
PSMA6	Cervical Squamous Cell Carcinoma (TCGA, PanCancer Atlas)	TCGA-EA-A3HS-01	CESC	Cervical Squamous Cell Carcinoma	Cervical Squamous Cell Carcinoma	Q147*		OncoKB: NA;CIViC: NA;MyCancerGenome: not present;CancerHotspot: no;3DHotspot: no	MutationAssessor: NA;SIFT: NA;Polyphen-2: NA	MutationAssessor: NA	SIFT: NA	Polyphen-2: NA		Nonsense_Mutation	SNP	Diploid
PSMA7	Breast Invasive Carcinoma (TCGA, PanCancer Atlas)	TCGA-UL-AAZ6-01	BRCA	Invasive Breast Carcinoma	Breast Invasive Ductal Carcinoma	ZNF701-PSMA7	rs = -0.35, q-value = 3.25e-29	OncoKB: Unknown, level NA, resistance NA;CIViC: NA;MyCancerGenome: not present;CancerHotspot: no;3DHotspot: no	MutationAssessor: NA;SIFT: NA;Polyphen-2: NA	MutationAssessor: NA	SIFT: NA	Polyphen-2: NA		fusion	FUSION	Amp
PSMA7	Uterine Carcinosarcoma (TCGA, PanCancer Atlas)	TCGA-ND-A4WC-01	UCS	Endometrial Carcinoma	Uterine Carcinosarcoma/Uterine Malignant Mixed Mullerian Tumor	E179K		OncoKB: NA;CIViC: NA;MyCancerGenome: not present;CancerHotspot: no;3DHotspot: no	MutationAssessor: NA;SIFT: NA;Polyphen-2: NA	MutationAssessor: NA	SIFT: NA	Polyphen-2: NA		Missense_Mutation	SNP	Diploid
PSMA7	Ovarian Serous Cystadenocarcinoma (TCGA, PanCancer Atlas)	TCGA-24-1436-01	OV	Ovarian Epithelial Tumor	Serous Ovarian Cancer	C91Y		OncoKB: NA;CIViC: NA;MyCancerGenome: not present;CancerHotspot: no;3DHotspot: no	MutationAssessor: NA;SIFT: NA;Polyphen-2: NA	MutationAssessor: NA	SIFT: NA	Polyphen-2: NA		Missense_Mutation	SNP	Gain
PSMA7	Glioblastoma Multiforme (TCGA, PanCancer Atlas)	TCGA-12-0820-01	GBM	Glioblastoma	Glioblastoma Multiforme	Q215Nfs*6		OncoKB: NA;CIViC: NA;MyCancerGenome: not present;CancerHotspot: no;3DHotspot: no	MutationAssessor: NA;SIFT: NA;Polyphen-2: NA	MutationAssessor: NA	SIFT: NA	Polyphen-2: NA		Frame_Shift_Del	DEL	Gain
PSMA7	Bladder Urothelial Carcinoma (TCGA, PanCancer Atlas)	TCGA-CF-A8HX-01	BLCA	Bladder Urothelial Carcinoma	Bladder Urothelial Carcinoma	S201L		OncoKB: NA;CIViC: NA;MyCancerGenome: not present;CancerHotspot: no;3DHotspot: no	MutationAssessor: NA;SIFT: NA;Polyphen-2: NA	MutationAssessor: NA	SIFT: NA	Polyphen-2: NA		Missense_Mutation	SNP	Gain
PSMA7	Liver Hepatocellular Carcinoma (TCGA, PanCancer Atlas)	TCGA-ED-A7PZ-01	LIHC	Hepatocellular Carcinoma	Hepatocellular Carcinoma	Y176C		OncoKB: NA;CIViC: NA;MyCancerGenome: not present;CancerHotspot: no;3DHotspot: no	MutationAssessor: NA;SIFT: NA;Polyphen-2: NA	MutationAssessor: NA	SIFT: NA	Polyphen-2: NA		Missense_Mutation	SNP	Diploid
PSMA7	Liver Hepatocellular Carcinoma (TCGA, PanCancer Atlas)	TCGA-CC-A7IH-01	LIHC	Hepatocellular Carcinoma	Hepatocellular Carcinoma	V26L		OncoKB: NA;CIViC: NA;MyCancerGenome: not present;CancerHotspot: no;3DHotspot: no	MutationAssessor: NA;SIFT: NA;Polyphen-2: NA	MutationAssessor: NA	SIFT: NA	Polyphen-2: NA		Missense_Mutation	SNP	Diploid
PSMA7	Liver Hepatocellular Carcinoma (TCGA, PanCancer Atlas)	TCGA-CC-A7IH-01	LIHC	Hepatocellular Carcinoma	Hepatocellular Carcinoma	A22S		OncoKB: NA;CIViC: NA;MyCancerGenome: not present;CancerHotspot: no;3DHotspot: no	MutationAssessor: NA;SIFT: NA;Polyphen-2: NA	MutationAssessor: NA	SIFT: NA	Polyphen-2: NA		Missense_Mutation	SNP	Diploid
PSMA7	Pheochromocytoma and Paraganglioma (TCGA, PanCancer Atlas)	TCGA-QT-A5XK-01	PCPG	Pheochromocytoma	Pheochromocytoma	Q54*		OncoKB: NA;CIViC: NA;MyCancerGenome: not present;CancerHotspot: no;3DHotspot: no	MutationAssessor: NA;SIFT: NA;Polyphen-2: NA	MutationAssessor: NA	SIFT: NA	Polyphen-2: NA		Nonsense_Mutation	SNP	Diploid
PSMA7	Uterine Corpus Endometrial Carcinoma (TCGA, PanCancer Atlas)	TCGA-B5-A11E-01	UCEC	Endometrial Carcinoma	Uterine Endometrioid Carcinoma	E179K		OncoKB: NA;CIViC: NA;MyCancerGenome: not present;CancerHotspot: no;3DHotspot: no	MutationAssessor: NA;SIFT: NA;Polyphen-2: NA	MutationAssessor: NA	SIFT: NA	Polyphen-2: NA		Missense_Mutation	SNP	Diploid
PSMA7	Uterine Corpus Endometrial Carcinoma (TCGA, PanCancer Atlas)	TCGA-A5-A2K7-01	UCEC	Endometrial Carcinoma	Uterine Endometrioid Carcinoma	S201L		OncoKB: NA;CIViC: NA;MyCancerGenome: not present;CancerHotspot: no;3DHotspot: no	MutationAssessor: NA;SIFT: NA;Polyphen-2: NA	MutationAssessor: NA	SIFT: NA	Polyphen-2: NA		Missense_Mutation	SNP	Diploid
PSMA7	Uterine Corpus Endometrial Carcinoma (TCGA, PanCancer Atlas)	TCGA-AP-A054-01	UCEC	Endometrial Carcinoma	Uterine Endometrioid Carcinoma	Y145C		OncoKB: NA;CIViC: NA;MyCancerGenome: not present;CancerHotspot: no;3DHotspot: no	MutationAssessor: NA;SIFT: NA;Polyphen-2: NA	MutationAssessor: NA	SIFT: NA	Polyphen-2: NA		Missense_Mutation	SNP	Diploid
PSMA7	Uterine Corpus Endometrial Carcinoma (TCGA, PanCancer Atlas)	TCGA-AX-A05Z-01	UCEC	Endometrial Carcinoma	Uterine Endometrioid Carcinoma	X219_splice		OncoKB: NA;CIViC: NA;MyCancerGenome: not present;CancerHotspot: no;3DHotspot: no	MutationAssessor: NA;SIFT: NA;Polyphen-2: NA	MutationAssessor: NA	SIFT: NA	Polyphen-2: NA		Splice_Site	SNP	Diploid
PSMA7	Uterine Corpus Endometrial Carcinoma (TCGA, PanCancer Atlas)	TCGA-AX-A2HC-01	UCEC	Endometrial Carcinoma	Uterine Endometrioid Carcinoma	D137N		OncoKB: NA;CIViC: NA;MyCancerGenome: not present;CancerHotspot: no;3DHotspot: no	MutationAssessor: NA;SIFT: NA;Polyphen-2: NA	MutationAssessor: NA	SIFT: NA	Polyphen-2: NA		Missense_Mutation	SNP	Diploid
PSMA7	Uterine Corpus Endometrial Carcinoma (TCGA, PanCancer Atlas)	TCGA-EY-A1GI-01	UCEC	Endometrial Carcinoma	Uterine Endometrioid Carcinoma	D137N		OncoKB: NA;CIViC: NA;MyCancerGenome: not present;CancerHotspot: no;3DHotspot: no	MutationAssessor: NA;SIFT: NA;Polyphen-2: NA	MutationAssessor: NA	SIFT: NA	Polyphen-2: NA		Missense_Mutation	SNP	Diploid
PSMA7	Uterine Corpus Endometrial Carcinoma (TCGA, PanCancer Atlas)	TCGA-B5-A3FC-01	UCEC	Endometrial Carcinoma	Uterine Endometrioid Carcinoma	R213*		OncoKB: NA;CIViC: NA;MyCancerGenome: not present;CancerHotspot: no;3DHotspot: no	MutationAssessor: NA;SIFT: NA;Polyphen-2: NA	MutationAssessor: NA	SIFT: NA	Polyphen-2: NA		Nonsense_Mutation	SNP	Diploid
PSMA7	Uterine Corpus Endometrial Carcinoma (TCGA, PanCancer Atlas)	TCGA-EO-A22U-01	UCEC	Endometrial Carcinoma	Uterine Endometrioid Carcinoma	A112T		OncoKB: NA;CIViC: NA;MyCancerGenome: not present;CancerHotspot: no;3DHotspot: no	MutationAssessor: NA;SIFT: NA;Polyphen-2: NA	MutationAssessor: NA	SIFT: NA	Polyphen-2: NA		Missense_Mutation	SNP	Diploid
PSMA7	Uterine Corpus Endometrial Carcinoma (TCGA, PanCancer Atlas)	TCGA-AJ-A3EL-01	UCEC	Endometrial Carcinoma	Uterine Endometrioid Carcinoma	E240K		OncoKB: NA;CIViC: NA;MyCancerGenome: not present;CancerHotspot: no;3DHotspot: no	MutationAssessor: NA;SIFT: NA;Polyphen-2: NA	MutationAssessor: NA	SIFT: NA	Polyphen-2: NA		Missense_Mutation	SNP	Diploid
PSMA7	Uterine Corpus Endometrial Carcinoma (TCGA, PanCancer Atlas)	TCGA-AX-A1CE-01	UCEC	Endometrial Carcinoma	Uterine Endometrioid Carcinoma	R117H		OncoKB: NA;CIViC: NA;MyCancerGenome: not present;CancerHotspot: no;3DHotspot: no	MutationAssessor: NA;SIFT: NA;Polyphen-2: NA	MutationAssessor: NA	SIFT: NA	Polyphen-2: NA		Missense_Mutation	SNP	Diploid
PSMA7	Uterine Corpus Endometrial Carcinoma (TCGA, PanCancer Atlas)	TCGA-AX-A2HC-01	UCEC	Endometrial Carcinoma	Uterine Endometrioid Carcinoma	A230T		OncoKB: NA;CIViC: NA;MyCancerGenome: not present;CancerHotspot: no;3DHotspot: no	MutationAssessor: NA;SIFT: NA;Polyphen-2: NA	MutationAssessor: NA	SIFT: NA	Polyphen-2: NA		Missense_Mutation	SNP	Diploid
PSMA7	Uterine Corpus Endometrial Carcinoma (TCGA, PanCancer Atlas)	TCGA-B5-A3FA-01	UCEC	Endometrial Carcinoma	Uterine Endometrioid Carcinoma	K166E		OncoKB: NA;CIViC: NA;MyCancerGenome: not present;CancerHotspot: no;3DHotspot: no	MutationAssessor: NA;SIFT: NA;Polyphen-2: NA	MutationAssessor: NA	SIFT: NA	Polyphen-2: NA		Missense_Mutation	SNP	Diploid
PSMA7	Uterine Corpus Endometrial Carcinoma (TCGA, PanCancer Atlas)	TCGA-D1-A1NZ-01	UCEC	Endometrial Carcinoma	Uterine Endometrioid Carcinoma	P126Rfs*36		OncoKB: NA;CIViC: NA;MyCancerGenome: not present;CancerHotspot: no;3DHotspot: no	MutationAssessor: NA;SIFT: NA;Polyphen-2: NA	MutationAssessor: NA	SIFT: NA	Polyphen-2: NA		Frame_Shift_Del	DEL	Diploid
PSMA7	Uterine Corpus Endometrial Carcinoma (TCGA, PanCancer Atlas)	TCGA-EO-A22X-01	UCEC	Endometrial Carcinoma	Uterine Endometrioid Carcinoma	T141I		OncoKB: NA;CIViC: NA;MyCancerGenome: not present;CancerHotspot: no;3DHotspot: no	MutationAssessor: NA;SIFT: NA;Polyphen-2: NA	MutationAssessor: NA	SIFT: NA	Polyphen-2: NA		Missense_Mutation	SNP	Diploid
PSMA7	Uterine Corpus Endometrial Carcinoma (TCGA, PanCancer Atlas)	TCGA-EY-A1GU-01	UCEC	Endometrial Carcinoma	Uterine Endometrioid Carcinoma	G44D		OncoKB: NA;CIViC: NA;MyCancerGenome: not present;CancerHotspot: no;3DHotspot: no	MutationAssessor: NA;SIFT: NA;Polyphen-2: NA	MutationAssessor: NA	SIFT: NA	Polyphen-2: NA		Missense_Mutation	SNP	Diploid
PSMA7	Uterine Corpus Endometrial Carcinoma (TCGA, PanCancer Atlas)	TCGA-QF-A5YS-01	UCEC	Endometrial Carcinoma	Uterine Mixed Endometrial Carcinoma	R36*		OncoKB: NA;CIViC: NA;MyCancerGenome: not present;CancerHotspot: no;3DHotspot: no	MutationAssessor: NA;SIFT: NA;Polyphen-2: NA	MutationAssessor: NA	SIFT: NA	Polyphen-2: NA		Nonsense_Mutation	SNP	Diploid
PSMA7	Lung Adenocarcinoma (TCGA, PanCancer Atlas)	TCGA-38-4625-01	LUAD	Non-Small Cell Lung Cancer	Lung Adenocarcinoma	D185Y		OncoKB: NA;CIViC: NA;MyCancerGenome: not present;CancerHotspot: no;3DHotspot: no	MutationAssessor: NA;SIFT: NA;Polyphen-2: NA	MutationAssessor: NA	SIFT: NA	Polyphen-2: NA		Missense_Mutation	SNP	Gain
PSMA7	Lung Adenocarcinoma (TCGA, PanCancer Atlas)	TCGA-55-8301-01	LUAD	Non-Small Cell Lung Cancer	Lung Adenocarcinoma	K48del		OncoKB: NA;CIViC: NA;MyCancerGenome: not present;CancerHotspot: no;3DHotspot: no	MutationAssessor: NA;SIFT: NA;Polyphen-2: NA	MutationAssessor: NA	SIFT: NA	Polyphen-2: NA		In_Frame_Del	DEL	Diploid
PSMA7	Lung Adenocarcinoma (TCGA, PanCancer Atlas)	TCGA-55-8203-01	LUAD	Non-Small Cell Lung Cancer	Lung Adenocarcinoma	X116_splice		OncoKB: NA;CIViC: NA;MyCancerGenome: not present;CancerHotspot: no;3DHotspot: no	MutationAssessor: NA;SIFT: NA;Polyphen-2: NA	MutationAssessor: NA	SIFT: NA	Polyphen-2: NA		Splice_Site	SNP	Diploid
PSMA7	Lung Adenocarcinoma (TCGA, PanCancer Atlas)	TCGA-55-8616-01	LUAD	Non-Small Cell Lung Cancer	Lung Adenocarcinoma	R60W		OncoKB: NA;CIViC: NA;MyCancerGenome: not present;CancerHotspot: no;3DHotspot: no	MutationAssessor: NA;SIFT: NA;Polyphen-2: NA	MutationAssessor: NA	SIFT: NA	Polyphen-2: NA		Missense_Mutation	SNP	Diploid
PSMA7	Lung Adenocarcinoma (TCGA, PanCancer Atlas)	TCGA-78-8660-01	LUAD	Non-Small Cell Lung Cancer	Lung Adenocarcinoma	S130F		OncoKB: NA;CIViC: NA;MyCancerGenome: not present;CancerHotspot: no;3DHotspot: no	MutationAssessor: NA;SIFT: NA;Polyphen-2: NA	MutationAssessor: NA	SIFT: NA	Polyphen-2: NA		Missense_Mutation	SNP	Gain
PSMA7	Lung Adenocarcinoma (TCGA, PanCancer Atlas)	TCGA-55-8094-01	LUAD	Non-Small Cell Lung Cancer	Lung Adenocarcinoma	X116_splice		OncoKB: NA;CIViC: NA;MyCancerGenome: not present;CancerHotspot: no;3DHotspot: no	MutationAssessor: NA;SIFT: NA;Polyphen-2: NA	MutationAssessor: NA	SIFT: impact: tolerated, score: 0.61	Polyphen-2: impact: possibly_damaging	score: 0.788	Splice_Region	SNP	ShallowDel
PSMA7	Esophageal Adenocarcinoma (TCGA, PanCancer Atlas)	TCGA-IC-A6RE-01	ESCA	Esophagogastric Adenocarcinoma	Esophageal Adenocarcinoma	N221S		OncoKB: NA;CIViC: NA;MyCancerGenome: not present;CancerHotspot: no;3DHotspot: no	MutationAssessor: NA;SIFT: NA;Polyphen-2: NA	MutationAssessor: NA	SIFT: impact: deleterious, score: 0.02	Polyphen-2: impact: possibly_damaging	0.55	Missense_Mutation	SNP	Gain
PSMA7	Skin Cutaneous Melanoma (TCGA, PanCancer Atlas)	TCGA-EE-A3J7-06	SKCM	Melanoma	Cutaneous Melanoma	X219_splice		OncoKB: NA;CIViC: NA;MyCancerGenome: not present;CancerHotspot: no;3DHotspot: no	MutationAssessor: NA;SIFT: NA;Polyphen-2: NA	MutationAssessor: NA	SIFT: impact: deleterious, score: 0.02	Polyphen-2: impact: benign	score: 0.242	Splice_Site	SNP	Gain
PSMA7	Skin Cutaneous Melanoma (TCGA, PanCancer Atlas)	TCGA-DA-A1I5-06	SKCM	Melanoma	Cutaneous Melanoma	L196M		OncoKB: NA;CIViC: NA;MyCancerGenome: not present;CancerHotspot: no;3DHotspot: no	MutationAssessor: NA;SIFT: NA;Polyphen-2: NA	MutationAssessor: NA	SIFT: impact: deleterious, score: 0.01	Polyphen-2: impact: probably_damaging	0.98	Missense_Mutation	SNP	Diploid
PSMA7	Stomach Adenocarcinoma (TCGA, PanCancer Atlas)	TCGA-BR-4184-01	STAD	Esophagogastric Adenocarcinoma	Stomach Adenocarcinoma	R124C		OncoKB: NA;CIViC: NA;MyCancerGenome: not present;CancerHotspot: no;3DHotspot: no	MutationAssessor: NA;SIFT: NA;Polyphen-2: NA	MutationAssessor: NA	SIFT: impact: deleterious, score: 0	Polyphen-2: impact: probably_damaging	0.98	Missense_Mutation	SNP	Gain
PSMA7	Stomach Adenocarcinoma (TCGA, PanCancer Atlas)	TCGA-BR-6566-01	STAD	Esophagogastric Adenocarcinoma	Stomach Adenocarcinoma	R124C		OncoKB: NA;CIViC: NA;MyCancerGenome: not present;CancerHotspot: no;3DHotspot: no	MutationAssessor: NA;SIFT: NA;Polyphen-2: NA	MutationAssessor: NA	SIFT: impact: tolerated, score: 0.15	Polyphen-2: impact: benign	0.18	Missense_Mutation	SNP	Diploid
PSMA7	Stomach Adenocarcinoma (TCGA, PanCancer Atlas)	TCGA-VQ-A91D-01	STAD	Esophagogastric Adenocarcinoma	Intestinal Type Stomach Adenocarcinoma	R169C		OncoKB: NA;CIViC: NA;MyCancerGenome: not present;CancerHotspot: no;3DHotspot: no	MutationAssessor: NA;SIFT: NA;Polyphen-2: NA	MutationAssessor: NA	SIFT: impact: tolerated, score: 0.51	Polyphen-2: impact: benign	0.01	Missense_Mutation	SNP	Diploid
PSMA7	Stomach Adenocarcinoma (TCGA, PanCancer Atlas)	TCGA-BR-4201-01	STAD	Esophagogastric Adenocarcinoma	Stomach Adenocarcinoma	R95Q		OncoKB: NA;CIViC: NA;MyCancerGenome: not present;CancerHotspot: no;3DHotspot: no	MutationAssessor: NA;SIFT: NA;Polyphen-2: NA	MutationAssessor: NA	SIFT: NA	Polyphen-2: NA		Missense_Mutation	SNP	Gain
PSMA7	Stomach Adenocarcinoma (TCGA, PanCancer Atlas)	TCGA-CG-5721-01	STAD	Esophagogastric Adenocarcinoma	Intestinal Type Stomach Adenocarcinoma	T119M		OncoKB: NA;CIViC: NA;MyCancerGenome: not present;CancerHotspot: no;3DHotspot: no	MutationAssessor: NA;SIFT: NA;Polyphen-2: NA	MutationAssessor: NA	SIFT: impact: deleterious, score: 0	Polyphen-2: impact: probably_damaging	1	Missense_Mutation	SNP	Diploid
PSMA7	Stomach Adenocarcinoma (TCGA, PanCancer Atlas)	TCGA-FP-8099-01	STAD	Esophagogastric Adenocarcinoma	Stomach Adenocarcinoma	N239Tfs*?		OncoKB: NA;CIViC: NA;MyCancerGenome: not present;CancerHotspot: no;3DHotspot: no	MutationAssessor: NA;SIFT: NA;Polyphen-2: NA	MutationAssessor: NA	SIFT: impact: tolerated_low_confidence, score: 0.18	Polyphen-2: impact: benign	0.03	Frame_Shift_Del	DEL	Gain
PSMA7	Breast Invasive Carcinoma (TCGA, PanCancer Atlas)	TCGA-AC-A5XS-01	BRCA	Invasive Breast Carcinoma	Breast Invasive Lobular Carcinoma	S150W		OncoKB: NA;CIViC: NA;MyCancerGenome: not present;CancerHotspot: no;3DHotspot: no	MutationAssessor: NA;SIFT: NA;Polyphen-2: NA	MutationAssessor: NA	SIFT: impact: tolerated, score: 0.4	Polyphen-2: impact: benign	0.02	Missense_Mutation	SNP	Gain
PSMA7	Colorectal Adenocarcinoma (TCGA, PanCancer Atlas)	TCGA-AG-A002-01	READ	Colorectal Adenocarcinoma	Rectal Adenocarcinoma	D185Y		OncoKB: NA;CIViC: NA;MyCancerGenome: not present;CancerHotspot: no;3DHotspot: no	MutationAssessor: NA;SIFT: NA;Polyphen-2: NA	MutationAssessor: NA	SIFT: impact: deleterious, score: 0.01	Polyphen-2: impact: possibly_damaging	0.71	Missense_Mutation	SNP	Diploid
PSMA7	Colorectal Adenocarcinoma (TCGA, PanCancer Atlas)	TCGA-AZ-4315-01	COAD	Colorectal Adenocarcinoma	Colon Adenocarcinoma	E179K		OncoKB: NA;CIViC: NA;MyCancerGenome: not present;CancerHotspot: no;3DHotspot: no	MutationAssessor: NA;SIFT: NA;Polyphen-2: NA	MutationAssessor: NA	SIFT: NA	Polyphen-2: NA		Missense_Mutation	SNP	Diploid
PSMA7	Colorectal Adenocarcinoma (TCGA, PanCancer Atlas)	TCGA-NH-A8F7-01	COAD	Colorectal Adenocarcinoma	Colon Adenocarcinoma	K48del		OncoKB: NA;CIViC: NA;MyCancerGenome: not present;CancerHotspot: no;3DHotspot: no	MutationAssessor: NA;SIFT: NA;Polyphen-2: NA	MutationAssessor: NA	SIFT: impact: deleterious, score: 0.04	Polyphen-2: impact: benign	0.29	In_Frame_Del	DEL	Gain
PSMA7	Colorectal Adenocarcinoma (TCGA, PanCancer Atlas)	TCGA-AD-6901-01	COAD	Colorectal Adenocarcinoma	Colon Adenocarcinoma	E233*		OncoKB: NA;CIViC: NA;MyCancerGenome: not present;CancerHotspot: no;3DHotspot: no	MutationAssessor: NA;SIFT: NA;Polyphen-2: NA	MutationAssessor: NA	SIFT: NA	Polyphen-2: NA		Nonsense_Mutation	SNP	Gain
PSMA7	Kidney Renal Papillary Cell Carcinoma (TCGA, PanCancer Atlas)	TCGA-BQ-5890-01	KIRP	Renal Non-Clear Cell Carcinoma	Papillary Renal Cell Carcinoma	K115T		OncoKB: NA;CIViC: NA;MyCancerGenome: not present;CancerHotspot: no;3DHotspot: no	MutationAssessor: NA;SIFT: NA;Polyphen-2: NA	MutationAssessor: NA	SIFT: NA	Polyphen-2: NA		Missense_Mutation	SNP	Diploid
PSMA7	Cervical Squamous Cell Carcinoma (TCGA, PanCancer Atlas)	TCGA-VS-A94X-01	CESC	Cervical Squamous Cell Carcinoma	Cervical Squamous Cell Carcinoma	S130F		OncoKB: NA;CIViC: NA;MyCancerGenome: not present;CancerHotspot: no;3DHotspot: no	MutationAssessor: NA;SIFT: NA;Polyphen-2: NA	MutationAssessor: NA	SIFT: NA	Polyphen-2: NA		Missense_Mutation	SNP	Gain
PSMA8	Prostate Adenocarcinoma (TCGA, PanCancer Atlas)	TCGA-G9-6361-01	PRAD	Prostate Adenocarcinoma	Prostate Adenocarcinoma	USP48-PSMA8		OncoKB: Unknown, level NA, resistance NA;CIViC: NA;MyCancerGenome: not present;CancerHotspot: no;3DHotspot: no	MutationAssessor: NA;SIFT: NA;Polyphen-2: NA	MutationAssessor: NA	SIFT: NA	Polyphen-2: NA		fusion	FUSION	Diploid
PSMA8	Breast Invasive Carcinoma (TCGA, PanCancer Atlas)	TCGA-BH-A0H7-01	BRCA	Invasive Breast Carcinoma	Breast Invasive Ductal Carcinoma	LAMA3-PSMA8		OncoKB: Unknown, level NA, resistance NA;CIViC: NA;MyCancerGenome: not present;CancerHotspot: no;3DHotspot: no	MutationAssessor: NA;SIFT: NA;Polyphen-2: NA	MutationAssessor: NA	SIFT: impact: deleterious, score: 0.02	Polyphen-2: impact: possibly_damaging	0.55	fusion	FUSION	ShallowDel
PSMA8	Glioblastoma Multiforme (TCGA, PanCancer Atlas)	TCGA-14-0813-01	GBM	Glioblastoma	Glioblastoma Multiforme	X165_splice		OncoKB: NA;CIViC: NA;MyCancerGenome: not present;CancerHotspot: no;3DHotspot: no	MutationAssessor: NA;SIFT: NA;Polyphen-2: NA	MutationAssessor: NA	SIFT: NA	Polyphen-2: NA		Splice_Site	SNP	Diploid
PSMA8	Glioblastoma Multiforme (TCGA, PanCancer Atlas)	TCGA-19-5956-01	GBM	Glioblastoma	Glioblastoma Multiforme	K253N		OncoKB: NA;CIViC: NA;MyCancerGenome: not present;CancerHotspot: no;3DHotspot: no	MutationAssessor: NA;SIFT: impact: tolerated, score: 0.61;Polyphen-2: impact: possibly_damaging, score: 0.788	MutationAssessor: NA	SIFT: impact: deleterious, score: 0	Polyphen-2: impact: probably_damaging	0.98	Missense_Mutation	SNP	Diploid
PSMA8	Sarcoma (TCGA, PanCancer Atlas)	TCGA-DX-A6B9-01	SARC	Sarcoma	Leiomyosarcoma	R117H		OncoKB: NA;CIViC: NA;MyCancerGenome: not present;CancerHotspot: no;3DHotspot: no	MutationAssessor: NA;SIFT: impact: deleterious, score: 0.02;Polyphen-2: impact: possibly_damaging, score: 0.554	MutationAssessor: NA	SIFT: impact: tolerated, score: 0.52	Polyphen-2: impact: benign	0.01	Missense_Mutation	SNP	Diploid
PSMA8	Lung Squamous Cell Carcinoma (TCGA, PanCancer Atlas)	TCGA-22-1012-01	LUSC	Non-Small Cell Lung Cancer	Lung Squamous Cell Carcinoma	T85A		OncoKB: NA;CIViC: NA;MyCancerGenome: not present;CancerHotspot: no;3DHotspot: no	MutationAssessor: NA;SIFT: impact: deleterious, score: 0.02;Polyphen-2: impact: benign, score: 0.242	MutationAssessor: NA	SIFT: impact: deleterious, score: 0	Polyphen-2: impact: probably_damaging	1	Missense_Mutation	SNP	Gain
PSMA8	Lung Squamous Cell Carcinoma (TCGA, PanCancer Atlas)	TCGA-43-2581-01	LUSC	Non-Small Cell Lung Cancer	Lung Squamous Cell Carcinoma	A34=		OncoKB: NA;CIViC: NA;MyCancerGenome: not present;CancerHotspot: no;3DHotspot: no	MutationAssessor: NA;SIFT: NA;Polyphen-2: NA	MutationAssessor: NA	SIFT: impact: deleterious, score: 0.02	Polyphen-2: impact: benign	score: 0.026	Splice_Region	SNP	Diploid
PSMA8	Lung Squamous Cell Carcinoma (TCGA, PanCancer Atlas)	TCGA-56-7823-01	LUSC	Non-Small Cell Lung Cancer	Lung Squamous Cell Carcinoma	R38P		OncoKB: NA;CIViC: NA;MyCancerGenome: not present;CancerHotspot: no;3DHotspot: no	MutationAssessor: NA;SIFT: impact: deleterious, score: 0.01;Polyphen-2: impact: probably_damaging, score: 0.982	MutationAssessor: NA	SIFT: NA	Polyphen-2: NA		Missense_Mutation	SNP	ShallowDel
PSMA8	Lung Squamous Cell Carcinoma (TCGA, PanCancer Atlas)	TCGA-77-7463-01	LUSC	Non-Small Cell Lung Cancer	Lung Squamous Cell Carcinoma	D57Y		OncoKB: NA;CIViC: NA;MyCancerGenome: not present;CancerHotspot: no;3DHotspot: no	MutationAssessor: NA;SIFT: impact: deleterious, score: 0;Polyphen-2: impact: probably_damaging, score: 0.984	MutationAssessor: NA	SIFT: impact: deleterious_low_confidence, score: 0.02	Polyphen-2: impact: benign	0	Missense_Mutation	SNP	Gain
PSMA8	Lung Squamous Cell Carcinoma (TCGA, PanCancer Atlas)	TCGA-77-8128-01	LUSC	Non-Small Cell Lung Cancer	Lung Squamous Cell Carcinoma	H70N		OncoKB: NA;CIViC: NA;MyCancerGenome: not present;CancerHotspot: no;3DHotspot: no	MutationAssessor: NA;SIFT: impact: tolerated, score: 0.15;Polyphen-2: impact: benign, score: 0.183	MutationAssessor: NA	SIFT: impact: tolerated, score: 0.47	Polyphen-2: impact: possibly_damaging	0.79	Missense_Mutation	SNP	Gain
PSMA8	Lung Squamous Cell Carcinoma (TCGA, PanCancer Atlas)	TCGA-98-8021-01	LUSC	Non-Small Cell Lung Cancer	Lung Squamous Cell Carcinoma	I42V		OncoKB: NA;CIViC: NA;MyCancerGenome: not present;CancerHotspot: no;3DHotspot: no	MutationAssessor: NA;SIFT: impact: tolerated, score: 0.51;Polyphen-2: impact: benign, score: 0.005	MutationAssessor: NA	SIFT: impact: deleterious, score: 0	Polyphen-2: impact: possibly_damaging	0.69	Missense_Mutation	SNP	Gain
PSMA8	Lung Squamous Cell Carcinoma (TCGA, PanCancer Atlas)	TCGA-46-3768-01	LUSC	Non-Small Cell Lung Cancer	Lung Squamous Cell Carcinoma	X35_splice		OncoKB: NA;CIViC: NA;MyCancerGenome: not present;CancerHotspot: no;3DHotspot: no	MutationAssessor: NA;SIFT: NA;Polyphen-2: NA	MutationAssessor: NA	SIFT: impact: deleterious, score: 0	Polyphen-2: impact: possibly_damaging	score: 0.897	Splice_Site	SNP	ShallowDel
PSMA8	Bladder Urothelial Carcinoma (TCGA, PanCancer Atlas)	TCGA-2F-A9KT-01	BLCA	Bladder Urothelial Carcinoma	Bladder Urothelial Carcinoma	E48*		OncoKB: NA;CIViC: NA;MyCancerGenome: not present;CancerHotspot: no;3DHotspot: no	MutationAssessor: NA;SIFT: NA;Polyphen-2: NA	MutationAssessor: NA	SIFT: impact: deleterious, score: 0.05	Polyphen-2: impact: benign	0.17	Nonsense_Mutation	SNP	Diploid
PSMA8	Bladder Urothelial Carcinoma (TCGA, PanCancer Atlas)	TCGA-4Z-AA89-01	BLCA	Bladder Urothelial Carcinoma	Bladder Urothelial Carcinoma	D68H		OncoKB: NA;CIViC: NA;MyCancerGenome: not present;CancerHotspot: no;3DHotspot: no	MutationAssessor: NA;SIFT: impact: deleterious, score: 0;Polyphen-2: impact: probably_damaging, score: 1	MutationAssessor: NA	SIFT: impact: tolerated, score: 0.42	Polyphen-2: impact: benign	0.01	Missense_Mutation	SNP	Diploid
PSMA8	Bladder Urothelial Carcinoma (TCGA, PanCancer Atlas)	TCGA-FJ-A3ZF-01	BLCA	Bladder Urothelial Carcinoma	Bladder Urothelial Carcinoma	L78F		OncoKB: NA;CIViC: NA;MyCancerGenome: not present;CancerHotspot: no;3DHotspot: no	MutationAssessor: NA;SIFT: impact: tolerated_low_confidence, score: 0.18;Polyphen-2: impact: benign, score: 0.028	MutationAssessor: NA	SIFT: impact: deleterious, score: 0.02	Polyphen-2: impact: probably_damaging	0.95	Missense_Mutation	SNP	Amp
PSMA8	Bladder Urothelial Carcinoma (TCGA, PanCancer Atlas)	TCGA-UY-A78P-01	BLCA	Bladder Urothelial Carcinoma	Bladder Urothelial Carcinoma	E248Q		OncoKB: NA;CIViC: NA;MyCancerGenome: not present;CancerHotspot: no;3DHotspot: no	MutationAssessor: NA;SIFT: impact: tolerated, score: 0.4;Polyphen-2: impact: benign, score: 0.017	MutationAssessor: NA	SIFT: impact: deleterious, score: 0	Polyphen-2: impact: probably_damaging	1	Missense_Mutation	SNP	Diploid
PSMA8	Bladder Urothelial Carcinoma (TCGA, PanCancer Atlas)	TCGA-XF-AAML-01	BLCA	Bladder Urothelial Carcinoma	Bladder Urothelial Carcinoma	E181Q		OncoKB: NA;CIViC: NA;MyCancerGenome: not present;CancerHotspot: no;3DHotspot: no	MutationAssessor: NA;SIFT: impact: deleterious, score: 0.01;Polyphen-2: impact: possibly_damaging, score: 0.706	MutationAssessor: NA	SIFT: impact: deleterious, score: 0	Polyphen-2: impact: probably_damaging	1	Missense_Mutation	SNP	ShallowDel
PSMA8	Liver Hepatocellular Carcinoma (TCGA, PanCancer Atlas)	TCGA-KR-A7K8-01	LIHC	Hepatocellular Carcinoma	Hepatocellular Carcinoma	S252Ifs*16		OncoKB: NA;CIViC: NA;MyCancerGenome: not present;CancerHotspot: no;3DHotspot: no	MutationAssessor: NA;SIFT: NA;Polyphen-2: NA	MutationAssessor: NA	SIFT: impact: deleterious, score: 0	Polyphen-2: impact: probably_damaging	1	Frame_Shift_Ins	INS	Diploid
PSMA8	Prostate Adenocarcinoma (TCGA, PanCancer Atlas)	TCGA-VP-A87J-01	PRAD	Prostate Adenocarcinoma	Prostate Adenocarcinoma	H17N		OncoKB: NA;CIViC: NA;MyCancerGenome: not present;CancerHotspot: no;3DHotspot: no	MutationAssessor: NA;SIFT: impact: deleterious, score: 0.04;Polyphen-2: impact: benign, score: 0.292	MutationAssessor: NA	SIFT: impact: deleterious, score: 0	Polyphen-2: impact: probably_damaging	1	Missense_Mutation	SNP	Diploid
PSMA8	Uterine Corpus Endometrial Carcinoma (TCGA, PanCancer Atlas)	TCGA-AX-A05Z-01	UCEC	Endometrial Carcinoma	Uterine Endometrioid Carcinoma	R177*		OncoKB: NA;CIViC: NA;MyCancerGenome: not present;CancerHotspot: no;3DHotspot: no	MutationAssessor: NA;SIFT: NA;Polyphen-2: NA	MutationAssessor: NA	SIFT: impact: deleterious, score: 0	Polyphen-2: impact: probably_damaging	1	Nonsense_Mutation	SNP	Diploid
PSMA8	Uterine Corpus Endometrial Carcinoma (TCGA, PanCancer Atlas)	TCGA-AJ-A2QO-01	UCEC	Endometrial Carcinoma	Uterine Endometrioid Carcinoma	K50Nfs*12		OncoKB: NA;CIViC: NA;MyCancerGenome: not present;CancerHotspot: no;3DHotspot: no	MutationAssessor: NA;SIFT: NA;Polyphen-2: NA	MutationAssessor: NA	SIFT: NA	Polyphen-2: NA		Frame_Shift_Del	DEL	Diploid
PSMA8	Uterine Corpus Endometrial Carcinoma (TCGA, PanCancer Atlas)	TCGA-D1-A0ZO-01	UCEC	Endometrial Carcinoma	Uterine Endometrioid Carcinoma	K50Nfs*12		OncoKB: NA;CIViC: NA;MyCancerGenome: not present;CancerHotspot: no;3DHotspot: no	MutationAssessor: NA;SIFT: NA;Polyphen-2: NA	MutationAssessor: NA	SIFT: impact: deleterious, score: 0	Polyphen-2: impact: probably_damaging	0.97	Frame_Shift_Del	DEL	Diploid
PSMA8	Uterine Corpus Endometrial Carcinoma (TCGA, PanCancer Atlas)	TCGA-D1-A2G0-01	UCEC	Endometrial Carcinoma	Uterine Mixed Endometrial Carcinoma	K50Nfs*12		OncoKB: NA;CIViC: NA;MyCancerGenome: not present;CancerHotspot: no;3DHotspot: no	MutationAssessor: NA;SIFT: NA;Polyphen-2: NA	MutationAssessor: NA	SIFT: impact: deleterious, score: 0	Polyphen-2: impact: probably_damaging	0.97	Frame_Shift_Del	DEL	Gain
PSMA8	Uterine Corpus Endometrial Carcinoma (TCGA, PanCancer Atlas)	TCGA-AX-A1CE-01	UCEC	Endometrial Carcinoma	Uterine Endometrioid Carcinoma	R117H		OncoKB: NA;CIViC: NA;MyCancerGenome: not present;CancerHotspot: no;3DHotspot: no	MutationAssessor: NA;SIFT: impact: deleterious, score: 0.02;Polyphen-2: impact: possibly_damaging, score: 0.554	MutationAssessor: NA	SIFT: impact: deleterious, score: 0	Polyphen-2: impact: probably_damaging	1	Missense_Mutation	SNP	Diploid
PSMA8	Uterine Corpus Endometrial Carcinoma (TCGA, PanCancer Atlas)	TCGA-A5-A0G2-01	UCEC	Endometrial Carcinoma	Uterine Serous Carcinoma/Uterine Papillary Serous Carcinoma	E113*		OncoKB: NA;CIViC: NA;MyCancerGenome: not present;CancerHotspot: no;3DHotspot: no	MutationAssessor: NA;SIFT: NA;Polyphen-2: NA	MutationAssessor: NA	SIFT: impact: tolerated, score: 0.06	Polyphen-2: impact: benign	0.19	Nonsense_Mutation	SNP	Diploid
PSMA8	Uterine Corpus Endometrial Carcinoma (TCGA, PanCancer Atlas)	TCGA-AJ-A3EL-01	UCEC	Endometrial Carcinoma	Uterine Endometrioid Carcinoma	S51Y		OncoKB: NA;CIViC: NA;MyCancerGenome: not present;CancerHotspot: no;3DHotspot: no	MutationAssessor: NA;SIFT: impact: deleterious, score: 0;Polyphen-2: impact: probably_damaging, score: 0.976	MutationAssessor: NA	SIFT: NA	Polyphen-2: NA		Missense_Mutation	SNP	Diploid
PSMA8	Uterine Corpus Endometrial Carcinoma (TCGA, PanCancer Atlas)	TCGA-AJ-A3QS-01	UCEC	Endometrial Carcinoma	Uterine Serous Carcinoma/Uterine Papillary Serous Carcinoma	D146N		OncoKB: NA;CIViC: NA;MyCancerGenome: not present;CancerHotspot: no;3DHotspot: no	MutationAssessor: NA;SIFT: impact: tolerated, score: 0.52;Polyphen-2: impact: benign, score: 0.007	MutationAssessor: NA	SIFT: impact: deleterious, score: 0.01	Polyphen-2: impact: probably_damaging	0.99	Missense_Mutation	SNP	Gain
PSMA8	Uterine Corpus Endometrial Carcinoma (TCGA, PanCancer Atlas)	TCGA-AP-A0LF-01	UCEC	Endometrial Carcinoma	Uterine Endometrioid Carcinoma	Q100H		OncoKB: NA;CIViC: NA;MyCancerGenome: not present;CancerHotspot: no;3DHotspot: no	MutationAssessor: NA;SIFT: impact: deleterious, score: 0;Polyphen-2: impact: probably_damaging, score: 0.999	MutationAssessor: NA	SIFT: impact: deleterious, score: 0.03	Polyphen-2: impact: possibly_damaging	0.67	Missense_Mutation	SNP	Gain
PSMA8	Uterine Corpus Endometrial Carcinoma (TCGA, PanCancer Atlas)	TCGA-AP-A1DK-01	UCEC	Endometrial Carcinoma	Uterine Endometrioid Carcinoma	P109T		OncoKB: NA;CIViC: NA;MyCancerGenome: not present;CancerHotspot: no;3DHotspot: no	MutationAssessor: NA;SIFT: impact: deleterious, score: 0.02;Polyphen-2: impact: benign, score: 0.026	MutationAssessor: NA	SIFT: impact: tolerated, score: 0.08	Polyphen-2: impact: benign	0	Missense_Mutation	SNP	Diploid
PSMA8	Uterine Corpus Endometrial Carcinoma (TCGA, PanCancer Atlas)	TCGA-AX-A0J1-01	UCEC	Endometrial Carcinoma	Uterine Endometrioid Carcinoma	I82Yfs*6		OncoKB: NA;CIViC: NA;MyCancerGenome: not present;CancerHotspot: no;3DHotspot: no	MutationAssessor: NA;SIFT: NA;Polyphen-2: NA	MutationAssessor: NA	SIFT: impact: tolerated, score: 0.26	Polyphen-2: impact: benign	0.01	Frame_Shift_Ins	INS	Diploid
PSMA8	Uterine Corpus Endometrial Carcinoma (TCGA, PanCancer Atlas)	TCGA-AX-A1CE-01	UCEC	Endometrial Carcinoma	Uterine Endometrioid Carcinoma	I80S		OncoKB: NA;CIViC: NA;MyCancerGenome: not present;CancerHotspot: no;3DHotspot: no	MutationAssessor: NA;SIFT: impact: deleterious_low_confidence, score: 0.02;Polyphen-2: impact: benign, score: 0	MutationAssessor: NA	SIFT: impact: deleterious, score: 0	Polyphen-2: impact: probably_damaging	0.98	Missense_Mutation	SNP	Diploid
PSMA8	Uterine Corpus Endometrial Carcinoma (TCGA, PanCancer Atlas)	TCGA-B5-A1MR-01	UCEC	Endometrial Carcinoma	Uterine Endometrioid Carcinoma	K242N		OncoKB: NA;CIViC: NA;MyCancerGenome: not present;CancerHotspot: no;3DHotspot: no	MutationAssessor: NA;SIFT: impact: tolerated, score: 0.47;Polyphen-2: impact: possibly_damaging, score: 0.788	MutationAssessor: NA	SIFT: impact: deleterious, score: 0.01	Polyphen-2: impact: benign	0.25	Missense_Mutation	SNP	Diploid
PSMA8	Uterine Corpus Endometrial Carcinoma (TCGA, PanCancer Atlas)	TCGA-B5-A3FA-01	UCEC	Endometrial Carcinoma	Uterine Endometrioid Carcinoma	X77_splice		OncoKB: NA;CIViC: NA;MyCancerGenome: not present;CancerHotspot: no;3DHotspot: no	MutationAssessor: NA;SIFT: NA;Polyphen-2: NA	MutationAssessor: NA	SIFT: impact: tolerated, score: 0.61	Polyphen-2: impact: benign	score: 0.03	Splice_Site	SNP	Diploid
PSMA8	Uterine Corpus Endometrial Carcinoma (TCGA, PanCancer Atlas)	TCGA-B5-A3FA-01	UCEC	Endometrial Carcinoma	Uterine Endometrioid Carcinoma	F135L		OncoKB: NA;CIViC: NA;MyCancerGenome: not present;CancerHotspot: no;3DHotspot: no	MutationAssessor: NA;SIFT: impact: deleterious, score: 0;Polyphen-2: impact: possibly_damaging, score: 0.692	MutationAssessor: NA	SIFT: impact: tolerated, score: 0.22	Polyphen-2: impact: benign	0.01	Missense_Mutation	SNP	Diploid
PSMA8	Uterine Corpus Endometrial Carcinoma (TCGA, PanCancer Atlas)	TCGA-EO-A22X-01	UCEC	Endometrial Carcinoma	Uterine Endometrioid Carcinoma	I141T		OncoKB: NA;CIViC: NA;MyCancerGenome: not present;CancerHotspot: no;3DHotspot: no	MutationAssessor: NA;SIFT: impact: deleterious, score: 0;Polyphen-2: impact: possibly_damaging, score: 0.897	MutationAssessor: NA	SIFT: NA	Polyphen-2: NA		Missense_Mutation	SNP	Diploid
PSMA8	Uterine Corpus Endometrial Carcinoma (TCGA, PanCancer Atlas)	TCGA-EO-A22X-01	UCEC	Endometrial Carcinoma	Uterine Endometrioid Carcinoma	F144V		OncoKB: NA;CIViC: NA;MyCancerGenome: not present;CancerHotspot: no;3DHotspot: no	MutationAssessor: NA;SIFT: impact: deleterious, score: 0.05;Polyphen-2: impact: benign, score: 0.166	MutationAssessor: NA	SIFT: NA	Polyphen-2: NA		Missense_Mutation	SNP	Diploid
PSMA8	Uterine Corpus Endometrial Carcinoma (TCGA, PanCancer Atlas)	TCGA-EO-A3AV-01	UCEC	Endometrial Carcinoma	Uterine Endometrioid Carcinoma	D146G		OncoKB: NA;CIViC: NA;MyCancerGenome: not present;CancerHotspot: no;3DHotspot: no	MutationAssessor: NA;SIFT: impact: tolerated, score: 0.42;Polyphen-2: impact: benign, score: 0.007	MutationAssessor: NA	SIFT: NA	Polyphen-2: NA		Missense_Mutation	SNP	Diploid
PSMA8	Uterine Corpus Endometrial Carcinoma (TCGA, PanCancer Atlas)	TCGA-EO-A3AV-01	UCEC	Endometrial Carcinoma	Uterine Endometrioid Carcinoma	K182N		OncoKB: NA;CIViC: NA;MyCancerGenome: not present;CancerHotspot: no;3DHotspot: no	MutationAssessor: NA;SIFT: impact: deleterious, score: 0.02;Polyphen-2: impact: probably_damaging, score: 0.954	MutationAssessor: NA	SIFT: NA	Polyphen-2: NA		Missense_Mutation	SNP	Diploid
PSMA8	Uterine Corpus Endometrial Carcinoma (TCGA, PanCancer Atlas)	TCGA-FI-A2D5-01	UCEC	Endometrial Carcinoma	Uterine Endometrioid Carcinoma	D87G		OncoKB: NA;CIViC: NA;MyCancerGenome: not present;CancerHotspot: no;3DHotspot: no	MutationAssessor: NA;SIFT: impact: deleterious, score: 0;Polyphen-2: impact: probably_damaging, score: 0.999	MutationAssessor: NA	SIFT: NA	Polyphen-2: NA		Missense_Mutation	SNP	Diploid
PSMA8	Lung Adenocarcinoma (TCGA, PanCancer Atlas)	TCGA-78-7155-01	LUAD	Non-Small Cell Lung Cancer	Lung Adenocarcinoma	X125_splice		OncoKB: NA;CIViC: NA;MyCancerGenome: not present;CancerHotspot: no;3DHotspot: no	MutationAssessor: NA;SIFT: NA;Polyphen-2: NA	MutationAssessor: NA	SIFT: impact: deleterious, score: 0.01	Polyphen-2: impact: probably_damaging	score: 0.917	Splice_Site	SNP	Gain
PSMA8	Lung Adenocarcinoma (TCGA, PanCancer Atlas)	TCGA-78-7220-01	LUAD	Non-Small Cell Lung Cancer	Lung Adenocarcinoma	C99W		OncoKB: NA;CIViC: NA;MyCancerGenome: not present;CancerHotspot: no;3DHotspot: no	MutationAssessor: NA;SIFT: impact: deleterious, score: 0;Polyphen-2: impact: probably_damaging, score: 0.998	MutationAssessor: NA	SIFT: NA	Polyphen-2: NA		Missense_Mutation	SNP	Diploid
PSMA8	Lung Adenocarcinoma (TCGA, PanCancer Atlas)	TCGA-L9-A7SV-01	LUAD	Non-Small Cell Lung Cancer	Lung Adenocarcinoma	G46V		OncoKB: NA;CIViC: NA;MyCancerGenome: not present;CancerHotspot: no;3DHotspot: no	MutationAssessor: NA;SIFT: impact: deleterious, score: 0;Polyphen-2: impact: probably_damaging, score: 0.996	MutationAssessor: NA	SIFT: impact: deleterious, score: 0.02	Polyphen-2: impact: probably_damaging	0.99	Missense_Mutation	SNP	Gain
PSMA8	Skin Cutaneous Melanoma (TCGA, PanCancer Atlas)	TCGA-EE-A2GO-06	SKCM	Melanoma	Cutaneous Melanoma	G16E		OncoKB: NA;CIViC: NA;MyCancerGenome: not present;CancerHotspot: no;3DHotspot: no	MutationAssessor: NA;SIFT: impact: deleterious, score: 0;Polyphen-2: impact: probably_damaging, score: 1	MutationAssessor: NA	SIFT: impact: deleterious, score: 0	Polyphen-2: impact: possibly_damaging	0.79	Missense_Mutation	SNP	Diploid
PSMA8	Skin Cutaneous Melanoma (TCGA, PanCancer Atlas)	TCGA-FR-A8YC-06	SKCM	Melanoma	Cutaneous Melanoma	G16E		OncoKB: NA;CIViC: NA;MyCancerGenome: not present;CancerHotspot: no;3DHotspot: no	MutationAssessor: NA;SIFT: impact: deleterious, score: 0;Polyphen-2: impact: probably_damaging, score: 1	MutationAssessor: NA	SIFT: NA	Polyphen-2: NA		Missense_Mutation	SNP	Diploid
PSMA8	Skin Cutaneous Melanoma (TCGA, PanCancer Atlas)	TCGA-EE-A181-06	SKCM	Melanoma	Cutaneous Melanoma	Q20*		OncoKB: NA;CIViC: NA;MyCancerGenome: not present;CancerHotspot: no;3DHotspot: no	MutationAssessor: NA;SIFT: NA;Polyphen-2: NA	MutationAssessor: NA	SIFT: NA	Polyphen-2: NA		Nonsense_Mutation	SNP	Gain
PSMA8	Skin Cutaneous Melanoma (TCGA, PanCancer Atlas)	TCGA-3N-A9WC-06	SKCM	Melanoma	Cutaneous Melanoma	S51F		OncoKB: NA;CIViC: NA;MyCancerGenome: not present;CancerHotspot: no;3DHotspot: no	MutationAssessor: NA;SIFT: impact: deleterious, score: 0;Polyphen-2: impact: probably_damaging, score: 0.965	MutationAssessor: NA	SIFT: impact: tolerated, score: 0.09	Polyphen-2: impact: benign	0.07	Missense_Mutation	SNP	Diploid
PSMA8	Skin Cutaneous Melanoma (TCGA, PanCancer Atlas)	TCGA-IH-A3EA-01	SKCM	Melanoma	Cutaneous Melanoma	S51F		OncoKB: NA;CIViC: NA;MyCancerGenome: not present;CancerHotspot: no;3DHotspot: no	MutationAssessor: NA;SIFT: impact: deleterious, score: 0;Polyphen-2: impact: probably_damaging, score: 0.965	MutationAssessor: NA	SIFT: impact: tolerated, score: 0.64	Polyphen-2: impact: benign	0	Missense_Mutation	SNP
PSMA8	Skin Cutaneous Melanoma (TCGA, PanCancer Atlas)	TCGA-EB-A3Y7-01	SKCM	Melanoma	Cutaneous Melanoma	G136D		OncoKB: NA;CIViC: NA;MyCancerGenome: not present;CancerHotspot: no;3DHotspot: no	MutationAssessor: NA;SIFT: impact: deleterious, score: 0;Polyphen-2: impact: probably_damaging, score: 0.999	MutationAssessor: NA	SIFT: NA	Polyphen-2: NA		Missense_Mutation	SNP
PSMA8	Skin Cutaneous Melanoma (TCGA, PanCancer Atlas)	TCGA-EE-A17X-06	SKCM	Melanoma	Cutaneous Melanoma	V206A		OncoKB: NA;CIViC: NA;MyCancerGenome: not present;CancerHotspot: no;3DHotspot: no	MutationAssessor: NA;SIFT: impact: tolerated, score: 0.06;Polyphen-2: impact: benign, score: 0.19	MutationAssessor: NA	SIFT: impact: deleterious, score: 0.01	Polyphen-2: impact: possibly_damaging	0.54	Missense_Mutation	SNP	Diploid
PSMA8	Skin Cutaneous Melanoma (TCGA, PanCancer Atlas)	TCGA-D9-A6EC-06	SKCM	Melanoma	Cutaneous Melanoma	R4*		OncoKB: NA;CIViC: NA;MyCancerGenome: not present;CancerHotspot: no;3DHotspot: no	MutationAssessor: NA;SIFT: NA;Polyphen-2: NA	MutationAssessor: NA	SIFT: impact: tolerated, score: 0.2	Polyphen-2: impact: benign	0.12	Nonsense_Mutation	SNP	Gain
PSMA8	Skin Cutaneous Melanoma (TCGA, PanCancer Atlas)	TCGA-EE-A181-06	SKCM	Melanoma	Cutaneous Melanoma	X227_splice		OncoKB: NA;CIViC: NA;MyCancerGenome: not present;CancerHotspot: no;3DHotspot: no	MutationAssessor: NA;SIFT: NA;Polyphen-2: NA	MutationAssessor: NA	SIFT: impact: deleterious, score: 0.02	Polyphen-2: impact: probably_damaging	score: 0.954	Splice_Region	SNP	Gain
PSMA8	Stomach Adenocarcinoma (TCGA, PanCancer Atlas)	TCGA-MX-A5UJ-01	STAD	Esophagogastric Adenocarcinoma	Tubular Stomach Adenocarcinoma	G16R		OncoKB: NA;CIViC: NA;MyCancerGenome: not present;CancerHotspot: no;3DHotspot: no	MutationAssessor: NA;SIFT: impact: deleterious, score: 0.01;Polyphen-2: impact: probably_damaging, score: 0.99	MutationAssessor: NA	SIFT: NA	Polyphen-2: NA		Missense_Mutation	SNP	Diploid
PSMA8	Stomach Adenocarcinoma (TCGA, PanCancer Atlas)	TCGA-BR-6452-01	STAD	Esophagogastric Adenocarcinoma	Stomach Adenocarcinoma	N130D		OncoKB: NA;CIViC: NA;MyCancerGenome: not present;CancerHotspot: no;3DHotspot: no	MutationAssessor: NA;SIFT: impact: deleterious, score: 0.03;Polyphen-2: impact: possibly_damaging, score: 0.673	MutationAssessor: NA	SIFT: NA	Polyphen-2: NA		Missense_Mutation	SNP	Diploid
PSMA8	Stomach Adenocarcinoma (TCGA, PanCancer Atlas)	TCGA-BR-8360-01	STAD	Esophagogastric Adenocarcinoma	Intestinal Type Stomach Adenocarcinoma	E243G		OncoKB: NA;CIViC: NA;MyCancerGenome: not present;CancerHotspot: no;3DHotspot: no	MutationAssessor: NA;SIFT: impact: tolerated, score: 0.08;Polyphen-2: impact: benign, score: 0	MutationAssessor: NA	SIFT: NA	Polyphen-2: NA		Missense_Mutation	SNP	Diploid
PSMA8	Stomach Adenocarcinoma (TCGA, PanCancer Atlas)	TCGA-CG-4442-01	STAD	Esophagogastric Adenocarcinoma	Intestinal Type Stomach Adenocarcinoma	A188V		OncoKB: NA;CIViC: NA;MyCancerGenome: not present;CancerHotspot: no;3DHotspot: no	MutationAssessor: NA;SIFT: impact: tolerated, score: 0.26;Polyphen-2: impact: benign, score: 0.005	MutationAssessor: NA	SIFT: NA	Polyphen-2: NA		Missense_Mutation	SNP	Diploid
PSMA8	Stomach Adenocarcinoma (TCGA, PanCancer Atlas)	TCGA-VQ-A8P2-01	STAD	Esophagogastric Adenocarcinoma	Mucinous Stomach Adenocarcinoma	A8V		OncoKB: NA;CIViC: NA;MyCancerGenome: not present;CancerHotspot: no;3DHotspot: no	MutationAssessor: NA;SIFT: impact: deleterious, score: 0;Polyphen-2: impact: probably_damaging, score: 0.984	MutationAssessor: NA	SIFT: NA	Polyphen-2: NA		Missense_Mutation	SNP	Diploid
PSMA8	Breast Invasive Carcinoma (TCGA, PanCancer Atlas)	TCGA-AC-A5EH-01	BRCA	Invasive Breast Carcinoma	Breast Invasive Ductal Carcinoma	H17Q		OncoKB: NA;CIViC: NA;MyCancerGenome: not present;CancerHotspot: no;3DHotspot: no	MutationAssessor: NA;SIFT: impact: deleterious, score: 0.01;Polyphen-2: impact: benign, score: 0.254	MutationAssessor: NA	SIFT: NA	Polyphen-2: NA		Missense_Mutation	SNP	ShallowDel
PSMA8	Breast Invasive Carcinoma (TCGA, PanCancer Atlas)	TCGA-A8-A07P-01	BRCA	Invasive Breast Carcinoma	Breast Invasive Ductal Carcinoma	I92V		OncoKB: NA;CIViC: NA;MyCancerGenome: not present;CancerHotspot: no;3DHotspot: no	MutationAssessor: NA;SIFT: impact: tolerated, score: 0.61;Polyphen-2: impact: benign, score: 0.03	MutationAssessor: NA	SIFT: NA	Polyphen-2: NA		Missense_Mutation	SNP	Gain
PSMA8	Colorectal Adenocarcinoma (TCGA, PanCancer Atlas)	TCGA-AG-A002-01	READ	Colorectal Adenocarcinoma	Rectal Adenocarcinoma	K249N		OncoKB: NA;CIViC: NA;MyCancerGenome: not present;CancerHotspot: no;3DHotspot: no	MutationAssessor: NA;SIFT: impact: tolerated, score: 0.22;Polyphen-2: impact: benign, score: 0.014	MutationAssessor: NA	SIFT: NA	Polyphen-2: NA		Missense_Mutation	SNP	Diploid
PSMA8	Colorectal Adenocarcinoma (TCGA, PanCancer Atlas)	TCGA-EI-6882-01	READ	Colorectal Adenocarcinoma	Rectal Adenocarcinoma	R38*		OncoKB: NA;CIViC: NA;MyCancerGenome: not present;CancerHotspot: no;3DHotspot: no	MutationAssessor: NA;SIFT: NA;Polyphen-2: NA	MutationAssessor: NA	SIFT: NA	Polyphen-2: NA		Nonsense_Mutation	SNP	Diploid
PSMA8	Colorectal Adenocarcinoma (TCGA, PanCancer Atlas)	TCGA-AA-3984-01	COAD	Colorectal Adenocarcinoma	Colon Adenocarcinoma	R38*		OncoKB: NA;CIViC: NA;MyCancerGenome: not present;CancerHotspot: no;3DHotspot: no	MutationAssessor: NA;SIFT: NA;Polyphen-2: NA	MutationAssessor: NA	SIFT: NA	Polyphen-2: NA		Nonsense_Mutation	SNP	Diploid
PSMA8	Colorectal Adenocarcinoma (TCGA, PanCancer Atlas)	TCGA-EI-6917-01	READ	Colorectal Adenocarcinoma	Rectal Adenocarcinoma	R177*		OncoKB: NA;CIViC: NA;MyCancerGenome: not present;CancerHotspot: no;3DHotspot: no	MutationAssessor: NA;SIFT: NA;Polyphen-2: NA	MutationAssessor: NA	SIFT: NA	Polyphen-2: NA		Nonsense_Mutation	SNP	Diploid
PSMA8	Colorectal Adenocarcinoma (TCGA, PanCancer Atlas)	TCGA-AA-3864-01	COAD	Colorectal Adenocarcinoma	Colon Adenocarcinoma	R171*		OncoKB: NA;CIViC: NA;MyCancerGenome: not present;CancerHotspot: no;3DHotspot: no	MutationAssessor: NA;SIFT: NA;Polyphen-2: NA	MutationAssessor: NA	SIFT: NA	Polyphen-2: NA		Nonsense_Mutation	SNP	Diploid
PSMA8	Colorectal Adenocarcinoma (TCGA, PanCancer Atlas)	TCGA-CM-4743-01	COAD	Colorectal Adenocarcinoma	Colon Adenocarcinoma	N213Kfs*3		OncoKB: NA;CIViC: NA;MyCancerGenome: not present;CancerHotspot: no;3DHotspot: no	MutationAssessor: NA;SIFT: NA;Polyphen-2: NA	MutationAssessor: NA	SIFT: NA	Polyphen-2: NA		Frame_Shift_Ins	INS	Diploid
PSMA8	Colorectal Adenocarcinoma (TCGA, PanCancer Atlas)	TCGA-F5-6814-01	READ	Colorectal Adenocarcinoma	Rectal Adenocarcinoma	L203V		OncoKB: NA;CIViC: NA;MyCancerGenome: not present;CancerHotspot: no;3DHotspot: no	MutationAssessor: NA;SIFT: impact: deleterious, score: 0.01;Polyphen-2: impact: probably_damaging, score: 0.917	MutationAssessor: NA	SIFT: NA	Polyphen-2: NA		Missense_Mutation	SNP	Diploid
PSMA8	Colorectal Adenocarcinoma (TCGA, PanCancer Atlas)	TCGA-F5-6814-01	READ	Colorectal Adenocarcinoma	Rectal Adenocarcinoma	E232*		OncoKB: NA;CIViC: NA;MyCancerGenome: not present;CancerHotspot: no;3DHotspot: no	MutationAssessor: NA;SIFT: NA;Polyphen-2: NA	MutationAssessor: NA	SIFT: NA	Polyphen-2: NA		Nonsense_Mutation	SNP	Diploid
PSMA8	Colorectal Adenocarcinoma (TCGA, PanCancer Atlas)	TCGA-A6-6654-01	COAD	Colorectal Adenocarcinoma	Colon Adenocarcinoma	R7K		OncoKB: NA;CIViC: NA;MyCancerGenome: not present;CancerHotspot: no;3DHotspot: no	MutationAssessor: NA;SIFT: impact: deleterious, score: 0.02;Polyphen-2: impact: probably_damaging, score: 0.994	MutationAssessor: NA	SIFT: NA	Polyphen-2: NA		Missense_Mutation	SNP	ShallowDel
PSMA8	Colorectal Adenocarcinoma (TCGA, PanCancer Atlas)	TCGA-AA-3510-01	COAD	Colorectal Adenocarcinoma	Colon Adenocarcinoma	A195D		OncoKB: NA;CIViC: NA;MyCancerGenome: not present;CancerHotspot: no;3DHotspot: no	MutationAssessor: NA;SIFT: impact: deleterious, score: 0;Polyphen-2: impact: possibly_damaging, score: 0.786	MutationAssessor: NA	SIFT: NA	Polyphen-2: NA		Missense_Mutation	SNP	Diploid
PSMA8	Colorectal Adenocarcinoma (TCGA, PanCancer Atlas)	TCGA-AA-3845-01	COAD	Colorectal Adenocarcinoma	Colon Adenocarcinoma	K251Nfs*9		OncoKB: NA;CIViC: NA;MyCancerGenome: not present;CancerHotspot: no;3DHotspot: no	MutationAssessor: NA;SIFT: NA;Polyphen-2: NA	MutationAssessor: NA	SIFT: NA	Polyphen-2: NA		Frame_Shift_Del	DEL	Diploid
PSMA8	Colorectal Adenocarcinoma (TCGA, PanCancer Atlas)	TCGA-G4-6628-01	COAD	Colorectal Adenocarcinoma	Colon Adenocarcinoma	R132*		OncoKB: NA;CIViC: NA;MyCancerGenome: not present;CancerHotspot: no;3DHotspot: no	MutationAssessor: NA;SIFT: NA;Polyphen-2: NA	MutationAssessor: NA	SIFT: NA	Polyphen-2: NA		Nonsense_Mutation	SNP	Diploid
PSMA8	Kidney Renal Papillary Cell Carcinoma (TCGA, PanCancer Atlas)	TCGA-BQ-5885-01	KIRP	Renal Non-Clear Cell Carcinoma	Papillary Renal Cell Carcinoma	N93S		OncoKB: NA;CIViC: NA;MyCancerGenome: not present;CancerHotspot: no;3DHotspot: no	MutationAssessor: NA;SIFT: impact: tolerated, score: 0.09;Polyphen-2: impact: benign, score: 0.065	MutationAssessor: NA	SIFT: NA	Polyphen-2: NA		Missense_Mutation	SNP	Diploid
PSMA8	Head and Neck Squamous Cell Carcinoma (TCGA, PanCancer Atlas)	TCGA-CR-6478-01	HNSC	Head and Neck Squamous Cell Carcinoma	Head and Neck Squamous Cell Carcinoma	E248K		OncoKB: NA;CIViC: NA;MyCancerGenome: not present;CancerHotspot: no;3DHotspot: no	MutationAssessor: NA;SIFT: impact: tolerated, score: 0.64;Polyphen-2: impact: benign, score: 0	MutationAssessor: NA	SIFT: NA	Polyphen-2: NA		Missense_Mutation	SNP	Diploid
PSMA8	Head and Neck Squamous Cell Carcinoma (TCGA, PanCancer Atlas)	TCGA-CN-6988-01	HNSC	Head and Neck Squamous Cell Carcinoma	Head and Neck Squamous Cell Carcinoma	S252Ifs*16		OncoKB: NA;CIViC: NA;MyCancerGenome: not present;CancerHotspot: no;3DHotspot: no	MutationAssessor: NA;SIFT: NA;Polyphen-2: NA	MutationAssessor: NA	SIFT: NA	Polyphen-2: NA		Frame_Shift_Ins	INS	ShallowDel
PSMA8	Head and Neck Squamous Cell Carcinoma (TCGA, PanCancer Atlas)	TCGA-CV-5432-01	HNSC	Head and Neck Squamous Cell Carcinoma	Head and Neck Squamous Cell Carcinoma	K123R		OncoKB: NA;CIViC: NA;MyCancerGenome: not present;CancerHotspot: no;3DHotspot: no	MutationAssessor: NA;SIFT: impact: deleterious, score: 0.01;Polyphen-2: impact: possibly_damaging, score: 0.539	MutationAssessor: NA	SIFT: NA	Polyphen-2: NA		Missense_Mutation	SNP	Gain
PSMA8	Cervical Squamous Cell Carcinoma (TCGA, PanCancer Atlas)	TCGA-EA-A3HU-01	CESC	Cervical Squamous Cell Carcinoma	Cervical Squamous Cell Carcinoma	A34V		OncoKB: NA;CIViC: NA;MyCancerGenome: not present;CancerHotspot: no;3DHotspot: no	MutationAssessor: NA;SIFT: impact: tolerated, score: 0.2;Polyphen-2: impact: benign, score: 0.122	MutationAssessor: NA	SIFT: NA	Polyphen-2: NA		Missense_Mutation	SNP
PSMA8	Cervical Squamous Cell Carcinoma (TCGA, PanCancer Atlas)	TCGA-BI-A0VS-01	CESC	Cervical Squamous Cell Carcinoma	Cervical Squamous Cell Carcinoma	K182N		OncoKB: NA;CIViC: NA;MyCancerGenome: not present;CancerHotspot: no;3DHotspot: no	MutationAssessor: NA;SIFT: impact: deleterious, score: 0.02;Polyphen-2: impact: probably_damaging, score: 0.954	MutationAssessor: NA	SIFT: NA	Polyphen-2: NA		Missense_Mutation	SNP	Diploid
PSMB10	Cervical Squamous Cell Carcinoma (TCGA, PanCancer Atlas)	TCGA-VS-A959-01	CESC	Cervical Squamous Cell Carcinoma	Cervical Squamous Cell Carcinoma	PSKH1-PSMB10		OncoKB: Unknown, level NA, resistance NA;CIViC: NA;MyCancerGenome: not present;CancerHotspot: no;3DHotspot: no	MutationAssessor: NA;SIFT: NA;Polyphen-2: NA	MutationAssessor: NA	SIFT: NA	Polyphen-2: NA		fusion	FUSION	Diploid
PSMB10	Thyroid Carcinoma (TCGA, PanCancer Atlas)	TCGA-EM-A2CN-01	THCA	Well-Differentiated Thyroid Cancer	Papillary Thyroid Cancer	Q48K		OncoKB: NA;CIViC: NA;MyCancerGenome: not present;CancerHotspot: no;3DHotspot: no	MutationAssessor: NA;SIFT: NA;Polyphen-2: NA	MutationAssessor: NA	SIFT: NA	Polyphen-2: NA		Missense_Mutation	SNP	Diploid
PSMB10	Bladder Urothelial Carcinoma (TCGA, PanCancer Atlas)	TCGA-ZF-A9RC-01	BLCA	Bladder Urothelial Carcinoma	Bladder Urothelial Carcinoma	E273Q		OncoKB: NA;CIViC: NA;MyCancerGenome: not present;CancerHotspot: no;3DHotspot: no	MutationAssessor: NA;SIFT: NA;Polyphen-2: NA	MutationAssessor: NA	SIFT: NA	Polyphen-2: NA		Missense_Mutation	SNP	Gain
PSMB10	Acute Myeloid Leukemia (TCGA, PanCancer Atlas)	TCGA-AB-2867-03	LAML	Leukemia	Acute Myeloid Leukemia	G110D		OncoKB: NA;CIViC: NA;MyCancerGenome: not present;CancerHotspot: no;3DHotspot: no	MutationAssessor: NA;SIFT: NA;Polyphen-2: NA	MutationAssessor: NA	SIFT: NA	Polyphen-2: NA		Missense_Mutation	SNP	Diploid
PSMB10	Liver Hepatocellular Carcinoma (TCGA, PanCancer Atlas)	TCGA-ED-A7XP-01	LIHC	Hepatocellular Carcinoma	Hepatocellular Carcinoma	H242Y		OncoKB: NA;CIViC: NA;MyCancerGenome: not present;CancerHotspot: no;3DHotspot: no	MutationAssessor: NA;SIFT: NA;Polyphen-2: NA	MutationAssessor: NA	SIFT: NA	Polyphen-2: NA		Missense_Mutation	SNP	Diploid
PSMB10	Kidney Renal Clear Cell Carcinoma (TCGA, PanCancer Atlas)	TCGA-A3-A8OU-01	KIRC	Renal Clear Cell Carcinoma	Renal Clear Cell Carcinoma	T259A		OncoKB: NA;CIViC: NA;MyCancerGenome: not present;CancerHotspot: no;3DHotspot: no	MutationAssessor: NA;SIFT: NA;Polyphen-2: NA	MutationAssessor: NA	SIFT: NA	Polyphen-2: NA		Missense_Mutation	SNP	Diploid
PSMB10	Uterine Corpus Endometrial Carcinoma (TCGA, PanCancer Atlas)	TCGA-E6-A1LX-01	UCEC	Endometrial Carcinoma	Uterine Endometrioid Carcinoma	E15D		OncoKB: NA;CIViC: NA;MyCancerGenome: not present;CancerHotspot: no;3DHotspot: no	MutationAssessor: NA;SIFT: NA;Polyphen-2: NA	MutationAssessor: NA	SIFT: NA	Polyphen-2: NA		Missense_Mutation	SNP	Diploid
PSMB10	Uterine Corpus Endometrial Carcinoma (TCGA, PanCancer Atlas)	TCGA-B5-A0JY-01	UCEC	Endometrial Carcinoma	Uterine Endometrioid Carcinoma	N16D		OncoKB: NA;CIViC: NA;MyCancerGenome: not present;CancerHotspot: no;3DHotspot: no	MutationAssessor: NA;SIFT: NA;Polyphen-2: NA	MutationAssessor: NA	SIFT: NA	Polyphen-2: NA		Missense_Mutation	SNP	Diploid
PSMB10	Uterine Corpus Endometrial Carcinoma (TCGA, PanCancer Atlas)	TCGA-BS-A0UV-01	UCEC	Endometrial Carcinoma	Uterine Endometrioid Carcinoma	L53M		OncoKB: NA;CIViC: NA;MyCancerGenome: not present;CancerHotspot: no;3DHotspot: no	MutationAssessor: NA;SIFT: NA;Polyphen-2: NA	MutationAssessor: NA	SIFT: NA	Polyphen-2: NA		Missense_Mutation	SNP	Diploid
PSMB10	Uterine Corpus Endometrial Carcinoma (TCGA, PanCancer Atlas)	TCGA-AP-A1DP-01	UCEC	Endometrial Carcinoma	Uterine Endometrioid Carcinoma	R240H		OncoKB: NA;CIViC: NA;MyCancerGenome: not present;CancerHotspot: no;3DHotspot: no	MutationAssessor: NA;SIFT: NA;Polyphen-2: NA	MutationAssessor: NA	SIFT: NA	Polyphen-2: NA		Missense_Mutation	SNP	Diploid
PSMB10	Uterine Corpus Endometrial Carcinoma (TCGA, PanCancer Atlas)	TCGA-A5-A1OF-01	UCEC	Endometrial Carcinoma	Uterine Mixed Endometrial Carcinoma	I121S		OncoKB: NA;CIViC: NA;MyCancerGenome: not present;CancerHotspot: no;3DHotspot: no	MutationAssessor: NA;SIFT: NA;Polyphen-2: NA	MutationAssessor: NA	SIFT: NA	Polyphen-2: NA		Missense_Mutation	SNP	Diploid
PSMB10	Uterine Corpus Endometrial Carcinoma (TCGA, PanCancer Atlas)	TCGA-AP-A1DK-01	UCEC	Endometrial Carcinoma	Uterine Endometrioid Carcinoma	P78L		OncoKB: NA;CIViC: NA;MyCancerGenome: not present;CancerHotspot: no;3DHotspot: no	MutationAssessor: NA;SIFT: NA;Polyphen-2: NA	MutationAssessor: NA	SIFT: NA	Polyphen-2: NA		Missense_Mutation	SNP	Diploid
PSMB10	Uterine Corpus Endometrial Carcinoma (TCGA, PanCancer Atlas)	TCGA-B5-A3FC-01	UCEC	Endometrial Carcinoma	Uterine Endometrioid Carcinoma	L187=		OncoKB: NA;CIViC: NA;MyCancerGenome: not present;CancerHotspot: no;3DHotspot: no	MutationAssessor: NA;SIFT: NA;Polyphen-2: NA	MutationAssessor: NA	SIFT: NA	Polyphen-2: NA		Splice_Region	SNP	Diploid
PSMB10	Lung Adenocarcinoma (TCGA, PanCancer Atlas)	TCGA-55-7281-01	LUAD	Non-Small Cell Lung Cancer	Lung Adenocarcinoma	R120S		OncoKB: NA;CIViC: NA;MyCancerGenome: not present;CancerHotspot: no;3DHotspot: no	MutationAssessor: NA;SIFT: NA;Polyphen-2: NA	MutationAssessor: NA	SIFT: NA	Polyphen-2: NA		Missense_Mutation	SNP	ShallowDel
PSMB10	Esophageal Adenocarcinoma (TCGA, PanCancer Atlas)	TCGA-LN-A49U-01	ESCA	Esophageal Squamous Cell Carcinoma	Esophageal Squamous Cell Carcinoma	S229Tfs*46		OncoKB: NA;CIViC: NA;MyCancerGenome: not present;CancerHotspot: no;3DHotspot: no	MutationAssessor: NA;SIFT: NA;Polyphen-2: NA	MutationAssessor: NA	SIFT: NA	Polyphen-2: NA		Frame_Shift_Del	DEL	Diploid
PSMB10	Skin Cutaneous Melanoma (TCGA, PanCancer Atlas)	TCGA-FS-A1ZA-06	SKCM	Melanoma	Cutaneous Melanoma	S108Y		OncoKB: NA;CIViC: NA;MyCancerGenome: not present;CancerHotspot: no;3DHotspot: no	MutationAssessor: NA;SIFT: NA;Polyphen-2: NA	MutationAssessor: NA	SIFT: NA	Polyphen-2: NA		Missense_Mutation	SNP	Diploid
PSMB10	Skin Cutaneous Melanoma (TCGA, PanCancer Atlas)	TCGA-D3-A2J6-06	SKCM	Melanoma	Cutaneous Melanoma	G151C		OncoKB: NA;CIViC: NA;MyCancerGenome: not present;CancerHotspot: no;3DHotspot: no	MutationAssessor: NA;SIFT: NA;Polyphen-2: NA	MutationAssessor: NA	SIFT: NA	Polyphen-2: NA		Missense_Mutation	SNP	ShallowDel
PSMB10	Skin Cutaneous Melanoma (TCGA, PanCancer Atlas)	TCGA-ER-A19P-06	SKCM	Melanoma	Cutaneous Melanoma	Q48K		OncoKB: NA;CIViC: NA;MyCancerGenome: not present;CancerHotspot: no;3DHotspot: no	MutationAssessor: NA;SIFT: NA;Polyphen-2: NA	MutationAssessor: NA	SIFT: NA	Polyphen-2: NA		Missense_Mutation	SNP	Gain
PSMB10	Skin Cutaneous Melanoma (TCGA, PanCancer Atlas)	TCGA-D9-A1X3-06	SKCM	Melanoma	Cutaneous Melanoma	R96L		OncoKB: NA;CIViC: NA;MyCancerGenome: not present;CancerHotspot: no;3DHotspot: no	MutationAssessor: NA;SIFT: NA;Polyphen-2: NA	MutationAssessor: NA	SIFT: NA	Polyphen-2: NA		Missense_Mutation	SNP	Diploid
PSMB10	Stomach Adenocarcinoma (TCGA, PanCancer Atlas)	TCGA-CG-5721-01	STAD	Esophagogastric Adenocarcinoma	Intestinal Type Stomach Adenocarcinoma	A214S		OncoKB: NA;CIViC: NA;MyCancerGenome: not present;CancerHotspot: no;3DHotspot: no	MutationAssessor: NA;SIFT: NA;Polyphen-2: NA	MutationAssessor: NA	SIFT: NA	Polyphen-2: NA		Missense_Mutation	SNP	Diploid
PSMB10	Stomach Adenocarcinoma (TCGA, PanCancer Atlas)	TCGA-VQ-A8P2-01	STAD	Esophagogastric Adenocarcinoma	Mucinous Stomach Adenocarcinoma	R226W		OncoKB: NA;CIViC: NA;MyCancerGenome: not present;CancerHotspot: no;3DHotspot: no	MutationAssessor: NA;SIFT: NA;Polyphen-2: NA	MutationAssessor: NA	SIFT: NA	Polyphen-2: NA		Missense_Mutation	SNP	Diploid
PSMB10	Colorectal Adenocarcinoma (TCGA, PanCancer Atlas)	TCGA-F5-6814-01	READ	Colorectal Adenocarcinoma	Rectal Adenocarcinoma	E15D		OncoKB: NA;CIViC: NA;MyCancerGenome: not present;CancerHotspot: no;3DHotspot: no	MutationAssessor: NA;SIFT: NA;Polyphen-2: NA	MutationAssessor: NA	SIFT: NA	Polyphen-2: NA		Missense_Mutation	SNP	ShallowDel
PSMB10	Head and Neck Squamous Cell Carcinoma (TCGA, PanCancer Atlas)	TCGA-CV-5440-01	HNSC	Head and Neck Squamous Cell Carcinoma	Head and Neck Squamous Cell Carcinoma	L177P		OncoKB: NA;CIViC: NA;MyCancerGenome: not present;CancerHotspot: no;3DHotspot: no	MutationAssessor: NA;SIFT: NA;Polyphen-2: NA	MutationAssessor: NA	SIFT: NA	Polyphen-2: NA		Missense_Mutation	SNP	Diploid
PSMB10	Head and Neck Squamous Cell Carcinoma (TCGA, PanCancer Atlas)	TCGA-CR-6481-01	HNSC	Head and Neck Squamous Cell Carcinoma	Head and Neck Squamous Cell Carcinoma	E178K		OncoKB: NA;CIViC: NA;MyCancerGenome: not present;CancerHotspot: no;3DHotspot: no	MutationAssessor: NA;SIFT: NA;Polyphen-2: NA	MutationAssessor: NA	SIFT: NA	Polyphen-2: NA		Missense_Mutation	SNP	ShallowDel
PSMB10	Cervical Squamous Cell Carcinoma (TCGA, PanCancer Atlas)	TCGA-Q1-A73O-01	CESC	Cervical Squamous Cell Carcinoma	Cervical Squamous Cell Carcinoma	E15D		OncoKB: NA;CIViC: NA;MyCancerGenome: not present;CancerHotspot: no;3DHotspot: no	MutationAssessor: NA;SIFT: NA;Polyphen-2: NA	MutationAssessor: NA	SIFT: NA	Polyphen-2: NA		Missense_Mutation	SNP	Diploid
PSMB10	Cervical Squamous Cell Carcinoma (TCGA, PanCancer Atlas)	TCGA-C5-A7CL-01	CESC	Cervical Squamous Cell Carcinoma	Cervical Squamous Cell Carcinoma	E7Gfs*51		OncoKB: NA;CIViC: NA;MyCancerGenome: not present;CancerHotspot: no;3DHotspot: no	MutationAssessor: NA;SIFT: NA;Polyphen-2: NA	MutationAssessor: NA	SIFT: NA	Polyphen-2: NA		Frame_Shift_Del	DEL	Diploid
PSMB10	Cervical Squamous Cell Carcinoma (TCGA, PanCancer Atlas)	TCGA-Q1-A73O-01	CESC	Cervical Squamous Cell Carcinoma	Cervical Squamous Cell Carcinoma	E112K		OncoKB: NA;CIViC: NA;MyCancerGenome: not present;CancerHotspot: no;3DHotspot: no	MutationAssessor: NA;SIFT: NA;Polyphen-2: NA	MutationAssessor: NA	SIFT: NA	Polyphen-2: NA		Missense_Mutation	SNP	Diploid
PSMB11	Breast Invasive Carcinoma (TCGA, PanCancer Atlas)	TCGA-A7-A3J1-01	BRCA	Invasive Breast Carcinoma	Breast Invasive Lobular Carcinoma	ABHD4-PSMB11		OncoKB: Unknown, level NA, resistance NA;CIViC: NA;MyCancerGenome: not present;CancerHotspot: no;3DHotspot: no	MutationAssessor: NA;SIFT: NA;Polyphen-2: NA	MutationAssessor: NA	SIFT: NA	Polyphen-2: NA		fusion	FUSION	Diploid
PSMB11	Brain Lower Grade Glioma (TCGA, PanCancer Atlas)	TCGA-DU-6392-01	LGG	Diffuse Glioma	Astrocytoma	R106W		OncoKB: NA;CIViC: NA;MyCancerGenome: not present;CancerHotspot: no;3DHotspot: no	MutationAssessor: NA;SIFT: NA;Polyphen-2: NA	MutationAssessor: NA	SIFT: NA	Polyphen-2: NA		Missense_Mutation	SNP	Diploid
PSMB11	Ovarian Serous Cystadenocarcinoma (TCGA, PanCancer Atlas)	TCGA-24-1426-01	OV	Ovarian Epithelial Tumor	Serous Ovarian Cancer	W153*		OncoKB: NA;CIViC: NA;MyCancerGenome: not present;CancerHotspot: no;3DHotspot: no	MutationAssessor: NA;SIFT: NA;Polyphen-2: NA	MutationAssessor: NA	SIFT: NA	Polyphen-2: NA		Nonsense_Mutation	SNP	Diploid
PSMB11	Glioblastoma Multiforme (TCGA, PanCancer Atlas)	TCGA-06-0744-01	GBM	Glioblastoma	Glioblastoma Multiforme	A128T		OncoKB: NA;CIViC: NA;MyCancerGenome: not present;CancerHotspot: no;3DHotspot: no	MutationAssessor: NA;SIFT: NA;Polyphen-2: NA	MutationAssessor: NA	SIFT: NA	Polyphen-2: NA		Missense_Mutation	SNP	Diploid
PSMB11	Glioblastoma Multiforme (TCGA, PanCancer Atlas)	TCGA-06-5416-01	GBM	Glioblastoma	Glioblastoma Multiforme	G96D		OncoKB: NA;CIViC: NA;MyCancerGenome: not present;CancerHotspot: no;3DHotspot: no	MutationAssessor: NA;SIFT: NA;Polyphen-2: NA	MutationAssessor: NA	SIFT: NA	Polyphen-2: NA		Missense_Mutation	SNP	ShallowDel
PSMB11	Glioblastoma Multiforme (TCGA, PanCancer Atlas)	TCGA-19-5956-01	GBM	Glioblastoma	Glioblastoma Multiforme	H235Y		OncoKB: NA;CIViC: NA;MyCancerGenome: not present;CancerHotspot: no;3DHotspot: no	MutationAssessor: NA;SIFT: NA;Polyphen-2: NA	MutationAssessor: NA	SIFT: NA	Polyphen-2: NA		Missense_Mutation	SNP	ShallowDel
PSMB11	Sarcoma (TCGA, PanCancer Atlas)	TCGA-IE-A4EH-01	SARC	Sarcoma	Leiomyosarcoma	T299M		OncoKB: NA;CIViC: NA;MyCancerGenome: not present;CancerHotspot: no;3DHotspot: no	MutationAssessor: NA;SIFT: NA;Polyphen-2: NA	MutationAssessor: NA	SIFT: NA	Polyphen-2: NA		Missense_Mutation	SNP	Diploid
PSMB11	Lung Squamous Cell Carcinoma (TCGA, PanCancer Atlas)	TCGA-39-5028-01	LUSC	Non-Small Cell Lung Cancer	Lung Squamous Cell Carcinoma	Y192F		OncoKB: NA;CIViC: NA;MyCancerGenome: not present;CancerHotspot: no;3DHotspot: no	MutationAssessor: NA;SIFT: NA;Polyphen-2: NA	MutationAssessor: NA	SIFT: NA	Polyphen-2: NA		Missense_Mutation	SNP	Diploid
PSMB11	Lung Squamous Cell Carcinoma (TCGA, PanCancer Atlas)	TCGA-77-7465-01	LUSC	Non-Small Cell Lung Cancer	Lung Squamous Cell Carcinoma	S98Y		OncoKB: NA;CIViC: NA;MyCancerGenome: not present;CancerHotspot: no;3DHotspot: no	MutationAssessor: NA;SIFT: NA;Polyphen-2: NA	MutationAssessor: NA	SIFT: NA	Polyphen-2: NA		Missense_Mutation	SNP	ShallowDel
PSMB11	Lung Squamous Cell Carcinoma (TCGA, PanCancer Atlas)	TCGA-90-A4ED-01	LUSC	Non-Small Cell Lung Cancer	Lung Squamous Cell Carcinoma	P158S		OncoKB: NA;CIViC: NA;MyCancerGenome: not present;CancerHotspot: no;3DHotspot: no	MutationAssessor: NA;SIFT: NA;Polyphen-2: NA	MutationAssessor: NA	SIFT: NA	Polyphen-2: NA		Missense_Mutation	SNP	ShallowDel
PSMB11	Bladder Urothelial Carcinoma (TCGA, PanCancer Atlas)	TCGA-FD-A6TG-01	BLCA	Bladder Urothelial Carcinoma	Bladder Urothelial Carcinoma	Q36*		OncoKB: NA;CIViC: NA;MyCancerGenome: not present;CancerHotspot: no;3DHotspot: no	MutationAssessor: NA;SIFT: NA;Polyphen-2: NA	MutationAssessor: NA	SIFT: NA	Polyphen-2: NA		Nonsense_Mutation	SNP	ShallowDel
PSMB11	Bladder Urothelial Carcinoma (TCGA, PanCancer Atlas)	TCGA-DK-A6AW-01	BLCA	Bladder Urothelial Carcinoma	Bladder Urothelial Carcinoma	R56H		OncoKB: NA;CIViC: NA;MyCancerGenome: not present;CancerHotspot: no;3DHotspot: no	MutationAssessor: NA;SIFT: NA;Polyphen-2: NA	MutationAssessor: NA	SIFT: NA	Polyphen-2: NA		Missense_Mutation	SNP	Diploid
PSMB11	Liver Hepatocellular Carcinoma (TCGA, PanCancer Atlas)	TCGA-DD-AAD0-01	LIHC	Hepatocellular Carcinoma	Hepatocellular Carcinoma	G220R		OncoKB: NA;CIViC: NA;MyCancerGenome: not present;CancerHotspot: no;3DHotspot: no	MutationAssessor: NA;SIFT: NA;Polyphen-2: NA	MutationAssessor: NA	SIFT: NA	Polyphen-2: NA		Missense_Mutation	SNP	Diploid
PSMB11	Liver Hepatocellular Carcinoma (TCGA, PanCancer Atlas)	TCGA-DD-AACO-01	LIHC	Hepatocellular Carcinoma	Hepatocellular Carcinoma	V209M		OncoKB: NA;CIViC: NA;MyCancerGenome: not present;CancerHotspot: no;3DHotspot: no	MutationAssessor: NA;SIFT: NA;Polyphen-2: NA	MutationAssessor: NA	SIFT: NA	Polyphen-2: NA		Missense_Mutation	SNP	Diploid
PSMB11	Liver Hepatocellular Carcinoma (TCGA, PanCancer Atlas)	TCGA-G3-AAV2-01	LIHC	Hepatocellular Carcinoma	Hepatocellular Carcinoma	D34Y		OncoKB: NA;CIViC: NA;MyCancerGenome: not present;CancerHotspot: no;3DHotspot: no	MutationAssessor: NA;SIFT: NA;Polyphen-2: NA	MutationAssessor: NA	SIFT: NA	Polyphen-2: NA		Missense_Mutation	SNP	Diploid
PSMB11	Prostate Adenocarcinoma (TCGA, PanCancer Atlas)	TCGA-XK-AAIW-01	PRAD	Prostate Adenocarcinoma	Prostate Adenocarcinoma	R238H		OncoKB: NA;CIViC: NA;MyCancerGenome: not present;CancerHotspot: no;3DHotspot: no	MutationAssessor: NA;SIFT: NA;Polyphen-2: NA	MutationAssessor: NA	SIFT: NA	Polyphen-2: NA		Missense_Mutation	SNP	Diploid
PSMB11	Prostate Adenocarcinoma (TCGA, PanCancer Atlas)	TCGA-WW-A8ZI-01	PRAD	Prostate Adenocarcinoma	Prostate Adenocarcinoma	S18T		OncoKB: NA;CIViC: NA;MyCancerGenome: not present;CancerHotspot: no;3DHotspot: no	MutationAssessor: NA;SIFT: NA;Polyphen-2: NA	MutationAssessor: NA	SIFT: NA	Polyphen-2: NA		Missense_Mutation	SNP	Diploid
PSMB11	Kidney Renal Clear Cell Carcinoma (TCGA, PanCancer Atlas)	TCGA-BP-5182-01	KIRC	Renal Clear Cell Carcinoma	Renal Clear Cell Carcinoma	R31Q		OncoKB: NA;CIViC: NA;MyCancerGenome: not present;CancerHotspot: no;3DHotspot: no	MutationAssessor: NA;SIFT: NA;Polyphen-2: NA	MutationAssessor: NA	SIFT: NA	Polyphen-2: NA		Missense_Mutation	SNP	Diploid
PSMB11	Kidney Renal Clear Cell Carcinoma (TCGA, PanCancer Atlas)	TCGA-B0-4815-01	KIRC	Renal Clear Cell Carcinoma	Renal Clear Cell Carcinoma	A47D		OncoKB: NA;CIViC: NA;MyCancerGenome: not present;CancerHotspot: no;3DHotspot: no	MutationAssessor: NA;SIFT: NA;Polyphen-2: NA	MutationAssessor: NA	SIFT: NA	Polyphen-2: NA		Missense_Mutation	SNP	Diploid
PSMB11	Uterine Corpus Endometrial Carcinoma (TCGA, PanCancer Atlas)	TCGA-A5-A1OF-01	UCEC	Endometrial Carcinoma	Uterine Mixed Endometrial Carcinoma	R113W		OncoKB: NA;CIViC: NA;MyCancerGenome: not present;CancerHotspot: no;3DHotspot: no	MutationAssessor: NA;SIFT: NA;Polyphen-2: NA	MutationAssessor: NA	SIFT: NA	Polyphen-2: NA		Missense_Mutation	SNP	Diploid
PSMB11	Uterine Corpus Endometrial Carcinoma (TCGA, PanCancer Atlas)	TCGA-AP-A054-01	UCEC	Endometrial Carcinoma	Uterine Endometrioid Carcinoma	R229Q		OncoKB: NA;CIViC: NA;MyCancerGenome: not present;CancerHotspot: no;3DHotspot: no	MutationAssessor: NA;SIFT: NA;Polyphen-2: NA	MutationAssessor: NA	SIFT: NA	Polyphen-2: NA		Missense_Mutation	SNP	Diploid
PSMB11	Uterine Corpus Endometrial Carcinoma (TCGA, PanCancer Atlas)	TCGA-AP-A056-01	UCEC	Endometrial Carcinoma	Uterine Endometrioid Carcinoma	D216Y		OncoKB: NA;CIViC: NA;MyCancerGenome: not present;CancerHotspot: no;3DHotspot: no	MutationAssessor: NA;SIFT: NA;Polyphen-2: NA	MutationAssessor: NA	SIFT: NA	Polyphen-2: NA		Missense_Mutation	SNP	Diploid
PSMB11	Uterine Corpus Endometrial Carcinoma (TCGA, PanCancer Atlas)	TCGA-AP-A0LM-01	UCEC	Endometrial Carcinoma	Uterine Endometrioid Carcinoma	A208T		OncoKB: NA;CIViC: NA;MyCancerGenome: not present;CancerHotspot: no;3DHotspot: no	MutationAssessor: NA;SIFT: NA;Polyphen-2: NA	MutationAssessor: NA	SIFT: NA	Polyphen-2: NA		Missense_Mutation	SNP	Diploid
PSMB11	Uterine Corpus Endometrial Carcinoma (TCGA, PanCancer Atlas)	TCGA-B5-A0JY-01	UCEC	Endometrial Carcinoma	Uterine Endometrioid Carcinoma	A208T		OncoKB: NA;CIViC: NA;MyCancerGenome: not present;CancerHotspot: no;3DHotspot: no	MutationAssessor: NA;SIFT: NA;Polyphen-2: NA	MutationAssessor: NA	SIFT: NA	Polyphen-2: NA		Missense_Mutation	SNP	Diploid
PSMB11	Uterine Corpus Endometrial Carcinoma (TCGA, PanCancer Atlas)	TCGA-AP-A1DR-01	UCEC	Endometrial Carcinoma	Uterine Endometrioid Carcinoma	R110Q		OncoKB: NA;CIViC: NA;MyCancerGenome: not present;CancerHotspot: no;3DHotspot: no	MutationAssessor: NA;SIFT: NA;Polyphen-2: NA	MutationAssessor: NA	SIFT: NA	Polyphen-2: NA		Missense_Mutation	SNP	Diploid
PSMB11	Uterine Corpus Endometrial Carcinoma (TCGA, PanCancer Atlas)	TCGA-AX-A1C9-01	UCEC	Endometrial Carcinoma	Uterine Endometrioid Carcinoma	V228M		OncoKB: NA;CIViC: NA;MyCancerGenome: not present;CancerHotspot: no;3DHotspot: no	MutationAssessor: NA;SIFT: NA;Polyphen-2: NA	MutationAssessor: NA	SIFT: NA	Polyphen-2: NA		Missense_Mutation	SNP	Diploid
PSMB11	Uterine Corpus Endometrial Carcinoma (TCGA, PanCancer Atlas)	TCGA-BG-A0VZ-01	UCEC	Endometrial Carcinoma	Uterine Endometrioid Carcinoma	A274T		OncoKB: NA;CIViC: NA;MyCancerGenome: not present;CancerHotspot: no;3DHotspot: no	MutationAssessor: NA;SIFT: NA;Polyphen-2: NA	MutationAssessor: NA	SIFT: NA	Polyphen-2: NA		Missense_Mutation	SNP	Diploid
PSMB11	Uterine Corpus Endometrial Carcinoma (TCGA, PanCancer Atlas)	TCGA-BS-A0UF-01	UCEC	Endometrial Carcinoma	Uterine Endometrioid Carcinoma	D100N		OncoKB: NA;CIViC: NA;MyCancerGenome: not present;CancerHotspot: no;3DHotspot: no	MutationAssessor: NA;SIFT: NA;Polyphen-2: NA	MutationAssessor: NA	SIFT: NA	Polyphen-2: NA		Missense_Mutation	SNP	Diploid
PSMB11	Uterine Corpus Endometrial Carcinoma (TCGA, PanCancer Atlas)	TCGA-A5-A0G2-01	UCEC	Endometrial Carcinoma	Uterine Serous Carcinoma/Uterine Papillary Serous Carcinoma	G96D		OncoKB: NA;CIViC: NA;MyCancerGenome: not present;CancerHotspot: no;3DHotspot: no	MutationAssessor: NA;SIFT: NA;Polyphen-2: NA	MutationAssessor: NA	SIFT: NA	Polyphen-2: NA		Missense_Mutation	SNP	Diploid
PSMB11	Uterine Corpus Endometrial Carcinoma (TCGA, PanCancer Atlas)	TCGA-BG-A222-01	UCEC	Endometrial Carcinoma	Uterine Endometrioid Carcinoma	D240N		OncoKB: NA;CIViC: NA;MyCancerGenome: not present;CancerHotspot: no;3DHotspot: no	MutationAssessor: NA;SIFT: NA;Polyphen-2: NA	MutationAssessor: NA	SIFT: NA	Polyphen-2: NA		Missense_Mutation	SNP	Diploid
PSMB11	Uterine Corpus Endometrial Carcinoma (TCGA, PanCancer Atlas)	TCGA-A5-A0G1-01	UCEC	Endometrial Carcinoma	Uterine Serous Carcinoma/Uterine Papillary Serous Carcinoma	A268T		OncoKB: NA;CIViC: NA;MyCancerGenome: not present;CancerHotspot: no;3DHotspot: no	MutationAssessor: NA;SIFT: NA;Polyphen-2: NA	MutationAssessor: NA	SIFT: NA	Polyphen-2: NA		Missense_Mutation	SNP	Diploid
PSMB11	Uterine Corpus Endometrial Carcinoma (TCGA, PanCancer Atlas)	TCGA-A5-A0G1-01	UCEC	Endometrial Carcinoma	Uterine Serous Carcinoma/Uterine Papillary Serous Carcinoma	A270S		OncoKB: NA;CIViC: NA;MyCancerGenome: not present;CancerHotspot: no;3DHotspot: no	MutationAssessor: NA;SIFT: NA;Polyphen-2: NA	MutationAssessor: NA	SIFT: NA	Polyphen-2: NA		Missense_Mutation	SNP	Diploid
PSMB11	Uterine Corpus Endometrial Carcinoma (TCGA, PanCancer Atlas)	TCGA-A5-A0G1-01	UCEC	Endometrial Carcinoma	Uterine Serous Carcinoma/Uterine Papillary Serous Carcinoma	E275D		OncoKB: NA;CIViC: NA;MyCancerGenome: not present;CancerHotspot: no;3DHotspot: no	MutationAssessor: NA;SIFT: NA;Polyphen-2: NA	MutationAssessor: NA	SIFT: NA	Polyphen-2: NA		Missense_Mutation	SNP	Diploid
PSMB11	Uterine Corpus Endometrial Carcinoma (TCGA, PanCancer Atlas)	TCGA-A5-A0G2-01	UCEC	Endometrial Carcinoma	Uterine Serous Carcinoma/Uterine Papillary Serous Carcinoma	P182T		OncoKB: NA;CIViC: NA;MyCancerGenome: not present;CancerHotspot: no;3DHotspot: no	MutationAssessor: NA;SIFT: NA;Polyphen-2: NA	MutationAssessor: NA	SIFT: NA	Polyphen-2: NA		Missense_Mutation	SNP	Diploid
PSMB11	Uterine Corpus Endometrial Carcinoma (TCGA, PanCancer Atlas)	TCGA-A5-A0G2-01	UCEC	Endometrial Carcinoma	Uterine Serous Carcinoma/Uterine Papillary Serous Carcinoma	P182H		OncoKB: NA;CIViC: NA;MyCancerGenome: not present;CancerHotspot: no;3DHotspot: no	MutationAssessor: NA;SIFT: NA;Polyphen-2: NA	MutationAssessor: NA	SIFT: NA	Polyphen-2: NA		Missense_Mutation	SNP	Diploid
PSMB11	Uterine Corpus Endometrial Carcinoma (TCGA, PanCancer Atlas)	TCGA-A5-A1OF-01	UCEC	Endometrial Carcinoma	Uterine Mixed Endometrial Carcinoma	E278G		OncoKB: NA;CIViC: NA;MyCancerGenome: not present;CancerHotspot: no;3DHotspot: no	MutationAssessor: NA;SIFT: NA;Polyphen-2: NA	MutationAssessor: NA	SIFT: NA	Polyphen-2: NA		Missense_Mutation	SNP	Diploid
PSMB11	Uterine Corpus Endometrial Carcinoma (TCGA, PanCancer Atlas)	TCGA-AP-A1DM-01	UCEC	Endometrial Carcinoma	Uterine Endometrioid Carcinoma	I84T		OncoKB: NA;CIViC: NA;MyCancerGenome: not present;CancerHotspot: no;3DHotspot: no	MutationAssessor: NA;SIFT: NA;Polyphen-2: NA	MutationAssessor: NA	SIFT: NA	Polyphen-2: NA		Missense_Mutation	SNP	Diploid
PSMB11	Uterine Corpus Endometrial Carcinoma (TCGA, PanCancer Atlas)	TCGA-AX-A2HC-01	UCEC	Endometrial Carcinoma	Uterine Endometrioid Carcinoma	D224Y		OncoKB: NA;CIViC: NA;MyCancerGenome: not present;CancerHotspot: no;3DHotspot: no	MutationAssessor: NA;SIFT: NA;Polyphen-2: NA	MutationAssessor: NA	SIFT: NA	Polyphen-2: NA		Missense_Mutation	SNP	Diploid
PSMB11	Uterine Corpus Endometrial Carcinoma (TCGA, PanCancer Atlas)	TCGA-AX-A2HD-01	UCEC	Endometrial Carcinoma	Uterine Endometrioid Carcinoma	A79T		OncoKB: NA;CIViC: NA;MyCancerGenome: not present;CancerHotspot: no;3DHotspot: no	MutationAssessor: NA;SIFT: NA;Polyphen-2: NA	MutationAssessor: NA	SIFT: NA	Polyphen-2: NA		Missense_Mutation	SNP	Diploid
PSMB11	Uterine Corpus Endometrial Carcinoma (TCGA, PanCancer Atlas)	TCGA-EO-A22R-01	UCEC	Endometrial Carcinoma	Uterine Endometrioid Carcinoma	R215H		OncoKB: NA;CIViC: NA;MyCancerGenome: not present;CancerHotspot: no;3DHotspot: no	MutationAssessor: NA;SIFT: NA;Polyphen-2: NA	MutationAssessor: NA	SIFT: NA	Polyphen-2: NA		Missense_Mutation	SNP	Diploid
PSMB11	Uterine Corpus Endometrial Carcinoma (TCGA, PanCancer Atlas)	TCGA-QS-A5YR-01	UCEC	Endometrial Carcinoma	Uterine Endometrioid Carcinoma	W9Vfs*5		OncoKB: NA;CIViC: NA;MyCancerGenome: not present;CancerHotspot: no;3DHotspot: no	MutationAssessor: NA;SIFT: NA;Polyphen-2: NA	MutationAssessor: NA	SIFT: NA	Polyphen-2: NA		Frame_Shift_Ins	INS	Diploid
PSMB11	Lung Adenocarcinoma (TCGA, PanCancer Atlas)	TCGA-55-7994-01	LUAD	Non-Small Cell Lung Cancer	Lung Adenocarcinoma	P35L		OncoKB: NA;CIViC: NA;MyCancerGenome: not present;CancerHotspot: no;3DHotspot: no	MutationAssessor: NA;SIFT: NA;Polyphen-2: NA	MutationAssessor: NA	SIFT: NA	Polyphen-2: NA		Missense_Mutation	SNP	Gain
PSMB11	Lung Adenocarcinoma (TCGA, PanCancer Atlas)	TCGA-75-5125-01	LUAD	Non-Small Cell Lung Cancer	Lung Adenocarcinoma	C151*		OncoKB: NA;CIViC: NA;MyCancerGenome: not present;CancerHotspot: no;3DHotspot: no	MutationAssessor: NA;SIFT: NA;Polyphen-2: NA	MutationAssessor: NA	SIFT: NA	Polyphen-2: NA		Nonsense_Mutation	SNP	ShallowDel
PSMB11	Lung Adenocarcinoma (TCGA, PanCancer Atlas)	TCGA-86-8279-01	LUAD	Non-Small Cell Lung Cancer	Lung Adenocarcinoma	H235L		OncoKB: NA;CIViC: NA;MyCancerGenome: not present;CancerHotspot: no;3DHotspot: no	MutationAssessor: NA;SIFT: NA;Polyphen-2: NA	MutationAssessor: NA	SIFT: NA	Polyphen-2: NA		Missense_Mutation	SNP	Diploid
PSMB11	Lung Adenocarcinoma (TCGA, PanCancer Atlas)	TCGA-97-8179-01	LUAD	Non-Small Cell Lung Cancer	Lung Adenocarcinoma	G16V		OncoKB: NA;CIViC: NA;MyCancerGenome: not present;CancerHotspot: no;3DHotspot: no	MutationAssessor: NA;SIFT: NA;Polyphen-2: NA	MutationAssessor: NA	SIFT: NA	Polyphen-2: NA		Missense_Mutation	SNP	Gain
PSMB11	Lung Adenocarcinoma (TCGA, PanCancer Atlas)	TCGA-NJ-A55R-01	LUAD	Non-Small Cell Lung Cancer	Lung Adenocarcinoma	H271Y		OncoKB: NA;CIViC: NA;MyCancerGenome: not present;CancerHotspot: no;3DHotspot: no	MutationAssessor: NA;SIFT: NA;Polyphen-2: NA	MutationAssessor: NA	SIFT: NA	Polyphen-2: NA		Missense_Mutation	SNP	Gain
PSMB11	Lung Adenocarcinoma (TCGA, PanCancer Atlas)	TCGA-44-7662-01	LUAD	Non-Small Cell Lung Cancer	Lung Adenocarcinoma	W27S		OncoKB: NA;CIViC: NA;MyCancerGenome: not present;CancerHotspot: no;3DHotspot: no	MutationAssessor: NA;SIFT: NA;Polyphen-2: NA	MutationAssessor: NA	SIFT: NA	Polyphen-2: NA		Missense_Mutation	SNP	Gain
PSMB11	Lung Adenocarcinoma (TCGA, PanCancer Atlas)	TCGA-44-7662-01	LUAD	Non-Small Cell Lung Cancer	Lung Adenocarcinoma	W27C		OncoKB: NA;CIViC: NA;MyCancerGenome: not present;CancerHotspot: no;3DHotspot: no	MutationAssessor: NA;SIFT: NA;Polyphen-2: NA	MutationAssessor: NA	SIFT: NA	Polyphen-2: NA		Missense_Mutation	SNP	Gain
PSMB11	Skin Cutaneous Melanoma (TCGA, PanCancer Atlas)	TCGA-EE-A2MJ-06	SKCM	Melanoma	Cutaneous Melanoma	G141R		OncoKB: NA;CIViC: NA;MyCancerGenome: not present;CancerHotspot: no;3DHotspot: no	MutationAssessor: NA;SIFT: NA;Polyphen-2: NA	MutationAssessor: NA	SIFT: NA	Polyphen-2: NA		Missense_Mutation	SNP	Gain
PSMB11	Skin Cutaneous Melanoma (TCGA, PanCancer Atlas)	TCGA-FR-A726-01	SKCM	Melanoma	Cutaneous Melanoma	G141R		OncoKB: NA;CIViC: NA;MyCancerGenome: not present;CancerHotspot: no;3DHotspot: no	MutationAssessor: NA;SIFT: NA;Polyphen-2: NA	MutationAssessor: NA	SIFT: NA	Polyphen-2: NA		Missense_Mutation	SNP
PSMB11	Skin Cutaneous Melanoma (TCGA, PanCancer Atlas)	TCGA-EE-A3AE-06	SKCM	Melanoma	Cutaneous Melanoma	D195N		OncoKB: NA;CIViC: NA;MyCancerGenome: not present;CancerHotspot: no;3DHotspot: no	MutationAssessor: NA;SIFT: NA;Polyphen-2: NA	MutationAssessor: NA	SIFT: NA	Polyphen-2: NA		Missense_Mutation	SNP	Gain
PSMB11	Skin Cutaneous Melanoma (TCGA, PanCancer Atlas)	TCGA-EB-A6QY-01	SKCM	Melanoma	Cutaneous Melanoma	G16E		OncoKB: NA;CIViC: NA;MyCancerGenome: not present;CancerHotspot: no;3DHotspot: no	MutationAssessor: NA;SIFT: NA;Polyphen-2: NA	MutationAssessor: NA	SIFT: impact: tolerated, score: 0.63	Polyphen-2: impact: benign	0	Missense_Mutation	SNP
PSMB11	Skin Cutaneous Melanoma (TCGA, PanCancer Atlas)	TCGA-EE-A182-06	SKCM	Melanoma	Cutaneous Melanoma	R155C		OncoKB: NA;CIViC: NA;MyCancerGenome: not present;CancerHotspot: no;3DHotspot: no	MutationAssessor: NA;SIFT: NA;Polyphen-2: NA	MutationAssessor: NA	SIFT: impact: tolerated, score: 0.06	Polyphen-2: impact: probably_damaging	1	Missense_Mutation	SNP	Diploid
PSMB11	Skin Cutaneous Melanoma (TCGA, PanCancer Atlas)	TCGA-HR-A2OH-06	SKCM	Melanoma	Cutaneous Melanoma	E200K		OncoKB: NA;CIViC: NA;MyCancerGenome: not present;CancerHotspot: no;3DHotspot: no	MutationAssessor: NA;SIFT: NA;Polyphen-2: NA	MutationAssessor: NA	SIFT: NA	Polyphen-2: NA		Missense_Mutation	SNP	Diploid
PSMB11	Skin Cutaneous Melanoma (TCGA, PanCancer Atlas)	TCGA-W3-AA1O-06	SKCM	Melanoma	Cutaneous Melanoma	G16R		OncoKB: NA;CIViC: NA;MyCancerGenome: not present;CancerHotspot: no;3DHotspot: no	MutationAssessor: NA;SIFT: NA;Polyphen-2: NA	MutationAssessor: NA	SIFT: impact: tolerated, score: 0.9	Polyphen-2: impact: probably_damaging	0.96	Missense_Mutation	SNP	Gain
PSMB11	Skin Cutaneous Melanoma (TCGA, PanCancer Atlas)	TCGA-BF-AAP0-06	SKCM	Melanoma	Cutaneous Melanoma	G232R		OncoKB: NA;CIViC: NA;MyCancerGenome: not present;CancerHotspot: no;3DHotspot: no	MutationAssessor: NA;SIFT: NA;Polyphen-2: NA	MutationAssessor: NA	SIFT: NA	Polyphen-2: NA		Missense_Mutation	SNP	Diploid
PSMB11	Skin Cutaneous Melanoma (TCGA, PanCancer Atlas)	TCGA-FR-A8YC-06	SKCM	Melanoma	Cutaneous Melanoma	D166N		OncoKB: NA;CIViC: NA;MyCancerGenome: not present;CancerHotspot: no;3DHotspot: no	MutationAssessor: NA;SIFT: NA;Polyphen-2: NA	MutationAssessor: NA	SIFT: NA	Polyphen-2: NA		Missense_Mutation	SNP	ShallowDel
PSMB11	Stomach Adenocarcinoma (TCGA, PanCancer Atlas)	TCGA-BR-8487-01	STAD	Esophagogastric Adenocarcinoma	Stomach Adenocarcinoma	R68C		OncoKB: NA;CIViC: NA;MyCancerGenome: not present;CancerHotspot: no;3DHotspot: no	MutationAssessor: NA;SIFT: NA;Polyphen-2: NA	MutationAssessor: NA	SIFT: impact: deleterious, score: 0	Polyphen-2: impact: probably_damaging	0.99	Missense_Mutation	SNP	Diploid
PSMB11	Stomach Adenocarcinoma (TCGA, PanCancer Atlas)	TCGA-BR-8680-01	STAD	Esophagogastric Adenocarcinoma	Tubular Stomach Adenocarcinoma	L244M		OncoKB: NA;CIViC: NA;MyCancerGenome: not present;CancerHotspot: no;3DHotspot: no	MutationAssessor: NA;SIFT: NA;Polyphen-2: NA	MutationAssessor: NA	SIFT: impact: deleterious, score: 0	Polyphen-2: impact: probably_damaging	1	Missense_Mutation	SNP	Diploid
PSMB11	Stomach Adenocarcinoma (TCGA, PanCancer Atlas)	TCGA-D7-A6EY-01	STAD	Esophagogastric Adenocarcinoma	Tubular Stomach Adenocarcinoma	V107A		OncoKB: NA;CIViC: NA;MyCancerGenome: not present;CancerHotspot: no;3DHotspot: no	MutationAssessor: NA;SIFT: NA;Polyphen-2: NA	MutationAssessor: NA	SIFT: impact: tolerated, score: 0.33	Polyphen-2: impact: possibly_damaging	0.88	Missense_Mutation	SNP	Diploid
PSMB11	Stomach Adenocarcinoma (TCGA, PanCancer Atlas)	TCGA-KB-A93G-01	STAD	Undifferentiated Stomach Adenocarcinoma	Signet Ring Cell Carcinoma of the Stomach	R110W		OncoKB: NA;CIViC: NA;MyCancerGenome: not present;CancerHotspot: no;3DHotspot: no	MutationAssessor: NA;SIFT: NA;Polyphen-2: NA	MutationAssessor: NA	SIFT: impact: deleterious, score: 0	Polyphen-2: impact: possibly_damaging	0.82	Missense_Mutation	SNP	Diploid
PSMB11	Stomach Adenocarcinoma (TCGA, PanCancer Atlas)	TCGA-RD-A7BT-01	STAD	Esophagogastric Adenocarcinoma	Intestinal Type Stomach Adenocarcinoma	D5E		OncoKB: NA;CIViC: NA;MyCancerGenome: not present;CancerHotspot: no;3DHotspot: no	MutationAssessor: NA;SIFT: NA;Polyphen-2: NA	MutationAssessor: NA	SIFT: impact: deleterious, score: 0	Polyphen-2: impact: benign	0.34	Missense_Mutation	SNP	Diploid
PSMB11	Breast Invasive Carcinoma (TCGA, PanCancer Atlas)	TCGA-LL-A6FQ-01	BRCA	Invasive Breast Carcinoma	Breast Invasive Ductal Carcinoma	R229Q		OncoKB: NA;CIViC: NA;MyCancerGenome: not present;CancerHotspot: no;3DHotspot: no	MutationAssessor: NA;SIFT: NA;Polyphen-2: NA	MutationAssessor: NA	SIFT: impact: tolerated, score: 0.08	Polyphen-2: impact: benign	0.16	Missense_Mutation	SNP	Gain
PSMB11	Breast Invasive Carcinoma (TCGA, PanCancer Atlas)	TCGA-A8-A094-01	BRCA	Invasive Breast Carcinoma	Breast Invasive Ductal Carcinoma	V228M		OncoKB: NA;CIViC: NA;MyCancerGenome: not present;CancerHotspot: no;3DHotspot: no	MutationAssessor: NA;SIFT: NA;Polyphen-2: NA	MutationAssessor: NA	SIFT: impact: tolerated, score: 0.35	Polyphen-2: impact: possibly_damaging	0.52	Missense_Mutation	SNP	Diploid
PSMB11	Breast Invasive Carcinoma (TCGA, PanCancer Atlas)	TCGA-GM-A3XL-01	BRCA	Invasive Breast Carcinoma	Breast Invasive Ductal Carcinoma	V187M		OncoKB: NA;CIViC: NA;MyCancerGenome: not present;CancerHotspot: no;3DHotspot: no	MutationAssessor: NA;SIFT: NA;Polyphen-2: NA	MutationAssessor: NA	SIFT: impact: deleterious, score: 0.04	Polyphen-2: impact: possibly_damaging	0.63	Missense_Mutation	SNP	ShallowDel
PSMB11	Colorectal Adenocarcinoma (TCGA, PanCancer Atlas)	TCGA-DC-6160-01	READ	Colorectal Adenocarcinoma	Rectal Adenocarcinoma	R206C		OncoKB: NA;CIViC: NA;MyCancerGenome: not present;CancerHotspot: no;3DHotspot: no	MutationAssessor: NA;SIFT: NA;Polyphen-2: NA	MutationAssessor: NA	SIFT: impact: tolerated, score: 0.46	Polyphen-2: impact: benign	0.02	Missense_Mutation	SNP	Diploid
PSMB11	Colorectal Adenocarcinoma (TCGA, PanCancer Atlas)	TCGA-CK-4951-01	COAD	Colorectal Adenocarcinoma	Mucinous Adenocarcinoma of the Colon and Rectum	R58H		OncoKB: NA;CIViC: NA;MyCancerGenome: not present;CancerHotspot: no;3DHotspot: no	MutationAssessor: NA;SIFT: NA;Polyphen-2: NA	MutationAssessor: NA	SIFT: impact: tolerated, score: 1	Polyphen-2: impact: probably_damaging	0.99	Missense_Mutation	SNP	Diploid
PSMB11	Colorectal Adenocarcinoma (TCGA, PanCancer Atlas)	TCGA-AA-3663-01	COAD	Colorectal Adenocarcinoma	Colon Adenocarcinoma	K250R		OncoKB: NA;CIViC: NA;MyCancerGenome: not present;CancerHotspot: no;3DHotspot: no	MutationAssessor: NA;SIFT: NA;Polyphen-2: NA	MutationAssessor: NA	SIFT: impact: deleterious, score: 0	Polyphen-2: impact: probably_damaging	0.93	Missense_Mutation	SNP	Diploid
PSMB11	Colorectal Adenocarcinoma (TCGA, PanCancer Atlas)	TCGA-AA-3715-01	COAD	Colorectal Adenocarcinoma	Colon Adenocarcinoma	Y194H		OncoKB: NA;CIViC: NA;MyCancerGenome: not present;CancerHotspot: no;3DHotspot: no	MutationAssessor: NA;SIFT: NA;Polyphen-2: NA	MutationAssessor: NA	SIFT: impact: deleterious, score: 0.02	Polyphen-2: impact: probably_damaging	0.98	Missense_Mutation	SNP	Diploid
PSMB11	Colorectal Adenocarcinoma (TCGA, PanCancer Atlas)	TCGA-CK-4951-01	COAD	Colorectal Adenocarcinoma	Mucinous Adenocarcinoma of the Colon and Rectum	H59Y		OncoKB: NA;CIViC: NA;MyCancerGenome: not present;CancerHotspot: no;3DHotspot: no	MutationAssessor: NA;SIFT: NA;Polyphen-2: NA	MutationAssessor: NA	SIFT: NA	Polyphen-2: NA		Missense_Mutation	SNP	Diploid
PSMB11	Colorectal Adenocarcinoma (TCGA, PanCancer Atlas)	TCGA-DM-A28A-01	COAD	Colorectal Adenocarcinoma	Colon Adenocarcinoma	H42R		OncoKB: NA;CIViC: NA;MyCancerGenome: not present;CancerHotspot: no;3DHotspot: no	MutationAssessor: NA;SIFT: NA;Polyphen-2: NA	MutationAssessor: NA	SIFT: impact: deleterious, score: 0	Polyphen-2: impact: possibly_damaging	0.81	Missense_Mutation	SNP	Diploid
PSMB11	Kidney Renal Papillary Cell Carcinoma (TCGA, PanCancer Atlas)	TCGA-G7-A8LB-01	KIRP	Renal Non-Clear Cell Carcinoma	Papillary Renal Cell Carcinoma	R113W		OncoKB: NA;CIViC: NA;MyCancerGenome: not present;CancerHotspot: no;3DHotspot: no	MutationAssessor: NA;SIFT: NA;Polyphen-2: NA	MutationAssessor: NA	SIFT: impact: deleterious, score: 0	Polyphen-2: impact: probably_damaging	1	Missense_Mutation	SNP	Diploid
PSMB11	Head and Neck Squamous Cell Carcinoma (TCGA, PanCancer Atlas)	TCGA-CV-7245-01	HNSC	Head and Neck Squamous Cell Carcinoma	Head and Neck Squamous Cell Carcinoma	A203V		OncoKB: NA;CIViC: NA;MyCancerGenome: not present;CancerHotspot: no;3DHotspot: no	MutationAssessor: NA;SIFT: NA;Polyphen-2: NA	MutationAssessor: NA	SIFT: impact: deleterious, score: 0	Polyphen-2: impact: possibly_damaging	0.74	Missense_Mutation	SNP	Gain
PSMB11	Cervical Squamous Cell Carcinoma (TCGA, PanCancer Atlas)	TCGA-JW-A5VJ-01	CESC	Cervical Squamous Cell Carcinoma	Cervical Squamous Cell Carcinoma	H20Y		OncoKB: NA;CIViC: NA;MyCancerGenome: not present;CancerHotspot: no;3DHotspot: no	MutationAssessor: NA;SIFT: NA;Polyphen-2: NA	MutationAssessor: NA	SIFT: NA	Polyphen-2: NA		Missense_Mutation	SNP	Diploid
PSMB11	Cervical Squamous Cell Carcinoma (TCGA, PanCancer Atlas)	TCGA-2W-A8YY-01	CESC	Cervical Squamous Cell Carcinoma	Cervical Squamous Cell Carcinoma	R193H		OncoKB: NA;CIViC: NA;MyCancerGenome: not present;CancerHotspot: no;3DHotspot: no	MutationAssessor: NA;SIFT: NA;Polyphen-2: NA	MutationAssessor: NA	SIFT: impact: deleterious, score: 0	Polyphen-2: impact: benign	0.1	Missense_Mutation	SNP	Diploid
PSMB1	Prostate Adenocarcinoma (TCGA, PanCancer Atlas)	TCGA-EJ-7321-01	PRAD	Prostate Adenocarcinoma	Prostate Adenocarcinoma	ANKRD11-PSMB1		OncoKB: Likely Oncogenic, level NA, resistance NA;CIViC: NA;MyCancerGenome: not present;CancerHotspot: no;3DHotspot: no	MutationAssessor: NA;SIFT: NA;Polyphen-2: NA	MutationAssessor: NA	SIFT: impact: deleterious, score: 0.01	Polyphen-2: impact: probably_damaging	0.97	fusion	FUSION	Diploid
PSMB1	Sarcoma (TCGA, PanCancer Atlas)	TCGA-MB-A5YA-01	SARC	Sarcoma	Leiomyosarcoma	UBR5-PSMB1		OncoKB: Unknown, level NA, resistance NA;CIViC: NA;MyCancerGenome: not present;CancerHotspot: no;3DHotspot: no	MutationAssessor: NA;SIFT: NA;Polyphen-2: NA	MutationAssessor: NA	SIFT: NA	Polyphen-2: NA		fusion	FUSION	Diploid
PSMB1	Uterine Carcinosarcoma (TCGA, PanCancer Atlas)	TCGA-N7-A4Y0-01	UCS	Endometrial Carcinoma	Uterine Carcinosarcoma/Uterine Malignant Mixed Mullerian Tumor	R201Q		OncoKB: NA;CIViC: NA;MyCancerGenome: not present;CancerHotspot: no;3DHotspot: no	MutationAssessor: NA;SIFT: impact: tolerated, score: 0.63;Polyphen-2: impact: benign, score: 0	MutationAssessor: NA	SIFT: impact: deleterious, score: 0	Polyphen-2: impact: probably_damaging	1	Missense_Mutation	SNP	Gain
PSMB1	Adrenocortical Carcinoma (TCGA, PanCancer Atlas)	TCGA-PK-A5HB-01	ACC	Adrenocortical Carcinoma	Adrenocortical Carcinoma	P154S		OncoKB: NA;CIViC: NA;MyCancerGenome: not present;CancerHotspot: no;3DHotspot: no	MutationAssessor: NA;SIFT: impact: tolerated, score: 0.06;Polyphen-2: impact: probably_damaging, score: 1	MutationAssessor: NA	SIFT: impact: tolerated, score: 0.28	Polyphen-2: impact: benign	0.01	Missense_Mutation	SNP	Diploid
PSMB1	Adrenocortical Carcinoma (TCGA, PanCancer Atlas)	TCGA-PK-A5HB-01	ACC	Adrenocortical Carcinoma	Adrenocortical Carcinoma	L15F		OncoKB: NA;CIViC: NA;MyCancerGenome: not present;CancerHotspot: no;3DHotspot: no	MutationAssessor: NA;SIFT: NA;Polyphen-2: NA	MutationAssessor: NA	SIFT: NA	Polyphen-2: NA		Missense_Mutation	SNP	Diploid
PSMB1	Brain Lower Grade Glioma (TCGA, PanCancer Atlas)	TCGA-S9-A6UA-01	LGG	Diffuse Glioma	Astrocytoma	G114E		OncoKB: NA;CIViC: NA;MyCancerGenome: not present;CancerHotspot: no;3DHotspot: no	MutationAssessor: NA;SIFT: impact: tolerated, score: 0.9;Polyphen-2: impact: probably_damaging, score: 0.963	MutationAssessor: NA	SIFT: NA	Polyphen-2: NA		Missense_Mutation	SNP	Diploid
PSMB1	Glioblastoma Multiforme (TCGA, PanCancer Atlas)	TCGA-06-5416-01	GBM	Glioblastoma	Glioblastoma Multiforme	L74*		OncoKB: NA;CIViC: NA;MyCancerGenome: not present;CancerHotspot: no;3DHotspot: no	MutationAssessor: NA;SIFT: NA;Polyphen-2: NA	MutationAssessor: NA	SIFT: NA	Polyphen-2: NA		Nonsense_Mutation	SNP	ShallowDel
PSMB1	Bladder Urothelial Carcinoma (TCGA, PanCancer Atlas)	TCGA-FJ-A3ZE-01	BLCA	Bladder Urothelial Carcinoma	Bladder Urothelial Carcinoma	D14H		OncoKB: NA;CIViC: NA;MyCancerGenome: not present;CancerHotspot: no;3DHotspot: no	MutationAssessor: NA;SIFT: NA;Polyphen-2: NA	MutationAssessor: NA	SIFT: NA	Polyphen-2: NA		Missense_Mutation	SNP	Gain
PSMB1	Uterine Corpus Endometrial Carcinoma (TCGA, PanCancer Atlas)	TCGA-B5-A0JY-01	UCEC	Endometrial Carcinoma	Uterine Endometrioid Carcinoma	N107T		OncoKB: NA;CIViC: NA;MyCancerGenome: not present;CancerHotspot: no;3DHotspot: no	MutationAssessor: NA;SIFT: impact: deleterious, score: 0;Polyphen-2: impact: probably_damaging, score: 0.989	MutationAssessor: NA	SIFT: NA	Polyphen-2: NA		Missense_Mutation	SNP	Diploid
PSMB1	Uterine Corpus Endometrial Carcinoma (TCGA, PanCancer Atlas)	TCGA-D1-A17R-01	UCEC	Endometrial Carcinoma	Uterine Endometrioid Carcinoma	G84S		OncoKB: NA;CIViC: NA;MyCancerGenome: not present;CancerHotspot: no;3DHotspot: no	MutationAssessor: NA;SIFT: impact: deleterious, score: 0;Polyphen-2: impact: probably_damaging, score: 1	MutationAssessor: NA	SIFT: impact: tolerated, score: 0.05	Polyphen-2: impact: benign	0.43	Missense_Mutation	SNP	Diploid
PSMB1	Uterine Corpus Endometrial Carcinoma (TCGA, PanCancer Atlas)	TCGA-A5-A2K5-01	UCEC	Endometrial Carcinoma	Uterine Endometrioid Carcinoma	S106A		OncoKB: NA;CIViC: NA;MyCancerGenome: not present;CancerHotspot: no;3DHotspot: no	MutationAssessor: NA;SIFT: impact: tolerated, score: 0.33;Polyphen-2: impact: possibly_damaging, score: 0.877	MutationAssessor: NA	SIFT: impact: deleterious, score: 0	Polyphen-2: impact: possibly_damaging	0.88	Missense_Mutation	SNP	Diploid
PSMB1	Uterine Corpus Endometrial Carcinoma (TCGA, PanCancer Atlas)	TCGA-AX-A2HC-01	UCEC	Endometrial Carcinoma	Uterine Endometrioid Carcinoma	K184N		OncoKB: NA;CIViC: NA;MyCancerGenome: not present;CancerHotspot: no;3DHotspot: no	MutationAssessor: NA;SIFT: impact: deleterious, score: 0;Polyphen-2: impact: possibly_damaging, score: 0.817	MutationAssessor: NA	SIFT: NA	Polyphen-2: NA		Missense_Mutation	SNP	Diploid
PSMB1	Uterine Corpus Endometrial Carcinoma (TCGA, PanCancer Atlas)	TCGA-BG-A222-01	UCEC	Endometrial Carcinoma	Uterine Endometrioid Carcinoma	N185S		OncoKB: NA;CIViC: NA;MyCancerGenome: not present;CancerHotspot: no;3DHotspot: no	MutationAssessor: NA;SIFT: impact: deleterious, score: 0;Polyphen-2: impact: benign, score: 0.338	MutationAssessor: NA	SIFT: impact: deleterious, score: 0	Polyphen-2: impact: benign	0.39	Missense_Mutation	SNP	Diploid
PSMB1	Uterine Corpus Endometrial Carcinoma (TCGA, PanCancer Atlas)	TCGA-EY-A549-01	UCEC	Endometrial Carcinoma	Uterine Endometrioid Carcinoma	P193L		OncoKB: NA;CIViC: NA;MyCancerGenome: not present;CancerHotspot: no;3DHotspot: no	MutationAssessor: NA;SIFT: impact: tolerated, score: 0.08;Polyphen-2: impact: benign, score: 0.16	MutationAssessor: NA	SIFT: impact: tolerated, score: 0.07	Polyphen-2: impact: possibly_damaging	0.78	Missense_Mutation	SNP	Diploid
PSMB1	Uterine Corpus Endometrial Carcinoma (TCGA, PanCancer Atlas)	TCGA-FI-A2D0-01	UCEC	Endometrial Carcinoma	Uterine Endometrioid Carcinoma	V155I		OncoKB: NA;CIViC: NA;MyCancerGenome: not present;CancerHotspot: no;3DHotspot: no	MutationAssessor: NA;SIFT: impact: tolerated, score: 0.35;Polyphen-2: impact: possibly_damaging, score: 0.515	MutationAssessor: NA	SIFT: impact: deleterious, score: 0	Polyphen-2: impact: probably_damaging	1	Missense_Mutation	SNP	Gain
PSMB1	Lung Adenocarcinoma (TCGA, PanCancer Atlas)	TCGA-86-7711-01	LUAD	Non-Small Cell Lung Cancer	Lung Adenocarcinoma	Q174E		OncoKB: NA;CIViC: NA;MyCancerGenome: not present;CancerHotspot: no;3DHotspot: no	MutationAssessor: NA;SIFT: impact: deleterious, score: 0.04;Polyphen-2: impact: possibly_damaging, score: 0.629	MutationAssessor: NA	SIFT: NA	Polyphen-2: NA		Missense_Mutation	SNP	ShallowDel
PSMB1	Lung Adenocarcinoma (TCGA, PanCancer Atlas)	TCGA-91-6848-01	LUAD	Non-Small Cell Lung Cancer	Lung Adenocarcinoma	I225V		OncoKB: NA;CIViC: NA;MyCancerGenome: not present;CancerHotspot: no;3DHotspot: no	MutationAssessor: NA;SIFT: impact: tolerated, score: 0.46;Polyphen-2: impact: benign, score: 0.023	MutationAssessor: NA	SIFT: NA	Polyphen-2: NA		Missense_Mutation	SNP	Gain
PSMB1	Skin Cutaneous Melanoma (TCGA, PanCancer Atlas)	TCGA-D9-A1JX-06	SKCM	Melanoma	Cutaneous Melanoma	H86Y		OncoKB: NA;CIViC: NA;MyCancerGenome: not present;CancerHotspot: no;3DHotspot: no	MutationAssessor: NA;SIFT: impact: tolerated, score: 1;Polyphen-2: impact: probably_damaging, score: 0.989	MutationAssessor: NA	SIFT: NA	Polyphen-2: NA		Missense_Mutation	SNP	ShallowDel
PSMB1	Skin Cutaneous Melanoma (TCGA, PanCancer Atlas)	TCGA-BF-A1PZ-01	SKCM	Melanoma	Cutaneous Melanoma	G60V		OncoKB: NA;CIViC: NA;MyCancerGenome: not present;CancerHotspot: no;3DHotspot: no	MutationAssessor: NA;SIFT: impact: deleterious, score: 0;Polyphen-2: impact: probably_damaging, score: 0.934	MutationAssessor: NA	SIFT: NA	Polyphen-2: NA		Missense_Mutation	SNP
PSMB1	Skin Cutaneous Melanoma (TCGA, PanCancer Atlas)	TCGA-D3-A2JP-06	SKCM	Melanoma	Cutaneous Melanoma	G139C		OncoKB: NA;CIViC: NA;MyCancerGenome: not present;CancerHotspot: no;3DHotspot: no	MutationAssessor: NA;SIFT: impact: deleterious, score: 0.02;Polyphen-2: impact: probably_damaging, score: 0.981	MutationAssessor: NA	SIFT: impact: tolerated, score: 0.05	Polyphen-2: impact: possibly_damaging	0.51	Missense_Mutation	SNP	ShallowDel
PSMB1	Skin Cutaneous Melanoma (TCGA, PanCancer Atlas)	TCGA-EE-A184-06	SKCM	Melanoma	Cutaneous Melanoma	S62*		OncoKB: NA;CIViC: NA;MyCancerGenome: not present;CancerHotspot: no;3DHotspot: no	MutationAssessor: NA;SIFT: NA;Polyphen-2: NA	MutationAssessor: NA	SIFT: impact: deleterious, score: 0.02	Polyphen-2: impact: probably_damaging	0.93	Nonsense_Mutation	SNP	ShallowDel
PSMB1	Skin Cutaneous Melanoma (TCGA, PanCancer Atlas)	TCGA-ER-A195-06	SKCM	Melanoma	Cutaneous Melanoma	Q159H		OncoKB: NA;CIViC: NA;MyCancerGenome: not present;CancerHotspot: no;3DHotspot: no	MutationAssessor: NA;SIFT: impact: deleterious, score: 0;Polyphen-2: impact: possibly_damaging, score: 0.813	MutationAssessor: NA	SIFT: impact: tolerated, score: 0.42	Polyphen-2: impact: benign	0.23	Missense_Mutation	SNP	ShallowDel
PSMB1	Skin Cutaneous Melanoma (TCGA, PanCancer Atlas)	TCGA-HR-A2OH-06	SKCM	Melanoma	Cutaneous Melanoma	R66L		OncoKB: NA;CIViC: NA;MyCancerGenome: not present;CancerHotspot: no;3DHotspot: no	MutationAssessor: NA;SIFT: impact: deleterious, score: 0;Polyphen-2: impact: probably_damaging, score: 1	MutationAssessor: NA	SIFT: impact: deleterious, score: 0.03	Polyphen-2: impact: benign	0.22	Missense_Mutation	SNP	Diploid
PSMB1	Stomach Adenocarcinoma (TCGA, PanCancer Atlas)	TCGA-D7-A4YV-01	STAD	Esophagogastric Adenocarcinoma	Tubular Stomach Adenocarcinoma	I43F		OncoKB: NA;CIViC: NA;MyCancerGenome: not present;CancerHotspot: no;3DHotspot: no	MutationAssessor: NA;SIFT: impact: deleterious, score: 0;Polyphen-2: impact: possibly_damaging, score: 0.743	MutationAssessor: NA	SIFT: impact: tolerated, score: 0.22	Polyphen-2: impact: possibly_damaging	0.55	Missense_Mutation	SNP	Diploid
PSMB1	Stomach Adenocarcinoma (TCGA, PanCancer Atlas)	TCGA-HU-8245-01	STAD	Esophagogastric Adenocarcinoma	Papillary Stomach Adenocarcinoma	Y8*		OncoKB: NA;CIViC: NA;MyCancerGenome: not present;CancerHotspot: no;3DHotspot: no	MutationAssessor: NA;SIFT: NA;Polyphen-2: NA	MutationAssessor: NA	SIFT: NA	Polyphen-2: NA		Nonsense_Mutation	SNP	Diploid
PSMB1	Stomach Adenocarcinoma (TCGA, PanCancer Atlas)	TCGA-VQ-A91E-01	STAD	Esophagogastric Adenocarcinoma	Tubular Stomach Adenocarcinoma	F61V		OncoKB: NA;CIViC: NA;MyCancerGenome: not present;CancerHotspot: no;3DHotspot: no	MutationAssessor: NA;SIFT: impact: deleterious, score: 0;Polyphen-2: impact: benign, score: 0.102	MutationAssessor: NA	SIFT: impact: deleterious, score: 0.03	Polyphen-2: impact: benign	0	Missense_Mutation	SNP	Diploid
PSMB1	Colorectal Adenocarcinoma (TCGA, PanCancer Atlas)	TCGA-DM-A28M-01	COAD	Colorectal Adenocarcinoma	Colon Adenocarcinoma	G182D		OncoKB: NA;CIViC: NA;MyCancerGenome: not present;CancerHotspot: no;3DHotspot: no	MutationAssessor: NA;SIFT: impact: deleterious, score: 0.01;Polyphen-2: impact: probably_damaging, score: 0.965	MutationAssessor: NA	SIFT: impact: tolerated, score: 0.39	Polyphen-2: impact: benign	0.1	Missense_Mutation	SNP	Gain
PSMB1	Kidney Renal Papillary Cell Carcinoma (TCGA, PanCancer Atlas)	TCGA-2Z-A9JQ-01	KIRP	Renal Non-Clear Cell Carcinoma	Papillary Renal Cell Carcinoma	P25T		OncoKB: NA;CIViC: NA;MyCancerGenome: not present;CancerHotspot: no;3DHotspot: no	MutationAssessor: NA;SIFT: NA;Polyphen-2: NA	MutationAssessor: NA	SIFT: impact: tolerated, score: 0.39	Polyphen-2: impact: benign	0.1	Missense_Mutation	SNP	Diploid
PSMB1	Head and Neck Squamous Cell Carcinoma (TCGA, PanCancer Atlas)	TCGA-D6-8569-01	HNSC	Head and Neck Squamous Cell Carcinoma	Head and Neck Squamous Cell Carcinoma	I80T		OncoKB: NA;CIViC: NA;MyCancerGenome: not present;CancerHotspot: no;3DHotspot: no	MutationAssessor: NA;SIFT: impact: deleterious, score: 0;Polyphen-2: impact: probably_damaging, score: 0.998	MutationAssessor: NA	SIFT: impact: tolerated, score: 0.06	Polyphen-2: impact: probably_damaging	0.98	Missense_Mutation	SNP	Diploid
PSMB1	Cervical Squamous Cell Carcinoma (TCGA, PanCancer Atlas)	TCGA-Q1-A73O-01	CESC	Cervical Squamous Cell Carcinoma	Cervical Squamous Cell Carcinoma	E190Q		OncoKB: NA;CIViC: NA;MyCancerGenome: not present;CancerHotspot: no;3DHotspot: no	MutationAssessor: NA;SIFT: impact: tolerated, score: 0.28;Polyphen-2: impact: benign, score: 0.011	MutationAssessor: NA	SIFT: impact: tolerated, score: 0.08	Polyphen-2: impact: benign	0.08	Missense_Mutation	SNP	Diploid
PSMB1	Mesothelioma (TCGA, PanCancer Atlas)	TCGA-3H-AB3L-01	MESO	Pleural Mesothelioma	Pleural Mesothelioma, Epithelioid Type	X38_splice		OncoKB: NA;CIViC: NA;MyCancerGenome: not present;CancerHotspot: no;3DHotspot: no	MutationAssessor: NA;SIFT: NA;Polyphen-2: NA	MutationAssessor: NA	SIFT: impact: tolerated, score: 0.08	Polyphen-2: impact: benign	score: 0.078	Splice_Region	SNP	ShallowDel
PSMB2	Ovarian Serous Cystadenocarcinoma (TCGA, PanCancer Atlas)	TCGA-59-2355-01	OV	Ovarian Epithelial Tumor	Serous Ovarian Cancer	PSMB2-C1orf94	rs = -0.0706, q-value = 0.490	OncoKB: Unknown, level NA, resistance NA;CIViC: NA;MyCancerGenome: not present;CancerHotspot: no;3DHotspot: no	MutationAssessor: NA;SIFT: NA;Polyphen-2: NA	MutationAssessor: NA	SIFT: impact: deleterious, score: 0	Polyphen-2: impact: probably_damaging	1	fusion	FUSION	Amp
PSMB2	Liver Hepatocellular Carcinoma (TCGA, PanCancer Atlas)	TCGA-BC-A112-01	LIHC	Hepatocellular Carcinoma	Hepatocellular Carcinoma	PSMB2-DENND6B	rs = 0.149, q-value = 0.0162	OncoKB: Unknown, level NA, resistance NA;CIViC: NA;MyCancerGenome: not present;CancerHotspot: no;3DHotspot: no	MutationAssessor: NA;SIFT: NA;Polyphen-2: NA	MutationAssessor: NA	SIFT: impact: deleterious, score: 0	Polyphen-2: impact: probably_damaging	1	fusion	FUSION	Amp
PSMB2	Liver Hepatocellular Carcinoma (TCGA, PanCancer Atlas)	TCGA-BC-A112-01	LIHC	Hepatocellular Carcinoma	Hepatocellular Carcinoma	CNOT1-PSMB2	rs = 0.0584, q-value = 0.406	OncoKB: Unknown, level NA, resistance NA;CIViC: NA;MyCancerGenome: not present;CancerHotspot: no;3DHotspot: no	MutationAssessor: NA;SIFT: NA;Polyphen-2: NA	MutationAssessor: NA	SIFT: impact: deleterious, score: 0	Polyphen-2: impact: probably_damaging	1	fusion	FUSION	Amp
PSMB2	Breast Invasive Carcinoma (TCGA, PanCancer Atlas)	TCGA-EW-A1OV-01	BRCA	Invasive Breast Carcinoma	Breast Invasive Ductal Carcinoma	SGMS1-PSMB2		OncoKB: Unknown, level NA, resistance NA;CIViC: NA;MyCancerGenome: not present;CancerHotspot: no;3DHotspot: no	MutationAssessor: NA;SIFT: NA;Polyphen-2: NA	MutationAssessor: NA	SIFT: impact: deleterious, score: 0	Polyphen-2: impact: probably_damaging	1	fusion	FUSION	Gain
PSMB2	Breast Invasive Carcinoma (TCGA, PanCancer Atlas)	TCGA-OK-A5Q2-01	BRCA	Invasive Breast Carcinoma	Breast Invasive Lobular Carcinoma	DHDDS-PSMB2		OncoKB: Unknown, level NA, resistance NA;CIViC: NA;MyCancerGenome: not present;CancerHotspot: no;3DHotspot: no	MutationAssessor: NA;SIFT: NA;Polyphen-2: NA	MutationAssessor: NA	SIFT: impact: tolerated, score: 0.68	Polyphen-2: impact: benign	0.06	fusion	FUSION	Gain
PSMB2	Brain Lower Grade Glioma (TCGA, PanCancer Atlas)	TCGA-DU-6392-01	LGG	Diffuse Glioma	Astrocytoma	K37N		OncoKB: NA;CIViC: NA;MyCancerGenome: not present;CancerHotspot: no;3DHotspot: no	MutationAssessor: NA;SIFT: impact: tolerated, score: 0.05;Polyphen-2: impact: benign, score: 0.432	MutationAssessor: NA	SIFT: impact: tolerated, score: 1	Polyphen-2: impact: benign	0.02	Missense_Mutation	SNP	Diploid
PSMB2	Glioblastoma Multiforme (TCGA, PanCancer Atlas)	TCGA-19-0957-01	GBM	Glioblastoma	Glioblastoma Multiforme	A81T		OncoKB: NA;CIViC: NA;MyCancerGenome: not present;CancerHotspot: no;3DHotspot: no	MutationAssessor: NA;SIFT: impact: deleterious, score: 0;Polyphen-2: impact: possibly_damaging, score: 0.881	MutationAssessor: NA	SIFT: impact: deleterious, score: 0	Polyphen-2: impact: benign	0.39	Missense_Mutation	SNP	Diploid
PSMB2	Diffuse Large B-Cell Lymphoma (TCGA, PanCancer Atlas)	TCGA-GS-A9TY-01	DLBC	Mature B-Cell Neoplasms	Diffuse Large B-Cell Lymphoma, NOS	V47Wfs*21		OncoKB: NA;CIViC: NA;MyCancerGenome: not present;CancerHotspot: no;3DHotspot: no	MutationAssessor: NA;SIFT: NA;Polyphen-2: NA	MutationAssessor: NA	SIFT: impact: deleterious, score: 0	Polyphen-2: impact: probably_damaging	0.95	Frame_Shift_Del	DEL	Diploid
PSMB2	Bladder Urothelial Carcinoma (TCGA, PanCancer Atlas)	TCGA-DK-A6AW-01	BLCA	Bladder Urothelial Carcinoma	Bladder Urothelial Carcinoma	R70Q		OncoKB: NA;CIViC: NA;MyCancerGenome: not present;CancerHotspot: no;3DHotspot: no	MutationAssessor: NA;SIFT: impact: deleterious, score: 0;Polyphen-2: impact: benign, score: 0.387	MutationAssessor: NA	SIFT: impact: deleterious, score: 0	Polyphen-2: impact: benign	0.06	Missense_Mutation	SNP	Diploid
PSMB2	Bladder Urothelial Carcinoma (TCGA, PanCancer Atlas)	TCGA-XF-AAN1-01	BLCA	Bladder Urothelial Carcinoma	Bladder Urothelial Carcinoma	P176S		OncoKB: NA;CIViC: NA;MyCancerGenome: not present;CancerHotspot: no;3DHotspot: no	MutationAssessor: NA;SIFT: impact: tolerated, score: 0.07;Polyphen-2: impact: possibly_damaging, score: 0.775	MutationAssessor: NA	SIFT: impact: deleterious, score: 0	Polyphen-2: impact: probably_damaging	1	Missense_Mutation	SNP	Diploid
PSMB2	Liver Hepatocellular Carcinoma (TCGA, PanCancer Atlas)	TCGA-2Y-A9H0-01	LIHC	Hepatocellular Carcinoma	Hepatocellular Carcinoma	G106D		OncoKB: NA;CIViC: NA;MyCancerGenome: not present;CancerHotspot: no;3DHotspot: no	MutationAssessor: NA;SIFT: impact: deleterious, score: 0;Polyphen-2: impact: probably_damaging, score: 1	MutationAssessor: NA	SIFT: impact: tolerated, score: 0.35	Polyphen-2: impact: benign	0	Missense_Mutation	SNP	Diploid
PSMB2	Prostate Adenocarcinoma (TCGA, PanCancer Atlas)	TCGA-XK-AAIW-01	PRAD	Prostate Adenocarcinoma	Prostate Adenocarcinoma	R70*		OncoKB: NA;CIViC: NA;MyCancerGenome: not present;CancerHotspot: no;3DHotspot: no	MutationAssessor: NA;SIFT: NA;Polyphen-2: NA	MutationAssessor: NA	SIFT: NA	Polyphen-2: NA		Nonsense_Mutation	SNP	Diploid
PSMB2	Uterine Corpus Endometrial Carcinoma (TCGA, PanCancer Atlas)	TCGA-EO-A22X-01	UCEC	Endometrial Carcinoma	Uterine Endometrioid Carcinoma	R181*		OncoKB: NA;CIViC: NA;MyCancerGenome: not present;CancerHotspot: no;3DHotspot: no	MutationAssessor: NA;SIFT: NA;Polyphen-2: NA	MutationAssessor: NA	SIFT: impact: deleterious, score: 0.02	Polyphen-2: impact: probably_damaging	0.98	Nonsense_Mutation	SNP	Diploid
PSMB2	Uterine Corpus Endometrial Carcinoma (TCGA, PanCancer Atlas)	TCGA-AP-A051-01	UCEC	Endometrial Carcinoma	Uterine Endometrioid Carcinoma	R70*		OncoKB: NA;CIViC: NA;MyCancerGenome: not present;CancerHotspot: no;3DHotspot: no	MutationAssessor: NA;SIFT: NA;Polyphen-2: NA	MutationAssessor: NA	SIFT: NA	Polyphen-2: NA		Nonsense_Mutation	SNP	Diploid
PSMB2	Uterine Corpus Endometrial Carcinoma (TCGA, PanCancer Atlas)	TCGA-FI-A2D5-01	UCEC	Endometrial Carcinoma	Uterine Endometrioid Carcinoma	R70*		OncoKB: NA;CIViC: NA;MyCancerGenome: not present;CancerHotspot: no;3DHotspot: no	MutationAssessor: NA;SIFT: NA;Polyphen-2: NA	MutationAssessor: NA	SIFT: NA	Polyphen-2: NA		Nonsense_Mutation	SNP	Diploid
PSMB2	Uterine Corpus Endometrial Carcinoma (TCGA, PanCancer Atlas)	TCGA-D1-A0ZS-01	UCEC	Endometrial Carcinoma	Uterine Endometrioid Carcinoma	S141T		OncoKB: NA;CIViC: NA;MyCancerGenome: not present;CancerHotspot: no;3DHotspot: no	MutationAssessor: NA;SIFT: impact: tolerated, score: 0.05;Polyphen-2: impact: possibly_damaging, score: 0.506	MutationAssessor: NA	SIFT: NA	Polyphen-2: NA		Missense_Mutation	SNP	Diploid
PSMB2	Uterine Corpus Endometrial Carcinoma (TCGA, PanCancer Atlas)	TCGA-QF-A5YS-01	UCEC	Endometrial Carcinoma	Uterine Mixed Endometrial Carcinoma	R95W		OncoKB: NA;CIViC: NA;MyCancerGenome: not present;CancerHotspot: no;3DHotspot: no	MutationAssessor: NA;SIFT: impact: deleterious, score: 0.02;Polyphen-2: impact: probably_damaging, score: 0.933	MutationAssessor: NA	SIFT: NA	Polyphen-2: NA		Missense_Mutation	SNP	Diploid
PSMB2	Uterine Corpus Endometrial Carcinoma (TCGA, PanCancer Atlas)	TCGA-AP-A0LM-01	UCEC	Endometrial Carcinoma	Uterine Endometrioid Carcinoma	R181Q		OncoKB: NA;CIViC: NA;MyCancerGenome: not present;CancerHotspot: no;3DHotspot: no	MutationAssessor: NA;SIFT: impact: tolerated, score: 0.42;Polyphen-2: impact: benign, score: 0.232	MutationAssessor: NA	SIFT: NA	Polyphen-2: NA		Missense_Mutation	SNP	Diploid
PSMB2	Uterine Corpus Endometrial Carcinoma (TCGA, PanCancer Atlas)	TCGA-A5-A0G1-01	UCEC	Endometrial Carcinoma	Uterine Serous Carcinoma/Uterine Papillary Serous Carcinoma	S23I		OncoKB: NA;CIViC: NA;MyCancerGenome: not present;CancerHotspot: no;3DHotspot: no	MutationAssessor: NA;SIFT: impact: deleterious, score: 0.03;Polyphen-2: impact: benign, score: 0.224	MutationAssessor: NA	SIFT: NA	Polyphen-2: NA		Missense_Mutation	SNP	Diploid
PSMB2	Uterine Corpus Endometrial Carcinoma (TCGA, PanCancer Atlas)	TCGA-AX-A2HD-01	UCEC	Endometrial Carcinoma	Uterine Endometrioid Carcinoma	A125T		OncoKB: NA;CIViC: NA;MyCancerGenome: not present;CancerHotspot: no;3DHotspot: no	MutationAssessor: NA;SIFT: impact: tolerated, score: 0.22;Polyphen-2: impact: possibly_damaging, score: 0.545	MutationAssessor: NA	SIFT: NA	Polyphen-2: NA		Missense_Mutation	SNP	Diploid
PSMB2	Uterine Corpus Endometrial Carcinoma (TCGA, PanCancer Atlas)	TCGA-AX-A2HJ-01	UCEC	Endometrial Carcinoma	Uterine Endometrioid Carcinoma	K198Qfs*34		OncoKB: NA;CIViC: NA;MyCancerGenome: not present;CancerHotspot: no;3DHotspot: no	MutationAssessor: NA;SIFT: NA;Polyphen-2: NA	MutationAssessor: NA	SIFT: NA	Polyphen-2: NA		Frame_Shift_Ins	INS	Diploid
PSMB2	Uterine Corpus Endometrial Carcinoma (TCGA, PanCancer Atlas)	TCGA-AX-A2HJ-01	UCEC	Endometrial Carcinoma	Uterine Endometrioid Carcinoma	N24D		OncoKB: NA;CIViC: NA;MyCancerGenome: not present;CancerHotspot: no;3DHotspot: no	MutationAssessor: NA;SIFT: impact: deleterious, score: 0.03;Polyphen-2: impact: benign, score: 0	MutationAssessor: NA	SIFT: impact: tolerated, score: 0.49	Polyphen-2: impact: benign	0.09	Missense_Mutation	SNP	Diploid
PSMB2	Uterine Corpus Endometrial Carcinoma (TCGA, PanCancer Atlas)	TCGA-B5-A3FC-01	UCEC	Endometrial Carcinoma	Uterine Endometrioid Carcinoma	K41N		OncoKB: NA;CIViC: NA;MyCancerGenome: not present;CancerHotspot: no;3DHotspot: no	MutationAssessor: NA;SIFT: impact: tolerated, score: 0.39;Polyphen-2: impact: benign, score: 0.096	MutationAssessor: NA	SIFT: impact: tolerated, score: 0.42	Polyphen-2: impact: probably_damaging	0.96	Missense_Mutation	SNP	Diploid
PSMB2	Uterine Corpus Endometrial Carcinoma (TCGA, PanCancer Atlas)	TCGA-BK-A6W3-01	UCEC	Endometrial Carcinoma	Uterine Endometrioid Carcinoma	K41N		OncoKB: NA;CIViC: NA;MyCancerGenome: not present;CancerHotspot: no;3DHotspot: no	MutationAssessor: NA;SIFT: impact: tolerated, score: 0.39;Polyphen-2: impact: benign, score: 0.096	MutationAssessor: NA	SIFT: impact: deleterious, score: 0.02	Polyphen-2: impact: benign	0.08	Missense_Mutation	SNP	Diploid
PSMB2	Uterine Corpus Endometrial Carcinoma (TCGA, PanCancer Atlas)	TCGA-EO-A22U-01	UCEC	Endometrial Carcinoma	Uterine Endometrioid Carcinoma	P113S		OncoKB: NA;CIViC: NA;MyCancerGenome: not present;CancerHotspot: no;3DHotspot: no	MutationAssessor: NA;SIFT: impact: tolerated, score: 0.06;Polyphen-2: impact: probably_damaging, score: 0.98	MutationAssessor: NA	SIFT: impact: deleterious, score: 0.02	Polyphen-2: impact: benign	0.21	Missense_Mutation	SNP	Diploid
PSMB2	Lung Adenocarcinoma (TCGA, PanCancer Atlas)	TCGA-S2-AA1A-01	LUAD	Non-Small Cell Lung Cancer	Lung Adenocarcinoma	T177I		OncoKB: NA;CIViC: NA;MyCancerGenome: not present;CancerHotspot: no;3DHotspot: no	MutationAssessor: NA;SIFT: impact: tolerated, score: 0.08;Polyphen-2: impact: benign, score: 0.078	MutationAssessor: NA	SIFT: impact: tolerated, score: 0.21	Polyphen-2: impact: benign	0.34	Missense_Mutation	SNP	Diploid
PSMB2	Skin Cutaneous Melanoma (TCGA, PanCancer Atlas)	TCGA-EE-A2M6-06	SKCM	Melanoma	Cutaneous Melanoma	T177I		OncoKB: NA;CIViC: NA;MyCancerGenome: not present;CancerHotspot: no;3DHotspot: no	MutationAssessor: NA;SIFT: impact: tolerated, score: 0.08;Polyphen-2: impact: benign, score: 0.078	MutationAssessor: NA	SIFT: impact: deleterious, score: 0	Polyphen-2: impact: possibly_damaging	0.7	Missense_Mutation	SNP	Gain
PSMB2	Skin Cutaneous Melanoma (TCGA, PanCancer Atlas)	TCGA-3N-A9WC-06	SKCM	Melanoma	Cutaneous Melanoma	R93W		OncoKB: NA;CIViC: NA;MyCancerGenome: not present;CancerHotspot: no;3DHotspot: no	MutationAssessor: NA;SIFT: impact: deleterious, score: 0;Polyphen-2: impact: probably_damaging, score: 0.999	MutationAssessor: NA	SIFT: impact: deleterious, score: 0	Polyphen-2: impact: probably_damaging	0.96	Missense_Mutation	SNP	Diploid
PSMB2	Skin Cutaneous Melanoma (TCGA, PanCancer Atlas)	TCGA-EE-A3JD-06	SKCM	Melanoma	Cutaneous Melanoma	R93W		OncoKB: NA;CIViC: NA;MyCancerGenome: not present;CancerHotspot: no;3DHotspot: no	MutationAssessor: NA;SIFT: impact: deleterious, score: 0;Polyphen-2: impact: probably_damaging, score: 0.999	MutationAssessor: NA	SIFT: impact: deleterious, score: 0	Polyphen-2: impact: probably_damaging	0.99	Missense_Mutation	SNP	Diploid
PSMB2	Skin Cutaneous Melanoma (TCGA, PanCancer Atlas)	TCGA-D3-A3CE-06	SKCM	Melanoma	Cutaneous Melanoma	G135C		OncoKB: NA;CIViC: NA;MyCancerGenome: not present;CancerHotspot: no;3DHotspot: no	MutationAssessor: NA;SIFT: impact: deleterious, score: 0;Polyphen-2: impact: probably_damaging, score: 1	MutationAssessor: NA	SIFT: impact: deleterious, score: 0.01	Polyphen-2: impact: probably_damaging	0.99	Missense_Mutation	SNP	Diploid
PSMB2	Skin Cutaneous Melanoma (TCGA, PanCancer Atlas)	TCGA-EE-A2M7-06	SKCM	Melanoma	Cutaneous Melanoma	X72_splice		OncoKB: NA;CIViC: NA;MyCancerGenome: not present;CancerHotspot: no;3DHotspot: no	MutationAssessor: NA;SIFT: NA;Polyphen-2: NA	MutationAssessor: NA	SIFT: NA	Polyphen-2: NA		Splice_Site	SNP	Diploid
PSMB2	Skin Cutaneous Melanoma (TCGA, PanCancer Atlas)	TCGA-EE-A2MD-06	SKCM	Melanoma	Cutaneous Melanoma	P149=		OncoKB: NA;CIViC: NA;MyCancerGenome: not present;CancerHotspot: no;3DHotspot: no	MutationAssessor: NA;SIFT: NA;Polyphen-2: NA	MutationAssessor: NA	SIFT: impact: deleterious, score: 0.03	Polyphen-2: impact: possibly_damaging	score: 0.868	Splice_Region	SNP	Gain
PSMB2	Skin Cutaneous Melanoma (TCGA, PanCancer Atlas)	TCGA-FS-A1ZM-06	SKCM	Melanoma	Cutaneous Melanoma	D144Y		OncoKB: NA;CIViC: NA;MyCancerGenome: not present;CancerHotspot: no;3DHotspot: no	MutationAssessor: NA;SIFT: impact: deleterious, score: 0;Polyphen-2: impact: probably_damaging, score: 1	MutationAssessor: NA	SIFT: impact: deleterious, score: 0	Polyphen-2: impact: probably_damaging	0.99	Missense_Mutation	SNP	Diploid
PSMB2	Stomach Adenocarcinoma (TCGA, PanCancer Atlas)	TCGA-CG-5733-01	STAD	Esophagogastric Adenocarcinoma	Intestinal Type Stomach Adenocarcinoma	A123T		OncoKB: NA;CIViC: NA;MyCancerGenome: not present;CancerHotspot: no;3DHotspot: no	MutationAssessor: NA;SIFT: impact: tolerated, score: 0.68;Polyphen-2: impact: benign, score: 0.057	MutationAssessor: NA	SIFT: impact: tolerated, score: 0.06	Polyphen-2: impact: benign	0.03	Missense_Mutation	SNP	Diploid
PSMB2	Stomach Adenocarcinoma (TCGA, PanCancer Atlas)	TCGA-HU-A4GQ-01	STAD	Esophagogastric Adenocarcinoma	Tubular Stomach Adenocarcinoma	Y3C		OncoKB: NA;CIViC: NA;MyCancerGenome: not present;CancerHotspot: no;3DHotspot: no	MutationAssessor: NA;SIFT: impact: tolerated, score: 1;Polyphen-2: impact: benign, score: 0.023	MutationAssessor: NA	SIFT: impact: tolerated, score: 0.12	Polyphen-2: impact: benign	0.01	Missense_Mutation	SNP	Diploid
PSMB2	Colorectal Adenocarcinoma (TCGA, PanCancer Atlas)	TCGA-EI-6917-01	READ	Colorectal Adenocarcinoma	Rectal Adenocarcinoma	R70Q		OncoKB: NA;CIViC: NA;MyCancerGenome: not present;CancerHotspot: no;3DHotspot: no	MutationAssessor: NA;SIFT: impact: deleterious, score: 0;Polyphen-2: impact: benign, score: 0.387	MutationAssessor: NA	SIFT: impact: deleterious, score: 0	Polyphen-2: impact: possibly_damaging	0.5	Missense_Mutation	SNP	Diploid
PSMB2	Colorectal Adenocarcinoma (TCGA, PanCancer Atlas)	TCGA-AA-3947-01	COAD	Colorectal Adenocarcinoma	Mucinous Adenocarcinoma of the Colon and Rectum	L138P		OncoKB: NA;CIViC: NA;MyCancerGenome: not present;CancerHotspot: no;3DHotspot: no	MutationAssessor: NA;SIFT: impact: deleterious, score: 0;Polyphen-2: impact: probably_damaging, score: 0.946	MutationAssessor: NA	SIFT: impact: deleterious, score: 0	Polyphen-2: impact: possibly_damaging	0.5	Missense_Mutation	SNP	Diploid
PSMB2	Colorectal Adenocarcinoma (TCGA, PanCancer Atlas)	TCGA-AA-3949-01	COAD	Colorectal Adenocarcinoma	Mucinous Adenocarcinoma of the Colon and Rectum	R95L		OncoKB: NA;CIViC: NA;MyCancerGenome: not present;CancerHotspot: no;3DHotspot: no	MutationAssessor: NA;SIFT: impact: deleterious, score: 0;Polyphen-2: impact: benign, score: 0.06	MutationAssessor: NA	SIFT: impact: tolerated, score: 0.39	Polyphen-2: impact: benign	0.16	Missense_Mutation	SNP	Diploid
PSMB2	Colorectal Adenocarcinoma (TCGA, PanCancer Atlas)	TCGA-CM-5348-01	COAD	Colorectal Adenocarcinoma	Colon Adenocarcinoma	R170H		OncoKB: NA;CIViC: NA;MyCancerGenome: not present;CancerHotspot: no;3DHotspot: no	MutationAssessor: NA;SIFT: impact: deleterious, score: 0;Polyphen-2: impact: probably_damaging, score: 1	MutationAssessor: NA	SIFT: impact: deleterious, score: 0.01	Polyphen-2: impact: benign	0.07	Missense_Mutation	SNP	Diploid
PSMB2	Head and Neck Squamous Cell Carcinoma (TCGA, PanCancer Atlas)	TCGA-CV-7235-01	HNSC	Head and Neck Squamous Cell Carcinoma	Head and Neck Squamous Cell Carcinoma	S179T		OncoKB: NA;CIViC: NA;MyCancerGenome: not present;CancerHotspot: no;3DHotspot: no	MutationAssessor: NA;SIFT: impact: tolerated, score: 0.35;Polyphen-2: impact: benign, score: 0.003	MutationAssessor: NA	SIFT: impact: deleterious, score: 0.01	Polyphen-2: impact: benign	0.07	Missense_Mutation	SNP	Gain
PSMB2	Head and Neck Squamous Cell Carcinoma (TCGA, PanCancer Atlas)	TCGA-CN-6010-01	HNSC	Head and Neck Squamous Cell Carcinoma	Head and Neck Squamous Cell Carcinoma	E109*		OncoKB: NA;CIViC: NA;MyCancerGenome: not present;CancerHotspot: no;3DHotspot: no	MutationAssessor: NA;SIFT: NA;Polyphen-2: NA	MutationAssessor: NA	SIFT: impact: deleterious, score: 0.02	Polyphen-2: impact: probably_damaging	0.91	Nonsense_Mutation	SNP	Diploid
PSMB2	Cervical Squamous Cell Carcinoma (TCGA, PanCancer Atlas)	TCGA-EK-A2RC-01	CESC	Cervical Squamous Cell Carcinoma	Cervical Squamous Cell Carcinoma	L4F		OncoKB: NA;CIViC: NA;MyCancerGenome: not present;CancerHotspot: no;3DHotspot: no	MutationAssessor: NA;SIFT: impact: deleterious, score: 0.02;Polyphen-2: impact: probably_damaging, score: 0.975	MutationAssessor: NA	SIFT: impact: tolerated, score: 0.05	Polyphen-2: impact: benign	0.03	Missense_Mutation	SNP	Diploid
PSMB3	Ovarian Serous Cystadenocarcinoma (TCGA, PanCancer Atlas)	TCGA-13-0893-01	OV	Ovarian Epithelial Tumor	Serous Ovarian Cancer	PSMB3-CISD3		OncoKB: Unknown, level NA, resistance NA;CIViC: NA;MyCancerGenome: not present;CancerHotspot: no;3DHotspot: no	MutationAssessor: NA;SIFT: NA;Polyphen-2: NA	MutationAssessor: NA	SIFT: impact: deleterious, score: 0	Polyphen-2: impact: probably_damaging	0.99	fusion	FUSION	ShallowDel
PSMB3	Bladder Urothelial Carcinoma (TCGA, PanCancer Atlas)	TCGA-E7-A97Q-01	BLCA	Bladder Urothelial Carcinoma	Bladder Urothelial Carcinoma	PSMB3-KIAA1257		OncoKB: Unknown, level NA, resistance NA;CIViC: NA;MyCancerGenome: not present;CancerHotspot: no;3DHotspot: no	MutationAssessor: NA;SIFT: NA;Polyphen-2: NA	MutationAssessor: NA	SIFT: impact: deleterious, score: 0	Polyphen-2: impact: probably_damaging	0.95	fusion	FUSION	Diploid
PSMB3	Bladder Urothelial Carcinoma (TCGA, PanCancer Atlas)	TCGA-ZF-AA4T-01	BLCA	Bladder Urothelial Carcinoma	Bladder Urothelial Carcinoma	SRCIN1-PSMB3	rs = -0.00966, q-value = 0.893	OncoKB: Unknown, level NA, resistance NA;CIViC: NA;MyCancerGenome: not present;CancerHotspot: no;3DHotspot: no	MutationAssessor: NA;SIFT: NA;Polyphen-2: NA	MutationAssessor: NA	SIFT: impact: deleterious, score: 0	Polyphen-2: impact: probably_damaging	0.95	fusion	FUSION	Amp
PSMB3	Esophageal Adenocarcinoma (TCGA, PanCancer Atlas)	TCGA-JY-A6FA-01	ESCA	Esophageal Squamous Cell Carcinoma	Esophageal Squamous Cell Carcinoma	ERBB2-PSMB3		OncoKB: Unknown, level NA, resistance NA;CIViC: NA;MyCancerGenome: not present;CancerHotspot: no;3DHotspot: no	MutationAssessor: NA;SIFT: NA;Polyphen-2: NA	MutationAssessor: NA	SIFT: impact: deleterious, score: 0	Polyphen-2: impact: probably_damaging	0.95	fusion	FUSION	Diploid
PSMB3	Esophageal Adenocarcinoma (TCGA, PanCancer Atlas)	TCGA-L5-A88V-01	ESCA	Esophagogastric Adenocarcinoma	Esophageal Adenocarcinoma	ERBB2-PSMB3	rs = -0.253, q-value = 6.027e-3	OncoKB: Unknown, level NA, resistance NA;CIViC: NA;MyCancerGenome: not present;CancerHotspot: no;3DHotspot: no	MutationAssessor: NA;SIFT: NA;Polyphen-2: NA	MutationAssessor: NA	SIFT: impact: tolerated, score: 0.12	Polyphen-2: impact: possibly_damaging	0.87	fusion	FUSION	Amp
PSMB3	Breast Invasive Carcinoma (TCGA, PanCancer Atlas)	TCGA-A2-A1G1-01	BRCA	Invasive Breast Carcinoma	Breast Invasive Ductal Carcinoma	ERBB2-PSMB3		OncoKB: Unknown, level NA, resistance NA;CIViC: NA;MyCancerGenome: not present;CancerHotspot: no;3DHotspot: no	MutationAssessor: NA;SIFT: NA;Polyphen-2: NA	MutationAssessor: NA	SIFT: impact: tolerated, score: 0.21	Polyphen-2: impact: benign	0.34	fusion	FUSION	Gain
PSMB3	Breast Invasive Carcinoma (TCGA, PanCancer Atlas)	TCGA-C8-A132-01	BRCA	Invasive Breast Carcinoma	Breast Invasive Ductal Carcinoma	PSMB3-FAM117A	rs = 0.0406, q-value = 0.249	OncoKB: Unknown, level NA, resistance NA;CIViC: NA;MyCancerGenome: not present;CancerHotspot: no;3DHotspot: no	MutationAssessor: NA;SIFT: NA;Polyphen-2: NA	MutationAssessor: NA	SIFT: NA	Polyphen-2: NA		fusion	FUSION	Amp
PSMB3	Breast Invasive Carcinoma (TCGA, PanCancer Atlas)	TCGA-E2-A14Y-01	BRCA	Invasive Breast Carcinoma	Breast Invasive Ductal Carcinoma	PSMB3-CWC25	rs = 0.351, q-value = 2.99e-29	OncoKB: Unknown, level NA, resistance NA;CIViC: NA;MyCancerGenome: not present;CancerHotspot: no;3DHotspot: no	MutationAssessor: NA;SIFT: NA;Polyphen-2: NA	MutationAssessor: NA	SIFT: impact: tolerated, score: 0.06	Polyphen-2: impact: benign	0.03	fusion	FUSION	Amp
PSMB3	Adrenocortical Carcinoma (TCGA, PanCancer Atlas)	TCGA-PK-A5HB-01	ACC	Adrenocortical Carcinoma	Adrenocortical Carcinoma	A64V		OncoKB: NA;CIViC: NA;MyCancerGenome: not present;CancerHotspot: no;3DHotspot: no	MutationAssessor: NA;SIFT: impact: tolerated, score: 0.49;Polyphen-2: impact: benign, score: 0.094	MutationAssessor: NA	SIFT: impact: tolerated, score: 0.06	Polyphen-2: impact: benign	0.03	Missense_Mutation	SNP	ShallowDel
PSMB3	Brain Lower Grade Glioma (TCGA, PanCancer Atlas)	TCGA-E1-A7YU-01	LGG	Diffuse Glioma	Oligoastrocytoma	L67F		OncoKB: NA;CIViC: NA;MyCancerGenome: not present;CancerHotspot: no;3DHotspot: no	MutationAssessor: NA;SIFT: impact: tolerated, score: 0.42;Polyphen-2: impact: probably_damaging, score: 0.963	MutationAssessor: NA	SIFT: impact: deleterious, score: 0	Polyphen-2: impact: probably_damaging	0.96	Missense_Mutation	SNP	Diploid
PSMB3	Glioblastoma Multiforme (TCGA, PanCancer Atlas)	TCGA-06-1802-01	GBM	Glioblastoma	Glioblastoma Multiforme	K17R		OncoKB: NA;CIViC: NA;MyCancerGenome: not present;CancerHotspot: no;3DHotspot: no	MutationAssessor: NA;SIFT: impact: deleterious, score: 0.02;Polyphen-2: impact: benign, score: 0.076	MutationAssessor: NA	SIFT: NA	Polyphen-2: NA		Missense_Mutation	SNP	Diploid
PSMB3	Lung Squamous Cell Carcinoma (TCGA, PanCancer Atlas)	TCGA-22-5473-01	LUSC	Non-Small Cell Lung Cancer	Lung Squamous Cell Carcinoma	P160L		OncoKB: NA;CIViC: NA;MyCancerGenome: not present;CancerHotspot: no;3DHotspot: no	MutationAssessor: NA;SIFT: impact: deleterious, score: 0.02;Polyphen-2: impact: benign, score: 0.205	MutationAssessor: NA	SIFT: NA	Polyphen-2: NA		Missense_Mutation	SNP	Gain
PSMB3	Lung Squamous Cell Carcinoma (TCGA, PanCancer Atlas)	TCGA-63-A5MM-01	LUSC	Non-Small Cell Lung Cancer	Lung Squamous Cell Carcinoma	Q33H		OncoKB: NA;CIViC: NA;MyCancerGenome: not present;CancerHotspot: no;3DHotspot: no	MutationAssessor: NA;SIFT: impact: tolerated, score: 0.21;Polyphen-2: impact: benign, score: 0.34	MutationAssessor: NA	SIFT: impact: tolerated, score: 0.07	Polyphen-2: impact: benign	0.16	Missense_Mutation	SNP	Diploid
PSMB3	Lung Squamous Cell Carcinoma (TCGA, PanCancer Atlas)	TCGA-18-3406-01	LUSC	Non-Small Cell Lung Cancer	Lung Squamous Cell Carcinoma	Q31K		OncoKB: NA;CIViC: NA;MyCancerGenome: not present;CancerHotspot: no;3DHotspot: no	MutationAssessor: NA;SIFT: impact: deleterious, score: 0;Polyphen-2: impact: possibly_damaging, score: 0.696	MutationAssessor: NA	SIFT: impact: deleterious, score: 0	Polyphen-2: impact: probably_damaging	1	Missense_Mutation	SNP	Diploid
PSMB3	Lung Squamous Cell Carcinoma (TCGA, PanCancer Atlas)	TCGA-37-4130-01	LUSC	Non-Small Cell Lung Cancer	Lung Squamous Cell Carcinoma	G29A		OncoKB: NA;CIViC: NA;MyCancerGenome: not present;CancerHotspot: no;3DHotspot: no	MutationAssessor: NA;SIFT: impact: deleterious, score: 0;Polyphen-2: impact: probably_damaging, score: 0.955	MutationAssessor: NA	SIFT: impact: tolerated, score: 0.22	Polyphen-2: impact: probably_damaging	0.96	Missense_Mutation	SNP	Diploid
PSMB3	Bladder Urothelial Carcinoma (TCGA, PanCancer Atlas)	TCGA-FD-A6TG-01	BLCA	Bladder Urothelial Carcinoma	Bladder Urothelial Carcinoma	A23D		OncoKB: NA;CIViC: NA;MyCancerGenome: not present;CancerHotspot: no;3DHotspot: no	MutationAssessor: NA;SIFT: impact: deleterious, score: 0;Polyphen-2: impact: probably_damaging, score: 0.985	MutationAssessor: NA	SIFT: impact: deleterious, score: 0.02	Polyphen-2: impact: possibly_damaging	0.81	Missense_Mutation	SNP	Diploid
PSMB3	Bladder Urothelial Carcinoma (TCGA, PanCancer Atlas)	TCGA-MV-A51V-01	BLCA	Bladder Urothelial Carcinoma	Bladder Urothelial Carcinoma	L76F		OncoKB: NA;CIViC: NA;MyCancerGenome: not present;CancerHotspot: no;3DHotspot: no	MutationAssessor: NA;SIFT: impact: deleterious, score: 0.01;Polyphen-2: impact: probably_damaging, score: 0.994	MutationAssessor: NA	SIFT: impact: deleterious, score: 0.01	Polyphen-2: impact: possibly_damaging	0.52	Missense_Mutation	SNP	Gain
PSMB3	Bladder Urothelial Carcinoma (TCGA, PanCancer Atlas)	TCGA-KQ-A41N-01	BLCA	Bladder Urothelial Carcinoma	Bladder Urothelial Carcinoma	E144*		OncoKB: NA;CIViC: NA;MyCancerGenome: not present;CancerHotspot: no;3DHotspot: no	MutationAssessor: NA;SIFT: NA;Polyphen-2: NA	MutationAssessor: NA	SIFT: NA	Polyphen-2: NA		Nonsense_Mutation	SNP	Diploid
PSMB3	Liver Hepatocellular Carcinoma (TCGA, PanCancer Atlas)	TCGA-WQ-A9G7-01	LIHC	Hepatocellular Carcinoma	Hepatocellular Carcinoma	X99_splice		OncoKB: NA;CIViC: NA;MyCancerGenome: not present;CancerHotspot: no;3DHotspot: no	MutationAssessor: NA;SIFT: NA;Polyphen-2: NA	MutationAssessor: NA	SIFT: NA	Polyphen-2: NA		Splice_Site	SNP	Diploid
PSMB3	Prostate Adenocarcinoma (TCGA, PanCancer Atlas)	TCGA-XK-AAIW-01	PRAD	Prostate Adenocarcinoma	Prostate Adenocarcinoma	A170V		OncoKB: NA;CIViC: NA;MyCancerGenome: not present;CancerHotspot: no;3DHotspot: no	MutationAssessor: NA;SIFT: impact: deleterious, score: 0.03;Polyphen-2: impact: possibly_damaging, score: 0.868	MutationAssessor: NA	SIFT: NA	Polyphen-2: NA		Missense_Mutation	SNP	Diploid
PSMB3	Uterine Corpus Endometrial Carcinoma (TCGA, PanCancer Atlas)	TCGA-A5-A0G1-01	UCEC	Endometrial Carcinoma	Uterine Serous Carcinoma/Uterine Papillary Serous Carcinoma	A23D		OncoKB: NA;CIViC: NA;MyCancerGenome: not present;CancerHotspot: no;3DHotspot: no	MutationAssessor: NA;SIFT: impact: deleterious, score: 0;Polyphen-2: impact: probably_damaging, score: 0.985	MutationAssessor: NA	SIFT: NA	Polyphen-2: NA		Missense_Mutation	SNP	Diploid
PSMB3	Uterine Corpus Endometrial Carcinoma (TCGA, PanCancer Atlas)	TCGA-A5-A0G2-01	UCEC	Endometrial Carcinoma	Uterine Serous Carcinoma/Uterine Papillary Serous Carcinoma	R66C		OncoKB: NA;CIViC: NA;MyCancerGenome: not present;CancerHotspot: no;3DHotspot: no	MutationAssessor: NA;SIFT: impact: tolerated, score: 0.06;Polyphen-2: impact: benign, score: 0.029	MutationAssessor: NA	SIFT: NA	Polyphen-2: NA		Missense_Mutation	SNP	Diploid
PSMB3	Uterine Corpus Endometrial Carcinoma (TCGA, PanCancer Atlas)	TCGA-B5-A11E-01	UCEC	Endometrial Carcinoma	Uterine Endometrioid Carcinoma	R66H		OncoKB: NA;CIViC: NA;MyCancerGenome: not present;CancerHotspot: no;3DHotspot: no	MutationAssessor: NA;SIFT: impact: tolerated, score: 0.12;Polyphen-2: impact: benign, score: 0.013	MutationAssessor: NA	SIFT: NA	Polyphen-2: NA		Missense_Mutation	SNP	Diploid
PSMB3	Uterine Corpus Endometrial Carcinoma (TCGA, PanCancer Atlas)	TCGA-BS-A0UF-01	UCEC	Endometrial Carcinoma	Uterine Endometrioid Carcinoma	T141A		OncoKB: NA;CIViC: NA;MyCancerGenome: not present;CancerHotspot: no;3DHotspot: no	MutationAssessor: NA;SIFT: impact: deleterious, score: 0;Polyphen-2: impact: possibly_damaging, score: 0.497	MutationAssessor: NA	SIFT: NA	Polyphen-2: NA		Missense_Mutation	SNP	Diploid
PSMB3	Uterine Corpus Endometrial Carcinoma (TCGA, PanCancer Atlas)	TCGA-DI-A1BU-01	UCEC	Endometrial Carcinoma	Uterine Mixed Endometrial Carcinoma	T141A		OncoKB: NA;CIViC: NA;MyCancerGenome: not present;CancerHotspot: no;3DHotspot: no	MutationAssessor: NA;SIFT: impact: deleterious, score: 0;Polyphen-2: impact: possibly_damaging, score: 0.497	MutationAssessor: NA	SIFT: NA	Polyphen-2: NA		Missense_Mutation	SNP	Diploid
PSMB3	Uterine Corpus Endometrial Carcinoma (TCGA, PanCancer Atlas)	TCGA-A5-A0G2-01	UCEC	Endometrial Carcinoma	Uterine Serous Carcinoma/Uterine Papillary Serous Carcinoma	A32T		OncoKB: NA;CIViC: NA;MyCancerGenome: not present;CancerHotspot: no;3DHotspot: no	MutationAssessor: NA;SIFT: impact: tolerated, score: 0.39;Polyphen-2: impact: benign, score: 0.156	MutationAssessor: NA	SIFT: NA	Polyphen-2: NA		Missense_Mutation	SNP	Diploid
PSMB3	Uterine Corpus Endometrial Carcinoma (TCGA, PanCancer Atlas)	TCGA-AX-A2HC-01	UCEC	Endometrial Carcinoma	Uterine Endometrioid Carcinoma	E144K		OncoKB: NA;CIViC: NA;MyCancerGenome: not present;CancerHotspot: no;3DHotspot: no	MutationAssessor: NA;SIFT: impact: deleterious, score: 0.01;Polyphen-2: impact: benign, score: 0.068	MutationAssessor: NA	SIFT: NA	Polyphen-2: NA		Missense_Mutation	SNP	Diploid
PSMB3	Uterine Corpus Endometrial Carcinoma (TCGA, PanCancer Atlas)	TCGA-B5-A1MR-01	UCEC	Endometrial Carcinoma	Uterine Endometrioid Carcinoma	E144K		OncoKB: NA;CIViC: NA;MyCancerGenome: not present;CancerHotspot: no;3DHotspot: no	MutationAssessor: NA;SIFT: impact: deleterious, score: 0.01;Polyphen-2: impact: benign, score: 0.068	MutationAssessor: NA	SIFT: NA	Polyphen-2: NA		Missense_Mutation	SNP	Diploid
PSMB3	Uterine Corpus Endometrial Carcinoma (TCGA, PanCancer Atlas)	TCGA-B5-A11E-01	UCEC	Endometrial Carcinoma	Uterine Endometrioid Carcinoma	V35M		OncoKB: NA;CIViC: NA;MyCancerGenome: not present;CancerHotspot: no;3DHotspot: no	MutationAssessor: NA;SIFT: impact: deleterious, score: 0.02;Polyphen-2: impact: probably_damaging, score: 0.912	MutationAssessor: NA	SIFT: NA	Polyphen-2: NA		Missense_Mutation	SNP	Diploid
PSMB3	Uterine Corpus Endometrial Carcinoma (TCGA, PanCancer Atlas)	TCGA-EY-A3QX-01	UCEC	Endometrial Carcinoma	Uterine Serous Carcinoma/Uterine Papillary Serous Carcinoma	L87V		OncoKB: NA;CIViC: NA;MyCancerGenome: not present;CancerHotspot: no;3DHotspot: no	MutationAssessor: NA;SIFT: impact: tolerated, score: 0.05;Polyphen-2: impact: benign, score: 0.026	MutationAssessor: NA	SIFT: NA	Polyphen-2: NA		Missense_Mutation	SNP	ShallowDel
PSMB3	Esophageal Adenocarcinoma (TCGA, PanCancer Atlas)	TCGA-JY-A6FH-01	ESCA	Esophagogastric Adenocarcinoma	Esophageal Adenocarcinoma	R198W		OncoKB: NA;CIViC: NA;MyCancerGenome: not present;CancerHotspot: no;3DHotspot: no	MutationAssessor: NA;SIFT: impact: deleterious, score: 0;Polyphen-2: impact: probably_damaging, score: 0.994	MutationAssessor: NA	SIFT: NA	Polyphen-2: NA		Missense_Mutation	SNP	Diploid
PSMB3	Skin Cutaneous Melanoma (TCGA, PanCancer Atlas)	TCGA-DA-A1I1-06	SKCM	Melanoma	Cutaneous Melanoma	W154L		OncoKB: NA;CIViC: NA;MyCancerGenome: not present;CancerHotspot: no;3DHotspot: no	MutationAssessor: NA;SIFT: impact: deleterious, score: 0;Polyphen-2: impact: probably_damaging, score: 0.949	MutationAssessor: NA	SIFT: NA	Polyphen-2: NA		Missense_Mutation	SNP	Diploid
PSMB3	Skin Cutaneous Melanoma (TCGA, PanCancer Atlas)	TCGA-EE-A29G-06	SKCM	Melanoma	Cutaneous Melanoma	W154L		OncoKB: NA;CIViC: NA;MyCancerGenome: not present;CancerHotspot: no;3DHotspot: no	MutationAssessor: NA;SIFT: impact: deleterious, score: 0;Polyphen-2: impact: probably_damaging, score: 0.949	MutationAssessor: NA	SIFT: NA	Polyphen-2: NA		Missense_Mutation	SNP	Diploid
PSMB3	Skin Cutaneous Melanoma (TCGA, PanCancer Atlas)	TCGA-ER-A2NH-06	SKCM	Melanoma	Cutaneous Melanoma	W154L		OncoKB: NA;CIViC: NA;MyCancerGenome: not present;CancerHotspot: no;3DHotspot: no	MutationAssessor: NA;SIFT: impact: deleterious, score: 0;Polyphen-2: impact: probably_damaging, score: 0.949	MutationAssessor: NA	SIFT: NA	Polyphen-2: NA		Missense_Mutation	SNP	Diploid
PSMB3	Skin Cutaneous Melanoma (TCGA, PanCancer Atlas)	TCGA-EE-A2MQ-06	SKCM	Melanoma	Cutaneous Melanoma	P130H		OncoKB: NA;CIViC: NA;MyCancerGenome: not present;CancerHotspot: no;3DHotspot: no	MutationAssessor: NA;SIFT: impact: tolerated, score: 0.12;Polyphen-2: impact: possibly_damaging, score: 0.874	MutationAssessor: NA	SIFT: NA	Polyphen-2: NA		Missense_Mutation	SNP	ShallowDel
PSMB3	Skin Cutaneous Melanoma (TCGA, PanCancer Atlas)	TCGA-EE-A3AC-06	SKCM	Melanoma	Cutaneous Melanoma	I190=		OncoKB: NA;CIViC: NA;MyCancerGenome: not present;CancerHotspot: no;3DHotspot: no	MutationAssessor: NA;SIFT: NA;Polyphen-2: NA	MutationAssessor: NA	SIFT: NA	Polyphen-2: NA		Splice_Region	SNP	Gain
PSMB3	Skin Cutaneous Melanoma (TCGA, PanCancer Atlas)	TCGA-ER-A19B-06	SKCM	Melanoma	Cutaneous Melanoma	Q33H		OncoKB: NA;CIViC: NA;MyCancerGenome: not present;CancerHotspot: no;3DHotspot: no	MutationAssessor: NA;SIFT: impact: tolerated, score: 0.21;Polyphen-2: impact: benign, score: 0.34	MutationAssessor: NA	SIFT: NA	Polyphen-2: NA		Missense_Mutation	SNP	Diploid
PSMB3	Skin Cutaneous Melanoma (TCGA, PanCancer Atlas)	TCGA-ER-A19P-06	SKCM	Melanoma	Cutaneous Melanoma	E97*		OncoKB: NA;CIViC: NA;MyCancerGenome: not present;CancerHotspot: no;3DHotspot: no	MutationAssessor: NA;SIFT: NA;Polyphen-2: NA	MutationAssessor: NA	SIFT: NA	Polyphen-2: NA		Nonsense_Mutation	SNP	Diploid
PSMB3	Stomach Adenocarcinoma (TCGA, PanCancer Atlas)	TCGA-CG-5726-01	STAD	Esophagogastric Adenocarcinoma	Intestinal Type Stomach Adenocarcinoma	R66C		OncoKB: NA;CIViC: NA;MyCancerGenome: not present;CancerHotspot: no;3DHotspot: no	MutationAssessor: NA;SIFT: impact: tolerated, score: 0.06;Polyphen-2: impact: benign, score: 0.029	MutationAssessor: NA	SIFT: NA	Polyphen-2: NA		Missense_Mutation	SNP	Diploid
PSMB3	Stomach Adenocarcinoma (TCGA, PanCancer Atlas)	TCGA-VQ-AA6I-01	STAD	Esophagogastric Adenocarcinoma	Intestinal Type Stomach Adenocarcinoma	R66C		OncoKB: NA;CIViC: NA;MyCancerGenome: not present;CancerHotspot: no;3DHotspot: no	MutationAssessor: NA;SIFT: impact: tolerated, score: 0.06;Polyphen-2: impact: benign, score: 0.029	MutationAssessor: NA	SIFT: NA	Polyphen-2: NA		Missense_Mutation	SNP	Diploid
PSMB3	Stomach Adenocarcinoma (TCGA, PanCancer Atlas)	TCGA-HU-A4GQ-01	STAD	Esophagogastric Adenocarcinoma	Tubular Stomach Adenocarcinoma	G128S		OncoKB: NA;CIViC: NA;MyCancerGenome: not present;CancerHotspot: no;3DHotspot: no	MutationAssessor: NA;SIFT: impact: deleterious, score: 0;Polyphen-2: impact: probably_damaging, score: 0.959	MutationAssessor: NA	SIFT: NA	Polyphen-2: NA		Missense_Mutation	SNP	Diploid
PSMB3	Stomach Adenocarcinoma (TCGA, PanCancer Atlas)	TCGA-VQ-A8DL-01	STAD	Esophagogastric Adenocarcinoma	Tubular Stomach Adenocarcinoma	D47Pfs*12		OncoKB: NA;CIViC: NA;MyCancerGenome: not present;CancerHotspot: no;3DHotspot: no	MutationAssessor: NA;SIFT: NA;Polyphen-2: NA	MutationAssessor: NA	SIFT: NA	Polyphen-2: NA		Frame_Shift_Del	DEL	Amp
PSMB3	Breast Invasive Carcinoma (TCGA, PanCancer Atlas)	TCGA-EW-A2FV-01	BRCA	Invasive Breast Carcinoma	Breast Invasive Carcinoma (NOS)	D176Tfs*25		OncoKB: NA;CIViC: NA;MyCancerGenome: not present;CancerHotspot: no;3DHotspot: no	MutationAssessor: NA;SIFT: NA;Polyphen-2: NA	MutationAssessor: NA	SIFT: NA	Polyphen-2: NA		Frame_Shift_Del	DEL	ShallowDel
PSMB3	Colorectal Adenocarcinoma (TCGA, PanCancer Atlas)	TCGA-AG-A002-01	READ	Colorectal Adenocarcinoma	Rectal Adenocarcinoma	K17N		OncoKB: NA;CIViC: NA;MyCancerGenome: not present;CancerHotspot: no;3DHotspot: no	MutationAssessor: NA;SIFT: impact: tolerated, score: 0.07;Polyphen-2: impact: benign, score: 0.163	MutationAssessor: NA	SIFT: NA	Polyphen-2: NA		Missense_Mutation	SNP	Diploid
PSMB3	Colorectal Adenocarcinoma (TCGA, PanCancer Atlas)	TCGA-AD-6964-01	COAD	Colorectal Adenocarcinoma	Colon Adenocarcinoma	L172P		OncoKB: NA;CIViC: NA;MyCancerGenome: not present;CancerHotspot: no;3DHotspot: no	MutationAssessor: NA;SIFT: impact: deleterious, score: 0;Polyphen-2: impact: probably_damaging, score: 1	MutationAssessor: NA	SIFT: NA	Polyphen-2: NA		Missense_Mutation	SNP	Diploid
PSMB3	Colorectal Adenocarcinoma (TCGA, PanCancer Atlas)	TCGA-AZ-4315-01	COAD	Colorectal Adenocarcinoma	Colon Adenocarcinoma	Q61H		OncoKB: NA;CIViC: NA;MyCancerGenome: not present;CancerHotspot: no;3DHotspot: no	MutationAssessor: NA;SIFT: impact: tolerated, score: 0.22;Polyphen-2: impact: probably_damaging, score: 0.963	MutationAssessor: NA	SIFT: NA	Polyphen-2: NA		Missense_Mutation	SNP	Diploid
PSMB3	Colorectal Adenocarcinoma (TCGA, PanCancer Atlas)	TCGA-CK-4951-01	COAD	Colorectal Adenocarcinoma	Mucinous Adenocarcinoma of the Colon and Rectum	V20M		OncoKB: NA;CIViC: NA;MyCancerGenome: not present;CancerHotspot: no;3DHotspot: no	MutationAssessor: NA;SIFT: impact: deleterious, score: 0.02;Polyphen-2: impact: possibly_damaging, score: 0.812	MutationAssessor: NA	SIFT: NA	Polyphen-2: NA		Missense_Mutation	SNP	Diploid
PSMB3	Head and Neck Squamous Cell Carcinoma (TCGA, PanCancer Atlas)	TCGA-F7-A624-01	HNSC	Head and Neck Squamous Cell Carcinoma	Head and Neck Squamous Cell Carcinoma	E75V		OncoKB: NA;CIViC: NA;MyCancerGenome: not present;CancerHotspot: no;3DHotspot: no	MutationAssessor: NA;SIFT: impact: deleterious, score: 0.01;Polyphen-2: impact: possibly_damaging, score: 0.521	MutationAssessor: NA	SIFT: NA	Polyphen-2: NA		Missense_Mutation	SNP	Diploid
PSMB4	Brain Lower Grade Glioma (TCGA, PanCancer Atlas)	TCGA-DU-6392-01	LGG	Diffuse Glioma	Astrocytoma	R86H		OncoKB: NA;CIViC: NA;MyCancerGenome: not present;CancerHotspot: no;3DHotspot: no	MutationAssessor: NA;SIFT: NA;Polyphen-2: NA	MutationAssessor: NA	SIFT: NA	Polyphen-2: NA		Missense_Mutation	SNP	Gain
PSMB4	Ovarian Serous Cystadenocarcinoma (TCGA, PanCancer Atlas)	TCGA-10-0933-01	OV	Ovarian Epithelial Tumor	Serous Ovarian Cancer	R89L		OncoKB: NA;CIViC: NA;MyCancerGenome: not present;CancerHotspot: no;3DHotspot: no	MutationAssessor: NA;SIFT: NA;Polyphen-2: NA	MutationAssessor: NA	SIFT: NA	Polyphen-2: NA		Missense_Mutation	SNP	Gain
PSMB4	Ovarian Serous Cystadenocarcinoma (TCGA, PanCancer Atlas)	TCGA-09-2044-01	OV	Ovarian Epithelial Tumor	Serous Ovarian Cancer	P34Q		OncoKB: NA;CIViC: NA;MyCancerGenome: not present;CancerHotspot: no;3DHotspot: no	MutationAssessor: NA;SIFT: NA;Polyphen-2: NA	MutationAssessor: NA	SIFT: NA	Polyphen-2: NA		Missense_Mutation	SNP	ShallowDel
PSMB4	Ovarian Serous Cystadenocarcinoma (TCGA, PanCancer Atlas)	TCGA-29-1763-01	OV	Ovarian Epithelial Tumor	Serous Ovarian Cancer	Q20H		OncoKB: NA;CIViC: NA;MyCancerGenome: not present;CancerHotspot: no;3DHotspot: no	MutationAssessor: NA;SIFT: NA;Polyphen-2: NA	MutationAssessor: NA	SIFT: NA	Polyphen-2: NA		Missense_Mutation	SNP	Gain
PSMB4	Glioblastoma Multiforme (TCGA, PanCancer Atlas)	TCGA-4W-AA9R-01	GBM	Glioblastoma	Glioblastoma Multiforme	V198I		OncoKB: NA;CIViC: NA;MyCancerGenome: not present;CancerHotspot: no;3DHotspot: no	MutationAssessor: NA;SIFT: NA;Polyphen-2: NA	MutationAssessor: NA	SIFT: impact: tolerated_low_confidence, score: 0.25	Polyphen-2: impact: benign	0.25	Missense_Mutation	SNP	Diploid
PSMB4	Glioblastoma Multiforme (TCGA, PanCancer Atlas)	TCGA-06-5416-01	GBM	Glioblastoma	Glioblastoma Multiforme	F4L		OncoKB: NA;CIViC: NA;MyCancerGenome: not present;CancerHotspot: no;3DHotspot: no	MutationAssessor: NA;SIFT: NA;Polyphen-2: NA	MutationAssessor: NA	SIFT: impact: deleterious_low_confidence, score: 0	Polyphen-2: impact: possibly_damaging	0.88	Missense_Mutation	SNP	Diploid
PSMB4	Lung Squamous Cell Carcinoma (TCGA, PanCancer Atlas)	TCGA-43-7656-01	LUSC	Non-Small Cell Lung Cancer	Lung Squamous Cell Carcinoma	M88R		OncoKB: NA;CIViC: NA;MyCancerGenome: not present;CancerHotspot: no;3DHotspot: no	MutationAssessor: NA;SIFT: NA;Polyphen-2: NA	MutationAssessor: NA	SIFT: impact: tolerated_low_confidence, score: 0.25	Polyphen-2: impact: benign	0.01	Missense_Mutation	SNP	Diploid
PSMB4	Lung Squamous Cell Carcinoma (TCGA, PanCancer Atlas)	TCGA-46-3765-01	LUSC	Non-Small Cell Lung Cancer	Lung Squamous Cell Carcinoma	S9F		OncoKB: NA;CIViC: NA;MyCancerGenome: not present;CancerHotspot: no;3DHotspot: no	MutationAssessor: NA;SIFT: NA;Polyphen-2: NA	MutationAssessor: NA	SIFT: impact: tolerated_low_confidence, score: 0.27	Polyphen-2: impact: possibly_damaging	0.62	Missense_Mutation	SNP	Diploid
PSMB4	Lung Squamous Cell Carcinoma (TCGA, PanCancer Atlas)	TCGA-63-A5MS-01	LUSC	Non-Small Cell Lung Cancer	Lung Squamous Cell Carcinoma	R82Afs*23		OncoKB: NA;CIViC: NA;MyCancerGenome: not present;CancerHotspot: no;3DHotspot: no	MutationAssessor: NA;SIFT: NA;Polyphen-2: NA	MutationAssessor: NA	SIFT: impact: deleterious_low_confidence, score: 0.01	Polyphen-2: impact: benign	0.01	Frame_Shift_Del	DEL	Gain
PSMB4	Lung Squamous Cell Carcinoma (TCGA, PanCancer Atlas)	TCGA-85-6560-01	LUSC	Non-Small Cell Lung Cancer	Lung Squamous Cell Carcinoma	S55L		OncoKB: NA;CIViC: NA;MyCancerGenome: not present;CancerHotspot: no;3DHotspot: no	MutationAssessor: NA;SIFT: NA;Polyphen-2: NA	MutationAssessor: NA	SIFT: impact: deleterious_low_confidence, score: 0.01	Polyphen-2: impact: probably_damaging	1	Missense_Mutation	SNP	Gain
PSMB4	Bladder Urothelial Carcinoma (TCGA, PanCancer Atlas)	TCGA-DK-A1AC-01	BLCA	Bladder Urothelial Carcinoma	Bladder Urothelial Carcinoma	D101N		OncoKB: NA;CIViC: NA;MyCancerGenome: not present;CancerHotspot: no;3DHotspot: no	MutationAssessor: NA;SIFT: NA;Polyphen-2: NA	MutationAssessor: NA	SIFT: NA	Polyphen-2: NA		Missense_Mutation	SNP	Amp
PSMB4	Bladder Urothelial Carcinoma (TCGA, PanCancer Atlas)	TCGA-GC-A4ZW-01	BLCA	Bladder Urothelial Carcinoma	Bladder Urothelial Carcinoma	S26C		OncoKB: NA;CIViC: NA;MyCancerGenome: not present;CancerHotspot: no;3DHotspot: no	MutationAssessor: NA;SIFT: NA;Polyphen-2: NA	MutationAssessor: NA	SIFT: NA	Polyphen-2: NA		Missense_Mutation	SNP	Gain
PSMB4	Kidney Renal Clear Cell Carcinoma (TCGA, PanCancer Atlas)	TCGA-B0-5088-01	KIRC	Renal Clear Cell Carcinoma	Renal Clear Cell Carcinoma	H126Tfs*4		OncoKB: NA;CIViC: NA;MyCancerGenome: not present;CancerHotspot: no;3DHotspot: no	MutationAssessor: NA;SIFT: NA;Polyphen-2: NA	MutationAssessor: NA	SIFT: NA	Polyphen-2: NA		Frame_Shift_Ins	INS	Diploid
PSMB4	Uterine Corpus Endometrial Carcinoma (TCGA, PanCancer Atlas)	TCGA-A5-A2K5-01	UCEC	Endometrial Carcinoma	Uterine Endometrioid Carcinoma	L112I		OncoKB: NA;CIViC: NA;MyCancerGenome: not present;CancerHotspot: no;3DHotspot: no	MutationAssessor: NA;SIFT: NA;Polyphen-2: NA	MutationAssessor: NA	SIFT: NA	Polyphen-2: NA		Missense_Mutation	SNP	Diploid
PSMB4	Uterine Corpus Endometrial Carcinoma (TCGA, PanCancer Atlas)	TCGA-BS-A0TC-01	UCEC	Endometrial Carcinoma	Uterine Endometrioid Carcinoma	V65L		OncoKB: NA;CIViC: NA;MyCancerGenome: not present;CancerHotspot: no;3DHotspot: no	MutationAssessor: NA;SIFT: NA;Polyphen-2: NA	MutationAssessor: NA	SIFT: NA	Polyphen-2: NA		Missense_Mutation	SNP	Diploid
PSMB4	Uterine Corpus Endometrial Carcinoma (TCGA, PanCancer Atlas)	TCGA-A5-A0G2-01	UCEC	Endometrial Carcinoma	Uterine Serous Carcinoma/Uterine Papillary Serous Carcinoma	M172I		OncoKB: NA;CIViC: NA;MyCancerGenome: not present;CancerHotspot: no;3DHotspot: no	MutationAssessor: NA;SIFT: NA;Polyphen-2: NA	MutationAssessor: NA	SIFT: impact: deleterious_low_confidence, score: 0.02	Polyphen-2: impact: probably_damaging	0.99	Missense_Mutation	SNP	Gain
PSMB4	Uterine Corpus Endometrial Carcinoma (TCGA, PanCancer Atlas)	TCGA-A5-A0G2-01	UCEC	Endometrial Carcinoma	Uterine Serous Carcinoma/Uterine Papillary Serous Carcinoma	A235T		OncoKB: NA;CIViC: NA;MyCancerGenome: not present;CancerHotspot: no;3DHotspot: no	MutationAssessor: NA;SIFT: NA;Polyphen-2: NA	MutationAssessor: NA	SIFT: impact: tolerated_low_confidence, score: 0.18	Polyphen-2: impact: probably_damaging	0.99	Missense_Mutation	SNP	Gain
PSMB4	Uterine Corpus Endometrial Carcinoma (TCGA, PanCancer Atlas)	TCGA-E6-A1LX-01	UCEC	Endometrial Carcinoma	Uterine Endometrioid Carcinoma	A235T		OncoKB: NA;CIViC: NA;MyCancerGenome: not present;CancerHotspot: no;3DHotspot: no	MutationAssessor: NA;SIFT: NA;Polyphen-2: NA	MutationAssessor: NA	SIFT: NA	Polyphen-2: NA		Missense_Mutation	SNP	Diploid
PSMB4	Uterine Corpus Endometrial Carcinoma (TCGA, PanCancer Atlas)	TCGA-A5-A1OF-01	UCEC	Endometrial Carcinoma	Uterine Mixed Endometrial Carcinoma	D212N		OncoKB: NA;CIViC: NA;MyCancerGenome: not present;CancerHotspot: no;3DHotspot: no	MutationAssessor: NA;SIFT: NA;Polyphen-2: NA	MutationAssessor: NA	SIFT: impact: deleterious_low_confidence, score: 0.02	Polyphen-2: impact: benign	0.01	Missense_Mutation	SNP	Diploid
PSMB4	Uterine Corpus Endometrial Carcinoma (TCGA, PanCancer Atlas)	TCGA-AP-A0LM-01	UCEC	Endometrial Carcinoma	Uterine Endometrioid Carcinoma	G19V		OncoKB: NA;CIViC: NA;MyCancerGenome: not present;CancerHotspot: no;3DHotspot: no	MutationAssessor: NA;SIFT: NA;Polyphen-2: NA	MutationAssessor: NA	SIFT: impact: deleterious_low_confidence, score: 0	Polyphen-2: impact: probably_damaging	0.99	Missense_Mutation	SNP	Diploid
PSMB4	Uterine Corpus Endometrial Carcinoma (TCGA, PanCancer Atlas)	TCGA-DI-A1NO-01	UCEC	Endometrial Carcinoma	Uterine Endometrioid Carcinoma	T238N		OncoKB: NA;CIViC: NA;MyCancerGenome: not present;CancerHotspot: no;3DHotspot: no	MutationAssessor: NA;SIFT: NA;Polyphen-2: NA	MutationAssessor: NA	SIFT: NA	Polyphen-2: NA		Missense_Mutation	SNP	Gain
PSMB4	Skin Cutaneous Melanoma (TCGA, PanCancer Atlas)	TCGA-EB-A6QY-01	SKCM	Melanoma	Cutaneous Melanoma	S30F		OncoKB: NA;CIViC: NA;MyCancerGenome: not present;CancerHotspot: no;3DHotspot: no	MutationAssessor: NA;SIFT: NA;Polyphen-2: NA	MutationAssessor: NA	SIFT: NA	Polyphen-2: NA		Missense_Mutation	SNP
PSMB4	Skin Cutaneous Melanoma (TCGA, PanCancer Atlas)	TCGA-EE-A2A0-06	SKCM	Melanoma	Cutaneous Melanoma	S30F		OncoKB: NA;CIViC: NA;MyCancerGenome: not present;CancerHotspot: no;3DHotspot: no	MutationAssessor: NA;SIFT: NA;Polyphen-2: NA	MutationAssessor: NA	SIFT: impact: tolerated_low_confidence, score: 0.06	Polyphen-2: impact: probably_damaging	0.99	Missense_Mutation	SNP	Diploid
PSMB4	Stomach Adenocarcinoma (TCGA, PanCancer Atlas)	TCGA-BR-8680-01	STAD	Esophagogastric Adenocarcinoma	Tubular Stomach Adenocarcinoma	L112I		OncoKB: NA;CIViC: NA;MyCancerGenome: not present;CancerHotspot: no;3DHotspot: no	MutationAssessor: NA;SIFT: NA;Polyphen-2: NA	MutationAssessor: NA	SIFT: NA	Polyphen-2: NA		Missense_Mutation	SNP	Gain
PSMB4	Stomach Adenocarcinoma (TCGA, PanCancer Atlas)	TCGA-BR-8591-01	STAD	Esophagogastric Adenocarcinoma	Stomach Adenocarcinoma	S146L		OncoKB: NA;CIViC: NA;MyCancerGenome: not present;CancerHotspot: no;3DHotspot: no	MutationAssessor: NA;SIFT: NA;Polyphen-2: NA	MutationAssessor: NA	SIFT: NA	Polyphen-2: NA		Missense_Mutation	SNP	Diploid
PSMB4	Stomach Adenocarcinoma (TCGA, PanCancer Atlas)	TCGA-F1-6177-01	STAD	Esophagogastric Adenocarcinoma	Stomach Adenocarcinoma	S261G		OncoKB: NA;CIViC: NA;MyCancerGenome: not present;CancerHotspot: no;3DHotspot: no	MutationAssessor: NA;SIFT: NA;Polyphen-2: NA	MutationAssessor: NA	SIFT: NA	Polyphen-2: NA		Missense_Mutation	SNP	Diploid
PSMB4	Breast Invasive Carcinoma (TCGA, PanCancer Atlas)	TCGA-BH-A0HP-01	BRCA	Invasive Breast Carcinoma	Breast Invasive Lobular Carcinoma	P42A		OncoKB: NA;CIViC: NA;MyCancerGenome: not present;CancerHotspot: no;3DHotspot: no	MutationAssessor: NA;SIFT: NA;Polyphen-2: NA	MutationAssessor: NA	SIFT: NA	Polyphen-2: NA		Missense_Mutation	SNP	Gain
PSMB4	Colorectal Adenocarcinoma (TCGA, PanCancer Atlas)	TCGA-5M-AAT4-01	COAD	Colorectal Adenocarcinoma	Colon Adenocarcinoma	R211H		OncoKB: NA;CIViC: NA;MyCancerGenome: not present;CancerHotspot: no;3DHotspot: no	MutationAssessor: NA;SIFT: NA;Polyphen-2: NA	MutationAssessor: NA	SIFT: NA	Polyphen-2: NA		Missense_Mutation	SNP	Diploid
PSMB4	Colorectal Adenocarcinoma (TCGA, PanCancer Atlas)	TCGA-CK-6746-01	COAD	Colorectal Adenocarcinoma	Colon Adenocarcinoma	T46A		OncoKB: NA;CIViC: NA;MyCancerGenome: not present;CancerHotspot: no;3DHotspot: no	MutationAssessor: NA;SIFT: NA;Polyphen-2: NA	MutationAssessor: NA	SIFT: NA	Polyphen-2: NA		Missense_Mutation	SNP	Diploid
PSMB4	Colorectal Adenocarcinoma (TCGA, PanCancer Atlas)	TCGA-G4-6302-01	COAD	Colorectal Adenocarcinoma	Mucinous Adenocarcinoma of the Colon and Rectum	R145H		OncoKB: NA;CIViC: NA;MyCancerGenome: not present;CancerHotspot: no;3DHotspot: no	MutationAssessor: NA;SIFT: NA;Polyphen-2: NA	MutationAssessor: NA	SIFT: NA	Polyphen-2: NA		Missense_Mutation	SNP	Diploid
PSMB4	Head and Neck Squamous Cell Carcinoma (TCGA, PanCancer Atlas)	TCGA-CV-7407-01	HNSC	Head and Neck Squamous Cell Carcinoma	Head and Neck Squamous Cell Carcinoma	C217*		OncoKB: NA;CIViC: NA;MyCancerGenome: not present;CancerHotspot: no;3DHotspot: no	MutationAssessor: NA;SIFT: NA;Polyphen-2: NA	MutationAssessor: NA	SIFT: NA	Polyphen-2: NA		Nonsense_Mutation	SNP	Gain
PSMB4	Head and Neck Squamous Cell Carcinoma (TCGA, PanCancer Atlas)	TCGA-CR-7382-01	HNSC	Head and Neck Squamous Cell Carcinoma	Head and Neck Squamous Cell Carcinoma	A183V		OncoKB: NA;CIViC: NA;MyCancerGenome: not present;CancerHotspot: no;3DHotspot: no	MutationAssessor: NA;SIFT: NA;Polyphen-2: NA	MutationAssessor: NA	SIFT: NA	Polyphen-2: NA		Missense_Mutation	SNP	Diploid
PSMB4	Cervical Squamous Cell Carcinoma (TCGA, PanCancer Atlas)	TCGA-2W-A8YY-01	CESC	Cervical Squamous Cell Carcinoma	Cervical Squamous Cell Carcinoma	R89*		OncoKB: NA;CIViC: NA;MyCancerGenome: not present;CancerHotspot: no;3DHotspot: no	MutationAssessor: NA;SIFT: NA;Polyphen-2: NA	MutationAssessor: NA	SIFT: impact: tolerated_low_confidence, score: 0.05	Polyphen-2: impact: benign	0.23	Nonsense_Mutation	SNP	Diploid
PSMB4	Sarcoma (TCGA, PanCancer Atlas)	TCGA-K1-A6RT-01	SARC	Sarcoma	Leiomyosarcoma	VPS45-PSMB4		OncoKB: NA;CIViC: NA;MyCancerGenome: not present;CancerHotspot: no;3DHotspot: no	MutationAssessor: NA;SIFT: NA;Polyphen-2: NA	MutationAssessor: NA	SIFT: NA	Polyphen-2: NA		fusion	FUSION	Diploid
PSMB5	Uterine Corpus Endometrial Carcinoma (TCGA, PanCancer Atlas)	TCGA-AX-A2H4-01	UCEC	Endometrial Carcinoma	Uterine Serous Carcinoma/Uterine Papillary Serous Carcinoma	PSMB5-HOMEZ		OncoKB: Unknown, level NA, resistance NA;CIViC: NA;MyCancerGenome: not present;CancerHotspot: no;3DHotspot: no	MutationAssessor: NA;SIFT: NA;Polyphen-2: NA	MutationAssessor: NA	SIFT: NA	Polyphen-2: NA		fusion	FUSION	Gain
PSMB5	Adrenocortical Carcinoma (TCGA, PanCancer Atlas)	TCGA-PK-A5HB-01	ACC	Adrenocortical Carcinoma	Adrenocortical Carcinoma	P10L		OncoKB: NA;CIViC: NA;MyCancerGenome: not present;CancerHotspot: no;3DHotspot: no	MutationAssessor: NA;SIFT: impact: tolerated_low_confidence, score: 0.25;Polyphen-2: impact: benign, score: 0.254	MutationAssessor: NA	SIFT: NA	Polyphen-2: NA		Missense_Mutation	SNP	Diploid
PSMB5	Ovarian Serous Cystadenocarcinoma (TCGA, PanCancer Atlas)	TCGA-24-0982-01	OV	Ovarian Epithelial Tumor	Serous Ovarian Cancer	L11Q		OncoKB: NA;CIViC: NA;MyCancerGenome: not present;CancerHotspot: no;3DHotspot: no	MutationAssessor: NA;SIFT: impact: deleterious_low_confidence, score: 0;Polyphen-2: impact: possibly_damaging, score: 0.884	MutationAssessor: NA	SIFT: NA	Polyphen-2: NA		Missense_Mutation	SNP	ShallowDel
PSMB5	Ovarian Serous Cystadenocarcinoma (TCGA, PanCancer Atlas)	TCGA-13-0903-01	OV	Ovarian Epithelial Tumor	Serous Ovarian Cancer	P32L		OncoKB: NA;CIViC: NA;MyCancerGenome: not present;CancerHotspot: no;3DHotspot: no	MutationAssessor: NA;SIFT: impact: tolerated_low_confidence, score: 0.25;Polyphen-2: impact: benign, score: 0.013	MutationAssessor: NA	SIFT: impact: deleterious_low_confidence, score: 0.04	Polyphen-2: impact: probably_damaging	0.99	Missense_Mutation	SNP	Diploid
PSMB5	Ovarian Serous Cystadenocarcinoma (TCGA, PanCancer Atlas)	TCGA-13-0903-01	OV	Ovarian Epithelial Tumor	Serous Ovarian Cancer	P32S		OncoKB: NA;CIViC: NA;MyCancerGenome: not present;CancerHotspot: no;3DHotspot: no	MutationAssessor: NA;SIFT: impact: tolerated_low_confidence, score: 0.27;Polyphen-2: impact: possibly_damaging, score: 0.623	MutationAssessor: NA	SIFT: impact: tolerated_low_confidence, score: 0.47	Polyphen-2: impact: benign	0.24	Missense_Mutation	SNP	Diploid
PSMB5	Ovarian Serous Cystadenocarcinoma (TCGA, PanCancer Atlas)	TCGA-13-0903-01	OV	Ovarian Epithelial Tumor	Serous Ovarian Cancer	P12L		OncoKB: NA;CIViC: NA;MyCancerGenome: not present;CancerHotspot: no;3DHotspot: no	MutationAssessor: NA;SIFT: impact: deleterious_low_confidence, score: 0.01;Polyphen-2: impact: benign, score: 0.007	MutationAssessor: NA	SIFT: NA	Polyphen-2: NA		Missense_Mutation	SNP	Diploid
PSMB5	Diffuse Large B-Cell Lymphoma (TCGA, PanCancer Atlas)	TCGA-FA-A6HN-01	DLBC	Mature B-Cell Neoplasms	Diffuse Large B-Cell Lymphoma, NOS	G17V		OncoKB: NA;CIViC: NA;MyCancerGenome: not present;CancerHotspot: no;3DHotspot: no	MutationAssessor: NA;SIFT: impact: deleterious_low_confidence, score: 0.01;Polyphen-2: impact: probably_damaging, score: 0.999	MutationAssessor: NA	SIFT: NA	Polyphen-2: NA		Missense_Mutation	SNP	Diploid
PSMB5	Lung Squamous Cell Carcinoma (TCGA, PanCancer Atlas)	TCGA-98-8023-01	LUSC	Non-Small Cell Lung Cancer	Lung Squamous Cell Carcinoma	Q148*		OncoKB: NA;CIViC: NA;MyCancerGenome: not present;CancerHotspot: no;3DHotspot: no	MutationAssessor: NA;SIFT: NA;Polyphen-2: NA	MutationAssessor: NA	SIFT: NA	Polyphen-2: NA		Nonsense_Mutation	SNP	ShallowDel
PSMB5	Lung Squamous Cell Carcinoma (TCGA, PanCancer Atlas)	TCGA-60-2726-01	LUSC	Non-Small Cell Lung Cancer	Lung Squamous Cell Carcinoma	M159I		OncoKB: NA;CIViC: NA;MyCancerGenome: not present;CancerHotspot: no;3DHotspot: no	MutationAssessor: NA;SIFT: NA;Polyphen-2: NA	MutationAssessor: NA	SIFT: NA	Polyphen-2: NA		Missense_Mutation	SNP	Gain
PSMB5	Bladder Urothelial Carcinoma (TCGA, PanCancer Atlas)	TCGA-FD-A6TG-01	BLCA	Bladder Urothelial Carcinoma	Bladder Urothelial Carcinoma	R245P		OncoKB: NA;CIViC: NA;MyCancerGenome: not present;CancerHotspot: no;3DHotspot: no	MutationAssessor: NA;SIFT: NA;Polyphen-2: NA	MutationAssessor: NA	SIFT: NA	Polyphen-2: NA		Missense_Mutation	SNP	ShallowDel
PSMB5	Bladder Urothelial Carcinoma (TCGA, PanCancer Atlas)	TCGA-G2-A2EF-01	BLCA	Bladder Urothelial Carcinoma	Bladder Urothelial Carcinoma	D76H		OncoKB: NA;CIViC: NA;MyCancerGenome: not present;CancerHotspot: no;3DHotspot: no	MutationAssessor: NA;SIFT: NA;Polyphen-2: NA	MutationAssessor: NA	SIFT: NA	Polyphen-2: NA		Missense_Mutation	SNP	ShallowDel
PSMB5	Liver Hepatocellular Carcinoma (TCGA, PanCancer Atlas)	TCGA-UB-A7MD-01	LIHC	Hepatocellular Carcinoma	Hepatocellular Carcinoma	Y212C		OncoKB: NA;CIViC: NA;MyCancerGenome: not present;CancerHotspot: no;3DHotspot: no	MutationAssessor: NA;SIFT: NA;Polyphen-2: NA	MutationAssessor: NA	SIFT: NA	Polyphen-2: NA		Missense_Mutation	SNP	Diploid
PSMB5	Liver Hepatocellular Carcinoma (TCGA, PanCancer Atlas)	TCGA-2V-A95S-01	LIHC	Hepatocellular Carcinoma	Hepatocellular Carcinoma	E8G		OncoKB: NA;CIViC: NA;MyCancerGenome: not present;CancerHotspot: no;3DHotspot: no	MutationAssessor: NA;SIFT: impact: deleterious_low_confidence, score: 0.02;Polyphen-2: impact: probably_damaging, score: 0.986	MutationAssessor: NA	SIFT: NA	Polyphen-2: NA		Missense_Mutation	SNP	Diploid
PSMB5	Liver Hepatocellular Carcinoma (TCGA, PanCancer Atlas)	TCGA-DD-AADN-01	LIHC	Hepatocellular Carcinoma	Hepatocellular Carcinoma	P52S		OncoKB: NA;CIViC: NA;MyCancerGenome: not present;CancerHotspot: no;3DHotspot: no	MutationAssessor: NA;SIFT: impact: tolerated_low_confidence, score: 0.18;Polyphen-2: impact: probably_damaging, score: 0.994	MutationAssessor: NA	SIFT: NA	Polyphen-2: NA		Missense_Mutation	SNP	Gain
PSMB5	Liver Hepatocellular Carcinoma (TCGA, PanCancer Atlas)	TCGA-FV-A3R3-01	LIHC	Hepatocellular Carcinoma	Hepatocellular Carcinoma	M145V		OncoKB: NA;CIViC: NA;MyCancerGenome: not present;CancerHotspot: no;3DHotspot: no	MutationAssessor: NA;SIFT: NA;Polyphen-2: NA	MutationAssessor: NA	SIFT: NA	Polyphen-2: NA		Missense_Mutation	SNP	Diploid
PSMB5	Prostate Adenocarcinoma (TCGA, PanCancer Atlas)	TCGA-XK-AAIW-01	PRAD	Prostate Adenocarcinoma	Prostate Adenocarcinoma	T62A		OncoKB: NA;CIViC: NA;MyCancerGenome: not present;CancerHotspot: no;3DHotspot: no	MutationAssessor: NA;SIFT: impact: deleterious_low_confidence, score: 0.02;Polyphen-2: impact: benign, score: 0.013	MutationAssessor: NA	SIFT: NA	Polyphen-2: NA		Missense_Mutation	SNP	Diploid
PSMB5	Kidney Renal Clear Cell Carcinoma (TCGA, PanCancer Atlas)	TCGA-A3-3387-01	KIRC	Renal Clear Cell Carcinoma	Renal Clear Cell Carcinoma	S5R		OncoKB: NA;CIViC: NA;MyCancerGenome: not present;CancerHotspot: no;3DHotspot: no	MutationAssessor: NA;SIFT: impact: deleterious_low_confidence, score: 0;Polyphen-2: impact: probably_damaging, score: 0.994	MutationAssessor: NA	SIFT: NA	Polyphen-2: NA		Missense_Mutation	SNP	ShallowDel
PSMB5	Uterine Corpus Endometrial Carcinoma (TCGA, PanCancer Atlas)	TCGA-AX-A2HC-01	UCEC	Endometrial Carcinoma	Uterine Endometrioid Carcinoma	R123Q		OncoKB: NA;CIViC: NA;MyCancerGenome: not present;CancerHotspot: no;3DHotspot: no	MutationAssessor: NA;SIFT: NA;Polyphen-2: NA	MutationAssessor: NA	SIFT: NA	Polyphen-2: NA		Missense_Mutation	SNP	Diploid
PSMB5	Uterine Corpus Endometrial Carcinoma (TCGA, PanCancer Atlas)	TCGA-BS-A0UV-01	UCEC	Endometrial Carcinoma	Uterine Endometrioid Carcinoma	N129D		OncoKB: NA;CIViC: NA;MyCancerGenome: not present;CancerHotspot: no;3DHotspot: no	MutationAssessor: NA;SIFT: NA;Polyphen-2: NA	MutationAssessor: NA	SIFT: impact: deleterious, score: 0	Polyphen-2: impact: probably_damaging	1	Missense_Mutation	SNP	Diploid
PSMB5	Uterine Corpus Endometrial Carcinoma (TCGA, PanCancer Atlas)	TCGA-D1-A17Q-01	UCEC	Endometrial Carcinoma	Uterine Endometrioid Carcinoma	D29N		OncoKB: NA;CIViC: NA;MyCancerGenome: not present;CancerHotspot: no;3DHotspot: no	MutationAssessor: NA;SIFT: impact: tolerated_low_confidence, score: 0.06;Polyphen-2: impact: probably_damaging, score: 0.991	MutationAssessor: NA	SIFT: impact: deleterious, score: 0	Polyphen-2: impact: probably_damaging	0.95	Missense_Mutation	SNP	Diploid
PSMB5	Uterine Corpus Endometrial Carcinoma (TCGA, PanCancer Atlas)	TCGA-EO-A22R-01	UCEC	Endometrial Carcinoma	Uterine Endometrioid Carcinoma	R200W		OncoKB: NA;CIViC: NA;MyCancerGenome: not present;CancerHotspot: no;3DHotspot: no	MutationAssessor: NA;SIFT: NA;Polyphen-2: NA	MutationAssessor: NA	SIFT: impact: deleterious, score: 0.02	Polyphen-2: impact: possibly_damaging	0.9	Missense_Mutation	SNP	Diploid
PSMB5	Uterine Corpus Endometrial Carcinoma (TCGA, PanCancer Atlas)	TCGA-EO-A22U-01	UCEC	Endometrial Carcinoma	Uterine Endometrioid Carcinoma	R200W		OncoKB: NA;CIViC: NA;MyCancerGenome: not present;CancerHotspot: no;3DHotspot: no	MutationAssessor: NA;SIFT: NA;Polyphen-2: NA	MutationAssessor: NA	SIFT: impact: deleterious, score: 0	Polyphen-2: impact: probably_damaging	1	Missense_Mutation	SNP	Diploid
PSMB5	Uterine Corpus Endometrial Carcinoma (TCGA, PanCancer Atlas)	TCGA-AX-A2HC-01	UCEC	Endometrial Carcinoma	Uterine Endometrioid Carcinoma	R216H		OncoKB: NA;CIViC: NA;MyCancerGenome: not present;CancerHotspot: no;3DHotspot: no	MutationAssessor: NA;SIFT: NA;Polyphen-2: NA	MutationAssessor: NA	SIFT: impact: deleterious, score: 0	Polyphen-2: impact: probably_damaging	1	Missense_Mutation	SNP	Diploid
PSMB5	Uterine Corpus Endometrial Carcinoma (TCGA, PanCancer Atlas)	TCGA-A5-A2K3-01	UCEC	Endometrial Carcinoma	Uterine Serous Carcinoma/Uterine Papillary Serous Carcinoma	K165E		OncoKB: NA;CIViC: NA;MyCancerGenome: not present;CancerHotspot: no;3DHotspot: no	MutationAssessor: NA;SIFT: NA;Polyphen-2: NA	MutationAssessor: NA	SIFT: impact: deleterious_low_confidence, score: 0	Polyphen-2: impact: benign	0	Missense_Mutation	SNP	Diploid
PSMB5	Uterine Corpus Endometrial Carcinoma (TCGA, PanCancer Atlas)	TCGA-AP-A1E3-01	UCEC	Endometrial Carcinoma	Uterine Endometrioid Carcinoma	R239Q		OncoKB: NA;CIViC: NA;MyCancerGenome: not present;CancerHotspot: no;3DHotspot: no	MutationAssessor: NA;SIFT: NA;Polyphen-2: NA	MutationAssessor: NA	SIFT: impact: deleterious, score: 0.01	Polyphen-2: impact: benign	0.27	Missense_Mutation	SNP	Diploid
PSMB5	Uterine Corpus Endometrial Carcinoma (TCGA, PanCancer Atlas)	TCGA-AX-A2HC-01	UCEC	Endometrial Carcinoma	Uterine Endometrioid Carcinoma	R68C		OncoKB: NA;CIViC: NA;MyCancerGenome: not present;CancerHotspot: no;3DHotspot: no	MutationAssessor: NA;SIFT: NA;Polyphen-2: NA	MutationAssessor: NA	SIFT: impact: deleterious, score: 0.03	Polyphen-2: impact: probably_damaging	1	Missense_Mutation	SNP	Diploid
PSMB5	Uterine Corpus Endometrial Carcinoma (TCGA, PanCancer Atlas)	TCGA-D1-A1NY-01	UCEC	Endometrial Carcinoma	Uterine Endometrioid Carcinoma	V197F		OncoKB: NA;CIViC: NA;MyCancerGenome: not present;CancerHotspot: no;3DHotspot: no	MutationAssessor: NA;SIFT: NA;Polyphen-2: NA	MutationAssessor: NA	SIFT: NA	Polyphen-2: NA		Missense_Mutation	SNP	Diploid
PSMB5	Uterine Corpus Endometrial Carcinoma (TCGA, PanCancer Atlas)	TCGA-DF-A2KU-01	UCEC	Endometrial Carcinoma	Uterine Endometrioid Carcinoma	R132H		OncoKB: NA;CIViC: NA;MyCancerGenome: not present;CancerHotspot: no;3DHotspot: no	MutationAssessor: NA;SIFT: NA;Polyphen-2: NA	MutationAssessor: NA	SIFT: impact: deleterious, score: 0.02	Polyphen-2: impact: probably_damaging	0.98	Missense_Mutation	SNP	Diploid
PSMB5	Uterine Corpus Endometrial Carcinoma (TCGA, PanCancer Atlas)	TCGA-PG-A6IB-01	UCEC	Endometrial Carcinoma	Uterine Serous Carcinoma/Uterine Papillary Serous Carcinoma	K92N		OncoKB: NA;CIViC: NA;MyCancerGenome: not present;CancerHotspot: no;3DHotspot: no	MutationAssessor: NA;SIFT: NA;Polyphen-2: NA	MutationAssessor: NA	SIFT: impact: tolerated, score: 0.42	Polyphen-2: impact: benign	0.01	Missense_Mutation	SNP	Diploid
PSMB5	Lung Adenocarcinoma (TCGA, PanCancer Atlas)	TCGA-05-4397-01	LUAD	Non-Small Cell Lung Cancer	Lung Adenocarcinoma	V13L		OncoKB: NA;CIViC: NA;MyCancerGenome: not present;CancerHotspot: no;3DHotspot: no	MutationAssessor: NA;SIFT: impact: tolerated_low_confidence, score: 0.05;Polyphen-2: impact: benign, score: 0.225	MutationAssessor: NA	SIFT: impact: deleterious, score: 0	Polyphen-2: impact: probably_damaging	0.99	Missense_Mutation	SNP	Diploid
PSMB5	Skin Cutaneous Melanoma (TCGA, PanCancer Atlas)	TCGA-FS-A1YW-06	SKCM	Melanoma	Cutaneous Melanoma	Q88H		OncoKB: NA;CIViC: NA;MyCancerGenome: not present;CancerHotspot: no;3DHotspot: no	MutationAssessor: NA;SIFT: NA;Polyphen-2: NA	MutationAssessor: NA	SIFT: impact: deleterious, score: 0.01	Polyphen-2: impact: probably_damaging	1	Missense_Mutation	SNP	Diploid
PSMB5	Skin Cutaneous Melanoma (TCGA, PanCancer Atlas)	TCGA-3N-A9WC-06	SKCM	Melanoma	Cutaneous Melanoma	R116L		OncoKB: NA;CIViC: NA;MyCancerGenome: not present;CancerHotspot: no;3DHotspot: no	MutationAssessor: NA;SIFT: NA;Polyphen-2: NA	MutationAssessor: NA	SIFT: impact: tolerated, score: 0.06	Polyphen-2: impact: benign	0.1	Missense_Mutation	SNP	ShallowDel
PSMB5	Skin Cutaneous Melanoma (TCGA, PanCancer Atlas)	TCGA-ER-A1A1-06	SKCM	Melanoma	Cutaneous Melanoma	W114L		OncoKB: NA;CIViC: NA;MyCancerGenome: not present;CancerHotspot: no;3DHotspot: no	MutationAssessor: NA;SIFT: NA;Polyphen-2: NA	MutationAssessor: NA	SIFT: impact: tolerated, score: 0.1	Polyphen-2: impact: benign	0.01	Missense_Mutation	SNP	Diploid
PSMB5	Stomach Adenocarcinoma (TCGA, PanCancer Atlas)	TCGA-BR-8368-01	STAD	Esophagogastric Adenocarcinoma	Stomach Adenocarcinoma	R239W		OncoKB: NA;CIViC: NA;MyCancerGenome: not present;CancerHotspot: no;3DHotspot: no	MutationAssessor: NA;SIFT: NA;Polyphen-2: NA	MutationAssessor: NA	SIFT: NA	Polyphen-2: NA		Missense_Mutation	SNP	Diploid
PSMB5	Breast Invasive Carcinoma (TCGA, PanCancer Atlas)	TCGA-C8-A26Y-01	BRCA	Invasive Breast Carcinoma	Breast Invasive Ductal Carcinoma	L27M		OncoKB: NA;CIViC: NA;MyCancerGenome: not present;CancerHotspot: no;3DHotspot: no	MutationAssessor: NA;SIFT: impact: deleterious_low_confidence, score: 0.04;Polyphen-2: impact: probably_damaging, score: 0.994	MutationAssessor: NA	SIFT: impact: tolerated, score: 0.15	Polyphen-2: impact: probably_damaging	1	Missense_Mutation	SNP	ShallowDel
PSMB5	Breast Invasive Carcinoma (TCGA, PanCancer Atlas)	TCGA-PE-A5DE-01	BRCA	Invasive Breast Carcinoma	Breast Invasive Lobular Carcinoma	A43V		OncoKB: NA;CIViC: NA;MyCancerGenome: not present;CancerHotspot: no;3DHotspot: no	MutationAssessor: NA;SIFT: impact: tolerated_low_confidence, score: 0.47;Polyphen-2: impact: benign, score: 0.236	MutationAssessor: NA	SIFT: impact: deleterious, score: 0	Polyphen-2: impact: probably_damaging	0.98	Missense_Mutation	SNP	Diploid
PSMB5	Breast Invasive Carcinoma (TCGA, PanCancer Atlas)	TCGA-AN-A046-01	BRCA	Invasive Breast Carcinoma	Breast Invasive Ductal Carcinoma	I160S		OncoKB: NA;CIViC: NA;MyCancerGenome: not present;CancerHotspot: no;3DHotspot: no	MutationAssessor: NA;SIFT: NA;Polyphen-2: NA	MutationAssessor: NA	SIFT: NA	Polyphen-2: NA		Missense_Mutation	SNP	Diploid
PSMB5	Breast Invasive Carcinoma (TCGA, PanCancer Atlas)	TCGA-BH-A204-01	BRCA	Invasive Breast Carcinoma	Breast Invasive Ductal Carcinoma	L39Pfs*31		OncoKB: NA;CIViC: NA;MyCancerGenome: not present;CancerHotspot: no;3DHotspot: no	MutationAssessor: NA;SIFT: NA;Polyphen-2: NA	MutationAssessor: NA	SIFT: impact: tolerated, score: 0.2	Polyphen-2: impact: benign	0.01	Frame_Shift_Del	DEL	Amp
PSMB5	Breast Invasive Carcinoma (TCGA, PanCancer Atlas)	TCGA-D8-A27V-01	BRCA	Invasive Breast Carcinoma	Breast Invasive Lobular Carcinoma	L30*		OncoKB: NA;CIViC: NA;MyCancerGenome: not present;CancerHotspot: no;3DHotspot: no	MutationAssessor: NA;SIFT: NA;Polyphen-2: NA	MutationAssessor: NA	SIFT: impact: tolerated, score: 1	Polyphen-2: impact: benign	0	Frame_Shift_Del	DEL	Diploid
PSMB5	Pancreatic Adenocarcinoma (TCGA, PanCancer Atlas)	TCGA-IB-7651-01	PAAD	Pancreatic Adenocarcinoma	Pancreatic Adenocarcinoma	A108T		OncoKB: NA;CIViC: NA;MyCancerGenome: not present;CancerHotspot: no;3DHotspot: no	MutationAssessor: NA;SIFT: NA;Polyphen-2: NA	MutationAssessor: NA	SIFT: impact: deleterious, score: 0	Polyphen-2: impact: probably_damaging	1	Missense_Mutation	SNP	Diploid
PSMB5	Colorectal Adenocarcinoma (TCGA, PanCancer Atlas)	TCGA-A6-2686-01	COAD	Colorectal Adenocarcinoma	Colon Adenocarcinoma	G107Afs*29		OncoKB: NA;CIViC: NA;MyCancerGenome: not present;CancerHotspot: no;3DHotspot: no	MutationAssessor: NA;SIFT: NA;Polyphen-2: NA	MutationAssessor: NA	SIFT: impact: deleterious, score: 0	Polyphen-2: impact: probably_damaging	1	Frame_Shift_Del	DEL	Gain
PSMB5	Colorectal Adenocarcinoma (TCGA, PanCancer Atlas)	TCGA-AD-6889-01	COAD	Colorectal Adenocarcinoma	Colon Adenocarcinoma	R120W		OncoKB: NA;CIViC: NA;MyCancerGenome: not present;CancerHotspot: no;3DHotspot: no	MutationAssessor: NA;SIFT: NA;Polyphen-2: NA	MutationAssessor: NA	SIFT: impact: deleterious, score: 0	Polyphen-2: impact: probably_damaging	1	Missense_Mutation	SNP	Diploid
PSMB5	Colorectal Adenocarcinoma (TCGA, PanCancer Atlas)	TCGA-CM-6162-01	COAD	Colorectal Adenocarcinoma	Mucinous Adenocarcinoma of the Colon and Rectum	Q210H		OncoKB: NA;CIViC: NA;MyCancerGenome: not present;CancerHotspot: no;3DHotspot: no	MutationAssessor: NA;SIFT: NA;Polyphen-2: NA	MutationAssessor: NA	SIFT: impact: deleterious, score: 0.01	Polyphen-2: impact: possibly_damaging	0.51	Missense_Mutation	SNP	Diploid
PSMB5	Kidney Renal Papillary Cell Carcinoma (TCGA, PanCancer Atlas)	TCGA-2Z-A9J8-01	KIRP	Renal Non-Clear Cell Carcinoma	Papillary Renal Cell Carcinoma	A143G		OncoKB: NA;CIViC: NA;MyCancerGenome: not present;CancerHotspot: no;3DHotspot: no	MutationAssessor: NA;SIFT: NA;Polyphen-2: NA	MutationAssessor: NA	SIFT: NA	Polyphen-2: NA		Missense_Mutation	SNP	Diploid
PSMB5	Head and Neck Squamous Cell Carcinoma (TCGA, PanCancer Atlas)	TCGA-F7-A624-01	HNSC	Head and Neck Squamous Cell Carcinoma	Head and Neck Squamous Cell Carcinoma	Y212C		OncoKB: NA;CIViC: NA;MyCancerGenome: not present;CancerHotspot: no;3DHotspot: no	MutationAssessor: NA;SIFT: NA;Polyphen-2: NA	MutationAssessor: NA	SIFT: impact: deleterious, score: 0.03	Polyphen-2: impact: benign	0	Missense_Mutation	SNP	Gain
PSMB5	Head and Neck Squamous Cell Carcinoma (TCGA, PanCancer Atlas)	TCGA-CV-7418-01	HNSC	Head and Neck Squamous Cell Carcinoma	Head and Neck Squamous Cell Carcinoma	K150R		OncoKB: NA;CIViC: NA;MyCancerGenome: not present;CancerHotspot: no;3DHotspot: no	MutationAssessor: NA;SIFT: NA;Polyphen-2: NA	MutationAssessor: NA	SIFT: impact: deleterious, score: 0	Polyphen-2: impact: probably_damaging	1	Missense_Mutation	SNP	Gain
PSMB5	Cervical Squamous Cell Carcinoma (TCGA, PanCancer Atlas)	TCGA-HM-A6W2-01	CESC	Cervical Squamous Cell Carcinoma	Cervical Squamous Cell Carcinoma	R216C		OncoKB: NA;CIViC: NA;MyCancerGenome: not present;CancerHotspot: no;3DHotspot: no	MutationAssessor: NA;SIFT: NA;Polyphen-2: NA	MutationAssessor: NA	SIFT: impact: tolerated, score: 0.18	Polyphen-2: impact: benign	0.01	Missense_Mutation	SNP	Diploid
PSMB5	Mesothelioma (TCGA, PanCancer Atlas)	TCGA-LK-A4NY-01	MESO	Pleural Mesothelioma	Pleural Mesothelioma, Biphasic Type	D253N		OncoKB: NA;CIViC: NA;MyCancerGenome: not present;CancerHotspot: no;3DHotspot: no	MutationAssessor: NA;SIFT: NA;Polyphen-2: NA	MutationAssessor: NA	SIFT: NA	Polyphen-2: NA		Missense_Mutation	SNP	Diploid
PSMB6	Lung Adenocarcinoma (TCGA, PanCancer Atlas)	TCGA-97-8171-01	LUAD	Non-Small Cell Lung Cancer	Lung Adenocarcinoma	PSMB6-ENO3		OncoKB: Unknown, level NA, resistance NA;CIViC: NA;MyCancerGenome: not present;CancerHotspot: no;3DHotspot: no	MutationAssessor: NA;SIFT: NA;Polyphen-2: NA	MutationAssessor: NA	SIFT: NA	Polyphen-2: NA		fusion	FUSION	ShallowDel
PSMB6	Thyroid Carcinoma (TCGA, PanCancer Atlas)	TCGA-DJ-A2QB-01	THCA	Well-Differentiated Thyroid Cancer	Papillary Thyroid Cancer	W137C		OncoKB: NA;CIViC: NA;MyCancerGenome: not present;CancerHotspot: no;3DHotspot: no	MutationAssessor: NA;SIFT: impact: deleterious, score: 0;Polyphen-2: impact: probably_damaging, score: 0.998	MutationAssessor: NA	SIFT: NA	Polyphen-2: NA		Missense_Mutation	SNP	Diploid
PSMB6	Ovarian Serous Cystadenocarcinoma (TCGA, PanCancer Atlas)	TCGA-13-0760-01	OV	Ovarian Epithelial Tumor	Serous Ovarian Cancer	E103G		OncoKB: NA;CIViC: NA;MyCancerGenome: not present;CancerHotspot: no;3DHotspot: no	MutationAssessor: NA;SIFT: impact: deleterious, score: 0;Polyphen-2: impact: probably_damaging, score: 0.95	MutationAssessor: NA	SIFT: NA	Polyphen-2: NA		Missense_Mutation	SNP	Gain
PSMB6	Sarcoma (TCGA, PanCancer Atlas)	TCGA-QC-A7B5-01	SARC	Sarcoma	Undifferentiated Pleomorphic Sarcoma/Malignant Fibrous Histiocytoma/High-Grade Spindle Cell Sarcoma	G180S		OncoKB: NA;CIViC: NA;MyCancerGenome: not present;CancerHotspot: no;3DHotspot: no	MutationAssessor: NA;SIFT: impact: deleterious, score: 0.02;Polyphen-2: impact: possibly_damaging, score: 0.904	MutationAssessor: NA	SIFT: NA	Polyphen-2: NA		Missense_Mutation	SNP	Gain
PSMB6	Lung Squamous Cell Carcinoma (TCGA, PanCancer Atlas)	TCGA-94-8491-01	LUSC	Non-Small Cell Lung Cancer	Lung Squamous Cell Carcinoma	S203Y		OncoKB: NA;CIViC: NA;MyCancerGenome: not present;CancerHotspot: no;3DHotspot: no	MutationAssessor: NA;SIFT: impact: deleterious, score: 0;Polyphen-2: impact: probably_damaging, score: 1	MutationAssessor: NA	SIFT: NA	Polyphen-2: NA		Missense_Mutation	SNP	ShallowDel
PSMB6	Bladder Urothelial Carcinoma (TCGA, PanCancer Atlas)	TCGA-BT-A3PK-01	BLCA	Bladder Urothelial Carcinoma	Bladder Urothelial Carcinoma	N62K		OncoKB: NA;CIViC: NA;MyCancerGenome: not present;CancerHotspot: no;3DHotspot: no	MutationAssessor: NA;SIFT: impact: deleterious, score: 0;Polyphen-2: impact: probably_damaging, score: 1	MutationAssessor: NA	SIFT: NA	Polyphen-2: NA		Missense_Mutation	SNP	ShallowDel
PSMB6	Liver Hepatocellular Carcinoma (TCGA, PanCancer Atlas)	TCGA-CC-A3MC-01	LIHC	Hepatocellular Carcinoma	Hepatocellular Carcinoma	P238H		OncoKB: NA;CIViC: NA;MyCancerGenome: not present;CancerHotspot: no;3DHotspot: no	MutationAssessor: NA;SIFT: impact: deleterious_low_confidence, score: 0;Polyphen-2: impact: benign, score: 0	MutationAssessor: NA	SIFT: NA	Polyphen-2: NA		Missense_Mutation	SNP	ShallowDel
PSMB6	Uterine Corpus Endometrial Carcinoma (TCGA, PanCancer Atlas)	TCGA-AP-A056-01	UCEC	Endometrial Carcinoma	Uterine Endometrioid Carcinoma	D73N		OncoKB: NA;CIViC: NA;MyCancerGenome: not present;CancerHotspot: no;3DHotspot: no	MutationAssessor: NA;SIFT: impact: deleterious, score: 0.01;Polyphen-2: impact: benign, score: 0.268	MutationAssessor: NA	SIFT: impact: deleterious, score: 0	Polyphen-2: impact: possibly_damaging	0.63	Missense_Mutation	SNP	Diploid
PSMB6	Uterine Corpus Endometrial Carcinoma (TCGA, PanCancer Atlas)	TCGA-AP-A05N-01	UCEC	Endometrial Carcinoma	Uterine Endometrioid Carcinoma	X57_splice		OncoKB: NA;CIViC: NA;MyCancerGenome: not present;CancerHotspot: no;3DHotspot: no	MutationAssessor: NA;SIFT: NA;Polyphen-2: NA	MutationAssessor: NA	SIFT: impact: deleterious, score: 0	Polyphen-2: impact: possibly_damaging	score: 0.864	Splice_Site	SNP	Diploid
PSMB6	Uterine Corpus Endometrial Carcinoma (TCGA, PanCancer Atlas)	TCGA-BS-A0UV-01	UCEC	Endometrial Carcinoma	Uterine Endometrioid Carcinoma	R63Q		OncoKB: NA;CIViC: NA;MyCancerGenome: not present;CancerHotspot: no;3DHotspot: no	MutationAssessor: NA;SIFT: impact: deleterious, score: 0.03;Polyphen-2: impact: probably_damaging, score: 0.996	MutationAssessor: NA	SIFT: impact: deleterious, score: 0	Polyphen-2: impact: benign	0.28	Missense_Mutation	SNP	Diploid
PSMB6	Uterine Corpus Endometrial Carcinoma (TCGA, PanCancer Atlas)	TCGA-D1-A17D-01	UCEC	Endometrial Carcinoma	Uterine Endometrioid Carcinoma	E141del		OncoKB: NA;CIViC: NA;MyCancerGenome: not present;CancerHotspot: no;3DHotspot: no	MutationAssessor: NA;SIFT: NA;Polyphen-2: NA	MutationAssessor: NA	SIFT: impact: tolerated, score: 0.34	Polyphen-2: impact: benign	0.28	In_Frame_Del	DEL	Diploid
PSMB6	Uterine Corpus Endometrial Carcinoma (TCGA, PanCancer Atlas)	TCGA-DF-A2KU-01	UCEC	Endometrial Carcinoma	Uterine Endometrioid Carcinoma	A61T		OncoKB: NA;CIViC: NA;MyCancerGenome: not present;CancerHotspot: no;3DHotspot: no	MutationAssessor: NA;SIFT: impact: deleterious, score: 0.02;Polyphen-2: impact: probably_damaging, score: 0.978	MutationAssessor: NA	SIFT: impact: deleterious, score: 0	Polyphen-2: impact: possibly_damaging	0.52	Missense_Mutation	SNP	Diploid
PSMB6	Uterine Corpus Endometrial Carcinoma (TCGA, PanCancer Atlas)	TCGA-AP-A0LF-01	UCEC	Endometrial Carcinoma	Uterine Endometrioid Carcinoma	P139R		OncoKB: NA;CIViC: NA;MyCancerGenome: not present;CancerHotspot: no;3DHotspot: no	MutationAssessor: NA;SIFT: impact: tolerated, score: 0.42;Polyphen-2: impact: benign, score: 0.006	MutationAssessor: NA	SIFT: impact: deleterious, score: 0.02	Polyphen-2: impact: benign	0.37	Missense_Mutation	SNP	Diploid
PSMB6	Uterine Corpus Endometrial Carcinoma (TCGA, PanCancer Atlas)	TCGA-A5-A0G1-01	UCEC	Endometrial Carcinoma	Uterine Serous Carcinoma/Uterine Papillary Serous Carcinoma	G225R		OncoKB: NA;CIViC: NA;MyCancerGenome: not present;CancerHotspot: no;3DHotspot: no	MutationAssessor: NA;SIFT: impact: deleterious, score: 0;Polyphen-2: impact: probably_damaging, score: 0.994	MutationAssessor: NA	SIFT: impact: deleterious, score: 0.01	Polyphen-2: impact: possibly_damaging	0.55	Missense_Mutation	SNP	Diploid
PSMB6	Uterine Corpus Endometrial Carcinoma (TCGA, PanCancer Atlas)	TCGA-A5-A1OF-01	UCEC	Endometrial Carcinoma	Uterine Mixed Endometrial Carcinoma	G142R		OncoKB: NA;CIViC: NA;MyCancerGenome: not present;CancerHotspot: no;3DHotspot: no	MutationAssessor: NA;SIFT: impact: deleterious, score: 0.01;Polyphen-2: impact: probably_damaging, score: 0.997	MutationAssessor: NA	SIFT: impact: tolerated, score: 0.57	Polyphen-2: impact: benign	0	Missense_Mutation	SNP	Diploid
PSMB6	Uterine Corpus Endometrial Carcinoma (TCGA, PanCancer Atlas)	TCGA-AP-A059-01	UCEC	Endometrial Carcinoma	Uterine Endometrioid Carcinoma	K118N		OncoKB: NA;CIViC: NA;MyCancerGenome: not present;CancerHotspot: no;3DHotspot: no	MutationAssessor: NA;SIFT: impact: tolerated, score: 0.06;Polyphen-2: impact: benign, score: 0.104	MutationAssessor: NA	SIFT: impact: tolerated, score: 0.08	Polyphen-2: impact: probably_damaging	0.95	Missense_Mutation	SNP	Diploid
PSMB6	Uterine Corpus Endometrial Carcinoma (TCGA, PanCancer Atlas)	TCGA-AP-A1DK-01	UCEC	Endometrial Carcinoma	Uterine Endometrioid Carcinoma	S101N		OncoKB: NA;CIViC: NA;MyCancerGenome: not present;CancerHotspot: no;3DHotspot: no	MutationAssessor: NA;SIFT: impact: tolerated, score: 0.1;Polyphen-2: impact: benign, score: 0.007	MutationAssessor: NA	SIFT: impact: deleterious, score: 0	Polyphen-2: impact: probably_damaging	1	Missense_Mutation	SNP	Diploid
PSMB6	Uterine Corpus Endometrial Carcinoma (TCGA, PanCancer Atlas)	TCGA-B5-A0JU-01	UCEC	Endometrial Carcinoma	Uterine Endometrioid Carcinoma	M153Yfs*22		OncoKB: NA;CIViC: NA;MyCancerGenome: not present;CancerHotspot: no;3DHotspot: no	MutationAssessor: NA;SIFT: NA;Polyphen-2: NA	MutationAssessor: NA	SIFT: NA	Polyphen-2: NA		Frame_Shift_Ins	INS	Diploid
PSMB6	Uterine Corpus Endometrial Carcinoma (TCGA, PanCancer Atlas)	TCGA-B5-A3FC-01	UCEC	Endometrial Carcinoma	Uterine Endometrioid Carcinoma	R200W		OncoKB: NA;CIViC: NA;MyCancerGenome: not present;CancerHotspot: no;3DHotspot: no	MutationAssessor: NA;SIFT: impact: tolerated, score: 0.15;Polyphen-2: impact: probably_damaging, score: 1	MutationAssessor: NA	SIFT: impact: tolerated, score: 0.71	Polyphen-2: impact: benign	0.01	Missense_Mutation	SNP	Diploid
PSMB6	Uterine Corpus Endometrial Carcinoma (TCGA, PanCancer Atlas)	TCGA-BK-A13B-01	UCEC	Endometrial Carcinoma	Uterine Endometrioid Carcinoma	M198T		OncoKB: NA;CIViC: NA;MyCancerGenome: not present;CancerHotspot: no;3DHotspot: no	MutationAssessor: NA;SIFT: impact: deleterious, score: 0;Polyphen-2: impact: probably_damaging, score: 0.983	MutationAssessor: NA	SIFT: impact: deleterious, score: 0.01	Polyphen-2: impact: probably_damaging	1	Missense_Mutation	SNP	Diploid
PSMB6	Uterine Corpus Endometrial Carcinoma (TCGA, PanCancer Atlas)	TCGA-D1-A16F-01	UCEC	Endometrial Carcinoma	Uterine Endometrioid Carcinoma	G152Vfs*2		OncoKB: NA;CIViC: NA;MyCancerGenome: not present;CancerHotspot: no;3DHotspot: no	MutationAssessor: NA;SIFT: NA;Polyphen-2: NA	MutationAssessor: NA	SIFT: impact: tolerated, score: 0.2	Polyphen-2: impact: benign	0	Frame_Shift_Del	DEL
PSMB6	Lung Adenocarcinoma (TCGA, PanCancer Atlas)	TCGA-35-4123-01	LUAD	Non-Small Cell Lung Cancer	Lung Adenocarcinoma	T182N		OncoKB: NA;CIViC: NA;MyCancerGenome: not present;CancerHotspot: no;3DHotspot: no	MutationAssessor: NA;SIFT: impact: tolerated, score: 0.2;Polyphen-2: impact: benign, score: 0.007	MutationAssessor: NA	SIFT: impact: tolerated, score: 0.06	Polyphen-2: impact: benign	0.05	Missense_Mutation	SNP	ShallowDel
PSMB6	Esophageal Adenocarcinoma (TCGA, PanCancer Atlas)	TCGA-JY-A93E-01	ESCA	Esophagogastric Adenocarcinoma	Esophageal Adenocarcinoma	A232S		OncoKB: NA;CIViC: NA;MyCancerGenome: not present;CancerHotspot: no;3DHotspot: no	MutationAssessor: NA;SIFT: impact: tolerated, score: 1;Polyphen-2: impact: benign, score: 0.001	MutationAssessor: NA	SIFT: impact: deleterious, score: 0.03	Polyphen-2: impact: benign	0.08	Missense_Mutation	SNP	ShallowDel
PSMB6	Skin Cutaneous Melanoma (TCGA, PanCancer Atlas)	TCGA-FS-A4F0-06	SKCM	Melanoma	Cutaneous Melanoma	G165R		OncoKB: NA;CIViC: NA;MyCancerGenome: not present;CancerHotspot: no;3DHotspot: no	MutationAssessor: NA;SIFT: impact: deleterious, score: 0;Polyphen-2: impact: probably_damaging, score: 1	MutationAssessor: NA	SIFT: impact: deleterious, score: 0.02	Polyphen-2: impact: benign	0.25	Missense_Mutation	SNP	Diploid
PSMB6	Skin Cutaneous Melanoma (TCGA, PanCancer Atlas)	TCGA-FS-A4F0-06	SKCM	Melanoma	Cutaneous Melanoma	G165E		OncoKB: NA;CIViC: NA;MyCancerGenome: not present;CancerHotspot: no;3DHotspot: no	MutationAssessor: NA;SIFT: impact: deleterious, score: 0;Polyphen-2: impact: probably_damaging, score: 1	MutationAssessor: NA	SIFT: impact: deleterious, score: 0	Polyphen-2: impact: benign	0.18	Missense_Mutation	SNP	Diploid
PSMB6	Stomach Adenocarcinoma (TCGA, PanCancer Atlas)	TCGA-CD-A4MI-01	STAD	Esophagogastric Adenocarcinoma	Stomach Adenocarcinoma	R79C		OncoKB: NA;CIViC: NA;MyCancerGenome: not present;CancerHotspot: no;3DHotspot: no	MutationAssessor: NA;SIFT: impact: deleterious, score: 0;Polyphen-2: impact: probably_damaging, score: 1	MutationAssessor: NA	SIFT: impact: tolerated, score: 0.06	Polyphen-2: impact: possibly_damaging	0.61	Missense_Mutation	SNP	Diploid
PSMB6	Stomach Adenocarcinoma (TCGA, PanCancer Atlas)	TCGA-EQ-A4SO-01	STAD	Esophagogastric Adenocarcinoma	Stomach Adenocarcinoma	V222E		OncoKB: NA;CIViC: NA;MyCancerGenome: not present;CancerHotspot: no;3DHotspot: no	MutationAssessor: NA;SIFT: impact: deleterious, score: 0.01;Polyphen-2: impact: possibly_damaging, score: 0.506	MutationAssessor: NA	SIFT: impact: deleterious, score: 0	Polyphen-2: impact: probably_damaging	1	Missense_Mutation	SNP	Gain
PSMB6	Stomach Adenocarcinoma (TCGA, PanCancer Atlas)	TCGA-EQ-A4SO-01	STAD	Esophagogastric Adenocarcinoma	Stomach Adenocarcinoma	Q227*		OncoKB: NA;CIViC: NA;MyCancerGenome: not present;CancerHotspot: no;3DHotspot: no	MutationAssessor: NA;SIFT: NA;Polyphen-2: NA	MutationAssessor: NA	SIFT: impact: deleterious, score: 0	Polyphen-2: impact: probably_damaging	1	Nonsense_Mutation	SNP	Gain
PSMB6	Breast Invasive Carcinoma (TCGA, PanCancer Atlas)	TCGA-A8-A083-01	BRCA	Invasive Breast Carcinoma	Breast Invasive Ductal Carcinoma	M150V		OncoKB: NA;CIViC: NA;MyCancerGenome: not present;CancerHotspot: no;3DHotspot: no	MutationAssessor: NA;SIFT: impact: deleterious, score: 0.03;Polyphen-2: impact: benign, score: 0.001	MutationAssessor: NA	SIFT: impact: tolerated, score: 0.31	Polyphen-2: impact: benign	0.02	Missense_Mutation	SNP	Diploid
PSMB6	Breast Invasive Carcinoma (TCGA, PanCancer Atlas)	TCGA-C8-A133-01	BRCA	Invasive Breast Carcinoma	Breast Invasive Carcinoma (NOS)	S52F		OncoKB: NA;CIViC: NA;MyCancerGenome: not present;CancerHotspot: no;3DHotspot: no	MutationAssessor: NA;SIFT: impact: deleterious, score: 0;Polyphen-2: impact: probably_damaging, score: 0.999	MutationAssessor: NA	SIFT: impact: tolerated, score: 0.3	Polyphen-2: impact: benign	0	Missense_Mutation	SNP	Diploid
PSMB6	Colorectal Adenocarcinoma (TCGA, PanCancer Atlas)	TCGA-AA-3949-01	COAD	Colorectal Adenocarcinoma	Mucinous Adenocarcinoma of the Colon and Rectum	A92V		OncoKB: NA;CIViC: NA;MyCancerGenome: not present;CancerHotspot: no;3DHotspot: no	MutationAssessor: NA;SIFT: impact: tolerated, score: 0.18;Polyphen-2: impact: benign, score: 0.009	MutationAssessor: NA	SIFT: NA	Polyphen-2: NA		Missense_Mutation	SNP	Diploid
PSMB6	Colorectal Adenocarcinoma (TCGA, PanCancer Atlas)	TCGA-CK-4951-01	COAD	Colorectal Adenocarcinoma	Mucinous Adenocarcinoma of the Colon and Rectum	G57=		OncoKB: NA;CIViC: NA;MyCancerGenome: not present;CancerHotspot: no;3DHotspot: no	MutationAssessor: NA;SIFT: NA;Polyphen-2: NA	MutationAssessor: NA	SIFT: impact: tolerated, score: 0.29	Polyphen-2: impact: benign	score: 0.001	Splice_Region	SNP	Diploid
PSMB6	Cervical Squamous Cell Carcinoma (TCGA, PanCancer Atlas)	TCGA-EK-A3GJ-01	CESC	Cervical Squamous Cell Carcinoma	Cervical Squamous Cell Carcinoma	S80*		OncoKB: NA;CIViC: NA;MyCancerGenome: not present;CancerHotspot: no;3DHotspot: no	MutationAssessor: NA;SIFT: NA;Polyphen-2: NA	MutationAssessor: NA	SIFT: impact: deleterious, score: 0	Polyphen-2: impact: probably_damaging	1	Nonsense_Mutation	SNP	ShallowDel
PSMB7	Prostate Adenocarcinoma (TCGA, PanCancer Atlas)	TCGA-ZG-A9LZ-01	PRAD	Prostate Adenocarcinoma	Prostate Adenocarcinoma	SHQ1-PSMB7		OncoKB: Likely Oncogenic, level NA, resistance NA;CIViC: NA;MyCancerGenome: not present;CancerHotspot: no;3DHotspot: no	MutationAssessor: NA;SIFT: NA;Polyphen-2: NA	MutationAssessor: NA	SIFT: impact: deleterious, score: 0	Polyphen-2: impact: probably_damaging	1	fusion	FUSION	Diploid
PSMB7	Sarcoma (TCGA, PanCancer Atlas)	TCGA-DX-A7ES-01	SARC	Sarcoma	Dedifferentiated Liposarcoma	PSMB7-NR6A1	rs = 0.0849, q-value = 0.255	OncoKB: Unknown, level NA, resistance NA;CIViC: NA;MyCancerGenome: not present;CancerHotspot: no;3DHotspot: no	MutationAssessor: NA;SIFT: NA;Polyphen-2: NA	MutationAssessor: NA	SIFT: impact: deleterious, score: 0	Polyphen-2: impact: possibly_damaging	0.84	fusion	FUSION	Amp
PSMB7	Lung Adenocarcinoma (TCGA, PanCancer Atlas)	TCGA-69-7979-01	LUAD	Non-Small Cell Lung Cancer	Lung Adenocarcinoma	PSMB7-GOLGA1		OncoKB: Unknown, level NA, resistance NA;CIViC: NA;MyCancerGenome: not present;CancerHotspot: no;3DHotspot: no	MutationAssessor: NA;SIFT: NA;Polyphen-2: NA	MutationAssessor: NA	SIFT: NA	Polyphen-2: NA		fusion	FUSION	Diploid
PSMB7	Skin Cutaneous Melanoma (TCGA, PanCancer Atlas)	TCGA-EB-A4OY-01	SKCM	Melanoma	Cutaneous Melanoma	LONRF1-PSMB7		OncoKB: Unknown, level NA, resistance NA;CIViC: NA;MyCancerGenome: not present;CancerHotspot: no;3DHotspot: no	MutationAssessor: NA;SIFT: NA;Polyphen-2: NA	MutationAssessor: NA	SIFT: NA	Polyphen-2: NA		fusion	FUSION
PSMB7	Skin Cutaneous Melanoma (TCGA, PanCancer Atlas)	TCGA-EB-A4OZ-01	SKCM	Melanoma	Cutaneous Melanoma	COG3-PSMB7		OncoKB: Unknown, level NA, resistance NA;CIViC: NA;MyCancerGenome: not present;CancerHotspot: no;3DHotspot: no	MutationAssessor: NA;SIFT: NA;Polyphen-2: NA	MutationAssessor: NA	SIFT: NA	Polyphen-2: NA		fusion	FUSION
PSMB7	Skin Cutaneous Melanoma (TCGA, PanCancer Atlas)	TCGA-EE-A2MC-06	SKCM	Melanoma	Cutaneous Melanoma	PSMB7-PID1		OncoKB: Unknown, level NA, resistance NA;CIViC: NA;MyCancerGenome: not present;CancerHotspot: no;3DHotspot: no	MutationAssessor: NA;SIFT: NA;Polyphen-2: NA	MutationAssessor: NA	SIFT: NA	Polyphen-2: NA		fusion	FUSION	Diploid
PSMB7	Breast Invasive Carcinoma (TCGA, PanCancer Atlas)	TCGA-E9-A1R0-01	BRCA	Invasive Breast Carcinoma	Breast Invasive Ductal Carcinoma	FAR1-PSMB7		OncoKB: Unknown, level NA, resistance NA;CIViC: NA;MyCancerGenome: not present;CancerHotspot: no;3DHotspot: no	MutationAssessor: NA;SIFT: NA;Polyphen-2: NA	MutationAssessor: NA	SIFT: NA	Polyphen-2: NA		fusion	FUSION	Diploid
PSMB7	Glioblastoma Multiforme (TCGA, PanCancer Atlas)	TCGA-19-5956-01	GBM	Glioblastoma	Glioblastoma Multiforme	T113N		OncoKB: NA;CIViC: NA;MyCancerGenome: not present;CancerHotspot: no;3DHotspot: no	MutationAssessor: NA;SIFT: impact: deleterious, score: 0;Polyphen-2: impact: possibly_damaging, score: 0.625	MutationAssessor: NA	SIFT: NA	Polyphen-2: NA		Missense_Mutation	SNP	Diploid
PSMB7	Bladder Urothelial Carcinoma (TCGA, PanCancer Atlas)	TCGA-DK-AA6P-01	BLCA	Bladder Urothelial Carcinoma	Bladder Urothelial Carcinoma	F131L		OncoKB: NA;CIViC: NA;MyCancerGenome: not present;CancerHotspot: no;3DHotspot: no	MutationAssessor: NA;SIFT: impact: deleterious, score: 0;Polyphen-2: impact: possibly_damaging, score: 0.864	MutationAssessor: NA	SIFT: NA	Polyphen-2: NA		Missense_Mutation	SNP	ShallowDel
PSMB7	Bladder Urothelial Carcinoma (TCGA, PanCancer Atlas)	TCGA-XF-A8HD-01	BLCA	Bladder Urothelial Carcinoma	Bladder Urothelial Carcinoma	Q134E		OncoKB: NA;CIViC: NA;MyCancerGenome: not present;CancerHotspot: no;3DHotspot: no	MutationAssessor: NA;SIFT: impact: deleterious, score: 0;Polyphen-2: impact: benign, score: 0.28	MutationAssessor: NA	SIFT: NA	Polyphen-2: NA		Missense_Mutation	SNP	Gain
PSMB7	Bladder Urothelial Carcinoma (TCGA, PanCancer Atlas)	TCGA-ZF-AA4W-01	BLCA	Bladder Urothelial Carcinoma	Bladder Urothelial Carcinoma	K195R		OncoKB: NA;CIViC: NA;MyCancerGenome: not present;CancerHotspot: no;3DHotspot: no	MutationAssessor: NA;SIFT: impact: tolerated, score: 0.34;Polyphen-2: impact: benign, score: 0.276	MutationAssessor: NA	SIFT: NA	Polyphen-2: NA		Missense_Mutation	SNP	Gain
PSMB7	Bladder Urothelial Carcinoma (TCGA, PanCancer Atlas)	TCGA-BT-A2LA-01	BLCA	Bladder Urothelial Carcinoma	Bladder Urothelial Carcinoma	S103C		OncoKB: NA;CIViC: NA;MyCancerGenome: not present;CancerHotspot: no;3DHotspot: no	MutationAssessor: NA;SIFT: impact: deleterious, score: 0;Polyphen-2: impact: possibly_damaging, score: 0.515	MutationAssessor: NA	SIFT: NA	Polyphen-2: NA		Missense_Mutation	SNP	Gain
PSMB7	Liver Hepatocellular Carcinoma (TCGA, PanCancer Atlas)	TCGA-G3-A6UC-01	LIHC	Hepatocellular Carcinoma	Hepatocellular Carcinoma	L111V		OncoKB: NA;CIViC: NA;MyCancerGenome: not present;CancerHotspot: no;3DHotspot: no	MutationAssessor: NA;SIFT: impact: deleterious, score: 0.02;Polyphen-2: impact: benign, score: 0.368	MutationAssessor: NA	SIFT: NA	Polyphen-2: NA		Missense_Mutation	SNP	Diploid
PSMB7	Liver Hepatocellular Carcinoma (TCGA, PanCancer Atlas)	TCGA-DD-AADG-01	LIHC	Hepatocellular Carcinoma	Hepatocellular Carcinoma	F228C		OncoKB: NA;CIViC: NA;MyCancerGenome: not present;CancerHotspot: no;3DHotspot: no	MutationAssessor: NA;SIFT: impact: deleterious, score: 0.01;Polyphen-2: impact: possibly_damaging, score: 0.545	MutationAssessor: NA	SIFT: NA	Polyphen-2: NA		Missense_Mutation	SNP	Diploid
PSMB7	Kidney Renal Clear Cell Carcinoma (TCGA, PanCancer Atlas)	TCGA-B0-5709-01	KIRC	Renal Clear Cell Carcinoma	Renal Clear Cell Carcinoma	V11D		OncoKB: NA;CIViC: NA;MyCancerGenome: not present;CancerHotspot: no;3DHotspot: no	MutationAssessor: NA;SIFT: impact: tolerated, score: 0.57;Polyphen-2: impact: benign, score: 0	MutationAssessor: NA	SIFT: NA	Polyphen-2: NA		Missense_Mutation	SNP	Diploid
PSMB7	Uterine Corpus Endometrial Carcinoma (TCGA, PanCancer Atlas)	TCGA-AJ-A3EL-01	UCEC	Endometrial Carcinoma	Uterine Endometrioid Carcinoma	R124W		OncoKB: NA;CIViC: NA;MyCancerGenome: not present;CancerHotspot: no;3DHotspot: no	MutationAssessor: NA;SIFT: impact: tolerated, score: 0.08;Polyphen-2: impact: probably_damaging, score: 0.949	MutationAssessor: NA	SIFT: NA	Polyphen-2: NA		Missense_Mutation	SNP	Diploid
PSMB7	Uterine Corpus Endometrial Carcinoma (TCGA, PanCancer Atlas)	TCGA-AP-A051-01	UCEC	Endometrial Carcinoma	Uterine Endometrioid Carcinoma	G54V		OncoKB: NA;CIViC: NA;MyCancerGenome: not present;CancerHotspot: no;3DHotspot: no	MutationAssessor: NA;SIFT: impact: deleterious, score: 0;Polyphen-2: impact: probably_damaging, score: 0.999	MutationAssessor: NA	SIFT: NA	Polyphen-2: NA		Missense_Mutation	SNP	Diploid
PSMB7	Uterine Corpus Endometrial Carcinoma (TCGA, PanCancer Atlas)	TCGA-B5-A11H-01	UCEC	Endometrial Carcinoma	Uterine Endometrioid Carcinoma	S277Pfs*16		OncoKB: NA;CIViC: NA;MyCancerGenome: not present;CancerHotspot: no;3DHotspot: no	MutationAssessor: NA;SIFT: NA;Polyphen-2: NA	MutationAssessor: NA	SIFT: NA	Polyphen-2: NA		Frame_Shift_Del	DEL	ShallowDel
PSMB7	Uterine Corpus Endometrial Carcinoma (TCGA, PanCancer Atlas)	TCGA-DF-A2KU-01	UCEC	Endometrial Carcinoma	Uterine Endometrioid Carcinoma	A203T		OncoKB: NA;CIViC: NA;MyCancerGenome: not present;CancerHotspot: no;3DHotspot: no	MutationAssessor: NA;SIFT: impact: tolerated, score: 0.71;Polyphen-2: impact: benign, score: 0.006	MutationAssessor: NA	SIFT: NA	Polyphen-2: NA		Missense_Mutation	SNP	Diploid
PSMB7	Uterine Corpus Endometrial Carcinoma (TCGA, PanCancer Atlas)	TCGA-AX-A2HD-01	UCEC	Endometrial Carcinoma	Uterine Endometrioid Carcinoma	C87Y		OncoKB: NA;CIViC: NA;MyCancerGenome: not present;CancerHotspot: no;3DHotspot: no	MutationAssessor: NA;SIFT: impact: deleterious, score: 0.01;Polyphen-2: impact: probably_damaging, score: 0.996	MutationAssessor: NA	SIFT: NA	Polyphen-2: NA		Missense_Mutation	SNP	Diploid
PSMB7	Uterine Corpus Endometrial Carcinoma (TCGA, PanCancer Atlas)	TCGA-B5-A3FC-01	UCEC	Endometrial Carcinoma	Uterine Endometrioid Carcinoma	A3D		OncoKB: NA;CIViC: NA;MyCancerGenome: not present;CancerHotspot: no;3DHotspot: no	MutationAssessor: NA;SIFT: impact: tolerated, score: 0.2;Polyphen-2: impact: benign, score: 0.003	MutationAssessor: NA	SIFT: NA	Polyphen-2: NA		Missense_Mutation	SNP	Diploid
PSMB7	Uterine Corpus Endometrial Carcinoma (TCGA, PanCancer Atlas)	TCGA-E6-A1LX-01	UCEC	Endometrial Carcinoma	Uterine Endometrioid Carcinoma	K223N		OncoKB: NA;CIViC: NA;MyCancerGenome: not present;CancerHotspot: no;3DHotspot: no	MutationAssessor: NA;SIFT: impact: tolerated, score: 0.06;Polyphen-2: impact: benign, score: 0.047	MutationAssessor: NA	SIFT: NA	Polyphen-2: NA		Missense_Mutation	SNP	Diploid
PSMB7	Uterine Corpus Endometrial Carcinoma (TCGA, PanCancer Atlas)	TCGA-EC-A24G-01	UCEC	Endometrial Carcinoma	Uterine Endometrioid Carcinoma	V271A		OncoKB: NA;CIViC: NA;MyCancerGenome: not present;CancerHotspot: no;3DHotspot: no	MutationAssessor: NA;SIFT: impact: deleterious, score: 0.03;Polyphen-2: impact: benign, score: 0.082	MutationAssessor: NA	SIFT: NA	Polyphen-2: NA		Missense_Mutation	SNP	Diploid
PSMB7	Uterine Corpus Endometrial Carcinoma (TCGA, PanCancer Atlas)	TCGA-SJ-A6ZI-01	UCEC	Endometrial Carcinoma	Uterine Endometrioid Carcinoma	A70V		OncoKB: NA;CIViC: NA;MyCancerGenome: not present;CancerHotspot: no;3DHotspot: no	MutationAssessor: NA;SIFT: impact: deleterious, score: 0.02;Polyphen-2: impact: benign, score: 0.249	MutationAssessor: NA	SIFT: NA	Polyphen-2: NA		Missense_Mutation	SNP	Diploid
PSMB7	Skin Cutaneous Melanoma (TCGA, PanCancer Atlas)	TCGA-FR-A3YN-06	SKCM	Melanoma	Cutaneous Melanoma	P37L		OncoKB: NA;CIViC: NA;MyCancerGenome: not present;CancerHotspot: no;3DHotspot: no	MutationAssessor: NA;SIFT: impact: deleterious, score: 0;Polyphen-2: impact: benign, score: 0.179	MutationAssessor: NA	SIFT: NA	Polyphen-2: NA		Missense_Mutation	SNP	Diploid
PSMB7	Skin Cutaneous Melanoma (TCGA, PanCancer Atlas)	TCGA-EE-A2MS-06	SKCM	Melanoma	Cutaneous Melanoma	N208S		OncoKB: NA;CIViC: NA;MyCancerGenome: not present;CancerHotspot: no;3DHotspot: no	MutationAssessor: NA;SIFT: impact: tolerated, score: 0.06;Polyphen-2: impact: possibly_damaging, score: 0.612	MutationAssessor: NA	SIFT: NA	Polyphen-2: NA		Missense_Mutation	SNP	Diploid
PSMB7	Skin Cutaneous Melanoma (TCGA, PanCancer Atlas)	TCGA-D3-A3C7-06	SKCM	Melanoma	Cutaneous Melanoma	G250W		OncoKB: NA;CIViC: NA;MyCancerGenome: not present;CancerHotspot: no;3DHotspot: no	MutationAssessor: NA;SIFT: impact: deleterious, score: 0;Polyphen-2: impact: probably_damaging, score: 1	MutationAssessor: NA	SIFT: NA	Polyphen-2: NA		Missense_Mutation	SNP	ShallowDel
PSMB7	Skin Cutaneous Melanoma (TCGA, PanCancer Atlas)	TCGA-ER-A19Q-06	SKCM	Melanoma	Cutaneous Melanoma	G250W		OncoKB: NA;CIViC: NA;MyCancerGenome: not present;CancerHotspot: no;3DHotspot: no	MutationAssessor: NA;SIFT: impact: deleterious, score: 0;Polyphen-2: impact: probably_damaging, score: 1	MutationAssessor: NA	SIFT: NA	Polyphen-2: NA		Missense_Mutation	SNP	ShallowDel
PSMB7	Skin Cutaneous Melanoma (TCGA, PanCancer Atlas)	TCGA-EE-A20F-06	SKCM	Melanoma	Cutaneous Melanoma	R20S		OncoKB: NA;CIViC: NA;MyCancerGenome: not present;CancerHotspot: no;3DHotspot: no	MutationAssessor: NA;SIFT: impact: tolerated, score: 0.31;Polyphen-2: impact: benign, score: 0.021	MutationAssessor: NA	SIFT: NA	Polyphen-2: NA		Missense_Mutation	SNP	ShallowDel
PSMB7	Skin Cutaneous Melanoma (TCGA, PanCancer Atlas)	TCGA-EE-A2GN-06	SKCM	Melanoma	Cutaneous Melanoma	E190D		OncoKB: NA;CIViC: NA;MyCancerGenome: not present;CancerHotspot: no;3DHotspot: no	MutationAssessor: NA;SIFT: impact: tolerated, score: 0.3;Polyphen-2: impact: benign, score: 0	MutationAssessor: NA	SIFT: NA	Polyphen-2: NA		Missense_Mutation	SNP	Gain
PSMB7	Skin Cutaneous Melanoma (TCGA, PanCancer Atlas)	TCGA-EE-A2ML-06	SKCM	Melanoma	Cutaneous Melanoma	E191*		OncoKB: NA;CIViC: NA;MyCancerGenome: not present;CancerHotspot: no;3DHotspot: no	MutationAssessor: NA;SIFT: NA;Polyphen-2: NA	MutationAssessor: NA	SIFT: NA	Polyphen-2: NA		Nonsense_Mutation	SNP	ShallowDel
PSMB7	Skin Cutaneous Melanoma (TCGA, PanCancer Atlas)	TCGA-GN-A262-06	SKCM	Melanoma	Cutaneous Melanoma	P9Q		OncoKB: NA;CIViC: NA;MyCancerGenome: not present;CancerHotspot: no;3DHotspot: no	MutationAssessor: NA;SIFT: impact: tolerated, score: 0.29;Polyphen-2: impact: benign, score: 0.001	MutationAssessor: NA	SIFT: NA	Polyphen-2: NA		Missense_Mutation	SNP	ShallowDel
PSMB7	Colorectal Adenocarcinoma (TCGA, PanCancer Atlas)	TCGA-A6-6654-01	COAD	Colorectal Adenocarcinoma	Colon Adenocarcinoma	T45I		OncoKB: NA;CIViC: NA;MyCancerGenome: not present;CancerHotspot: no;3DHotspot: no	MutationAssessor: NA;SIFT: impact: deleterious, score: 0;Polyphen-2: impact: probably_damaging, score: 0.999	MutationAssessor: NA	SIFT: NA	Polyphen-2: NA		Missense_Mutation	SNP	ShallowDel
PSMB7	Colorectal Adenocarcinoma (TCGA, PanCancer Atlas)	TCGA-G4-6628-01	COAD	Colorectal Adenocarcinoma	Colon Adenocarcinoma	A93V		OncoKB: NA;CIViC: NA;MyCancerGenome: not present;CancerHotspot: no;3DHotspot: no	MutationAssessor: NA;SIFT: impact: deleterious, score: 0;Polyphen-2: impact: probably_damaging, score: 0.998	MutationAssessor: NA	SIFT: NA	Polyphen-2: NA		Missense_Mutation	SNP	Diploid
PSMB7	Head and Neck Squamous Cell Carcinoma (TCGA, PanCancer Atlas)	TCGA-CV-7413-01	HNSC	Head and Neck Squamous Cell Carcinoma	Head and Neck Squamous Cell Carcinoma	G12E		OncoKB: NA;CIViC: NA;MyCancerGenome: not present;CancerHotspot: no;3DHotspot: no	MutationAssessor: NA;SIFT: impact: deleterious, score: 0;Polyphen-2: impact: possibly_damaging, score: 0.835	MutationAssessor: NA	SIFT: NA	Polyphen-2: NA		Missense_Mutation	SNP	ShallowDel
PSMB8	Brain Lower Grade Glioma (TCGA, PanCancer Atlas)	TCGA-DU-6392-01	LGG	Diffuse Glioma	Astrocytoma	L57M		OncoKB: NA;CIViC: NA;MyCancerGenome: not present;CancerHotspot: no;3DHotspot: no	MutationAssessor: NA;SIFT: NA;Polyphen-2: NA	MutationAssessor: NA	SIFT: NA	Polyphen-2: NA		Missense_Mutation	SNP	Diploid
PSMB8	Glioblastoma Multiforme (TCGA, PanCancer Atlas)	TCGA-06-0129-01	GBM	Glioblastoma	Glioblastoma Multiforme	V186M		OncoKB: NA;CIViC: NA;MyCancerGenome: not present;CancerHotspot: no;3DHotspot: no	MutationAssessor: NA;SIFT: NA;Polyphen-2: NA	MutationAssessor: NA	SIFT: NA	Polyphen-2: NA		Missense_Mutation	SNP	Diploid
PSMB8	Lung Squamous Cell Carcinoma (TCGA, PanCancer Atlas)	TCGA-56-7579-01	LUSC	Non-Small Cell Lung Cancer	Lung Squamous Cell Carcinoma	G115V		OncoKB: NA;CIViC: NA;MyCancerGenome: not present;CancerHotspot: no;3DHotspot: no	MutationAssessor: NA;SIFT: NA;Polyphen-2: NA	MutationAssessor: NA	SIFT: NA	Polyphen-2: NA		Missense_Mutation	SNP	ShallowDel
PSMB8	Lung Squamous Cell Carcinoma (TCGA, PanCancer Atlas)	TCGA-66-2757-01	LUSC	Non-Small Cell Lung Cancer	Lung Squamous Cell Carcinoma	X50_splice		OncoKB: NA;CIViC: NA;MyCancerGenome: not present;CancerHotspot: no;3DHotspot: no	MutationAssessor: NA;SIFT: NA;Polyphen-2: NA	MutationAssessor: NA	SIFT: NA	Polyphen-2: NA		Splice_Site	SNP	Gain
PSMB8	Lung Squamous Cell Carcinoma (TCGA, PanCancer Atlas)	TCGA-77-8136-01	LUSC	Non-Small Cell Lung Cancer	Lung Squamous Cell Carcinoma	S194L		OncoKB: NA;CIViC: NA;MyCancerGenome: not present;CancerHotspot: no;3DHotspot: no	MutationAssessor: NA;SIFT: NA;Polyphen-2: NA	MutationAssessor: NA	SIFT: NA	Polyphen-2: NA		Missense_Mutation	SNP	Diploid
PSMB8	Lung Squamous Cell Carcinoma (TCGA, PanCancer Atlas)	TCGA-NC-A5HM-01	LUSC	Non-Small Cell Lung Cancer	Lung Squamous Cell Carcinoma	L19F		OncoKB: NA;CIViC: NA;MyCancerGenome: not present;CancerHotspot: no;3DHotspot: no	MutationAssessor: NA;SIFT: NA;Polyphen-2: NA	MutationAssessor: NA	SIFT: NA	Polyphen-2: NA		Missense_Mutation	SNP	Gain
PSMB8	Bladder Urothelial Carcinoma (TCGA, PanCancer Atlas)	TCGA-FD-A6TD-01	BLCA	Bladder Urothelial Carcinoma	Bladder Urothelial Carcinoma	R216W		OncoKB: NA;CIViC: NA;MyCancerGenome: not present;CancerHotspot: no;3DHotspot: no	MutationAssessor: NA;SIFT: NA;Polyphen-2: NA	MutationAssessor: NA	SIFT: NA	Polyphen-2: NA		Missense_Mutation	SNP	Diploid
PSMB8	Bladder Urothelial Carcinoma (TCGA, PanCancer Atlas)	TCGA-DK-A1A7-01	BLCA	Bladder Urothelial Carcinoma	Bladder Urothelial Carcinoma	Q270*		OncoKB: NA;CIViC: NA;MyCancerGenome: not present;CancerHotspot: no;3DHotspot: no	MutationAssessor: NA;SIFT: NA;Polyphen-2: NA	MutationAssessor: NA	SIFT: NA	Polyphen-2: NA		Nonsense_Mutation	SNP	ShallowDel
PSMB8	Bladder Urothelial Carcinoma (TCGA, PanCancer Atlas)	TCGA-E7-A6MD-01	BLCA	Bladder Urothelial Carcinoma	Bladder Urothelial Carcinoma	L219V		OncoKB: NA;CIViC: NA;MyCancerGenome: not present;CancerHotspot: no;3DHotspot: no	MutationAssessor: NA;SIFT: NA;Polyphen-2: NA	MutationAssessor: NA	SIFT: NA	Polyphen-2: NA		Missense_Mutation	SNP	Diploid
PSMB8	Bladder Urothelial Carcinoma (TCGA, PanCancer Atlas)	TCGA-FJ-A3ZF-01	BLCA	Bladder Urothelial Carcinoma	Bladder Urothelial Carcinoma	K153N		OncoKB: NA;CIViC: NA;MyCancerGenome: not present;CancerHotspot: no;3DHotspot: no	MutationAssessor: NA;SIFT: NA;Polyphen-2: NA	MutationAssessor: NA	SIFT: NA	Polyphen-2: NA		Missense_Mutation	SNP	ShallowDel
PSMB8	Uterine Corpus Endometrial Carcinoma (TCGA, PanCancer Atlas)	TCGA-A5-A1OF-01	UCEC	Endometrial Carcinoma	Uterine Mixed Endometrial Carcinoma	G170D		OncoKB: NA;CIViC: NA;MyCancerGenome: not present;CancerHotspot: no;3DHotspot: no	MutationAssessor: NA;SIFT: NA;Polyphen-2: NA	MutationAssessor: NA	SIFT: NA	Polyphen-2: NA		Missense_Mutation	SNP	Diploid
PSMB8	Uterine Corpus Endometrial Carcinoma (TCGA, PanCancer Atlas)	TCGA-AX-A0J0-01	UCEC	Endometrial Carcinoma	Uterine Endometrioid Carcinoma	M251I		OncoKB: NA;CIViC: NA;MyCancerGenome: not present;CancerHotspot: no;3DHotspot: no	MutationAssessor: NA;SIFT: NA;Polyphen-2: NA	MutationAssessor: NA	SIFT: NA	Polyphen-2: NA		Missense_Mutation	SNP	Diploid
PSMB8	Uterine Corpus Endometrial Carcinoma (TCGA, PanCancer Atlas)	TCGA-EY-A2OM-01	UCEC	Endometrial Carcinoma	Uterine Endometrioid Carcinoma	R145H		OncoKB: NA;CIViC: NA;MyCancerGenome: not present;CancerHotspot: no;3DHotspot: no	MutationAssessor: NA;SIFT: NA;Polyphen-2: NA	MutationAssessor: NA	SIFT: NA	Polyphen-2: NA		Missense_Mutation	SNP	Diploid
PSMB8	Uterine Corpus Endometrial Carcinoma (TCGA, PanCancer Atlas)	TCGA-A5-A0G2-01	UCEC	Endometrial Carcinoma	Uterine Serous Carcinoma/Uterine Papillary Serous Carcinoma	R216Q		OncoKB: NA;CIViC: NA;MyCancerGenome: not present;CancerHotspot: no;3DHotspot: no	MutationAssessor: NA;SIFT: NA;Polyphen-2: NA	MutationAssessor: NA	SIFT: NA	Polyphen-2: NA		Missense_Mutation	SNP	Diploid
PSMB8	Uterine Corpus Endometrial Carcinoma (TCGA, PanCancer Atlas)	TCGA-A5-A0G2-01	UCEC	Endometrial Carcinoma	Uterine Serous Carcinoma/Uterine Papillary Serous Carcinoma	G166D		OncoKB: NA;CIViC: NA;MyCancerGenome: not present;CancerHotspot: no;3DHotspot: no	MutationAssessor: NA;SIFT: NA;Polyphen-2: NA	MutationAssessor: NA	SIFT: NA	Polyphen-2: NA		Missense_Mutation	SNP	Diploid
PSMB8	Uterine Corpus Endometrial Carcinoma (TCGA, PanCancer Atlas)	TCGA-A5-A0G2-01	UCEC	Endometrial Carcinoma	Uterine Serous Carcinoma/Uterine Papillary Serous Carcinoma	R136M		OncoKB: NA;CIViC: NA;MyCancerGenome: not present;CancerHotspot: no;3DHotspot: no	MutationAssessor: NA;SIFT: NA;Polyphen-2: NA	MutationAssessor: NA	SIFT: NA	Polyphen-2: NA		Missense_Mutation	SNP	Diploid
PSMB8	Uterine Corpus Endometrial Carcinoma (TCGA, PanCancer Atlas)	TCGA-A5-A1OF-01	UCEC	Endometrial Carcinoma	Uterine Mixed Endometrial Carcinoma	E223*		OncoKB: NA;CIViC: NA;MyCancerGenome: not present;CancerHotspot: no;3DHotspot: no	MutationAssessor: NA;SIFT: NA;Polyphen-2: NA	MutationAssessor: NA	SIFT: NA	Polyphen-2: NA		Nonsense_Mutation	SNP	Diploid
PSMB8	Uterine Corpus Endometrial Carcinoma (TCGA, PanCancer Atlas)	TCGA-AP-A1DK-01	UCEC	Endometrial Carcinoma	Uterine Endometrioid Carcinoma	G164D		OncoKB: NA;CIViC: NA;MyCancerGenome: not present;CancerHotspot: no;3DHotspot: no	MutationAssessor: NA;SIFT: NA;Polyphen-2: NA	MutationAssessor: NA	SIFT: NA	Polyphen-2: NA		Missense_Mutation	SNP	Diploid
PSMB8	Uterine Corpus Endometrial Carcinoma (TCGA, PanCancer Atlas)	TCGA-AP-A1DK-01	UCEC	Endometrial Carcinoma	Uterine Endometrioid Carcinoma	L114I		OncoKB: NA;CIViC: NA;MyCancerGenome: not present;CancerHotspot: no;3DHotspot: no	MutationAssessor: NA;SIFT: NA;Polyphen-2: NA	MutationAssessor: NA	SIFT: NA	Polyphen-2: NA		Missense_Mutation	SNP	Diploid
PSMB8	Uterine Corpus Endometrial Carcinoma (TCGA, PanCancer Atlas)	TCGA-AX-A1CE-01	UCEC	Endometrial Carcinoma	Uterine Endometrioid Carcinoma	H269Y		OncoKB: NA;CIViC: NA;MyCancerGenome: not present;CancerHotspot: no;3DHotspot: no	MutationAssessor: NA;SIFT: NA;Polyphen-2: NA	MutationAssessor: NA	SIFT: NA	Polyphen-2: NA		Missense_Mutation	SNP	Diploid
PSMB8	Uterine Corpus Endometrial Carcinoma (TCGA, PanCancer Atlas)	TCGA-AX-A1CE-01	UCEC	Endometrial Carcinoma	Uterine Endometrioid Carcinoma	E253D		OncoKB: NA;CIViC: NA;MyCancerGenome: not present;CancerHotspot: no;3DHotspot: no	MutationAssessor: NA;SIFT: NA;Polyphen-2: NA	MutationAssessor: NA	SIFT: NA	Polyphen-2: NA		Missense_Mutation	SNP	Diploid
PSMB8	Uterine Corpus Endometrial Carcinoma (TCGA, PanCancer Atlas)	TCGA-B5-A3FC-01	UCEC	Endometrial Carcinoma	Uterine Endometrioid Carcinoma	X63_splice		OncoKB: NA;CIViC: NA;MyCancerGenome: not present;CancerHotspot: no;3DHotspot: no	MutationAssessor: NA;SIFT: NA;Polyphen-2: NA	MutationAssessor: NA	SIFT: NA	Polyphen-2: NA		Splice_Region	SNP	Diploid
PSMB8	Uterine Corpus Endometrial Carcinoma (TCGA, PanCancer Atlas)	TCGA-EO-A22U-01	UCEC	Endometrial Carcinoma	Uterine Endometrioid Carcinoma	G244D		OncoKB: NA;CIViC: NA;MyCancerGenome: not present;CancerHotspot: no;3DHotspot: no	MutationAssessor: NA;SIFT: NA;Polyphen-2: NA	MutationAssessor: NA	SIFT: NA	Polyphen-2: NA		Missense_Mutation	SNP	Diploid
PSMB8	Skin Cutaneous Melanoma (TCGA, PanCancer Atlas)	TCGA-EE-A2MS-06	SKCM	Melanoma	Cutaneous Melanoma	M197V		OncoKB: NA;CIViC: NA;MyCancerGenome: not present;CancerHotspot: no;3DHotspot: no	MutationAssessor: NA;SIFT: NA;Polyphen-2: NA	MutationAssessor: NA	SIFT: impact: deleterious, score: 0.01	Polyphen-2: impact: probably_damaging	1	Missense_Mutation	SNP	Gain
PSMB8	Skin Cutaneous Melanoma (TCGA, PanCancer Atlas)	TCGA-EE-A2GR-06	SKCM	Melanoma	Cutaneous Melanoma	G203E		OncoKB: NA;CIViC: NA;MyCancerGenome: not present;CancerHotspot: no;3DHotspot: no	MutationAssessor: NA;SIFT: NA;Polyphen-2: NA	MutationAssessor: NA	SIFT: NA	Polyphen-2: NA		Missense_Mutation	SNP	Gain
PSMB8	Skin Cutaneous Melanoma (TCGA, PanCancer Atlas)	TCGA-EE-A29V-06	SKCM	Melanoma	Cutaneous Melanoma	A132V		OncoKB: NA;CIViC: NA;MyCancerGenome: not present;CancerHotspot: no;3DHotspot: no	MutationAssessor: NA;SIFT: NA;Polyphen-2: NA	MutationAssessor: NA	SIFT: NA	Polyphen-2: NA		Missense_Mutation	SNP	ShallowDel
PSMB8	Skin Cutaneous Melanoma (TCGA, PanCancer Atlas)	TCGA-ER-A2NC-06	SKCM	Melanoma	Cutaneous Melanoma	R216W		OncoKB: NA;CIViC: NA;MyCancerGenome: not present;CancerHotspot: no;3DHotspot: no	MutationAssessor: NA;SIFT: NA;Polyphen-2: NA	MutationAssessor: NA	SIFT: NA	Polyphen-2: NA		Missense_Mutation	SNP	Gain
PSMB8	Skin Cutaneous Melanoma (TCGA, PanCancer Atlas)	TCGA-D3-A3CE-06	SKCM	Melanoma	Cutaneous Melanoma	W176L		OncoKB: NA;CIViC: NA;MyCancerGenome: not present;CancerHotspot: no;3DHotspot: no	MutationAssessor: NA;SIFT: NA;Polyphen-2: NA	MutationAssessor: NA	SIFT: NA	Polyphen-2: NA		Missense_Mutation	SNP	Diploid
PSMB8	Skin Cutaneous Melanoma (TCGA, PanCancer Atlas)	TCGA-D3-A8GI-06	SKCM	Melanoma	Cutaneous Melanoma	G143E		OncoKB: NA;CIViC: NA;MyCancerGenome: not present;CancerHotspot: no;3DHotspot: no	MutationAssessor: NA;SIFT: NA;Polyphen-2: NA	MutationAssessor: NA	SIFT: NA	Polyphen-2: NA		Missense_Mutation	SNP	ShallowDel
PSMB8	Skin Cutaneous Melanoma (TCGA, PanCancer Atlas)	TCGA-DA-A1I1-06	SKCM	Melanoma	Cutaneous Melanoma	R102L		OncoKB: NA;CIViC: NA;MyCancerGenome: not present;CancerHotspot: no;3DHotspot: no	MutationAssessor: NA;SIFT: NA;Polyphen-2: NA	MutationAssessor: NA	SIFT: impact: tolerated, score: 0.51	Polyphen-2: impact: benign	0.02	Missense_Mutation	SNP	Gain
PSMB8	Skin Cutaneous Melanoma (TCGA, PanCancer Atlas)	TCGA-EE-A2MQ-06	SKCM	Melanoma	Cutaneous Melanoma	R102L		OncoKB: NA;CIViC: NA;MyCancerGenome: not present;CancerHotspot: no;3DHotspot: no	MutationAssessor: NA;SIFT: NA;Polyphen-2: NA	MutationAssessor: NA	SIFT: impact: tolerated, score: 0.59	Polyphen-2: impact: benign	0.01	Missense_Mutation	SNP	Gain
PSMB8	Skin Cutaneous Melanoma (TCGA, PanCancer Atlas)	TCGA-FS-A1ZG-06	SKCM	Melanoma	Cutaneous Melanoma	R102L		OncoKB: NA;CIViC: NA;MyCancerGenome: not present;CancerHotspot: no;3DHotspot: no	MutationAssessor: NA;SIFT: NA;Polyphen-2: NA	MutationAssessor: NA	SIFT: NA	Polyphen-2: NA		Missense_Mutation	SNP	Gain
PSMB8	Skin Cutaneous Melanoma (TCGA, PanCancer Atlas)	TCGA-GN-A265-06	SKCM	Melanoma	Cutaneous Melanoma	R102L		OncoKB: NA;CIViC: NA;MyCancerGenome: not present;CancerHotspot: no;3DHotspot: no	MutationAssessor: NA;SIFT: NA;Polyphen-2: NA	MutationAssessor: NA	SIFT: impact: deleterious, score: 0.05	Polyphen-2: impact: probably_damaging	0.99	Missense_Mutation	SNP	Diploid
PSMB8	Skin Cutaneous Melanoma (TCGA, PanCancer Atlas)	TCGA-EE-A2GN-06	SKCM	Melanoma	Cutaneous Melanoma	K105N		OncoKB: NA;CIViC: NA;MyCancerGenome: not present;CancerHotspot: no;3DHotspot: no	MutationAssessor: NA;SIFT: NA;Polyphen-2: NA	MutationAssessor: NA	SIFT: impact: deleterious, score: 0.05	Polyphen-2: impact: probably_damaging	0.99	Missense_Mutation	SNP	Amp
PSMB8	Skin Cutaneous Melanoma (TCGA, PanCancer Atlas)	TCGA-ER-A2NH-06	SKCM	Melanoma	Cutaneous Melanoma	G166C		OncoKB: NA;CIViC: NA;MyCancerGenome: not present;CancerHotspot: no;3DHotspot: no	MutationAssessor: NA;SIFT: NA;Polyphen-2: NA	MutationAssessor: NA	SIFT: NA	Polyphen-2: NA		Missense_Mutation	SNP	Diploid
PSMB8	Skin Cutaneous Melanoma (TCGA, PanCancer Atlas)	TCGA-W3-AA1R-06	SKCM	Melanoma	Cutaneous Melanoma	A207V		OncoKB: NA;CIViC: NA;MyCancerGenome: not present;CancerHotspot: no;3DHotspot: no	MutationAssessor: NA;SIFT: NA;Polyphen-2: NA	MutationAssessor: NA	SIFT: NA	Polyphen-2: NA		Missense_Mutation	SNP	Gain
PSMB8	Stomach Adenocarcinoma (TCGA, PanCancer Atlas)	TCGA-CD-8536-01	STAD	Esophagogastric Adenocarcinoma	Stomach Adenocarcinoma	S149L		OncoKB: NA;CIViC: NA;MyCancerGenome: not present;CancerHotspot: no;3DHotspot: no	MutationAssessor: NA;SIFT: NA;Polyphen-2: NA	MutationAssessor: NA	SIFT: impact: deleterious, score: 0	Polyphen-2: impact: possibly_damaging	0.84	Missense_Mutation	SNP	Diploid
PSMB8	Stomach Adenocarcinoma (TCGA, PanCancer Atlas)	TCGA-BR-4201-01	STAD	Esophagogastric Adenocarcinoma	Stomach Adenocarcinoma	T191N		OncoKB: NA;CIViC: NA;MyCancerGenome: not present;CancerHotspot: no;3DHotspot: no	MutationAssessor: NA;SIFT: NA;Polyphen-2: NA	MutationAssessor: NA	SIFT: NA	Polyphen-2: NA		Missense_Mutation	SNP	Diploid
PSMB8	Stomach Adenocarcinoma (TCGA, PanCancer Atlas)	TCGA-BR-4361-01	STAD	Esophagogastric Adenocarcinoma	Stomach Adenocarcinoma	R129H		OncoKB: NA;CIViC: NA;MyCancerGenome: not present;CancerHotspot: no;3DHotspot: no	MutationAssessor: NA;SIFT: NA;Polyphen-2: NA	MutationAssessor: NA	SIFT: NA	Polyphen-2: NA		Missense_Mutation	SNP	DeepDel
PSMB8	Stomach Adenocarcinoma (TCGA, PanCancer Atlas)	TCGA-HF-7132-01	STAD	Esophagogastric Adenocarcinoma	Mucinous Stomach Adenocarcinoma	R11Pfs*58		OncoKB: NA;CIViC: NA;MyCancerGenome: not present;CancerHotspot: no;3DHotspot: no	MutationAssessor: NA;SIFT: NA;Polyphen-2: NA	MutationAssessor: NA	SIFT: NA	Polyphen-2: NA		Frame_Shift_Ins	INS	Diploid
PSMB8	Breast Invasive Carcinoma (TCGA, PanCancer Atlas)	TCGA-XX-A89A-01	BRCA	Invasive Breast Carcinoma	Breast Invasive Lobular Carcinoma	S149L		OncoKB: NA;CIViC: NA;MyCancerGenome: not present;CancerHotspot: no;3DHotspot: no	MutationAssessor: NA;SIFT: NA;Polyphen-2: NA	MutationAssessor: NA	SIFT: NA	Polyphen-2: NA		Missense_Mutation	SNP	Diploid
PSMB8	Breast Invasive Carcinoma (TCGA, PanCancer Atlas)	TCGA-A8-A093-01	BRCA	Invasive Breast Carcinoma	Breast Invasive Ductal Carcinoma	R216W		OncoKB: NA;CIViC: NA;MyCancerGenome: not present;CancerHotspot: no;3DHotspot: no	MutationAssessor: NA;SIFT: NA;Polyphen-2: NA	MutationAssessor: NA	SIFT: NA	Polyphen-2: NA		Missense_Mutation	SNP	Diploid
PSMB8	Colorectal Adenocarcinoma (TCGA, PanCancer Atlas)	TCGA-AG-3598-01	READ	Colorectal Adenocarcinoma	Rectal Adenocarcinoma	G25W		OncoKB: NA;CIViC: NA;MyCancerGenome: not present;CancerHotspot: no;3DHotspot: no	MutationAssessor: NA;SIFT: NA;Polyphen-2: NA	MutationAssessor: NA	SIFT: NA	Polyphen-2: NA		Missense_Mutation	SNP	Diploid
PSMB8	Colorectal Adenocarcinoma (TCGA, PanCancer Atlas)	TCGA-AG-3892-01	READ	Colorectal Adenocarcinoma	Rectal Adenocarcinoma	Q276K		OncoKB: NA;CIViC: NA;MyCancerGenome: not present;CancerHotspot: no;3DHotspot: no	MutationAssessor: NA;SIFT: NA;Polyphen-2: NA	MutationAssessor: NA	SIFT: NA	Polyphen-2: NA		Missense_Mutation	SNP	Diploid
PSMB8	Colorectal Adenocarcinoma (TCGA, PanCancer Atlas)	TCGA-AG-A015-01	READ	Colorectal Adenocarcinoma	Rectal Adenocarcinoma	G58C		OncoKB: NA;CIViC: NA;MyCancerGenome: not present;CancerHotspot: no;3DHotspot: no	MutationAssessor: NA;SIFT: NA;Polyphen-2: NA	MutationAssessor: NA	SIFT: NA	Polyphen-2: NA		Missense_Mutation	SNP	Gain
PSMB8	Colorectal Adenocarcinoma (TCGA, PanCancer Atlas)	TCGA-F5-6814-01	READ	Colorectal Adenocarcinoma	Rectal Adenocarcinoma	S149L		OncoKB: NA;CIViC: NA;MyCancerGenome: not present;CancerHotspot: no;3DHotspot: no	MutationAssessor: NA;SIFT: NA;Polyphen-2: NA	MutationAssessor: NA	SIFT: NA	Polyphen-2: NA		Missense_Mutation	SNP	Diploid
PSMB8	Colorectal Adenocarcinoma (TCGA, PanCancer Atlas)	TCGA-AZ-4315-01	COAD	Colorectal Adenocarcinoma	Colon Adenocarcinoma	R141Q		OncoKB: NA;CIViC: NA;MyCancerGenome: not present;CancerHotspot: no;3DHotspot: no	MutationAssessor: NA;SIFT: NA;Polyphen-2: NA	MutationAssessor: NA	SIFT: NA	Polyphen-2: NA		Missense_Mutation	SNP	Diploid
PSMB8	Colorectal Adenocarcinoma (TCGA, PanCancer Atlas)	TCGA-AZ-6598-01	COAD	Colorectal Adenocarcinoma	Colon Adenocarcinoma	R11Efs*74		OncoKB: NA;CIViC: NA;MyCancerGenome: not present;CancerHotspot: no;3DHotspot: no	MutationAssessor: NA;SIFT: NA;Polyphen-2: NA	MutationAssessor: NA	SIFT: NA	Polyphen-2: NA		Frame_Shift_Del	DEL	Diploid
PSMB8	Colorectal Adenocarcinoma (TCGA, PanCancer Atlas)	TCGA-CM-5861-01	COAD	Colorectal Adenocarcinoma	Colon Adenocarcinoma	R11Efs*74		OncoKB: NA;CIViC: NA;MyCancerGenome: not present;CancerHotspot: no;3DHotspot: no	MutationAssessor: NA;SIFT: NA;Polyphen-2: NA	MutationAssessor: NA	SIFT: NA	Polyphen-2: NA		Frame_Shift_Del	DEL	Diploid
PSMB8	Colorectal Adenocarcinoma (TCGA, PanCancer Atlas)	TCGA-A6-5661-01	COAD	Colorectal Adenocarcinoma	Colon Adenocarcinoma	R141*		OncoKB: NA;CIViC: NA;MyCancerGenome: not present;CancerHotspot: no;3DHotspot: no	MutationAssessor: NA;SIFT: NA;Polyphen-2: NA	MutationAssessor: NA	SIFT: NA	Polyphen-2: NA		Nonsense_Mutation	SNP	Diploid
PSMB8	Colorectal Adenocarcinoma (TCGA, PanCancer Atlas)	TCGA-AA-3489-01	COAD	Colorectal Adenocarcinoma	Colon Adenocarcinoma	X63_splice		OncoKB: NA;CIViC: NA;MyCancerGenome: not present;CancerHotspot: no;3DHotspot: no	MutationAssessor: NA;SIFT: NA;Polyphen-2: NA	MutationAssessor: NA	SIFT: NA	Polyphen-2: NA		Splice_Region	SNP	Diploid
PSMB8	Kidney Renal Papillary Cell Carcinoma (TCGA, PanCancer Atlas)	TCGA-2Z-A9JT-01	KIRP	Renal Non-Clear Cell Carcinoma	Papillary Renal Cell Carcinoma	R216L		OncoKB: NA;CIViC: NA;MyCancerGenome: not present;CancerHotspot: no;3DHotspot: no	MutationAssessor: NA;SIFT: NA;Polyphen-2: NA	MutationAssessor: NA	SIFT: NA	Polyphen-2: NA		Missense_Mutation	SNP	Diploid
PSMB8	Head and Neck Squamous Cell Carcinoma (TCGA, PanCancer Atlas)	TCGA-CV-7102-01	HNSC	Head and Neck Squamous Cell Carcinoma	Head and Neck Squamous Cell Carcinoma	A274S		OncoKB: NA;CIViC: NA;MyCancerGenome: not present;CancerHotspot: no;3DHotspot: no	MutationAssessor: NA;SIFT: NA;Polyphen-2: NA	MutationAssessor: NA	SIFT: impact: deleterious_low_confidence, score: 0.01	Polyphen-2: impact: benign	0.02	Missense_Mutation	SNP	Diploid
PSMB8	Head and Neck Squamous Cell Carcinoma (TCGA, PanCancer Atlas)	TCGA-CV-7103-01	HNSC	Head and Neck Squamous Cell Carcinoma	Head and Neck Squamous Cell Carcinoma	K133N		OncoKB: NA;CIViC: NA;MyCancerGenome: not present;CancerHotspot: no;3DHotspot: no	MutationAssessor: NA;SIFT: NA;Polyphen-2: NA	MutationAssessor: NA	SIFT: impact: deleterious, score: 0	Polyphen-2: impact: probably_damaging	0.97	Missense_Mutation	SNP	ShallowDel
PSMB8	Cervical Squamous Cell Carcinoma (TCGA, PanCancer Atlas)	TCGA-EA-A3HU-01	CESC	Cervical Squamous Cell Carcinoma	Cervical Squamous Cell Carcinoma	S171I		OncoKB: NA;CIViC: NA;MyCancerGenome: not present;CancerHotspot: no;3DHotspot: no	MutationAssessor: NA;SIFT: NA;Polyphen-2: NA	MutationAssessor: NA	SIFT: impact: tolerated, score: 0.19	Polyphen-2: impact: benign	0.17	Missense_Mutation	SNP
PSMB8	Cervical Squamous Cell Carcinoma (TCGA, PanCancer Atlas)	TCGA-JX-A3Q0-01	CESC	Cervical Squamous Cell Carcinoma	Cervical Squamous Cell Carcinoma	R102W		OncoKB: NA;CIViC: NA;MyCancerGenome: not present;CancerHotspot: no;3DHotspot: no	MutationAssessor: NA;SIFT: NA;Polyphen-2: NA	MutationAssessor: NA	SIFT: impact: deleterious, score: 0	Polyphen-2: impact: possibly_damaging	0.79	Missense_Mutation	SNP	Diploid
PSMB8	Cervical Squamous Cell Carcinoma (TCGA, PanCancer Atlas)	TCGA-C5-A1M8-01	CESC	Cervical Squamous Cell Carcinoma	Cervical Squamous Cell Carcinoma	G58S		OncoKB: NA;CIViC: NA;MyCancerGenome: not present;CancerHotspot: no;3DHotspot: no	MutationAssessor: NA;SIFT: NA;Polyphen-2: NA	MutationAssessor: NA	SIFT: impact: tolerated, score: 0.08	Polyphen-2: impact: probably_damaging	1	Missense_Mutation	SNP	ShallowDel
PSMB8	Cervical Squamous Cell Carcinoma (TCGA, PanCancer Atlas)	TCGA-DS-A0VK-01	CESC	Cervical Squamous Cell Carcinoma	Cervical Squamous Cell Carcinoma	E52K		OncoKB: NA;CIViC: NA;MyCancerGenome: not present;CancerHotspot: no;3DHotspot: no	MutationAssessor: NA;SIFT: NA;Polyphen-2: NA	MutationAssessor: NA	SIFT: impact: tolerated, score: 0.12	Polyphen-2: impact: possibly_damaging	0.53	Missense_Mutation	SNP	ShallowDel
PSMB9	Adrenocortical Carcinoma (TCGA, PanCancer Atlas)	TCGA-OR-A5JA-01	ACC	Adrenocortical Carcinoma	Adrenocortical Carcinoma	A100E		OncoKB: NA;CIViC: NA;MyCancerGenome: not present;CancerHotspot: no;3DHotspot: no	MutationAssessor: NA;SIFT: NA;Polyphen-2: NA	MutationAssessor: NA	SIFT: impact: deleterious, score: 0.03	Polyphen-2: impact: benign	0.03	Missense_Mutation	SNP	Gain
PSMB9	Ovarian Serous Cystadenocarcinoma (TCGA, PanCancer Atlas)	TCGA-29-1710-01	OV	Ovarian Epithelial Tumor	Serous Ovarian Cancer	L181V		OncoKB: NA;CIViC: NA;MyCancerGenome: not present;CancerHotspot: no;3DHotspot: no	MutationAssessor: NA;SIFT: impact: deleterious, score: 0.01;Polyphen-2: impact: probably_damaging, score: 0.999	MutationAssessor: NA	SIFT: impact: deleterious, score: 0.01	Polyphen-2: impact: possibly_damaging	0.51	Missense_Mutation	SNP	Gain
PSMB9	Glioblastoma Multiforme (TCGA, PanCancer Atlas)	TCGA-15-1446-01	GBM	Glioblastoma	Glioblastoma Multiforme	G156Vfs*28		OncoKB: NA;CIViC: NA;MyCancerGenome: not present;CancerHotspot: no;3DHotspot: no	MutationAssessor: NA;SIFT: NA;Polyphen-2: NA	MutationAssessor: NA	SIFT: impact: deleterious, score: 0	Polyphen-2: impact: probably_damaging	1	Frame_Shift_Del	DEL	Diploid
PSMB9	Glioblastoma Multiforme (TCGA, PanCancer Atlas)	TCGA-19-5956-01	GBM	Glioblastoma	Glioblastoma Multiforme	R39Q		OncoKB: NA;CIViC: NA;MyCancerGenome: not present;CancerHotspot: no;3DHotspot: no	MutationAssessor: NA;SIFT: NA;Polyphen-2: NA	MutationAssessor: NA	SIFT: impact: tolerated, score: 0.38	Polyphen-2: impact: benign	0	Missense_Mutation	SNP	Diploid
PSMB9	Glioblastoma Multiforme (TCGA, PanCancer Atlas)	TCGA-19-5956-01	GBM	Glioblastoma	Glioblastoma Multiforme	V75M		OncoKB: NA;CIViC: NA;MyCancerGenome: not present;CancerHotspot: no;3DHotspot: no	MutationAssessor: NA;SIFT: NA;Polyphen-2: NA	MutationAssessor: NA	SIFT: impact: deleterious, score: 0	Polyphen-2: impact: possibly_damaging	0.88	Missense_Mutation	SNP	Diploid
PSMB9	Sarcoma (TCGA, PanCancer Atlas)	TCGA-X6-A8C3-01	SARC	Sarcoma	Myxofibrosarcoma	A42S		OncoKB: NA;CIViC: NA;MyCancerGenome: not present;CancerHotspot: no;3DHotspot: no	MutationAssessor: NA;SIFT: NA;Polyphen-2: NA	MutationAssessor: NA	SIFT: impact: deleterious, score: 0	Polyphen-2: impact: probably_damaging	1	Missense_Mutation	SNP	ShallowDel
PSMB9	Bladder Urothelial Carcinoma (TCGA, PanCancer Atlas)	TCGA-CF-A3MH-01	BLCA	Bladder Urothelial Carcinoma	Bladder Urothelial Carcinoma	D77N		OncoKB: NA;CIViC: NA;MyCancerGenome: not present;CancerHotspot: no;3DHotspot: no	MutationAssessor: NA;SIFT: NA;Polyphen-2: NA	MutationAssessor: NA	SIFT: impact: deleterious, score: 0	Polyphen-2: impact: probably_damaging	1	Missense_Mutation	SNP	Diploid
PSMB9	Bladder Urothelial Carcinoma (TCGA, PanCancer Atlas)	TCGA-LT-A5Z6-01	BLCA	Bladder Urothelial Carcinoma	Bladder Urothelial Carcinoma	V131=		OncoKB: NA;CIViC: NA;MyCancerGenome: not present;CancerHotspot: no;3DHotspot: no	MutationAssessor: NA;SIFT: NA;Polyphen-2: NA	MutationAssessor: NA	SIFT: impact: deleterious, score: 0.02	Polyphen-2: impact: benign	score: 0	Splice_Region	SNP	Gain
PSMB9	Bladder Urothelial Carcinoma (TCGA, PanCancer Atlas)	TCGA-XF-A8HD-01	BLCA	Bladder Urothelial Carcinoma	Bladder Urothelial Carcinoma	M183I		OncoKB: NA;CIViC: NA;MyCancerGenome: not present;CancerHotspot: no;3DHotspot: no	MutationAssessor: NA;SIFT: impact: tolerated, score: 0.51;Polyphen-2: impact: benign, score: 0.018	MutationAssessor: NA	SIFT: impact: deleterious, score: 0	Polyphen-2: impact: benign	0.13	Missense_Mutation	SNP	Gain
PSMB9	Bladder Urothelial Carcinoma (TCGA, PanCancer Atlas)	TCGA-YF-AA3M-01	BLCA	Bladder Urothelial Carcinoma	Bladder Urothelial Carcinoma	I208V		OncoKB: NA;CIViC: NA;MyCancerGenome: not present;CancerHotspot: no;3DHotspot: no	MutationAssessor: NA;SIFT: impact: tolerated, score: 0.59;Polyphen-2: impact: benign, score: 0.009	MutationAssessor: NA	SIFT: impact: tolerated, score: 0.08	Polyphen-2: impact: benign	0	Missense_Mutation	SNP	Gain
PSMB9	Bladder Urothelial Carcinoma (TCGA, PanCancer Atlas)	TCGA-ZF-AA53-01	BLCA	Bladder Urothelial Carcinoma	Bladder Urothelial Carcinoma	X178_splice		OncoKB: NA;CIViC: NA;MyCancerGenome: not present;CancerHotspot: no;3DHotspot: no	MutationAssessor: NA;SIFT: NA;Polyphen-2: NA	MutationAssessor: NA	SIFT: NA	Polyphen-2: NA		Splice_Region	INS	ShallowDel
PSMB9	Liver Hepatocellular Carcinoma (TCGA, PanCancer Atlas)	TCGA-CC-A5UD-01	LIHC	Hepatocellular Carcinoma	Hepatocellular Carcinoma	S151C		OncoKB: NA;CIViC: NA;MyCancerGenome: not present;CancerHotspot: no;3DHotspot: no	MutationAssessor: NA;SIFT: NA;Polyphen-2: NA	MutationAssessor: NA	SIFT: impact: deleterious, score: 0.05	Polyphen-2: impact: benign	0.34	Missense_Mutation	SNP	ShallowDel
PSMB9	Uterine Corpus Endometrial Carcinoma (TCGA, PanCancer Atlas)	TCGA-B5-A3FC-01	UCEC	Endometrial Carcinoma	Uterine Endometrioid Carcinoma	G43=		OncoKB: NA;CIViC: NA;MyCancerGenome: not present;CancerHotspot: no;3DHotspot: no	MutationAssessor: NA;SIFT: NA;Polyphen-2: NA	MutationAssessor: NA	SIFT: impact: tolerated, score: 0.19	Polyphen-2: impact: benign	score: 0.17	Splice_Region	SNP	Diploid
PSMB9	Uterine Corpus Endometrial Carcinoma (TCGA, PanCancer Atlas)	TCGA-EO-A3B0-01	UCEC	Endometrial Carcinoma	Uterine Endometrioid Carcinoma	G43=		OncoKB: NA;CIViC: NA;MyCancerGenome: not present;CancerHotspot: no;3DHotspot: no	MutationAssessor: NA;SIFT: NA;Polyphen-2: NA	MutationAssessor: NA	SIFT: impact: tolerated, score: 0.13	Polyphen-2: impact: probably_damaging	score: 0.999	Splice_Region	SNP	Diploid
PSMB9	Uterine Corpus Endometrial Carcinoma (TCGA, PanCancer Atlas)	TCGA-AX-A0J0-01	UCEC	Endometrial Carcinoma	Uterine Endometrioid Carcinoma	F216L		OncoKB: NA;CIViC: NA;MyCancerGenome: not present;CancerHotspot: no;3DHotspot: no	MutationAssessor: NA;SIFT: impact: deleterious, score: 0.05;Polyphen-2: impact: probably_damaging, score: 0.987	MutationAssessor: NA	SIFT: impact: tolerated, score: 0.09	Polyphen-2: impact: benign	0.09	Missense_Mutation	SNP	Diploid
PSMB9	Uterine Corpus Endometrial Carcinoma (TCGA, PanCancer Atlas)	TCGA-EY-A1GD-01	UCEC	Endometrial Carcinoma	Uterine Endometrioid Carcinoma	F216L		OncoKB: NA;CIViC: NA;MyCancerGenome: not present;CancerHotspot: no;3DHotspot: no	MutationAssessor: NA;SIFT: impact: deleterious, score: 0.05;Polyphen-2: impact: probably_damaging, score: 0.987	MutationAssessor: NA	SIFT: impact: deleterious, score: 0.03	Polyphen-2: impact: benign	0	Missense_Mutation	SNP	Diploid
PSMB9	Uterine Corpus Endometrial Carcinoma (TCGA, PanCancer Atlas)	TCGA-SJ-A6ZI-01	UCEC	Endometrial Carcinoma	Uterine Endometrioid Carcinoma	R111*		OncoKB: NA;CIViC: NA;MyCancerGenome: not present;CancerHotspot: no;3DHotspot: no	MutationAssessor: NA;SIFT: NA;Polyphen-2: NA	MutationAssessor: NA	SIFT: impact: deleterious, score: 0	Polyphen-2: impact: benign	0.31	Nonsense_Mutation	SNP	Diploid
PSMB9	Uterine Corpus Endometrial Carcinoma (TCGA, PanCancer Atlas)	TCGA-A5-A2K5-01	UCEC	Endometrial Carcinoma	Uterine Endometrioid Carcinoma	R49*		OncoKB: NA;CIViC: NA;MyCancerGenome: not present;CancerHotspot: no;3DHotspot: no	MutationAssessor: NA;SIFT: NA;Polyphen-2: NA	MutationAssessor: NA	SIFT: impact: deleterious, score: 0.03	Polyphen-2: impact: benign	0.06	Nonsense_Mutation	SNP	Diploid
PSMB9	Uterine Corpus Endometrial Carcinoma (TCGA, PanCancer Atlas)	TCGA-AX-A1C5-01	UCEC	Endometrial Carcinoma	Uterine Endometrioid Carcinoma	D218H		OncoKB: NA;CIViC: NA;MyCancerGenome: not present;CancerHotspot: no;3DHotspot: no	MutationAssessor: NA;SIFT: impact: deleterious, score: 0;Polyphen-2: impact: possibly_damaging, score: 0.841	MutationAssessor: NA	SIFT: impact: deleterious, score: 0	Polyphen-2: impact: probably_damaging	1	Missense_Mutation	SNP	Diploid
PSMB9	Uterine Corpus Endometrial Carcinoma (TCGA, PanCancer Atlas)	TCGA-EO-A22U-01	UCEC	Endometrial Carcinoma	Uterine Endometrioid Carcinoma	R173H		OncoKB: NA;CIViC: NA;MyCancerGenome: not present;CancerHotspot: no;3DHotspot: no	MutationAssessor: NA;SIFT: NA;Polyphen-2: NA	MutationAssessor: NA	SIFT: impact: deleterious, score: 0	Polyphen-2: impact: possibly_damaging	0.79	Missense_Mutation	SNP	Diploid
PSMB9	Uterine Corpus Endometrial Carcinoma (TCGA, PanCancer Atlas)	TCGA-FI-A2D5-01	UCEC	Endometrial Carcinoma	Uterine Endometrioid Carcinoma	R3W		OncoKB: NA;CIViC: NA;MyCancerGenome: not present;CancerHotspot: no;3DHotspot: no	MutationAssessor: NA;SIFT: NA;Polyphen-2: NA	MutationAssessor: NA	SIFT: impact: tolerated, score: 0.1	Polyphen-2: impact: possibly_damaging	0.78	Missense_Mutation	SNP	Diploid
PSMB9	Uterine Corpus Endometrial Carcinoma (TCGA, PanCancer Atlas)	TCGA-FI-A2D5-01	UCEC	Endometrial Carcinoma	Uterine Endometrioid Carcinoma	G165D		OncoKB: NA;CIViC: NA;MyCancerGenome: not present;CancerHotspot: no;3DHotspot: no	MutationAssessor: NA;SIFT: NA;Polyphen-2: NA	MutationAssessor: NA	SIFT: impact: tolerated_low_confidence, score: 0.2	Polyphen-2: impact: benign	0.22	Missense_Mutation	SNP	Diploid
PSMB9	Skin Cutaneous Melanoma (TCGA, PanCancer Atlas)	TCGA-D9-A4Z3-01	SKCM	Melanoma	Cutaneous Melanoma	X178_splice		OncoKB: NA;CIViC: NA;MyCancerGenome: not present;CancerHotspot: no;3DHotspot: no	MutationAssessor: NA;SIFT: NA;Polyphen-2: NA	MutationAssessor: NA	SIFT: impact: deleterious, score: 0.05	Polyphen-2: impact: probably_damaging	score: 1	Splice_Region	SNP
PSMB9	Stomach Adenocarcinoma (TCGA, PanCancer Atlas)	TCGA-BR-7851-01	STAD	Esophagogastric Adenocarcinoma	Intestinal Type Stomach Adenocarcinoma	G128E		OncoKB: NA;CIViC: NA;MyCancerGenome: not present;CancerHotspot: no;3DHotspot: no	MutationAssessor: NA;SIFT: NA;Polyphen-2: NA	MutationAssessor: NA	SIFT: impact: deleterious, score: 0	Polyphen-2: impact: possibly_damaging	0.89	Missense_Mutation	SNP	Diploid
PSMB9	Stomach Adenocarcinoma (TCGA, PanCancer Atlas)	TCGA-BR-8361-01	STAD	Esophagogastric Adenocarcinoma	Stomach Adenocarcinoma	A42=		OncoKB: NA;CIViC: NA;MyCancerGenome: not present;CancerHotspot: no;3DHotspot: no	MutationAssessor: NA;SIFT: NA;Polyphen-2: NA	MutationAssessor: NA	SIFT: impact: deleterious, score: 0.03	Polyphen-2: impact: benign	score: 0.257	Splice_Region	SNP	Diploid
PSMB9	Stomach Adenocarcinoma (TCGA, PanCancer Atlas)	TCGA-RD-A7C1-01	STAD	Esophagogastric Adenocarcinoma	Diffuse Type Stomach Adenocarcinoma	A70del		OncoKB: NA;CIViC: NA;MyCancerGenome: not present;CancerHotspot: no;3DHotspot: no	MutationAssessor: NA;SIFT: NA;Polyphen-2: NA	MutationAssessor: NA	SIFT: impact: deleterious, score: 0.02	Polyphen-2: impact: probably_damaging	1	In_Frame_Del	DEL	ShallowDel
PSMB9	Colorectal Adenocarcinoma (TCGA, PanCancer Atlas)	TCGA-EI-6917-01	READ	Colorectal Adenocarcinoma	Rectal Adenocarcinoma	E59K		OncoKB: NA;CIViC: NA;MyCancerGenome: not present;CancerHotspot: no;3DHotspot: no	MutationAssessor: NA;SIFT: NA;Polyphen-2: NA	MutationAssessor: NA	SIFT: impact: deleterious, score: 0.05	Polyphen-2: impact: benign	0.01	Missense_Mutation	SNP	Diploid
PSMB9	Colorectal Adenocarcinoma (TCGA, PanCancer Atlas)	TCGA-AA-3821-01	COAD	Colorectal Adenocarcinoma	Mucinous Adenocarcinoma of the Colon and Rectum	A145V		OncoKB: NA;CIViC: NA;MyCancerGenome: not present;CancerHotspot: no;3DHotspot: no	MutationAssessor: NA;SIFT: NA;Polyphen-2: NA	MutationAssessor: NA	SIFT: impact: tolerated, score: 0.07	Polyphen-2: impact: possibly_damaging	0.49	Missense_Mutation	SNP	Diploid
PSMB9	Colorectal Adenocarcinoma (TCGA, PanCancer Atlas)	TCGA-AA-3877-01	COAD	Colorectal Adenocarcinoma	Mucinous Adenocarcinoma of the Colon and Rectum	P56L		OncoKB: NA;CIViC: NA;MyCancerGenome: not present;CancerHotspot: no;3DHotspot: no	MutationAssessor: NA;SIFT: NA;Polyphen-2: NA	MutationAssessor: NA	SIFT: NA	Polyphen-2: NA		Missense_Mutation	SNP	Diploid
PSMB9	Colorectal Adenocarcinoma (TCGA, PanCancer Atlas)	TCGA-AA-3984-01	COAD	Colorectal Adenocarcinoma	Colon Adenocarcinoma	N105K		OncoKB: NA;CIViC: NA;MyCancerGenome: not present;CancerHotspot: no;3DHotspot: no	MutationAssessor: NA;SIFT: NA;Polyphen-2: NA	MutationAssessor: NA	SIFT: impact: deleterious, score: 0	Polyphen-2: impact: probably_damaging	0.95	Missense_Mutation	SNP	Gain
PSMB9	Colorectal Adenocarcinoma (TCGA, PanCancer Atlas)	TCGA-CM-5861-01	COAD	Colorectal Adenocarcinoma	Colon Adenocarcinoma	G43=		OncoKB: NA;CIViC: NA;MyCancerGenome: not present;CancerHotspot: no;3DHotspot: no	MutationAssessor: NA;SIFT: NA;Polyphen-2: NA	MutationAssessor: NA	SIFT: impact: deleterious, score: 0.01	Polyphen-2: impact: probably_damaging	score: 0.996	Splice_Region	SNP	Diploid
PSMB9	Colorectal Adenocarcinoma (TCGA, PanCancer Atlas)	TCGA-EI-7002-01	READ	Colorectal Adenocarcinoma	Rectal Adenocarcinoma	A25T		OncoKB: NA;CIViC: NA;MyCancerGenome: not present;CancerHotspot: no;3DHotspot: no	MutationAssessor: NA;SIFT: NA;Polyphen-2: NA	MutationAssessor: NA	SIFT: impact: deleterious, score: 0.01	Polyphen-2: impact: benign	0.01	Missense_Mutation	SNP	Diploid
PSMB9	Head and Neck Squamous Cell Carcinoma (TCGA, PanCancer Atlas)	TCGA-BA-A8YP-01	HNSC	Head and Neck Squamous Cell Carcinoma	Head and Neck Squamous Cell Carcinoma	G129C		OncoKB: NA;CIViC: NA;MyCancerGenome: not present;CancerHotspot: no;3DHotspot: no	MutationAssessor: NA;SIFT: NA;Polyphen-2: NA	MutationAssessor: NA	SIFT: impact: tolerated, score: 0.06	Polyphen-2: impact: benign	0	Missense_Mutation	SNP	Diploid
PSMB9	Cervical Squamous Cell Carcinoma (TCGA, PanCancer Atlas)	TCGA-JW-A5VI-01	CESC	Cervical Squamous Cell Carcinoma	Cervical Squamous Cell Carcinoma	P12L		OncoKB: NA;CIViC: NA;MyCancerGenome: not present;CancerHotspot: no;3DHotspot: no	MutationAssessor: NA;SIFT: NA;Polyphen-2: NA	MutationAssessor: NA	SIFT: impact: tolerated, score: 0.19	Polyphen-2: impact: possibly_damaging	0.48	Missense_Mutation	SNP	Diploid
PSMB9	Cervical Squamous Cell Carcinoma (TCGA, PanCancer Atlas)	TCGA-C5-A8XJ-01	CESC	Cervical Squamous Cell Carcinoma	Cervical Squamous Cell Carcinoma	R104K		OncoKB: NA;CIViC: NA;MyCancerGenome: not present;CancerHotspot: no;3DHotspot: no	MutationAssessor: NA;SIFT: NA;Polyphen-2: NA	MutationAssessor: NA	SIFT: NA	Polyphen-2: NA		Missense_Mutation	SNP	Diploid
PSMC1	Breast Invasive Carcinoma (TCGA, PanCancer Atlas)	TCGA-E2-A15P-01	BRCA	Invasive Breast Carcinoma	Breast Invasive Ductal Carcinoma	SEC23A-PSMC1		OncoKB: Unknown, level NA, resistance NA;CIViC: NA;MyCancerGenome: not present;CancerHotspot: no;3DHotspot: no	MutationAssessor: NA;SIFT: NA;Polyphen-2: NA	MutationAssessor: NA	SIFT: NA	Polyphen-2: NA		fusion	FUSION	ShallowDel
PSMC1	Adrenocortical Carcinoma (TCGA, PanCancer Atlas)	TCGA-OR-A5J5-01	ACC	Adrenocortical Carcinoma	Adrenocortical Carcinoma	S137Cfs*28		OncoKB: NA;CIViC: NA;MyCancerGenome: not present;CancerHotspot: no;3DHotspot: no	MutationAssessor: NA;SIFT: NA;Polyphen-2: NA	MutationAssessor: NA	SIFT: impact: deleterious, score: 0	Polyphen-2: impact: probably_damaging	1	Frame_Shift_Del	DEL	Gain
PSMC1	Brain Lower Grade Glioma (TCGA, PanCancer Atlas)	TCGA-DH-A7UV-01	LGG	Diffuse Glioma	Astrocytoma	M1?		OncoKB: NA;CIViC: NA;MyCancerGenome: not present;CancerHotspot: no;3DHotspot: no	MutationAssessor: NA;SIFT: impact: deleterious_low_confidence, score: 0.01;Polyphen-2: impact: benign, score: 0.019	MutationAssessor: NA	SIFT: NA	Polyphen-2: NA		Translation_Start_Site	SNP	Diploid
PSMC1	Ovarian Serous Cystadenocarcinoma (TCGA, PanCancer Atlas)	TCGA-09-2044-01	OV	Ovarian Epithelial Tumor	Serous Ovarian Cancer	G403C		OncoKB: NA;CIViC: NA;MyCancerGenome: not present;CancerHotspot: no;3DHotspot: no	MutationAssessor: NA;SIFT: impact: deleterious, score: 0;Polyphen-2: impact: probably_damaging, score: 0.967	MutationAssessor: NA	SIFT: impact: deleterious, score: 0	Polyphen-2: impact: probably_damaging	0.97	Missense_Mutation	SNP	Gain
PSMC1	Ovarian Serous Cystadenocarcinoma (TCGA, PanCancer Atlas)	TCGA-29-1768-01	OV	Ovarian Epithelial Tumor	Serous Ovarian Cancer	X20_splice		OncoKB: NA;CIViC: NA;MyCancerGenome: not present;CancerHotspot: no;3DHotspot: no	MutationAssessor: NA;SIFT: NA;Polyphen-2: NA	MutationAssessor: NA	SIFT: impact: deleterious, score: 0	Polyphen-2: impact: probably_damaging	score: 0.924	Splice_Site	SNP	Diploid
PSMC1	Glioblastoma Multiforme (TCGA, PanCancer Atlas)	TCGA-06-5416-01	GBM	Glioblastoma	Glioblastoma Multiforme	L102M		OncoKB: NA;CIViC: NA;MyCancerGenome: not present;CancerHotspot: no;3DHotspot: no	MutationAssessor: NA;SIFT: impact: tolerated, score: 0.19;Polyphen-2: impact: benign, score: 0.17	MutationAssessor: NA	SIFT: impact: tolerated_low_confidence, score: 0.29	Polyphen-2: impact: probably_damaging	0.95	Missense_Mutation	SNP	ShallowDel
PSMC1	Sarcoma (TCGA, PanCancer Atlas)	TCGA-QQ-A8VF-01	SARC	Sarcoma	Leiomyosarcoma	V159M		OncoKB: NA;CIViC: NA;MyCancerGenome: not present;CancerHotspot: no;3DHotspot: no	MutationAssessor: NA;SIFT: impact: deleterious, score: 0;Polyphen-2: impact: possibly_damaging, score: 0.79	MutationAssessor: NA	SIFT: impact: deleterious, score: 0	Polyphen-2: impact: probably_damaging	1	Missense_Mutation	SNP	Gain
PSMC1	Bladder Urothelial Carcinoma (TCGA, PanCancer Atlas)	TCGA-FD-A3SS-01	BLCA	Bladder Urothelial Carcinoma	Bladder Urothelial Carcinoma	E302Q		OncoKB: NA;CIViC: NA;MyCancerGenome: not present;CancerHotspot: no;3DHotspot: no	MutationAssessor: NA;SIFT: impact: tolerated, score: 0.08;Polyphen-2: impact: probably_damaging, score: 0.999	MutationAssessor: NA	SIFT: impact: tolerated, score: 0.25	Polyphen-2: impact: benign	0.01	Missense_Mutation	SNP	Diploid
PSMC1	Bladder Urothelial Carcinoma (TCGA, PanCancer Atlas)	TCGA-KQ-A41N-01	BLCA	Bladder Urothelial Carcinoma	Bladder Urothelial Carcinoma	Q82K		OncoKB: NA;CIViC: NA;MyCancerGenome: not present;CancerHotspot: no;3DHotspot: no	MutationAssessor: NA;SIFT: impact: tolerated, score: 0.12;Polyphen-2: impact: possibly_damaging, score: 0.526	MutationAssessor: NA	SIFT: impact: deleterious, score: 0	Polyphen-2: impact: probably_damaging	1	Missense_Mutation	SNP	Diploid
PSMC1	Bladder Urothelial Carcinoma (TCGA, PanCancer Atlas)	TCGA-KQ-A41N-01	BLCA	Bladder Urothelial Carcinoma	Bladder Urothelial Carcinoma	Q195K		OncoKB: NA;CIViC: NA;MyCancerGenome: not present;CancerHotspot: no;3DHotspot: no	MutationAssessor: NA;SIFT: impact: deleterious, score: 0.03;Polyphen-2: impact: benign, score: 0.034	MutationAssessor: NA	SIFT: impact: tolerated, score: 0.1	Polyphen-2: impact: benign	0.01	Missense_Mutation	SNP	Diploid
PSMC1	Liver Hepatocellular Carcinoma (TCGA, PanCancer Atlas)	TCGA-K7-A5RG-01	LIHC	Hepatocellular Carcinoma	Hepatocellular Carcinoma	D191N		OncoKB: NA;CIViC: NA;MyCancerGenome: not present;CancerHotspot: no;3DHotspot: no	MutationAssessor: NA;SIFT: impact: deleterious, score: 0.01;Polyphen-2: impact: possibly_damaging, score: 0.51	MutationAssessor: NA	SIFT: impact: tolerated, score: 0.05	Polyphen-2: impact: benign	0.4	Missense_Mutation	SNP	ShallowDel
PSMC1	Prostate Adenocarcinoma (TCGA, PanCancer Atlas)	TCGA-ZG-A9LM-01	PRAD	Prostate Adenocarcinoma	Prostate Adenocarcinoma	L310S		OncoKB: NA;CIViC: NA;MyCancerGenome: not present;CancerHotspot: no;3DHotspot: no	MutationAssessor: NA;SIFT: impact: deleterious, score: 0;Polyphen-2: impact: probably_damaging, score: 1	MutationAssessor: NA	SIFT: impact: deleterious, score: 0.02	Polyphen-2: impact: probably_damaging	1	Missense_Mutation	SNP	Diploid
PSMC1	Kidney Renal Clear Cell Carcinoma (TCGA, PanCancer Atlas)	TCGA-EU-5906-01	KIRC	Renal Clear Cell Carcinoma	Renal Clear Cell Carcinoma	L143Q		OncoKB: NA;CIViC: NA;MyCancerGenome: not present;CancerHotspot: no;3DHotspot: no	MutationAssessor: NA;SIFT: impact: tolerated, score: 0.38;Polyphen-2: impact: benign, score: 0.001	MutationAssessor: NA	SIFT: impact: tolerated, score: 0.14	Polyphen-2: impact: benign	0.05	Missense_Mutation	SNP	Diploid
PSMC1	Uterine Corpus Endometrial Carcinoma (TCGA, PanCancer Atlas)	TCGA-AP-A059-01	UCEC	Endometrial Carcinoma	Uterine Endometrioid Carcinoma	S200F		OncoKB: NA;CIViC: NA;MyCancerGenome: not present;CancerHotspot: no;3DHotspot: no	MutationAssessor: NA;SIFT: impact: deleterious, score: 0;Polyphen-2: impact: possibly_damaging, score: 0.878	MutationAssessor: NA	SIFT: impact: tolerated, score: 0.14	Polyphen-2: impact: benign	0.05	Missense_Mutation	SNP	Diploid
PSMC1	Uterine Corpus Endometrial Carcinoma (TCGA, PanCancer Atlas)	TCGA-AP-A0LP-01	UCEC	Endometrial Carcinoma	Uterine Endometrioid Carcinoma	G291W		OncoKB: NA;CIViC: NA;MyCancerGenome: not present;CancerHotspot: no;3DHotspot: no	MutationAssessor: NA;SIFT: impact: deleterious, score: 0;Polyphen-2: impact: probably_damaging, score: 1	MutationAssessor: NA	SIFT: NA	Polyphen-2: NA		Missense_Mutation	SNP	Diploid
PSMC1	Uterine Corpus Endometrial Carcinoma (TCGA, PanCancer Atlas)	TCGA-B5-A0JY-01	UCEC	Endometrial Carcinoma	Uterine Endometrioid Carcinoma	R343S		OncoKB: NA;CIViC: NA;MyCancerGenome: not present;CancerHotspot: no;3DHotspot: no	MutationAssessor: NA;SIFT: impact: deleterious, score: 0;Polyphen-2: impact: probably_damaging, score: 0.999	MutationAssessor: NA	SIFT: impact: tolerated, score: 0.06	Polyphen-2: impact: possibly_damaging	0.64	Missense_Mutation	SNP	Diploid
PSMC1	Uterine Corpus Endometrial Carcinoma (TCGA, PanCancer Atlas)	TCGA-BS-A0UJ-01	UCEC	Endometrial Carcinoma	Uterine Endometrioid Carcinoma	L65S		OncoKB: NA;CIViC: NA;MyCancerGenome: not present;CancerHotspot: no;3DHotspot: no	MutationAssessor: NA;SIFT: impact: deleterious, score: 0.02;Polyphen-2: impact: benign, score: 0	MutationAssessor: NA	SIFT: impact: tolerated, score: 0.22	Polyphen-2: impact: probably_damaging	1	Missense_Mutation	SNP	Diploid
PSMC1	Uterine Corpus Endometrial Carcinoma (TCGA, PanCancer Atlas)	TCGA-D1-A103-01	UCEC	Endometrial Carcinoma	Uterine Endometrioid Carcinoma	X52_splice		OncoKB: NA;CIViC: NA;MyCancerGenome: not present;CancerHotspot: no;3DHotspot: no	MutationAssessor: NA;SIFT: NA;Polyphen-2: NA	MutationAssessor: NA	SIFT: impact: deleterious, score: 0.01	Polyphen-2: impact: probably_damaging	score: 0.995	Splice_Site	SNP	Diploid
PSMC1	Uterine Corpus Endometrial Carcinoma (TCGA, PanCancer Atlas)	TCGA-D1-A16Y-01	UCEC	Endometrial Carcinoma	Uterine Endometrioid Carcinoma	P279L		OncoKB: NA;CIViC: NA;MyCancerGenome: not present;CancerHotspot: no;3DHotspot: no	MutationAssessor: NA;SIFT: impact: deleterious, score: 0;Polyphen-2: impact: benign, score: 0.125	MutationAssessor: NA	SIFT: NA	Polyphen-2: NA		Missense_Mutation	SNP	Diploid
PSMC1	Uterine Corpus Endometrial Carcinoma (TCGA, PanCancer Atlas)	TCGA-D1-A176-01	UCEC	Endometrial Carcinoma	Uterine Endometrioid Carcinoma	S149L		OncoKB: NA;CIViC: NA;MyCancerGenome: not present;CancerHotspot: no;3DHotspot: no	MutationAssessor: NA;SIFT: impact: tolerated, score: 0.08;Polyphen-2: impact: benign, score: 0.001	MutationAssessor: NA	SIFT: NA	Polyphen-2: NA		Missense_Mutation	SNP	Diploid
PSMC1	Uterine Corpus Endometrial Carcinoma (TCGA, PanCancer Atlas)	TCGA-D1-A17Q-01	UCEC	Endometrial Carcinoma	Uterine Endometrioid Carcinoma	E77*		OncoKB: NA;CIViC: NA;MyCancerGenome: not present;CancerHotspot: no;3DHotspot: no	MutationAssessor: NA;SIFT: NA;Polyphen-2: NA	MutationAssessor: NA	SIFT: impact: tolerated, score: 0.61	Polyphen-2: impact: probably_damaging	1	Nonsense_Mutation	SNP	Diploid
PSMC1	Uterine Corpus Endometrial Carcinoma (TCGA, PanCancer Atlas)	TCGA-D1-A17Q-01	UCEC	Endometrial Carcinoma	Uterine Endometrioid Carcinoma	V173A		OncoKB: NA;CIViC: NA;MyCancerGenome: not present;CancerHotspot: no;3DHotspot: no	MutationAssessor: NA;SIFT: impact: deleterious, score: 0.05;Polyphen-2: impact: benign, score: 0.338	MutationAssessor: NA	SIFT: impact: deleterious, score: 0	Polyphen-2: impact: probably_damaging	1	Missense_Mutation	SNP	Diploid
PSMC1	Uterine Corpus Endometrial Carcinoma (TCGA, PanCancer Atlas)	TCGA-A5-A1OF-01	UCEC	Endometrial Carcinoma	Uterine Mixed Endometrial Carcinoma	L102M		OncoKB: NA;CIViC: NA;MyCancerGenome: not present;CancerHotspot: no;3DHotspot: no	MutationAssessor: NA;SIFT: impact: tolerated, score: 0.19;Polyphen-2: impact: benign, score: 0.17	MutationAssessor: NA	SIFT: impact: deleterious, score: 0	Polyphen-2: impact: probably_damaging	1	Missense_Mutation	SNP	Diploid
PSMC1	Uterine Corpus Endometrial Carcinoma (TCGA, PanCancer Atlas)	TCGA-A5-A0G1-01	UCEC	Endometrial Carcinoma	Uterine Serous Carcinoma/Uterine Papillary Serous Carcinoma	P435L		OncoKB: NA;CIViC: NA;MyCancerGenome: not present;CancerHotspot: no;3DHotspot: no	MutationAssessor: NA;SIFT: impact: tolerated, score: 0.13;Polyphen-2: impact: probably_damaging, score: 0.999	MutationAssessor: NA	SIFT: impact: deleterious, score: 0	Polyphen-2: impact: probably_damaging	1	Missense_Mutation	SNP	Diploid
PSMC1	Uterine Corpus Endometrial Carcinoma (TCGA, PanCancer Atlas)	TCGA-A5-A0G2-01	UCEC	Endometrial Carcinoma	Uterine Serous Carcinoma/Uterine Papillary Serous Carcinoma	X231_splice		OncoKB: NA;CIViC: NA;MyCancerGenome: not present;CancerHotspot: no;3DHotspot: no	MutationAssessor: NA;SIFT: NA;Polyphen-2: NA	MutationAssessor: NA	SIFT: impact: deleterious, score: 0	Polyphen-2: impact: benign	score: 0.027	Splice_Site	SNP	Diploid
PSMC1	Uterine Corpus Endometrial Carcinoma (TCGA, PanCancer Atlas)	TCGA-A5-A1OF-01	UCEC	Endometrial Carcinoma	Uterine Mixed Endometrial Carcinoma	L438M		OncoKB: NA;CIViC: NA;MyCancerGenome: not present;CancerHotspot: no;3DHotspot: no	MutationAssessor: NA;SIFT: impact: tolerated, score: 0.09;Polyphen-2: impact: benign, score: 0.09	MutationAssessor: NA	SIFT: impact: tolerated, score: 0.06	Polyphen-2: impact: probably_damaging	0.97	Missense_Mutation	SNP	Diploid
PSMC1	Uterine Corpus Endometrial Carcinoma (TCGA, PanCancer Atlas)	TCGA-AP-A1DK-01	UCEC	Endometrial Carcinoma	Uterine Endometrioid Carcinoma	D376G		OncoKB: NA;CIViC: NA;MyCancerGenome: not present;CancerHotspot: no;3DHotspot: no	MutationAssessor: NA;SIFT: impact: deleterious, score: 0.03;Polyphen-2: impact: benign, score: 0	MutationAssessor: NA	SIFT: impact: tolerated, score: 1	Polyphen-2: impact: probably_damaging	1	Missense_Mutation	SNP	Diploid
PSMC1	Uterine Corpus Endometrial Carcinoma (TCGA, PanCancer Atlas)	TCGA-B5-A11E-01	UCEC	Endometrial Carcinoma	Uterine Endometrioid Carcinoma	S126Y		OncoKB: NA;CIViC: NA;MyCancerGenome: not present;CancerHotspot: no;3DHotspot: no	MutationAssessor: NA;SIFT: impact: deleterious, score: 0;Polyphen-2: impact: benign, score: 0.309	MutationAssessor: NA	SIFT: impact: tolerated, score: 0.54	Polyphen-2: impact: benign	0.01	Missense_Mutation	SNP	Diploid
PSMC1	Uterine Corpus Endometrial Carcinoma (TCGA, PanCancer Atlas)	TCGA-E6-A1LX-01	UCEC	Endometrial Carcinoma	Uterine Endometrioid Carcinoma	I135M		OncoKB: NA;CIViC: NA;MyCancerGenome: not present;CancerHotspot: no;3DHotspot: no	MutationAssessor: NA;SIFT: impact: deleterious, score: 0.03;Polyphen-2: impact: benign, score: 0.062	MutationAssessor: NA	SIFT: impact: tolerated, score: 0.09	Polyphen-2: impact: benign	0	Missense_Mutation	SNP	Diploid
PSMC1	Uterine Corpus Endometrial Carcinoma (TCGA, PanCancer Atlas)	TCGA-EO-A22R-01	UCEC	Endometrial Carcinoma	Uterine Endometrioid Carcinoma	T233A		OncoKB: NA;CIViC: NA;MyCancerGenome: not present;CancerHotspot: no;3DHotspot: no	MutationAssessor: NA;SIFT: impact: deleterious, score: 0;Polyphen-2: impact: probably_damaging, score: 0.995	MutationAssessor: NA	SIFT: impact: deleterious, score: 0.03	Polyphen-2: impact: probably_damaging	1	Missense_Mutation	SNP	Diploid
PSMC1	Uterine Corpus Endometrial Carcinoma (TCGA, PanCancer Atlas)	TCGA-EO-A22X-01	UCEC	Endometrial Carcinoma	Uterine Endometrioid Carcinoma	S422Y		OncoKB: NA;CIViC: NA;MyCancerGenome: not present;CancerHotspot: no;3DHotspot: no	MutationAssessor: NA;SIFT: impact: deleterious, score: 0;Polyphen-2: impact: possibly_damaging, score: 0.794	MutationAssessor: NA	SIFT: impact: deleterious, score: 0.04	Polyphen-2: impact: probably_damaging	1	Missense_Mutation	SNP	Diploid
PSMC1	Lung Adenocarcinoma (TCGA, PanCancer Atlas)	TCGA-05-4396-01	LUAD	Non-Small Cell Lung Cancer	Lung Adenocarcinoma	P87Q		OncoKB: NA;CIViC: NA;MyCancerGenome: not present;CancerHotspot: no;3DHotspot: no	MutationAssessor: NA;SIFT: impact: tolerated, score: 0.1;Polyphen-2: impact: possibly_damaging, score: 0.779	MutationAssessor: NA	SIFT: impact: deleterious, score: 0	Polyphen-2: impact: probably_damaging	0.98	Missense_Mutation	SNP	ShallowDel
PSMC1	Esophageal Adenocarcinoma (TCGA, PanCancer Atlas)	TCGA-VR-A8EX-01	ESCA	Esophageal Squamous Cell Carcinoma	Esophageal Squamous Cell Carcinoma	Q5H		OncoKB: NA;CIViC: NA;MyCancerGenome: not present;CancerHotspot: no;3DHotspot: no	MutationAssessor: NA;SIFT: impact: tolerated_low_confidence, score: 0.2;Polyphen-2: impact: benign, score: 0.216	MutationAssessor: NA	SIFT: impact: deleterious, score: 0.01	Polyphen-2: impact: probably_damaging	0.93	Missense_Mutation	SNP	Diploid
PSMC1	Esophageal Adenocarcinoma (TCGA, PanCancer Atlas)	TCGA-L5-A8NV-01	ESCA	Esophagogastric Adenocarcinoma	Esophageal Adenocarcinoma	G392C		OncoKB: NA;CIViC: NA;MyCancerGenome: not present;CancerHotspot: no;3DHotspot: no	MutationAssessor: NA;SIFT: impact: deleterious, score: 0.05;Polyphen-2: impact: probably_damaging, score: 1	MutationAssessor: NA	SIFT: impact: tolerated, score: 0.26	Polyphen-2: impact: probably_damaging	1	Missense_Mutation	SNP	Diploid
PSMC1	Skin Cutaneous Melanoma (TCGA, PanCancer Atlas)	TCGA-D3-A1Q6-06	SKCM	Melanoma	Cutaneous Melanoma	L163R		OncoKB: NA;CIViC: NA;MyCancerGenome: not present;CancerHotspot: no;3DHotspot: no	MutationAssessor: NA;SIFT: impact: deleterious, score: 0;Polyphen-2: impact: possibly_damaging, score: 0.894	MutationAssessor: NA	SIFT: impact: deleterious, score: 0.02	Polyphen-2: impact: probably_damaging	0.97	Missense_Mutation	SNP	Diploid
PSMC1	Skin Cutaneous Melanoma (TCGA, PanCancer Atlas)	TCGA-RP-A695-06	SKCM	Melanoma	Cutaneous Melanoma	T167R		OncoKB: NA;CIViC: NA;MyCancerGenome: not present;CancerHotspot: no;3DHotspot: no	MutationAssessor: NA;SIFT: impact: deleterious, score: 0.03;Polyphen-2: impact: benign, score: 0.257	MutationAssessor: NA	SIFT: impact: tolerated, score: 0.08	Polyphen-2: impact: benign	0.09	Missense_Mutation	SNP	Diploid
PSMC1	Skin Cutaneous Melanoma (TCGA, PanCancer Atlas)	TCGA-FS-A4FC-06	SKCM	Melanoma	Cutaneous Melanoma	P106S		OncoKB: NA;CIViC: NA;MyCancerGenome: not present;CancerHotspot: no;3DHotspot: no	MutationAssessor: NA;SIFT: impact: deleterious, score: 0.02;Polyphen-2: impact: probably_damaging, score: 0.998	MutationAssessor: NA	SIFT: NA	Polyphen-2: NA		Missense_Mutation	SNP	Diploid
PSMC1	Skin Cutaneous Melanoma (TCGA, PanCancer Atlas)	TCGA-EE-A2GH-06	SKCM	Melanoma	Cutaneous Melanoma	M164I		OncoKB: NA;CIViC: NA;MyCancerGenome: not present;CancerHotspot: no;3DHotspot: no	MutationAssessor: NA;SIFT: impact: deleterious, score: 0.05;Polyphen-2: impact: benign, score: 0.013	MutationAssessor: NA	SIFT: NA	Polyphen-2: NA		Missense_Mutation	SNP	Gain
PSMC1	Skin Cutaneous Melanoma (TCGA, PanCancer Atlas)	TCGA-YD-A9TB-06	SKCM	Melanoma	Cutaneous Melanoma	K423N		OncoKB: NA;CIViC: NA;MyCancerGenome: not present;CancerHotspot: no;3DHotspot: no	MutationAssessor: NA;SIFT: impact: tolerated, score: 0.07;Polyphen-2: impact: possibly_damaging, score: 0.488	MutationAssessor: NA	SIFT: impact: deleterious, score: 0	Polyphen-2: impact: probably_damaging	1	Missense_Mutation	SNP	Diploid
PSMC1	Stomach Adenocarcinoma (TCGA, PanCancer Atlas)	TCGA-B7-5816-01	STAD	Esophagogastric Adenocarcinoma	Diffuse Type Stomach Adenocarcinoma	K23Rfs*30		OncoKB: NA;CIViC: NA;MyCancerGenome: not present;CancerHotspot: no;3DHotspot: no	MutationAssessor: NA;SIFT: NA;Polyphen-2: NA	MutationAssessor: NA	SIFT: impact: deleterious, score: 0	Polyphen-2: impact: benign	0.4	Frame_Shift_Del	DEL	Diploid
PSMC1	Stomach Adenocarcinoma (TCGA, PanCancer Atlas)	TCGA-BR-4280-01	STAD	Esophagogastric Adenocarcinoma	Stomach Adenocarcinoma	Q315H		OncoKB: NA;CIViC: NA;MyCancerGenome: not present;CancerHotspot: no;3DHotspot: no	MutationAssessor: NA;SIFT: impact: deleterious, score: 0;Polyphen-2: impact: probably_damaging, score: 0.954	MutationAssessor: NA	SIFT: impact: deleterious, score: 0.01	Polyphen-2: impact: probably_damaging	1	Missense_Mutation	SNP	Diploid
PSMC1	Stomach Adenocarcinoma (TCGA, PanCancer Atlas)	TCGA-BR-6452-01	STAD	Esophagogastric Adenocarcinoma	Stomach Adenocarcinoma	K258R		OncoKB: NA;CIViC: NA;MyCancerGenome: not present;CancerHotspot: no;3DHotspot: no	MutationAssessor: NA;SIFT: impact: deleterious, score: 0.01;Polyphen-2: impact: probably_damaging, score: 0.996	MutationAssessor: NA	SIFT: impact: deleterious, score: 0.03	Polyphen-2: impact: probably_damaging	0.94	Missense_Mutation	SNP	Diploid
PSMC1	Stomach Adenocarcinoma (TCGA, PanCancer Atlas)	TCGA-BR-7716-01	STAD	Esophagogastric Adenocarcinoma	Stomach Adenocarcinoma	K361N		OncoKB: NA;CIViC: NA;MyCancerGenome: not present;CancerHotspot: no;3DHotspot: no	MutationAssessor: NA;SIFT: impact: deleterious, score: 0.01;Polyphen-2: impact: benign, score: 0.014	MutationAssessor: NA	SIFT: NA	Polyphen-2: NA		Missense_Mutation	SNP	ShallowDel
PSMC1	Stomach Adenocarcinoma (TCGA, PanCancer Atlas)	TCGA-BR-7851-01	STAD	Esophagogastric Adenocarcinoma	Intestinal Type Stomach Adenocarcinoma	R410C		OncoKB: NA;CIViC: NA;MyCancerGenome: not present;CancerHotspot: no;3DHotspot: no	MutationAssessor: NA;SIFT: impact: tolerated, score: 0.06;Polyphen-2: impact: benign, score: 0.003	MutationAssessor: NA	SIFT: NA	Polyphen-2: NA		Missense_Mutation	SNP	Diploid
PSMC1	Stomach Adenocarcinoma (TCGA, PanCancer Atlas)	TCGA-D7-8570-01	STAD	Esophagogastric Adenocarcinoma	Tubular Stomach Adenocarcinoma	G300S		OncoKB: NA;CIViC: NA;MyCancerGenome: not present;CancerHotspot: no;3DHotspot: no	MutationAssessor: NA;SIFT: impact: tolerated, score: 0.19;Polyphen-2: impact: possibly_damaging, score: 0.483	MutationAssessor: NA	SIFT: NA	Polyphen-2: NA		Missense_Mutation	SNP	Diploid
PSMC1	Cholangiocarcinoma (TCGA, PanCancer Atlas)	TCGA-W5-AA39-01	CHOL	Cholangiocarcinoma	Intrahepatic Cholangiocarcinoma	R363_I367del		OncoKB: NA;CIViC: NA;MyCancerGenome: not present;CancerHotspot: no;3DHotspot: no	MutationAssessor: NA;SIFT: NA;Polyphen-2: NA	MutationAssessor: NA	SIFT: impact: tolerated, score: 1	Polyphen-2: impact: probably_damaging	1	In_Frame_Del	DEL	Diploid
PSMC1	Breast Invasive Carcinoma (TCGA, PanCancer Atlas)	TCGA-D8-A27V-01	BRCA	Invasive Breast Carcinoma	Breast Invasive Lobular Carcinoma	K36Rfs*17		OncoKB: NA;CIViC: NA;MyCancerGenome: not present;CancerHotspot: no;3DHotspot: no	MutationAssessor: NA;SIFT: NA;Polyphen-2: NA	MutationAssessor: NA	SIFT: NA	Polyphen-2: NA		Frame_Shift_Del	DEL	Diploid
PSMC1	Pancreatic Adenocarcinoma (TCGA, PanCancer Atlas)	TCGA-IB-7651-01	PAAD	Pancreatic Adenocarcinoma	Pancreatic Adenocarcinoma	A330T		OncoKB: NA;CIViC: NA;MyCancerGenome: not present;CancerHotspot: no;3DHotspot: no	MutationAssessor: NA;SIFT: impact: deleterious, score: 0;Polyphen-2: impact: probably_damaging, score: 0.999	MutationAssessor: NA	SIFT: NA	Polyphen-2: NA		Missense_Mutation	SNP	Diploid
PSMC1	Colorectal Adenocarcinoma (TCGA, PanCancer Atlas)	TCGA-AA-3864-01	COAD	Colorectal Adenocarcinoma	Colon Adenocarcinoma	K421Nfs*54		OncoKB: NA;CIViC: NA;MyCancerGenome: not present;CancerHotspot: no;3DHotspot: no	MutationAssessor: NA;SIFT: NA;Polyphen-2: NA	MutationAssessor: NA	SIFT: NA	Polyphen-2: NA		Frame_Shift_Del	DEL	Diploid
PSMC1	Colorectal Adenocarcinoma (TCGA, PanCancer Atlas)	TCGA-CA-6717-01	COAD	Colorectal Adenocarcinoma	Mucinous Adenocarcinoma of the Colon and Rectum	G34W		OncoKB: NA;CIViC: NA;MyCancerGenome: not present;CancerHotspot: no;3DHotspot: no	MutationAssessor: NA;SIFT: impact: deleterious, score: 0;Polyphen-2: impact: probably_damaging, score: 0.965	MutationAssessor: NA	SIFT: impact: tolerated, score: 0.08	Polyphen-2: impact: probably_damaging	0.99	Missense_Mutation	SNP	Diploid
PSMC1	Colorectal Adenocarcinoma (TCGA, PanCancer Atlas)	TCGA-CA-6717-01	COAD	Colorectal Adenocarcinoma	Mucinous Adenocarcinoma of the Colon and Rectum	P219S		OncoKB: NA;CIViC: NA;MyCancerGenome: not present;CancerHotspot: no;3DHotspot: no	MutationAssessor: NA;SIFT: impact: deleterious, score: 0;Polyphen-2: impact: probably_damaging, score: 0.924	MutationAssessor: NA	SIFT: impact: tolerated, score: 0.23	Polyphen-2: impact: benign	0.12	Missense_Mutation	SNP	Diploid
PSMC1	Colorectal Adenocarcinoma (TCGA, PanCancer Atlas)	TCGA-AA-3866-01	COAD	Colorectal Adenocarcinoma	Colon Adenocarcinoma	G14R		OncoKB: NA;CIViC: NA;MyCancerGenome: not present;CancerHotspot: no;3DHotspot: no	MutationAssessor: NA;SIFT: impact: tolerated_low_confidence, score: 0.29;Polyphen-2: impact: probably_damaging, score: 0.953	MutationAssessor: NA	SIFT: impact: deleterious, score: 0	Polyphen-2: impact: probably_damaging	1	Missense_Mutation	SNP	ShallowDel
PSMC1	Colorectal Adenocarcinoma (TCGA, PanCancer Atlas)	TCGA-AY-6197-01	COAD	Colorectal Adenocarcinoma	Colon Adenocarcinoma	G263V		OncoKB: NA;CIViC: NA;MyCancerGenome: not present;CancerHotspot: no;3DHotspot: no	MutationAssessor: NA;SIFT: impact: deleterious, score: 0;Polyphen-2: impact: probably_damaging, score: 1	MutationAssessor: NA	SIFT: NA	Polyphen-2: NA		Missense_Mutation	SNP	Diploid
PSMC1	Colorectal Adenocarcinoma (TCGA, PanCancer Atlas)	TCGA-D5-6530-01	COAD	Colorectal Adenocarcinoma	Colon Adenocarcinoma	X345_splice		OncoKB: NA;CIViC: NA;MyCancerGenome: not present;CancerHotspot: no;3DHotspot: no	MutationAssessor: NA;SIFT: NA;Polyphen-2: NA	MutationAssessor: NA	SIFT: impact: deleterious, score: 0.02	Polyphen-2: impact: probably_damaging	score: 0.948	Splice_Region	SNP	Diploid
PSMC1	Colorectal Adenocarcinoma (TCGA, PanCancer Atlas)	TCGA-DY-A1DC-01	READ	Colorectal Adenocarcinoma	Rectal Adenocarcinoma	H277Y		OncoKB: NA;CIViC: NA;MyCancerGenome: not present;CancerHotspot: no;3DHotspot: no	MutationAssessor: NA;SIFT: impact: tolerated, score: 0.25;Polyphen-2: impact: benign, score: 0.007	MutationAssessor: NA	SIFT: impact: deleterious, score: 0	Polyphen-2: impact: benign	0.43	Missense_Mutation	SNP	Diploid
PSMC1	Colorectal Adenocarcinoma (TCGA, PanCancer Atlas)	TCGA-EF-5830-01	READ	Colorectal Adenocarcinoma	Rectal Adenocarcinoma	G215S		OncoKB: NA;CIViC: NA;MyCancerGenome: not present;CancerHotspot: no;3DHotspot: no	MutationAssessor: NA;SIFT: impact: deleterious, score: 0;Polyphen-2: impact: probably_damaging, score: 0.999	MutationAssessor: NA	SIFT: impact: deleterious, score: 0	Polyphen-2: impact: probably_damaging	1	Missense_Mutation	SNP	Diploid
PSMC1	Colorectal Adenocarcinoma (TCGA, PanCancer Atlas)	TCGA-EI-6917-01	READ	Colorectal Adenocarcinoma	Rectal Adenocarcinoma	R363C		OncoKB: NA;CIViC: NA;MyCancerGenome: not present;CancerHotspot: no;3DHotspot: no	MutationAssessor: NA;SIFT: impact: tolerated, score: 0.1;Polyphen-2: impact: benign, score: 0.007	MutationAssessor: NA	SIFT: impact: deleterious, score: 0	Polyphen-2: impact: probably_damaging	0.98	Missense_Mutation	SNP	Diploid
PSMC1	Colorectal Adenocarcinoma (TCGA, PanCancer Atlas)	TCGA-F5-6814-01	READ	Colorectal Adenocarcinoma	Rectal Adenocarcinoma	G2=		OncoKB: NA;CIViC: NA;MyCancerGenome: not present;CancerHotspot: no;3DHotspot: no	MutationAssessor: NA;SIFT: NA;Polyphen-2: NA	MutationAssessor: NA	SIFT: impact: deleterious, score: 0	Polyphen-2: impact: benign	score: 0.079	Splice_Region	SNP	Diploid
PSMC1	Kidney Renal Papillary Cell Carcinoma (TCGA, PanCancer Atlas)	TCGA-A4-7583-01	KIRP	Renal Non-Clear Cell Carcinoma	Papillary Renal Cell Carcinoma	X156_splice		OncoKB: NA;CIViC: NA;MyCancerGenome: not present;CancerHotspot: no;3DHotspot: no	MutationAssessor: NA;SIFT: NA;Polyphen-2: NA	MutationAssessor: NA	SIFT: NA	Polyphen-2: NA		Splice_Site	SNP	ShallowDel
PSMC1	Cervical Squamous Cell Carcinoma (TCGA, PanCancer Atlas)	TCGA-R2-A69V-01	CESC	Cervical Squamous Cell Carcinoma	Cervical Squamous Cell Carcinoma	K38N		OncoKB: NA;CIViC: NA;MyCancerGenome: not present;CancerHotspot: no;3DHotspot: no	MutationAssessor: NA;SIFT: impact: tolerated, score: 0.05;Polyphen-2: impact: benign, score: 0.403	MutationAssessor: NA	SIFT: impact: tolerated, score: 0.31	Polyphen-2: impact: probably_damaging	0.92	Missense_Mutation	SNP	Diploid
PSMC1	Cervical Squamous Cell Carcinoma (TCGA, PanCancer Atlas)	TCGA-Q1-A73O-01	CESC	Cervical Squamous Cell Carcinoma	Cervical Squamous Cell Carcinoma	L248F		OncoKB: NA;CIViC: NA;MyCancerGenome: not present;CancerHotspot: no;3DHotspot: no	MutationAssessor: NA;SIFT: impact: deleterious, score: 0.02;Polyphen-2: impact: probably_damaging, score: 1	MutationAssessor: NA	SIFT: impact: deleterious, score: 0.01	Polyphen-2: impact: possibly_damaging	0.68	Missense_Mutation	SNP	Diploid
PSMC1	Cervical Squamous Cell Carcinoma (TCGA, PanCancer Atlas)	TCGA-2W-A8YY-01	CESC	Cervical Squamous Cell Carcinoma	Cervical Squamous Cell Carcinoma	T373M		OncoKB: NA;CIViC: NA;MyCancerGenome: not present;CancerHotspot: no;3DHotspot: no	MutationAssessor: NA;SIFT: impact: tolerated, score: 0.14;Polyphen-2: impact: benign, score: 0.047	MutationAssessor: NA	SIFT: impact: tolerated, score: 0.16	Polyphen-2: impact: benign	0.12	Missense_Mutation	SNP	Diploid
PSMC1	Cervical Squamous Cell Carcinoma (TCGA, PanCancer Atlas)	TCGA-VS-A954-01	CESC	Cervical Squamous Cell Carcinoma	Cervical Squamous Cell Carcinoma	T373M		OncoKB: NA;CIViC: NA;MyCancerGenome: not present;CancerHotspot: no;3DHotspot: no	MutationAssessor: NA;SIFT: impact: tolerated, score: 0.14;Polyphen-2: impact: benign, score: 0.047	MutationAssessor: NA	SIFT: impact: deleterious, score: 0.01	Polyphen-2: impact: probably_damaging	1	Missense_Mutation	SNP	Diploid
PSMC2	Adrenocortical Carcinoma (TCGA, PanCancer Atlas)	TCGA-OR-A5LJ-01	ACC	Adrenocortical Carcinoma	Adrenocortical Carcinoma	A269Pfs*34		OncoKB: NA;CIViC: NA;MyCancerGenome: not present;CancerHotspot: no;3DHotspot: no	MutationAssessor: NA;SIFT: NA;Polyphen-2: NA	MutationAssessor: NA	SIFT: impact: deleterious, score: 0	Polyphen-2: impact: probably_damaging	0.99	Frame_Shift_Del	DEL	Gain
PSMC2	Adrenocortical Carcinoma (TCGA, PanCancer Atlas)	TCGA-OR-A5LH-01	ACC	Adrenocortical Carcinoma	Adrenocortical Carcinoma	K46Q		OncoKB: NA;CIViC: NA;MyCancerGenome: not present;CancerHotspot: no;3DHotspot: no	MutationAssessor: NA;SIFT: impact: tolerated, score: 0.06;Polyphen-2: impact: possibly_damaging, score: 0.642	MutationAssessor: NA	SIFT: impact: tolerated, score: 0.16	Polyphen-2: impact: benign	0.28	Missense_Mutation	SNP	Gain
PSMC2	Brain Lower Grade Glioma (TCGA, PanCancer Atlas)	TCGA-DU-6392-01	LGG	Diffuse Glioma	Astrocytoma	D143N		OncoKB: NA;CIViC: NA;MyCancerGenome: not present;CancerHotspot: no;3DHotspot: no	MutationAssessor: NA;SIFT: impact: tolerated, score: 0.22;Polyphen-2: impact: probably_damaging, score: 0.998	MutationAssessor: NA	SIFT: impact: tolerated, score: 0.39	Polyphen-2: impact: probably_damaging	1	Missense_Mutation	SNP	Gain
PSMC2	Ovarian Serous Cystadenocarcinoma (TCGA, PanCancer Atlas)	TCGA-61-2096-01	OV	Ovarian Epithelial Tumor	Serous Ovarian Cancer	F274V		OncoKB: NA;CIViC: NA;MyCancerGenome: not present;CancerHotspot: no;3DHotspot: no	MutationAssessor: NA;SIFT: impact: deleterious, score: 0.01;Polyphen-2: impact: probably_damaging, score: 0.995	MutationAssessor: NA	SIFT: impact: deleterious, score: 0	Polyphen-2: impact: benign	0.18	Missense_Mutation	SNP	Diploid
PSMC2	Glioblastoma Multiforme (TCGA, PanCancer Atlas)	TCGA-32-2616-01	GBM	Glioblastoma	Glioblastoma Multiforme	R188*		OncoKB: NA;CIViC: NA;MyCancerGenome: not present;CancerHotspot: no;3DHotspot: no	MutationAssessor: NA;SIFT: NA;Polyphen-2: NA	MutationAssessor: NA	SIFT: impact: tolerated, score: 0.23	Polyphen-2: impact: benign	0.01	Nonsense_Mutation	SNP	Gain
PSMC2	Glioblastoma Multiforme (TCGA, PanCancer Atlas)	TCGA-32-2491-01	GBM	Glioblastoma	Glioblastoma Multiforme	X97_splice		OncoKB: NA;CIViC: NA;MyCancerGenome: not present;CancerHotspot: no;3DHotspot: no	MutationAssessor: NA;SIFT: NA;Polyphen-2: NA	MutationAssessor: NA	SIFT: impact: tolerated, score: 0.13	Polyphen-2: impact: benign	score: 0.031	Splice_Region	SNP	Gain
PSMC2	Sarcoma (TCGA, PanCancer Atlas)	TCGA-DX-A8BL-01	SARC	Sarcoma	Undifferentiated Pleomorphic Sarcoma/Malignant Fibrous Histiocytoma/High-Grade Spindle Cell Sarcoma	E14*		OncoKB: NA;CIViC: NA;MyCancerGenome: not present;CancerHotspot: no;3DHotspot: no	MutationAssessor: NA;SIFT: NA;Polyphen-2: NA	MutationAssessor: NA	SIFT: impact: deleterious, score: 0.05	Polyphen-2: impact: benign	0	Nonsense_Mutation	SNP	Diploid
PSMC2	Sarcoma (TCGA, PanCancer Atlas)	TCGA-QC-A7B5-01	SARC	Sarcoma	Undifferentiated Pleomorphic Sarcoma/Malignant Fibrous Histiocytoma/High-Grade Spindle Cell Sarcoma	E406Q		OncoKB: NA;CIViC: NA;MyCancerGenome: not present;CancerHotspot: no;3DHotspot: no	MutationAssessor: NA;SIFT: impact: tolerated, score: 0.61;Polyphen-2: impact: probably_damaging, score: 0.995	MutationAssessor: NA	SIFT: impact: tolerated, score: 0.25	Polyphen-2: impact: benign	0	Missense_Mutation	SNP	Gain
PSMC2	Sarcoma (TCGA, PanCancer Atlas)	TCGA-DX-A6YV-01	SARC	Sarcoma	Myxofibrosarcoma	G205V		OncoKB: NA;CIViC: NA;MyCancerGenome: not present;CancerHotspot: no;3DHotspot: no	MutationAssessor: NA;SIFT: impact: deleterious, score: 0;Polyphen-2: impact: probably_damaging, score: 0.999	MutationAssessor: NA	SIFT: impact: deleterious, score: 0	Polyphen-2: impact: possibly_damaging	0.71	Missense_Mutation	SNP	Gain
PSMC2	Lung Squamous Cell Carcinoma (TCGA, PanCancer Atlas)	TCGA-33-4538-01	LUSC	Non-Small Cell Lung Cancer	Lung Squamous Cell Carcinoma	Q247P		OncoKB: NA;CIViC: NA;MyCancerGenome: not present;CancerHotspot: no;3DHotspot: no	MutationAssessor: NA;SIFT: impact: deleterious, score: 0;Polyphen-2: impact: probably_damaging, score: 0.996	MutationAssessor: NA	SIFT: impact: deleterious, score: 0	Polyphen-2: impact: probably_damaging	1	Missense_Mutation	SNP	Gain
PSMC2	Lung Squamous Cell Carcinoma (TCGA, PanCancer Atlas)	TCGA-39-5019-01	LUSC	Non-Small Cell Lung Cancer	Lung Squamous Cell Carcinoma	G137E		OncoKB: NA;CIViC: NA;MyCancerGenome: not present;CancerHotspot: no;3DHotspot: no	MutationAssessor: NA;SIFT: impact: deleterious, score: 0;Polyphen-2: impact: probably_damaging, score: 0.999	MutationAssessor: NA	SIFT: NA	Polyphen-2: NA		Missense_Mutation	SNP	Gain
PSMC2	Lung Squamous Cell Carcinoma (TCGA, PanCancer Atlas)	TCGA-18-3421-01	LUSC	Non-Small Cell Lung Cancer	Lung Squamous Cell Carcinoma	G37C		OncoKB: NA;CIViC: NA;MyCancerGenome: not present;CancerHotspot: no;3DHotspot: no	MutationAssessor: NA;SIFT: impact: deleterious, score: 0;Polyphen-2: impact: benign, score: 0.027	MutationAssessor: NA	SIFT: impact: deleterious, score: 0.03	Polyphen-2: impact: probably_damaging	1	Missense_Mutation	SNP	Gain
PSMC2	Bladder Urothelial Carcinoma (TCGA, PanCancer Atlas)	TCGA-GC-A3RD-01	BLCA	Bladder Urothelial Carcinoma	Bladder Urothelial Carcinoma	R369K		OncoKB: NA;CIViC: NA;MyCancerGenome: not present;CancerHotspot: no;3DHotspot: no	MutationAssessor: NA;SIFT: impact: tolerated, score: 0.06;Polyphen-2: impact: probably_damaging, score: 0.968	MutationAssessor: NA	SIFT: impact: deleterious, score: 0	Polyphen-2: impact: probably_damaging	1	Missense_Mutation	SNP	Gain
PSMC2	Bladder Urothelial Carcinoma (TCGA, PanCancer Atlas)	TCGA-DK-A3X2-01	BLCA	Bladder Urothelial Carcinoma	Bladder Urothelial Carcinoma	V250I		OncoKB: NA;CIViC: NA;MyCancerGenome: not present;CancerHotspot: no;3DHotspot: no	MutationAssessor: NA;SIFT: impact: tolerated, score: 1;Polyphen-2: impact: probably_damaging, score: 0.995	MutationAssessor: NA	SIFT: impact: deleterious, score: 0.01	Polyphen-2: impact: probably_damaging	1	Missense_Mutation	SNP	Gain
PSMC2	Bladder Urothelial Carcinoma (TCGA, PanCancer Atlas)	TCGA-CF-A27C-01	BLCA	Bladder Urothelial Carcinoma	Bladder Urothelial Carcinoma	Q148E		OncoKB: NA;CIViC: NA;MyCancerGenome: not present;CancerHotspot: no;3DHotspot: no	MutationAssessor: NA;SIFT: impact: tolerated, score: 0.54;Polyphen-2: impact: benign, score: 0.006	MutationAssessor: NA	SIFT: impact: deleterious, score: 0	Polyphen-2: impact: probably_damaging	1	Missense_Mutation	SNP	ShallowDel
PSMC2	Bladder Urothelial Carcinoma (TCGA, PanCancer Atlas)	TCGA-G2-A3VY-01	BLCA	Bladder Urothelial Carcinoma	Bladder Urothelial Carcinoma	Q88H		OncoKB: NA;CIViC: NA;MyCancerGenome: not present;CancerHotspot: no;3DHotspot: no	MutationAssessor: NA;SIFT: impact: tolerated, score: 0.09;Polyphen-2: impact: benign, score: 0	MutationAssessor: NA	SIFT: impact: deleterious, score: 0	Polyphen-2: impact: probably_damaging	1	Missense_Mutation	SNP	Gain
PSMC2	Bladder Urothelial Carcinoma (TCGA, PanCancer Atlas)	TCGA-GC-A3RD-01	BLCA	Bladder Urothelial Carcinoma	Bladder Urothelial Carcinoma	E342K		OncoKB: NA;CIViC: NA;MyCancerGenome: not present;CancerHotspot: no;3DHotspot: no	MutationAssessor: NA;SIFT: impact: deleterious, score: 0.03;Polyphen-2: impact: probably_damaging, score: 0.995	MutationAssessor: NA	SIFT: impact: tolerated, score: 0.06	Polyphen-2: impact: probably_damaging	0.97	Missense_Mutation	SNP	Gain
PSMC2	Bladder Urothelial Carcinoma (TCGA, PanCancer Atlas)	TCGA-GC-A3RD-01	BLCA	Bladder Urothelial Carcinoma	Bladder Urothelial Carcinoma	D325N		OncoKB: NA;CIViC: NA;MyCancerGenome: not present;CancerHotspot: no;3DHotspot: no	MutationAssessor: NA;SIFT: impact: deleterious, score: 0.04;Polyphen-2: impact: probably_damaging, score: 0.996	MutationAssessor: NA	SIFT: impact: deleterious, score: 0	Polyphen-2: impact: probably_damaging	1	Missense_Mutation	SNP	Gain
PSMC2	Bladder Urothelial Carcinoma (TCGA, PanCancer Atlas)	TCGA-GC-A3RD-01	BLCA	Bladder Urothelial Carcinoma	Bladder Urothelial Carcinoma	A383T		OncoKB: NA;CIViC: NA;MyCancerGenome: not present;CancerHotspot: no;3DHotspot: no	MutationAssessor: NA;SIFT: impact: deleterious, score: 0;Polyphen-2: impact: probably_damaging, score: 0.977	MutationAssessor: NA	SIFT: impact: deleterious, score: 0	Polyphen-2: impact: possibly_damaging	0.51	Missense_Mutation	SNP	Gain
PSMC2	Bladder Urothelial Carcinoma (TCGA, PanCancer Atlas)	TCGA-GC-A3RD-01	BLCA	Bladder Urothelial Carcinoma	Bladder Urothelial Carcinoma	R398K		OncoKB: NA;CIViC: NA;MyCancerGenome: not present;CancerHotspot: no;3DHotspot: no	MutationAssessor: NA;SIFT: impact: deleterious, score: 0.01;Polyphen-2: impact: probably_damaging, score: 0.925	MutationAssessor: NA	SIFT: impact: tolerated, score: 0.18	Polyphen-2: impact: benign	0.17	Missense_Mutation	SNP	Gain
PSMC2	Bladder Urothelial Carcinoma (TCGA, PanCancer Atlas)	TCGA-ZF-A9RL-01	BLCA	Bladder Urothelial Carcinoma	Bladder Urothelial Carcinoma	R312T		OncoKB: NA;CIViC: NA;MyCancerGenome: not present;CancerHotspot: no;3DHotspot: no	MutationAssessor: NA;SIFT: impact: tolerated, score: 0.26;Polyphen-2: impact: probably_damaging, score: 0.996	MutationAssessor: NA	SIFT: impact: deleterious, score: 0.02	Polyphen-2: impact: probably_damaging	1	Missense_Mutation	SNP	ShallowDel
PSMC2	Bladder Urothelial Carcinoma (TCGA, PanCancer Atlas)	TCGA-DK-A2I4-01	BLCA	Bladder Urothelial Carcinoma	Bladder Urothelial Carcinoma	H358Y		OncoKB: NA;CIViC: NA;MyCancerGenome: not present;CancerHotspot: no;3DHotspot: no	MutationAssessor: NA;SIFT: impact: deleterious, score: 0.02;Polyphen-2: impact: probably_damaging, score: 0.966	MutationAssessor: NA	SIFT: impact: deleterious, score: 0.04	Polyphen-2: impact: benign	0.26	Missense_Mutation	SNP	ShallowDel
PSMC2	Bladder Urothelial Carcinoma (TCGA, PanCancer Atlas)	TCGA-FD-A6TE-01	BLCA	Bladder Urothelial Carcinoma	Bladder Urothelial Carcinoma	R360S		OncoKB: NA;CIViC: NA;MyCancerGenome: not present;CancerHotspot: no;3DHotspot: no	MutationAssessor: NA;SIFT: impact: tolerated, score: 0.08;Polyphen-2: impact: benign, score: 0.088	MutationAssessor: NA	SIFT: impact: tolerated, score: 0.63	Polyphen-2: impact: benign	0.06	Missense_Mutation	SNP	ShallowDel
PSMC2	Bladder Urothelial Carcinoma (TCGA, PanCancer Atlas)	TCGA-H4-A2HO-01	BLCA	Bladder Urothelial Carcinoma	Bladder Urothelial Carcinoma	V140=		OncoKB: NA;CIViC: NA;MyCancerGenome: not present;CancerHotspot: no;3DHotspot: no	MutationAssessor: NA;SIFT: NA;Polyphen-2: NA	MutationAssessor: NA	SIFT: impact: tolerated, score: 0.44	Polyphen-2: impact: probably_damaging	score: 0.98	Splice_Region	SNP	Diploid
PSMC2	Liver Hepatocellular Carcinoma (TCGA, PanCancer Atlas)	TCGA-ZS-A9CG-01	LIHC	Hepatocellular Carcinoma	Hepatocellular Carcinoma	R369*		OncoKB: NA;CIViC: NA;MyCancerGenome: not present;CancerHotspot: no;3DHotspot: no	MutationAssessor: NA;SIFT: NA;Polyphen-2: NA	MutationAssessor: NA	SIFT: impact: tolerated, score: 0.11	Polyphen-2: impact: benign	0.39	Nonsense_Mutation	SNP	Diploid
PSMC2	Liver Hepatocellular Carcinoma (TCGA, PanCancer Atlas)	TCGA-DD-A4NI-01	LIHC	Hepatocellular Carcinoma	Hepatocellular Carcinoma	D18A		OncoKB: NA;CIViC: NA;MyCancerGenome: not present;CancerHotspot: no;3DHotspot: no	MutationAssessor: NA;SIFT: NA;Polyphen-2: NA	MutationAssessor: NA	SIFT: NA	Polyphen-2: NA		Missense_Mutation	SNP	Gain
PSMC2	Prostate Adenocarcinoma (TCGA, PanCancer Atlas)	TCGA-KK-A8IJ-01	PRAD	Prostate Adenocarcinoma	Prostate Adenocarcinoma	A226V		OncoKB: NA;CIViC: NA;MyCancerGenome: not present;CancerHotspot: no;3DHotspot: no	MutationAssessor: NA;SIFT: impact: deleterious, score: 0;Polyphen-2: impact: probably_damaging, score: 0.995	MutationAssessor: NA	SIFT: NA	Polyphen-2: NA		Missense_Mutation	SNP	Diploid
PSMC2	Thymoma (TCGA, PanCancer Atlas)	TCGA-XU-A930-01	THYM	Thymic Epithelial Tumor	Thymoma	R428C		OncoKB: NA;CIViC: NA;MyCancerGenome: not present;CancerHotspot: no;3DHotspot: no	MutationAssessor: NA;SIFT: impact: deleterious, score: 0;Polyphen-2: impact: benign, score: 0.402	MutationAssessor: NA	SIFT: NA	Polyphen-2: NA		Missense_Mutation	SNP	Gain
PSMC2	Uterine Corpus Endometrial Carcinoma (TCGA, PanCancer Atlas)	TCGA-AX-A05Z-01	UCEC	Endometrial Carcinoma	Uterine Endometrioid Carcinoma	G313A		OncoKB: NA;CIViC: NA;MyCancerGenome: not present;CancerHotspot: no;3DHotspot: no	MutationAssessor: NA;SIFT: impact: deleterious, score: 0.01;Polyphen-2: impact: probably_damaging, score: 0.998	MutationAssessor: NA	SIFT: impact: deleterious, score: 0	Polyphen-2: impact: probably_damaging	1	Missense_Mutation	SNP	Diploid
PSMC2	Uterine Corpus Endometrial Carcinoma (TCGA, PanCancer Atlas)	TCGA-B5-A0JZ-01	UCEC	Endometrial Carcinoma	Uterine Endometrioid Carcinoma	G71D		OncoKB: NA;CIViC: NA;MyCancerGenome: not present;CancerHotspot: no;3DHotspot: no	MutationAssessor: NA;SIFT: impact: deleterious, score: 0.03;Polyphen-2: impact: probably_damaging, score: 0.943	MutationAssessor: NA	SIFT: NA	Polyphen-2: NA		Missense_Mutation	SNP	Diploid
PSMC2	Uterine Corpus Endometrial Carcinoma (TCGA, PanCancer Atlas)	TCGA-B5-A5OC-01	UCEC	Endometrial Carcinoma	Uterine Endometrioid Carcinoma	A269Pfs*34		OncoKB: NA;CIViC: NA;MyCancerGenome: not present;CancerHotspot: no;3DHotspot: no	MutationAssessor: NA;SIFT: NA;Polyphen-2: NA	MutationAssessor: NA	SIFT: impact: deleterious, score: 0.01	Polyphen-2: impact: probably_damaging	1	Frame_Shift_Del	DEL	Diploid
PSMC2	Uterine Corpus Endometrial Carcinoma (TCGA, PanCancer Atlas)	TCGA-D1-A15X-01	UCEC	Endometrial Carcinoma	Uterine Serous Carcinoma/Uterine Papillary Serous Carcinoma	R401*		OncoKB: NA;CIViC: NA;MyCancerGenome: not present;CancerHotspot: no;3DHotspot: no	MutationAssessor: NA;SIFT: NA;Polyphen-2: NA	MutationAssessor: NA	SIFT: NA	Polyphen-2: NA		Nonsense_Mutation	SNP	Diploid
PSMC2	Uterine Corpus Endometrial Carcinoma (TCGA, PanCancer Atlas)	TCGA-FI-A2D5-01	UCEC	Endometrial Carcinoma	Uterine Endometrioid Carcinoma	R401*		OncoKB: NA;CIViC: NA;MyCancerGenome: not present;CancerHotspot: no;3DHotspot: no	MutationAssessor: NA;SIFT: NA;Polyphen-2: NA	MutationAssessor: NA	SIFT: NA	Polyphen-2: NA		Nonsense_Mutation	SNP	Diploid
PSMC2	Uterine Corpus Endometrial Carcinoma (TCGA, PanCancer Atlas)	TCGA-EY-A1GU-01	UCEC	Endometrial Carcinoma	Uterine Endometrioid Carcinoma	V250I		OncoKB: NA;CIViC: NA;MyCancerGenome: not present;CancerHotspot: no;3DHotspot: no	MutationAssessor: NA;SIFT: impact: tolerated, score: 1;Polyphen-2: impact: probably_damaging, score: 0.995	MutationAssessor: NA	SIFT: NA	Polyphen-2: NA		Missense_Mutation	SNP	Diploid
PSMC2	Uterine Corpus Endometrial Carcinoma (TCGA, PanCancer Atlas)	TCGA-A5-A2K5-01	UCEC	Endometrial Carcinoma	Uterine Endometrioid Carcinoma	E67*		OncoKB: NA;CIViC: NA;MyCancerGenome: not present;CancerHotspot: no;3DHotspot: no	MutationAssessor: NA;SIFT: NA;Polyphen-2: NA	MutationAssessor: NA	SIFT: NA	Polyphen-2: NA		Nonsense_Mutation	SNP	Diploid
PSMC2	Uterine Corpus Endometrial Carcinoma (TCGA, PanCancer Atlas)	TCGA-EO-A22X-01	UCEC	Endometrial Carcinoma	Uterine Endometrioid Carcinoma	E67*		OncoKB: NA;CIViC: NA;MyCancerGenome: not present;CancerHotspot: no;3DHotspot: no	MutationAssessor: NA;SIFT: NA;Polyphen-2: NA	MutationAssessor: NA	SIFT: NA	Polyphen-2: NA		Nonsense_Mutation	SNP	Diploid
PSMC2	Uterine Corpus Endometrial Carcinoma (TCGA, PanCancer Atlas)	TCGA-A5-A0G2-01	UCEC	Endometrial Carcinoma	Uterine Serous Carcinoma/Uterine Papillary Serous Carcinoma	E391*		OncoKB: NA;CIViC: NA;MyCancerGenome: not present;CancerHotspot: no;3DHotspot: no	MutationAssessor: NA;SIFT: NA;Polyphen-2: NA	MutationAssessor: NA	SIFT: NA	Polyphen-2: NA		Nonsense_Mutation	SNP	Diploid
PSMC2	Uterine Corpus Endometrial Carcinoma (TCGA, PanCancer Atlas)	TCGA-A5-A2K5-01	UCEC	Endometrial Carcinoma	Uterine Endometrioid Carcinoma	K100N		OncoKB: NA;CIViC: NA;MyCancerGenome: not present;CancerHotspot: no;3DHotspot: no	MutationAssessor: NA;SIFT: impact: tolerated, score: 0.08;Polyphen-2: impact: probably_damaging, score: 0.994	MutationAssessor: NA	SIFT: NA	Polyphen-2: NA		Missense_Mutation	SNP	Diploid
PSMC2	Uterine Corpus Endometrial Carcinoma (TCGA, PanCancer Atlas)	TCGA-AJ-A3OJ-01	UCEC	Endometrial Carcinoma	Uterine Endometrioid Carcinoma	N114S		OncoKB: NA;CIViC: NA;MyCancerGenome: not present;CancerHotspot: no;3DHotspot: no	MutationAssessor: NA;SIFT: impact: tolerated, score: 0.23;Polyphen-2: impact: benign, score: 0.116	MutationAssessor: NA	SIFT: NA	Polyphen-2: NA		Missense_Mutation	SNP	Diploid
PSMC2	Uterine Corpus Endometrial Carcinoma (TCGA, PanCancer Atlas)	TCGA-AJ-A3OL-01	UCEC	Endometrial Carcinoma	Uterine Endometrioid Carcinoma	G382S		OncoKB: NA;CIViC: NA;MyCancerGenome: not present;CancerHotspot: no;3DHotspot: no	MutationAssessor: NA;SIFT: impact: deleterious, score: 0;Polyphen-2: impact: probably_damaging, score: 1	MutationAssessor: NA	SIFT: NA	Polyphen-2: NA		Missense_Mutation	SNP	Diploid
PSMC2	Uterine Corpus Endometrial Carcinoma (TCGA, PanCancer Atlas)	TCGA-AX-A2HD-01	UCEC	Endometrial Carcinoma	Uterine Endometrioid Carcinoma	A269Sfs*7		OncoKB: NA;CIViC: NA;MyCancerGenome: not present;CancerHotspot: no;3DHotspot: no	MutationAssessor: NA;SIFT: NA;Polyphen-2: NA	MutationAssessor: NA	SIFT: NA	Polyphen-2: NA		Frame_Shift_Ins	INS	Diploid
PSMC2	Uterine Corpus Endometrial Carcinoma (TCGA, PanCancer Atlas)	TCGA-B5-A1MX-01	UCEC	Endometrial Carcinoma	Uterine Endometrioid Carcinoma	M394I		OncoKB: NA;CIViC: NA;MyCancerGenome: not present;CancerHotspot: no;3DHotspot: no	MutationAssessor: NA;SIFT: impact: deleterious, score: 0.02;Polyphen-2: impact: probably_damaging, score: 0.948	MutationAssessor: NA	SIFT: NA	Polyphen-2: NA		Missense_Mutation	SNP	Diploid
PSMC2	Uterine Corpus Endometrial Carcinoma (TCGA, PanCancer Atlas)	TCGA-B5-A3FC-01	UCEC	Endometrial Carcinoma	Uterine Endometrioid Carcinoma	E384G		OncoKB: NA;CIViC: NA;MyCancerGenome: not present;CancerHotspot: no;3DHotspot: no	MutationAssessor: NA;SIFT: impact: deleterious, score: 0;Polyphen-2: impact: benign, score: 0.426	MutationAssessor: NA	SIFT: NA	Polyphen-2: NA		Missense_Mutation	SNP	Diploid
PSMC2	Uterine Corpus Endometrial Carcinoma (TCGA, PanCancer Atlas)	TCGA-DF-A2KN-01	UCEC	Endometrial Carcinoma	Uterine Endometrioid Carcinoma	R351Q		OncoKB: NA;CIViC: NA;MyCancerGenome: not present;CancerHotspot: no;3DHotspot: no	MutationAssessor: NA;SIFT: impact: deleterious, score: 0;Polyphen-2: impact: probably_damaging, score: 0.999	MutationAssessor: NA	SIFT: NA	Polyphen-2: NA		Missense_Mutation	SNP	Diploid
PSMC2	Uterine Corpus Endometrial Carcinoma (TCGA, PanCancer Atlas)	TCGA-DI-A1BU-01	UCEC	Endometrial Carcinoma	Uterine Mixed Endometrial Carcinoma	V416A		OncoKB: NA;CIViC: NA;MyCancerGenome: not present;CancerHotspot: no;3DHotspot: no	MutationAssessor: NA;SIFT: impact: deleterious, score: 0;Polyphen-2: impact: probably_damaging, score: 0.98	MutationAssessor: NA	SIFT: NA	Polyphen-2: NA		Missense_Mutation	SNP	Diploid
PSMC2	Uterine Corpus Endometrial Carcinoma (TCGA, PanCancer Atlas)	TCGA-EO-A22U-01	UCEC	Endometrial Carcinoma	Uterine Endometrioid Carcinoma	Q53H		OncoKB: NA;CIViC: NA;MyCancerGenome: not present;CancerHotspot: no;3DHotspot: no	MutationAssessor: NA;SIFT: impact: deleterious, score: 0;Polyphen-2: impact: benign, score: 0.079	MutationAssessor: NA	SIFT: NA	Polyphen-2: NA		Missense_Mutation	SNP	Diploid
PSMC2	Uterine Corpus Endometrial Carcinoma (TCGA, PanCancer Atlas)	TCGA-EO-A22U-01	UCEC	Endometrial Carcinoma	Uterine Endometrioid Carcinoma	R375*		OncoKB: NA;CIViC: NA;MyCancerGenome: not present;CancerHotspot: no;3DHotspot: no	MutationAssessor: NA;SIFT: NA;Polyphen-2: NA	MutationAssessor: NA	SIFT: NA	Polyphen-2: NA		Nonsense_Mutation	SNP	Diploid
PSMC2	Uterine Corpus Endometrial Carcinoma (TCGA, PanCancer Atlas)	TCGA-EO-A3B0-01	UCEC	Endometrial Carcinoma	Uterine Endometrioid Carcinoma	M299L		OncoKB: NA;CIViC: NA;MyCancerGenome: not present;CancerHotspot: no;3DHotspot: no	MutationAssessor: NA;SIFT: impact: tolerated, score: 0.31;Polyphen-2: impact: probably_damaging, score: 0.919	MutationAssessor: NA	SIFT: NA	Polyphen-2: NA		Missense_Mutation	SNP	Diploid
PSMC2	Uterine Corpus Endometrial Carcinoma (TCGA, PanCancer Atlas)	TCGA-FI-A2D5-01	UCEC	Endometrial Carcinoma	Uterine Endometrioid Carcinoma	E259A		OncoKB: NA;CIViC: NA;MyCancerGenome: not present;CancerHotspot: no;3DHotspot: no	MutationAssessor: NA;SIFT: impact: deleterious, score: 0.01;Polyphen-2: impact: possibly_damaging, score: 0.677	MutationAssessor: NA	SIFT: NA	Polyphen-2: NA		Missense_Mutation	SNP	Diploid
PSMC2	Lung Adenocarcinoma (TCGA, PanCancer Atlas)	TCGA-05-4382-01	LUAD	Non-Small Cell Lung Cancer	Lung Adenocarcinoma	E207K		OncoKB: NA;CIViC: NA;MyCancerGenome: not present;CancerHotspot: no;3DHotspot: no	MutationAssessor: NA;SIFT: impact: tolerated, score: 0.16;Polyphen-2: impact: benign, score: 0.124	MutationAssessor: NA	SIFT: NA	Polyphen-2: NA		Missense_Mutation	SNP	Diploid
PSMC2	Lung Adenocarcinoma (TCGA, PanCancer Atlas)	TCGA-50-5944-01	LUAD	Non-Small Cell Lung Cancer	Lung Adenocarcinoma	R258H		OncoKB: NA;CIViC: NA;MyCancerGenome: not present;CancerHotspot: no;3DHotspot: no	MutationAssessor: NA;SIFT: impact: deleterious, score: 0.01;Polyphen-2: impact: probably_damaging, score: 0.999	MutationAssessor: NA	SIFT: NA	Polyphen-2: NA		Missense_Mutation	SNP	Gain
PSMC2	Lung Adenocarcinoma (TCGA, PanCancer Atlas)	TCGA-55-A4DG-01	LUAD	Non-Small Cell Lung Cancer	Lung Adenocarcinoma	R400L		OncoKB: NA;CIViC: NA;MyCancerGenome: not present;CancerHotspot: no;3DHotspot: no	MutationAssessor: NA;SIFT: impact: deleterious, score: 0;Polyphen-2: impact: probably_damaging, score: 0.992	MutationAssessor: NA	SIFT: NA	Polyphen-2: NA		Missense_Mutation	SNP	ShallowDel
PSMC2	Esophageal Adenocarcinoma (TCGA, PanCancer Atlas)	TCGA-L5-A893-01	ESCA	Esophagogastric Adenocarcinoma	Esophageal Adenocarcinoma	N114D		OncoKB: NA;CIViC: NA;MyCancerGenome: not present;CancerHotspot: no;3DHotspot: no	MutationAssessor: NA;SIFT: impact: tolerated, score: 0.16;Polyphen-2: impact: benign, score: 0.278	MutationAssessor: NA	SIFT: NA	Polyphen-2: NA		Missense_Mutation	SNP	Gain
PSMC2	Skin Cutaneous Melanoma (TCGA, PanCancer Atlas)	TCGA-D3-A3MU-06	SKCM	Melanoma	Cutaneous Melanoma	P152S		OncoKB: NA;CIViC: NA;MyCancerGenome: not present;CancerHotspot: no;3DHotspot: no	MutationAssessor: NA;SIFT: impact: tolerated, score: 0.39;Polyphen-2: impact: probably_damaging, score: 0.998	MutationAssessor: NA	SIFT: NA	Polyphen-2: NA		Missense_Mutation	SNP	Gain
PSMC2	Skin Cutaneous Melanoma (TCGA, PanCancer Atlas)	TCGA-D3-A3C6-06	SKCM	Melanoma	Cutaneous Melanoma	H353Y		OncoKB: NA;CIViC: NA;MyCancerGenome: not present;CancerHotspot: no;3DHotspot: no	MutationAssessor: NA;SIFT: impact: deleterious, score: 0;Polyphen-2: impact: benign, score: 0.176	MutationAssessor: NA	SIFT: NA	Polyphen-2: NA		Missense_Mutation	SNP	Gain
PSMC2	Skin Cutaneous Melanoma (TCGA, PanCancer Atlas)	TCGA-D3-A2JB-06	SKCM	Melanoma	Cutaneous Melanoma	X64_splice		OncoKB: NA;CIViC: NA;MyCancerGenome: not present;CancerHotspot: no;3DHotspot: no	MutationAssessor: NA;SIFT: NA;Polyphen-2: NA	MutationAssessor: NA	SIFT: NA	Polyphen-2: NA		Splice_Site	SNP	Diploid
PSMC2	Skin Cutaneous Melanoma (TCGA, PanCancer Atlas)	TCGA-D3-A2JB-06	SKCM	Melanoma	Cutaneous Melanoma	Q88K		OncoKB: NA;CIViC: NA;MyCancerGenome: not present;CancerHotspot: no;3DHotspot: no	MutationAssessor: NA;SIFT: impact: tolerated, score: 0.23;Polyphen-2: impact: benign, score: 0.009	MutationAssessor: NA	SIFT: NA	Polyphen-2: NA		Missense_Mutation	SNP	Diploid
PSMC2	Skin Cutaneous Melanoma (TCGA, PanCancer Atlas)	TCGA-DA-A1I1-06	SKCM	Melanoma	Cutaneous Melanoma	S42Y		OncoKB: NA;CIViC: NA;MyCancerGenome: not present;CancerHotspot: no;3DHotspot: no	MutationAssessor: NA;SIFT: impact: tolerated, score: 0.13;Polyphen-2: impact: benign, score: 0.031	MutationAssessor: NA	SIFT: NA	Polyphen-2: NA		Missense_Mutation	SNP	Diploid
PSMC2	Skin Cutaneous Melanoma (TCGA, PanCancer Atlas)	TCGA-EE-A184-06	SKCM	Melanoma	Cutaneous Melanoma	E199D		OncoKB: NA;CIViC: NA;MyCancerGenome: not present;CancerHotspot: no;3DHotspot: no	MutationAssessor: NA;SIFT: impact: deleterious, score: 0.05;Polyphen-2: impact: benign, score: 0	MutationAssessor: NA	SIFT: NA	Polyphen-2: NA		Missense_Mutation	SNP	Diploid
PSMC2	Stomach Adenocarcinoma (TCGA, PanCancer Atlas)	TCGA-BR-4201-01	STAD	Esophagogastric Adenocarcinoma	Stomach Adenocarcinoma	A104V		OncoKB: NA;CIViC: NA;MyCancerGenome: not present;CancerHotspot: no;3DHotspot: no	MutationAssessor: NA;SIFT: impact: tolerated, score: 0.25;Polyphen-2: impact: benign, score: 0	MutationAssessor: NA	SIFT: NA	Polyphen-2: NA		Missense_Mutation	SNP	Diploid
PSMC2	Stomach Adenocarcinoma (TCGA, PanCancer Atlas)	TCGA-BR-6566-01	STAD	Esophagogastric Adenocarcinoma	Stomach Adenocarcinoma	L72M		OncoKB: NA;CIViC: NA;MyCancerGenome: not present;CancerHotspot: no;3DHotspot: no	MutationAssessor: NA;SIFT: impact: deleterious, score: 0;Polyphen-2: impact: possibly_damaging, score: 0.712	MutationAssessor: NA	SIFT: NA	Polyphen-2: NA		Missense_Mutation	SNP	Gain
PSMC2	Stomach Adenocarcinoma (TCGA, PanCancer Atlas)	TCGA-BR-6852-01	STAD	Esophagogastric Adenocarcinoma	Stomach Adenocarcinoma	A226V		OncoKB: NA;CIViC: NA;MyCancerGenome: not present;CancerHotspot: no;3DHotspot: no	MutationAssessor: NA;SIFT: impact: deleterious, score: 0;Polyphen-2: impact: probably_damaging, score: 0.995	MutationAssessor: NA	SIFT: NA	Polyphen-2: NA		Missense_Mutation	SNP	Diploid
PSMC2	Stomach Adenocarcinoma (TCGA, PanCancer Atlas)	TCGA-BR-8483-01	STAD	Esophagogastric Adenocarcinoma	Intestinal Type Stomach Adenocarcinoma	Q9H		OncoKB: NA;CIViC: NA;MyCancerGenome: not present;CancerHotspot: no;3DHotspot: no	MutationAssessor: NA;SIFT: NA;Polyphen-2: NA	MutationAssessor: NA	SIFT: NA	Polyphen-2: NA		Missense_Mutation	SNP	Gain
PSMC2	Stomach Adenocarcinoma (TCGA, PanCancer Atlas)	TCGA-BR-A4QI-01	STAD	Esophagogastric Adenocarcinoma	Stomach Adenocarcinoma	L33F		OncoKB: NA;CIViC: NA;MyCancerGenome: not present;CancerHotspot: no;3DHotspot: no	MutationAssessor: NA;SIFT: impact: deleterious, score: 0.03;Polyphen-2: impact: probably_damaging, score: 0.996	MutationAssessor: NA	SIFT: NA	Polyphen-2: NA		Missense_Mutation	SNP	Gain
PSMC2	Stomach Adenocarcinoma (TCGA, PanCancer Atlas)	TCGA-CG-5717-01	STAD	Esophagogastric Adenocarcinoma	Stomach Adenocarcinoma	A230P		OncoKB: NA;CIViC: NA;MyCancerGenome: not present;CancerHotspot: no;3DHotspot: no	MutationAssessor: NA;SIFT: impact: deleterious, score: 0;Polyphen-2: impact: probably_damaging, score: 0.999	MutationAssessor: NA	SIFT: NA	Polyphen-2: NA		Missense_Mutation	SNP	Diploid
PSMC2	Breast Invasive Carcinoma (TCGA, PanCancer Atlas)	TCGA-A2-A0CL-01	BRCA	Invasive Breast Carcinoma	Breast Invasive Ductal Carcinoma	D234H		OncoKB: NA;CIViC: NA;MyCancerGenome: not present;CancerHotspot: no;3DHotspot: no	MutationAssessor: NA;SIFT: impact: deleterious, score: 0.01;Polyphen-2: impact: probably_damaging, score: 0.999	MutationAssessor: NA	SIFT: NA	Polyphen-2: NA		Missense_Mutation	SNP	Diploid
PSMC2	Colorectal Adenocarcinoma (TCGA, PanCancer Atlas)	TCGA-EI-6917-01	READ	Colorectal Adenocarcinoma	Rectal Adenocarcinoma	R258C		OncoKB: NA;CIViC: NA;MyCancerGenome: not present;CancerHotspot: no;3DHotspot: no	MutationAssessor: NA;SIFT: impact: deleterious, score: 0;Polyphen-2: impact: probably_damaging, score: 0.999	MutationAssessor: NA	SIFT: NA	Polyphen-2: NA		Missense_Mutation	SNP	Diploid
PSMC2	Colorectal Adenocarcinoma (TCGA, PanCancer Atlas)	TCGA-AZ-4315-01	COAD	Colorectal Adenocarcinoma	Colon Adenocarcinoma	R258C		OncoKB: NA;CIViC: NA;MyCancerGenome: not present;CancerHotspot: no;3DHotspot: no	MutationAssessor: NA;SIFT: impact: deleterious, score: 0;Polyphen-2: impact: probably_damaging, score: 0.999	MutationAssessor: NA	SIFT: NA	Polyphen-2: NA		Missense_Mutation	SNP	Diploid
PSMC2	Colorectal Adenocarcinoma (TCGA, PanCancer Atlas)	TCGA-EI-6917-01	READ	Colorectal Adenocarcinoma	Rectal Adenocarcinoma	R369K		OncoKB: NA;CIViC: NA;MyCancerGenome: not present;CancerHotspot: no;3DHotspot: no	MutationAssessor: NA;SIFT: impact: tolerated, score: 0.06;Polyphen-2: impact: probably_damaging, score: 0.968	MutationAssessor: NA	SIFT: impact: tolerated, score: 0.34	Polyphen-2: impact: benign	0.01	Missense_Mutation	SNP	Diploid
PSMC2	Colorectal Adenocarcinoma (TCGA, PanCancer Atlas)	TCGA-AA-A010-01	COAD	Colorectal Adenocarcinoma	Colon Adenocarcinoma	R297I		OncoKB: NA;CIViC: NA;MyCancerGenome: not present;CancerHotspot: no;3DHotspot: no	MutationAssessor: NA;SIFT: impact: deleterious, score: 0;Polyphen-2: impact: probably_damaging, score: 0.996	MutationAssessor: NA	SIFT: impact: deleterious, score: 0.01	Polyphen-2: impact: possibly_damaging	0.55	Missense_Mutation	SNP	Diploid
PSMC2	Colorectal Adenocarcinoma (TCGA, PanCancer Atlas)	TCGA-A6-A566-01	COAD	Colorectal Adenocarcinoma	Mucinous Adenocarcinoma of the Colon and Rectum	R360C		OncoKB: NA;CIViC: NA;MyCancerGenome: not present;CancerHotspot: no;3DHotspot: no	MutationAssessor: NA;SIFT: impact: deleterious, score: 0;Polyphen-2: impact: possibly_damaging, score: 0.511	MutationAssessor: NA	SIFT: NA	Polyphen-2: NA		Missense_Mutation	SNP	Gain
PSMC2	Colorectal Adenocarcinoma (TCGA, PanCancer Atlas)	TCGA-CA-6717-01	COAD	Colorectal Adenocarcinoma	Mucinous Adenocarcinoma of the Colon and Rectum	K57N		OncoKB: NA;CIViC: NA;MyCancerGenome: not present;CancerHotspot: no;3DHotspot: no	MutationAssessor: NA;SIFT: impact: tolerated, score: 0.18;Polyphen-2: impact: benign, score: 0.167	MutationAssessor: NA	SIFT: NA	Polyphen-2: NA		Missense_Mutation	SNP	Diploid
PSMC2	Kidney Renal Papillary Cell Carcinoma (TCGA, PanCancer Atlas)	TCGA-2Z-A9J5-01	KIRP	Renal Non-Clear Cell Carcinoma	Papillary Renal Cell Carcinoma	X382_splice		OncoKB: NA;CIViC: NA;MyCancerGenome: not present;CancerHotspot: no;3DHotspot: no	MutationAssessor: NA;SIFT: NA;Polyphen-2: NA	MutationAssessor: NA	SIFT: NA	Polyphen-2: NA		Splice_Site	SNP	Gain
PSMC2	Kidney Renal Papillary Cell Carcinoma (TCGA, PanCancer Atlas)	TCGA-MH-A854-01	KIRP	Renal Non-Clear Cell Carcinoma	Papillary Renal Cell Carcinoma	N379Y		OncoKB: NA;CIViC: NA;MyCancerGenome: not present;CancerHotspot: no;3DHotspot: no	MutationAssessor: NA;SIFT: impact: deleterious, score: 0.02;Polyphen-2: impact: probably_damaging, score: 0.997	MutationAssessor: NA	SIFT: impact: deleterious, score: 0	Polyphen-2: impact: possibly_damaging	0.56	Missense_Mutation	SNP	Diploid
[truncated: 1,947 more rows]
