# Supplementary material for: Pan-cancer analysis of genomic and transcriptomic data reveals the prognostic relevance of human proteasome genes in different cancer types
Source: BMC Cancer. 2022 Sep 19;22:993. doi: 10.1186/s12885-022-10079-4 (PMC9484138; doi:10.1186/s12885-022-10079-4)
Supplement: Supplementary file 7 — Additional file 7: Supplementary Table 5. External validation of survival analysis (Overall survival; OS) for the 49 human proteasome gene family members. [file 12885_2022_10079_MOESM7_ESM.xlsx]

## Sheet: Blad1
Supplementary Table 5. External validation of survival analysis (Overall survival; OS) for the 49 human proteasome gene family members
	Breast cancer		Breast cancer		Breast cancer		Breast cancer		Breast cancer		Gastric cancer		Lung cancer		Ovarian cancer		Ovarian cancer		Ovarian cancer		Liver cancer		Liver cancer		Liver cancer
	KMplotter Affy.		TCGA Univariable		TCGA Multivariable		Validation dataset Univariable		Validation dataset Multivariable		KMplotter Affy.		KMplotter Affy.		KMplotter Affy.		TCGA univariable		TCGA Multivariable		KMplotter RNA-seq.		TCGA univariable		TCGA Multivariable
Genes	HR	P-value	HR	P-value	HR	P-value	HR	P-value	HR	P-value	HR	P-value	HR	P-value	HR	P-value	HR	P-value	HR	P-value	HR	P-value	HR	P-value	HR	P-value
PSMA1	1.24 (1.02 − 1.49)	0.027	0.88 (0.61 - 1.27)	0.49351	0.92 (0.64 - 1.34)	0.67829	0.65 (0.18 - 2.30)	0.49931	0.57 (0.13 - 2.60)	0.4692865	0.49 (0.39 − 0.61)	1.4e−10*	0.95 (0.84 − 1.08)	0.41	1.14 (0.99 − 1.32)	0.077	0.72 (0.54 - 0.95)	0.019625	0.70 (0.53 - 0.93)	0.0153130	1.87 (1.31 − 2.65)	0.00041*	2.42 (1.62 - 3.60)	< 0.001	2.83 (1.83 - 4.39)	< 0.001
PSMA2	0.81 (0.67 − 0.98)	0.033	1.29 (0.86 - 1.92)	0.21719	1.20 (0.79 - 1.80)	0.39099	2.07 (0.88 - 4.86)	0.094116	1.10 (0.41 - 3.01)	0.8454198	0.55 (0.46 − 0.67)	3.4e−10*	0.89 (0.79 − 1.01)	0.079	1.17 (1.03 − 1.34)	0.015	0.72 (0.60 - 0.86)	< 0.001	0.71 (0.59 - 0.85)	< 0.001	0.65 (0.46 − 0.93)	0.017	1.34 (0.96 - 1.85)	0.083702	1.29 (0.92 - 1.81)	0.13573
PSMA3	0.96 (0.8 − 1.16)	0.69	0.92 (0.65 - 1.30)	0.64157	0.98 (0.69 - 1.38)	0.89144	1.55 (0.77 - 3.10)	0.21802	2.02 (0.84 - 4.87)	0.1173478	0.48 (0.38 − 0.6)	1.4e−11*	1.09 (0.96 − 1.23)	0.21	1.1 (0.96 − 1.25)	0.16	0.75 (0.57 - 1.00)	0.04733	0.77 (0.58 - 1.03)	0.0765112	1.18 (0.84 − 1.67)	0.34	1.93 (1.32 - 2.83)	< 0.001	2.06 (1.39 - 3.07)	< 0.001
PSMA4	1.1 (0.91 − 1.33)	0.3	0.87 (0.61 - 1.24)	0.43707	0.97 (0.69 - 1.38)	0.88121	5.66 (1.82 - 17.60)	0.0027469	3.93 (1.17 - 13.16)	0.026365	0.56 (0.47 − 0.67)	2.2e−10*	0.99 (0.87 − 1.13)	0.9	0.88 (0.76 − 1.03)	0.12	0.71 (0.56 - 0.90)	0.0047783	0.71 (0.56 - 0.91)	0.0062972	0.62 (0.42 − 0.9)	0.012*	1.32 (0.89 - 1.95)	0.16597	1.28 (0.84 - 1.94)	0.25161
PSMA5	0.64 (0.49 − 0.83)	0.00096*	0.88 (0.62 - 1.24)	0.4669	0.91 (0.65 - 1.28)	0.58641	2.01 (0.92 - 4.41)	0.082022	1.77 (0.73 - 4.31)	0.2076169	0.62 (0.48 − 0.81)	0.00028*	0.51 (0.43 − 0.6)	2e−15*	0.74 (0.59 − 0.95)	0.015	0.70 (0.54 - 0.89)	0.0036589	0.70 (0.55 - 0.90)	0.0051618	1.55 (1.09 − 2.2)	0.013	1.64 (1.21 - 2.23)	0.0016273	1.65 (1.20 - 2.27)	0.0022128
PSMA6	1.02 (0.85 − 1.23)	0.82	1.20 (0.86 - 1.68)	0.28663	1.13 (0.81 - 1.59)	0.46388	1.71 (0.78 - 3.74)	0.17761	1.36 (0.56 - 3.31)	0.5036968	0.58 (0.49 − 0.7)	1.1e−09*	1.33 (1.17 − 1.51)	1.4e−05*	0.93 (0.82 − 1.06)	0.3	0.67 (0.50 - 0.89)	0.0052873	0.68 (0.51 - 0.91)	0.0099974	1.17 (0.8 − 1.71)	0.43	1.23 (0.87 - 1.73)	0.23589	1.28 (0.90 - 1.81)	0.166111
PSMA7	1.38 (1.14 − 1.67)	0.00077*	1.23 (0.96 - 1.56)	0.099517	1.29 (1.01 - 1.64)	0.040453	1.94 (0.50 - 7.53)	0.33648	1.39 (0.27 - 7.28)	0.6944990	0.61 (0.52 − 0.72)	9.6e−09*	1.29 (1.13 − 1.46)	9.7e−05*	1.15 (1.01 − 1.3)	0.038	0.88 (0.70 - 1.11)	0.27234	0.88 (0.69 - 1.12)	0.2882305	1.47 (1.04 − 2.07)	0.029	1.63 (1.23 - 2.16)	< 0.001	1.57 (1.17 - 2.12)	0.0029785
PSMA8	0.82 (0.63 − 1.07)	0.15	0.46 (0.11 - 1.91)	0.28491	0.61 (0.16 - 2.33)	0.47177	0.74 (0.07 - 7.57)	0.8032	0.43 (0.03 - 5.31)	0.5078723	0.82 (0.66 − 1.03)	0.082	0.97 (0.82 − 1.14)	0.68	1.37 (1.11 − 1.7)	0.0035*	6.94 (1.18 - 40.86)	0.032245	7.39 (0.75 - 73.04)	0.0872296	0.38 (0.27 − 0.54)	1.6e−08*	1.77 (1.04 - 2.99)	0.033792	1.66 (0.96 - 2.86)	0.068596
PSMB1	1.27 (1.05 − 1.53)	0.013	1.35 (0.98 - 1.85)	0.063547	1.23 (0.89 - 1.69)	0.20814	3.64 (1.28 - 10.33)	0.015181	4.72 (1.39 - 16.04)	0.0129018	0.6 (0.5 − 0.73)	2.3e−07*	0.89 (0.79 − 1.01)	0.08	1.12 (0.97 − 1.3)	0.13	1.13 (0.90 - 1.41)	0.28896	1.08 (0.86 - 1.36)	0.4935560	1.28 (0.89 − 1.84)	0.18	1.15 (0.89 - 1.49)	0.28318	1.20 (0.92 - 1.57)	0.17054
PSMB10	0.9 (0.74 − 1.08)	0.26	0.78 (0.64 - 0.95)	0.014399	0.77 (0.63 - 0.94)	0.011385	1.21 (0.71 - 2.07)	0.47989	1.50 (0.78 - 2.89)	0.2294001	0.51 (0.43 − 0.62)	1.9e−13*	1.01 (0.89 − 1.14)	0.9	0.78 (0.68 − 0.9)	0.00056*	0.95 (0.82 - 1.10)	0.49529	0.98 (0.85 - 1.13)	0.7884713	0.69 (0.48 − 0.97)	0.032	1.07 (0.86 - 1.33)	0.54417	1.06 (0.84 - 1.32)	0.63560
PSMB11	-	-	0.06 (0.00 - 28459.71)	0.67137	0.02 (0.00 - 11587.79)	0.54559	-	-	-	-	-	-	-	-	-	-	0.03 (0.00 - 1451.01)	0.53	0.12 (0.00 - 5910.08)	0.7019202	0.37 (0.26 − 0.52)	3.8e−09*	0.20 (0.00 - 3667384.36)	0.8491	0.89 (0.00 - 22988192.07)	0.98978
PSMB2	0.87 (0.66 − 1.13)	0.3	1.17 (0.88 - 1.55)	0.29447	1.25 (0.94 - 1.65)	0.12693	2.29 (1.14 - 4.61)	0.020381	2.52 (1.18 - 5.37)	0.0166104	1.4 (1.12 − 1.74)	0.0028*	0.82 (0.69 − 0.97)	0.018	1.28 (1.05 − 1.57)	0.016	0.83 (0.65 - 1.06)	0.14006	0.83 (0.64 - 1.06)	0.133988	1.63 (1.16 − 2.31)	0.0048*	2.04 (1.48 - 2.82)	< 0.001	2.10 (1.48 - 2.97)	< 0.001
PSMB3	1.06 (0.88 − 1.28)	0.54	0.89 (0.71 - 1.11)	0.29777	0.88 (0.70 - 1.11)	0.29468	1.30 (0.74 - 2.29)	0.36785	0.82 (0.35 - 1.94)	0.6587292	0.8 (0.67 − 0.95)	0.009*	1.47 (1.29 − 1.67)	3.5e−09*	1.12 (0.97 − 1.3)	0.13	0.92 (0.74 - 1.13)	0.43049	0.92 (0.74 - 1.13)	0.4218114	0.78 (0.54 − 1.12)	0.17	1.14 (0.90 - 1.43)	0.2847	1.13 (0.89 - 1.43)	0.33062
PSMB4	1.19 (0.99 − 1.44)	0.069	0.98 (0.76 - 1.26)	0.87322	0.99 (0.77 - 1.27)	0.94448	2.65 (1.03 - 6.79)	0.043154	2.27 (0.73 - 7.04)	0.1567944	0.66 (0.55 − 0.8)	9.2e−06*	0.97 (0.86 − 1.11)	0.69	1.18 (1.04 − 1.35)	0.01	0.77 (0.59 - 1.02)	0.065348	0.73 (0.55 - 0.96)	0.027296	1.26 (0.89 − 1.79)	0.19	1.34 (1.03 - 1.73)	0.027022	1.34 (1.02 - 1.75)	0.032794
PSMB5	1.38 (1.14 − 1.67)	0.00077*	0.89 (0.66 - 1.21)	0.46134	0.95 (0.70 - 1.28)	0.7155	1.85 (0.87 - 3.96)	0.11235	1.84 (0.73 - 4.62)	0.1928861	0.82 (0.69 − 0.98)	0.029	1.27 (1.12 − 1.44)	0.00025*	0.86 (0.75 − 0.99)	0.034	0.81 (0.64 - 1.03)	0.088475	0.78 (0.61 - 0.99)	0.043875	1.32 (0.93 − 1.87)	0.12	1.78 (1.23 - 2.57)	0.0022502	1.74 (1.18 - 2.56)	0.0048643
PSMB6	1.1 (0.91 − 1.33)	0.31	0.98 (0.72 - 1.32)	0.89132	0.91 (0.68 - 1.22)	0.53662	0.61 (0.23 - 1.60)	0.31262	0.34 (0.10 - 1.13)	0.0791673	0.58 (0.48 − 0.69)	1e−09*	1.15 (1.01 − 1.3)	0.031	1.19 (1.03 − 1.37)	0.016	0.79 (0.63 - 1.00)	0.05444	0.75 (0.58 - 0.96)	0.02072	0.62 (0.44 − 0.88)	0.0065*	1.11 (0.85 - 1.44)	0.45567	1.07 (0.82 - 1.41)	0.60280
PSMB7	0.87 (0.72 − 1.05)	0.16	1.04 (0.73 - 1.49)	0.81214	1.10 (0.77 - 1.57)	0.61105	2.57 (1.17 - 5.64)	0.018595	2.62 (1.12 - 6.11)	0.026261	0.67 (0.56 − 0.8)	6.9e−06*	1.54 (1.36 − 1.76)	3e−11*	1.2 (1.04 − 1.38)	0.0098*	0.95 (0.73 - 1.25)	0.73223	0.92 (0.70 - 1.21)	0.5522131	0.71 (0.49 − 1.01)	0.058	1.10 (0.81 - 1.50)	0.54972	1.09 (0.79 - 1.51)	0.59530
PSMB8	0.75 (0.62 − 0.91)	0.0029	0.76 (0.65 - 0.89)	< 0.001	0.78 (0.67 - 0.91)	0.0016523	1.41 (0.73 - 2.73)	0.30927	2.06 (0.92 - 4.57)	0.0771851	0.45 (0.37 − 0.56)	7.6e−14*	0.93 (0.82 − 1.06)	0.26	0.8 (0.7 − 0.91)	0.00056*	0.88 (0.79 - 0.98)	0.025719	0.90 (0.80 - 1.00)	0.0584459	0.73 (0.51 − 1.03)	0.071	1.02 (0.85 - 1.22)	0.83008	1.01 (0.84 - 1.21)	0.93697
PSMB9	0.83 (0.69 − 1)	0.056	0.86 (0.75 - 0.99)	0.039214	0.88 (0.76 - 1.01)	0.06745	1.59 (0.96 - 2.63)	0.071644	1.70 (0.94 - 3.08)	0.079806	0.49 (0.39 − 0.61)	1.3e−10*	1.06 (0.93 − 1.2)	0.37	0.78 (0.67 − 0.91)	0.0019*	0.88 (0.80 - 0.97)	0.0083983	0.89 (0.81 - 0.98)	0.0179547	1.17 (0.81 − 1.7)	0.4	1.09 (0.93 - 1.27)	0.30587	1.08 (0.92 - 1.26)	0.37414
PSMC1	1.27 (1.05 − 1.53)	0.013	1.00 (0.66 - 1.51)	0.98914	1.05 (0.69 - 1.59)	0.82765	5.79 (2.00 - 16.73)	0.0011886	11.13 (2.98 - 41.52)	< 0.001	1.28 (1.06 − 1.54)	0.0091	0.96 (0.84 − 1.08)	0.48	1.19 (1.02 − 1.39)	0.024	0.71 (0.53 - 0.95)	0.021822	0.74 (0.55 - 1.00)	0.0513238	1.38 (0.95 − 2.01)	0.091	1.50 (0.98 - 2.29)	0.062112	1.59 (1.03 - 2.45)	0.037239
PSMC2	0.63 (0.48 − 0.82)	0.00068*	1.05 (0.70 - 1.59)	0.80674	1.04 (0.69 - 1.55)	0.86482	4.99 (1.48 - 16.80)	0.0093724	4.17 (0.96 - 18.21)	0.0573002	0.72 (0.58 − 0.89)	0.0023*	0.52 (0.44 − 0.61)	4.5e−15*	0.88 (0.71 − 1.1)	0.26	0.74 (0.54 - 1.02)	0.062844	0.76 (0.54 - 1.05)	0.0945920	0.76 (0.52 − 1.1)	0.14	1.41 (0.95 - 2.09)	0.086762	1.41 (0.94 - 2.10)	0.096396
PSMC3	1.03 (0.85 − 1.24)	0.77	0.78 (0.58 - 1.04)	0.08688	0.83 (0.62 - 1.11)	0.20801	2.32 (0.89 - 6.04)	0.083598	3.11 (0.97 - 9.99)	0.0563521	0.74 (0.62 − 0.9)	0.0017*	1.33 (1.17 − 1.51)	1.2e−05*	0.88 (0.77 − 1.01)	0.063	0.75 (0.57 - 0.99)	0.039257	0.75 (0.56 - 0.99)	0.041305	0.74 (0.52 − 1.05)	0.09	1.38 (0.97 - 1.97)	0.075827	1.39 (0.96 - 2.02)	0.081134
PSMC3IP	1.28 (1.06 − 1.55)	0.0095*	1.07 (0.79 - 1.46)	0.66873	1.08 (0.80 - 1.47)	0.62301	1.84 (0.40 - 8.46)	0.43378	1.28 (0.21 - 7.71)	0.7850308	1.15 (0.95 − 1.39)	0.14	1.37 (1.2 − 1.55)	1.4e−06*	1.17 (1.02 − 1.33)	0.024	0.93 (0.68 - 1.29)	0.67812	0.93 (0.67 - 1.29)	0.6647670	1.8 (1.27 − 2.56)	0.00079*	2.03 (1.47 - 2.80)	< 0.001	2.19 (1.54 - 3.11)	< 0.001
PSMC4	1.18 (0.97 − 1.42)	0.091	0.86 (0.63 - 1.17)	0.33369	0.90 (0.66 - 1.22)	0.48665	1.00 (0.55 - 1.79)	0.99144	1.02 (0.53 - 1.95)	0.959512	1.26 (1.04 − 1.53)	0.016	1.37 (1.21 − 1.56)	1e−06*	1.45 (1.26 − 1.66)	1e−07*	1.11 (0.92 - 1.34)	0.27363	1.09 (0.90 - 1.32)	0.394176	0.84 (0.59 − 1.19)	0.33	1.48 (1.08 - 2.02)	0.01562	1.48 (1.06 - 2.06)	0.022821
PSMC5	0.91 (0.75 − 1.1)	0.32	0.96 (0.76 - 1.22)	0.73852	0.96 (0.75 - 1.24)	0.77202	1.45 (0.73 - 2.89)	0.28976	0.96 (0.43 - 2.14)	0.914684	0.84 (0.69 − 1)	0.054	0.99 (0.87 − 1.13)	0.9	0.92 (0.81 − 1.05)	0.24	0.90 (0.70 - 1.17)	0.42712	0.83 (0.63 - 1.08)	0.15846	1.13 (0.78 − 1.64)	0.53	1.33 (0.99 - 1.79)	0.05874	1.30 (0.95 - 1.76)	0.097051
PSMC6	1.11 (0.92 − 1.34)	0.28	1.08 (0.71 - 1.66)	0.72221	1.13 (0.73 - 1.76)	0.57741	0.88 (0.36 - 2.12)	0.76964	0.89 (0.29 - 2.68)	0.8302849	0.45 (0.36 − 0.56)	9.7e−13*	0.9 (0.79 − 1.02)	0.1	1.11 (0.98 − 1.27)	0.11	0.81 (0.61 - 1.08)	0.14731	0.84 (0.63 - 1.13)	0.2494591	0.85 (0.6 − 1.21)	0.37	1.92 (1.20 - 3.08)	0.0064255	2.06 (1.27 - 3.33)	0.0031908
PSMD1	1.09 (0.9 − 1.31)	0.39	1.48 (1.04 - 2.12)	0.031493	1.40 (0.98 - 1.99)	0.061746	1.44 (0.63 - 3.28)	0.38593	1.22 (0.46 - 3.18)	0.690549	0.85 (0.72 − 1.01)	0.067	1.35 (1.19 − 1.53)	4.6e−06*	1.1 (0.95 − 1.28)	0.18	0.89 (0.65 - 1.21)	0.44528	0.90 (0.66 - 1.23)	0.5226553	2.02 (1.44 − 2.86)	4.1e−05*	3.08 (2.05 - 4.64)	< 0.001	3.16 (2.06 - 4.84)	< 0.001
PSMD10	1.14 (0.94 − 1.38)	0.17	1.55 (1.10 - 2.18)	0.012642	1.48 (1.05 - 2.08)	0.024254	1.31 (0.53 - 3.23)	0.55938	1.39 (0.44 - 4.43)	0.5793055	0.57 (0.46 − 0.7)	1.3e−07*	0.74 (0.66 − 0.85)	5.1e−06*	1.16 (1.01 − 1.34)	0.041	0.75 (0.57 - 0.98)	0.037814	0.82 (0.62 - 1.08)	0.1551411	1.4 (0.99 − 1.99)	0.056	1.47 (1.10 - 1.95)	0.0082702	1.51 (1.13 - 2.01)	0.0055497
PSMD11	0.97 (0.8 − 1.17)	0.75	1.24 (0.95 - 1.61)	0.11389	1.19 (0.92 - 1.54)	0.18305	6.94 (2.37 - 20.31)	< 0.001	9.79 (2.68 - 35.77)	< 0.001	1.33 (1.12 − 1.58)	0.0012*	0.7 (0.61 − 0.79)	1.9e−08*	0.92 (0.81 − 1.05)	0.2	0.91 (0.66 - 1.25)	0.56099	0.91 (0.66 - 1.25)	0.5611290	1.58 (1.12 − 2.23)	0.0088*	1.92 (1.36 - 2.69)	< 0.001	1.96 (1.37 - 2.82)	< 0.001
PSMD12	1.21 (1 − 1.45)	0.051	1.22 (0.98 - 1.52)	0.078584	1.31 (1.04 - 1.64)	0.019535	5.76 (0.54 - 61.77)	0.14833	1.57 (0.08 - 30.25)	0.7652839	0.63 (0.52 − 0.77)	2.9e−06*	1.13 (1 − 1.29)	0.056	1.16 (1.01 − 1.34)	0.037	0.74 (0.57 - 0.95)	0.020491	0.72 (0.56 - 0.94)	0.0153186	1.62 (1.14 − 2.29)	0.0063*	1.70 (1.17 - 2.47)	0.005359	1.80 (1.22 - 2.65)	0.0030268
PSMD13	1.02 (0.85 − 1.23)	0.83	0.82 (0.58 - 1.17)	0.27865	0.80 (0.56 - 1.14)	0.21565	1.34 (0.34 - 5.24)	0.67559	3.76 (0.96 - 14.71)	0.0574627	0.63 (0.53 − 0.75)	2e−07*	1.07 (0.94 − 1.21)	0.29	1.1 (0.95 − 1.28)	0.21	0.93 (0.69 - 1.24)	0.60221	0.89 (0.66 - 1.20)	0.4386135	1.66 (1.17 − 2.35)	0.0037*	1.71 (1.25 - 2.35)	< 0.001	1.72 (1.24 - 2.41)	0.0013652
PSMD14	1.43 (1.19 − 1.73)	0.00017*	1.46 (1.03 - 2.06)	0.033097	1.50 (1.07 - 2.11)	0.019336	4.02 (1.97 - 8.20)	< 0.001	2.83 (1.21 - 6.58)	0.015912	0.77 (0.63 − 0.95)	0.014	1.04 (0.92 − 1.18)	0.56	1.27 (1.11 − 1.45)	0.00041*	0.76 (0.58 - 1.01)	0.056997	0.82 (0.62 - 1.10)	0.1862110	2.07 (1.44 − 2.98)	5.6e−05*	2.25 (1.64 - 3.08)	< 0.001	2.50 (1.77 - 3.52)	< 0.001
PSMD2	1.4 (1.16 − 1.69)	5e−04*	1.33 (0.99 - 1.76)	0.054221	1.39 (1.05 - 1.85)	0.022699	4.02 (2.11 - 7.66)	< 0.001	4.74 (2.20 - 10.21)	< 0.001	1.41 (1.17 − 1.7)	0.00028*	0.96 (0.85 − 1.09)	0.56	1.08 (0.94 − 1.22)	0.27	0.88 (0.69 - 1.12)	0.31474	0.92 (0.72 - 1.19)	0.5362367	1.68 (1.18 − 2.39)	0.0038*	1.87 (1.39 - 2.53)	< 0.001	1.88 (1.36 - 2.61)	< 0.001
PSMD3	1.06 (0.88 − 1.27)	0.57	1.03 (0.88 - 1.21)	0.70384	1.05 (0.89 - 1.23)	0.56249	1.25 (0.92 - 1.71)	0.15275	1.01 (0.64 - 1.57)	0.9802205	1.08 (0.9 − 1.3)	0.4	1.25 (1.1 − 1.42)	5e−04*	0.87 (0.77 − 0.99)	0.038	1.05 (0.81 - 1.35)	0.72155	1.05 (0.81 - 1.35)	0.7296578	1.24 (0.88 − 1.75)	0.22	1.28 (0.93 - 1.76)	0.13571	1.28 (0.92 - 1.78)	0.14427
PSMD4	0.95 (0.79 − 1.15)	0.63	0.94 (0.71 - 1.24)	0.64752	0.94 (0.72 - 1.25)	0.68443	0.93 (0.33 - 2.62)	0.89278	1.34 (0.41 - 4.34)	0.6258314	1.17 (0.97 − 1.4)	0.099	1.3 (1.14 − 1.48)	5.6e−05*	1.22 (1.07 − 1.38)	0.0029*	0.87 (0.64 - 1.18)	0.37524	0.82 (0.60 - 1.13)	0.2248566	1.28 (0.88 − 1.85)	0.19	1.30 (1.04 - 1.62)	0.020891	1.32 (1.05 - 1.66)	0.016904
PSMD5	0.98 (0.82 − 1.19)	0.87	1.07 (0.80 - 1.41)	0.65644	1.14 (0.86 - 1.52)	0.35357	1.17 (0.52 - 2.64)	0.69991	2.38 (0.91 - 6.25)	0.0774623	0.73 (0.61 − 0.88)	0.00057*	0.82 (0.72 − 0.93)	0.0017*	1.13 (0.99 − 1.3)	0.069	1.00 (0.80 - 1.26)	0.97679	1.12 (0.88 - 1.41)	0.3551869	0.78 (0.55 − 1.11)	0.17	1.20 (0.87 - 1.64)	0.26406	1.20 (0.87 - 1.64)	0.26601
PSMD6	1.01 (0.84 − 1.22)	0.91	0.84 (0.53 - 1.34)	0.47251	0.70 (0.43 - 1.13)	0.14106	0.42 (0.17 - 1.07)	0.070284	0.34 (0.10 - 1.14)	0.0793687	0.68 (0.57 − 0.81)	1.8e−05*	0.8 (0.7 − 0.9)	0.00038*	1.07 (0.94 − 1.23)	0.28	0.68 (0.48 - 0.96)	0.030268	0.67 (0.47 - 0.95)	0.0243126	1.42 (0.97 − 2.08)	0.071	2.64 (1.58 - 4.40)	< 0.001	2.93 (1.70 - 5.08)	< 0.001
PSMD7	1.23 (1.02 − 1.49)	0.028	1.38 (1.07 - 1.79)	0.013417	1.43 (1.11 - 1.84)	0.0050847	1.42 (0.80 - 2.52)	0.22657	1.06 (0.58 - 1.94)	0.8429196	0.53 (0.44 − 0.65)	2.5e−10*	1 (0.88 − 1.14)	0.98	1.11 (0.96 − 1.28)	0.14	0.81 (0.62 - 1.06)	0.13086	0.86 (0.66 - 1.13)	0.2869899	1.41 (0.97 − 2.04)	0.068	1.80 (1.26 - 2.58)	0.001344	1.79 (1.23 - 2.59)	0.0022476
PSMD8	1.16 (0.96 − 1.41)	0.11	1.08 (0.77 - 1.50)	0.65472	1.06 (0.76 - 1.48)	0.74882	1.51 (0.70 - 3.27)	0.29249	2.18 (0.80 - 5.95)	0.1297223	0.79 (0.67 − 0.94)	0.0069*	1.35 (1.19 − 1.53)	4.7e−06*	1.38 (1.21 − 1.58)	2.7e−06*	1.08 (0.89 - 1.32)	0.42682	1.07 (0.88 - 1.31)	0.5058488	1.31 (0.91 − 1.88)	0.15	1.48 (1.04 - 2.12)	0.029106	1.39 (0.95 - 2.03)	0.089394
PSMD9	0.99 (0.82 − 1.19)	0.91	0.91 (0.56 - 1.48)	0.69562	0.77 (0.47 - 1.24)	0.28239	0.38 (0.13 - 1.16)	0.08843	0.27 (0.07 - 1.07)	0.0632601	1.55 (1.31 − 1.84)	3.7e−07*	1.22 (1.08 − 1.39)	0.0018	0.93 (0.8 − 1.07)	0.31	1.00 (0.67 - 1.49)	0.99471	0.89 (0.59 - 1.36)	0.6035438	1.4 (0.98 − 1.99)	0.061	2.17 (1.40 - 3.35)	< 0.001	2.14 (1.35 - 3.40)	0.0012262
PSME1	0.72 (0.6 − 0.87)	0.00071*	0.68 (0.55 - 0.85)	< 0.001	0.66 (0.53 - 0.82)	< 0.001	1.23 (0.36 - 4.18)	0.74022	0.75 (0.17 - 3.23)	0.6956990	0.61 (0.51 − 0.74)	2.6e−07*	0.92 (0.81 − 1.05)	0.21	0.83 (0.73 − 0.94)	0.0047*	0.83 (0.69 - 1.00)	0.045656	0.85 (0.71 - 1.03)	0.0939445	0.65 (0.46 − 0.91)	0.013	1.03 (0.75 - 1.42)	0.85169	1.03 (0.74 - 1.42)	0.87536
PSME2	0.85 (0.71 − 1.03)	0.1	0.65 (0.52 - 0.82)	< 0.001	0.67 (0.53 - 0.83)	< 0.001	1.68 (0.97 - 2.91)	0.064742	1.85 (0.98 - 3.52)	0.0593995	0.7 (0.59 − 0.84)	6.2e−05*	1.16 (1.02 − 1.31)	0.024	0.79 (0.69 − 0.9)	0.00031*	0.79 (0.67 - 0.94)	0.0076775	0.81 (0.68 - 0.96)	0.0163299	0.64 (0.43 − 0.94)	0.023	1.10 (0.86 - 1.42)	0.45378	1.10 (0.85 - 1.43)	0.45951
PSME3	0.81 (0.67 − 0.97)	0.024	1.19 (0.86 - 1.64)	0.29192	1.11 (0.80 - 1.55)	0.52232	0.64 (0.28 - 1.48)	0.29864	0.50 (0.18 - 1.39)	0.1851704	1.63 (1.37 − 1.96)	6.8e−08*	0.86 (0.76 − 0.98)	0.019	0.91 (0.8 − 1.04)	0.15	1.06 (0.80 - 1.39)	0.70359	1.10 (0.84 - 1.46)	0.4827355	1.75 (1.21 − 2.53)	0.0028*	1.80 (1.32 - 2.45)	< 0.001	1.79 (1.31 - 2.46)	< 0.001
PSME4	1.1 (0.91 − 1.33)	0.3	1.17 (0.93 - 1.46)	0.17827	1.23 (0.98 - 1.54)	0.080388	1.77 (1.03 - 3.05)	0.038961	3.70 (1.70 - 8.03)	< 0.001	1.16 (0.96 − 1.4)	0.11	0.68 (0.6 − 0.77)	2.8e−09*	1.25 (1.08 − 1.44)	0.0032*	0.97 (0.74 - 1.27)	0.83703	0.99 (0.75 - 1.31)	0.9460234	1.23 (0.87 − 1.74)	0.23	1.74 (1.13 - 2.69)	0.012007	1.84 (1.17 - 2.90)	0.0080155
PSMF1	1.07 (0.82 − 1.4)	0.61	0.76 (0.50 - 1.16)	0.20295	0.76 (0.50 - 1.16)	0.20628	0.19 (0.02 - 1.57)	0.12467	0.12 (0.01 - 1.41)	0.0925264	1.11 (0.89 − 1.38)	0.37	0.9 (0.76 − 1.06)	0.2	1.34 (1.07 − 1.68)	0.012	1.02 (0.76 - 1.36)	0.90439	1.07 (0.80 - 1.43)	0.6572637	0.63 (0.44 − 0.9)	0.011*	1.33 (0.91 - 1.94)	0.13938	1.24 (0.84 - 1.83)	0.28936
PSMG1	1.54 (1.28 − 1.87)	5.8e−06*	1.17 (0.93 - 1.46)	0.17289	1.23 (0.99 - 1.54)	0.06373	1.52 (0.91 - 2.55)	0.10978	1.69 (0.89 - 3.20)	0.1063334	0.57 (0.47 − 0.7)	1.7e−08*	1.04 (0.92 − 1.18)	0.54	1.05 (0.92 − 1.2)	0.46	0.81 (0.65 - 1.01)	0.055729	0.83 (0.66 - 1.03)	0.092858	1.27 (0.87 − 1.85)	0.21	1.56 (1.10 - 2.21)	0.012275	1.71 (1.18 - 2.48)	0.0043747
PSMG2	0.92 (0.77 − 1.12)	0.41	0.72 (0.48 - 1.06)	0.097068	0.70 (0.48 - 1.04)	0.075294	0.46 (0.19 - 1.13)	0.091098	0.47 (0.15 - 1.42)	0.1780290	0.6 (0.49 − 0.72)	9.1e−08*	0.87 (0.76 − 0.98)	0.028	0.89 (0.78 − 1.02)	0.084	0.65 (0.49 - 0.86)	0.0022279	0.63 (0.47 - 0.84)	0.0013868	0.66 (0.46 − 0.93)	0.018	1.25 (0.84 - 1.86)	0.27253	1.29 (0.85 - 1.95)	0.225761
PSMG3	1.53 (1.16 − 2)	0.0022*	0.96 (0.75 - 1.22)	0.7153	0.98 (0.77 - 1.25)	0.86341	3.94 (1.74 - 8.94)	0.001023	10.34 (3.85 - 27.77)	< 0.001	0.71 (0.57 − 0.88)	0.0018*	1.2 (1.02 − 1.42)	0.028	1.16 (0.93 − 1.44)	0.19	0.90 (0.74 - 1.11)	0.34233	0.85 (0.69 - 1.06)	0.15431	1.73 (1.2 − 2.5)	0.0028*	1.33 (1.10 - 1.62)	0.0030782	1.30 (1.06 - 1.60)	0.011903
PSMG4	1.32 (1.01 − 1.73)	0.041	0.62 (0.38 - 1.03)	0.064822	0.57 (0.34 - 0.96)	0.032974	-	-	-	-	0.71 (0.57 − 0.88)	0.0017*	1.6 (1.35 − 1.89)	2.8e−08*	0.75 (0.61 − 0.92)	0.0061*	0.62 (0.45 - 0.86)	0.0045103	0.65 (0.47 - 0.91)	0.0114026	1.34 (0.94 − 1.9)	0.1	1.51 (1.01 - 2.24)	0.042762	1.40 (0.91 - 2.15)	0.12112
High	12		4		6		12		10		7		17		17		1		0		12		28		26
Low	6		5		4		0		1		33		10		9		16		15		11		0		0
*False discovery rate < 5% for analyses using KM Plotter.
